# Supplementary material for: Analysis of the apoplast fluid proteome during the induction of systemic acquired resistance in Arabidopsis thaliana
Source: PeerJ. 2023 Oct 20;11:e16324. doi: 10.7717/peerj.16324 (PMC10592298; doi:10.7717/peerj.16324)
Supplement: Supplemental Information 1 [file peerj-11-16324-s001.xlsx]

## Sheet: peptides
Sequence	Length	Missed cleavages	Mass	Proteins	Leading razor protein	Start position	End position	Unique (Groups)	Unique (Proteins)	Charges	PEP	Score	Experiment CK-1	Experiment CK-2	Experiment CK-3	Experiment Pst-1	Experiment Pst-2	Experiment Pst-3	LFQ intensity CK-1	LFQ intensity CK-2	LFQ intensity CK-3	LFQ intensity Pst-1	LFQ intensity Pst-2	LFQ intensity Pst-3
AAAEVLALQK	10	0	1012.59	AT4G24620.1;AT4G24620.2	AT4G24620.1	528	537	yes	no	2	4.6037e-08	160.88	1	1	1	1	1	1	0	18903000	16104000	17008000	19403000	16859000
AAALNIVPTSTGAAK	15	0	1383.77	AT1G12900.2;AT1G12900.4;AT1G12900.3;AT3G26650.1;AT1G12900.1;AT1G12900.5;AT1G42970.1	AT1G12900.2	182	196	no	no	2	0.047483	77.288	1		1	1	1	1	12201000	0	13778000	14947000	17513000	13276000
AAAVGANNQAAQSILK	16	0	1525.82	AT3G22110.1	AT3G22110.1	161	176	yes	yes	2	4.3694e-37	205.46	1	1	1	1	1	1	45564000	49400000	50228000	45560000	32692000	37778000
AADNPDFYNWNR	12	0	1481.63	AT1G57590.1	AT1G57590.1	160	171	yes	yes	2	0.015529	79.986	1	1		1			23239000	17601000	0	0	0	0
AAEADLYLAMIDDK	14	0	1537.73	AT4G25000.1	AT4G25000.1	376	389	yes	yes	2	1.5242e-07	125.54	1	1	1	1	1	1	16629000	9194000	0	20835000	14922000	27054000
AAEGEVIACHTVEDWTEK	18	0	2043.92	AT5G42980.1	AT5G42980.1	2	19	yes	yes	2;3	2.2865e-187	395.43	2	2	2	2	2	2	659540000	580470000	597920000	524200000	517110000	561610000
AAEGGAAVEEYDYLPFFYSR	20	0	2254.02	AT3G52880.1;AT3G52880.2	AT3G52880.1	331	350	yes	no	2	4.9911e-32	234.66	1			1	1		18260000	0	0	15675000	21124000	0
AAELAVSTLQALLR	14	0	1454.85	AT5G37850.4;AT5G37850.2;AT5G37850.3;AT5G37850.1	AT5G37850.4	254	267	yes	no	2	0.00083755	98.353	1	1	1	1	1	1	4160100	0	4836500	5509700	5485200	5582800
AAFDEAEK	8	0	879.397	AT1G56340.2;AT1G56340.1;AT1G09210.1	AT1G09210.1	360	367	no	no	2	0.034318	97.093	1	1	1	1	1	1	21504000	58439000	33140000	31853000	28497000	17627000
AAFEEWFVQHK	11	0	1390.67	AT5G34850.1	AT5G34850.1	331	341	yes	yes	2;3	1.6755e-12	186.16	2	2	2	2	2	2	63366000	58071000	67269000	74172000	75813000	83952000
AAGAFGAIR	9	0	832.456	AT4G22010.1	AT4G22010.1	133	141	yes	yes	2	6.6186e-07	151.17	1	1	1				61343000	54911000	0	0	0	0
AAGASWIQLDEPLFVMDLEGHK	22	0	2426.19	AT3G03780.3;AT3G03780.2;AT3G03780.1	AT3G03780.3	197	218	yes	no	3	6.1508e-34	198.35	1	1	1		1	1	24780000	7940000	19378000	0	17823000	22846000
AAGATWIQLDEPVLVMDLEGQK	22	0	2383.21	AT5G17920.2;AT5G17920.1	AT5G17920.2	197	218	yes	no	3	1.1978e-09	89.663	1	1	1	1	1	1	0	7503900	9672600	9944300	8999800	8652700
AAGGFGAINVYAR	13	0	1265.65	AT5G66920.1	AT5G66920.1	144	156	yes	yes	2	2.2029e-07	147.51	1	1	1	1	1	1	21587000	24121000	28783000	45327000	24251000	30318000
AAGGFGGLR	9	0	804.424	AT1G55570.1	AT1G55570.1	136	144	yes	yes	2	2.6886e-10	191.91	1	1	1	1	1	1	2836700000	3474200000	2625700000	3305300000	3726300000	3780300000
AAGGVGMILANTAANGEELVADAHLLPATTVGEK	34	0	3260.67	AT5G67360.1	AT5G67360.1	419	452	yes	yes	3;4	9.6073e-93	230.45	3	3	3	3	4	3	173610000	91749000	173360000	203730000	265890000	202660000
AAGLPSACK	9	0	873.438	AT2G38530.1	AT2G38530.1	93	101	yes	yes	2	0.048554	82.452	1	1	1	1	1	1	380840000	425660000	382870000	298350000	300430000	270860000
AAGMTCIVTK	10	0	1050.52	AT3G48420.1	AT3G48420.1	268	277	yes	yes	2	0.0014812	130.75	1	1	1	1	1	1	31200000	25546000	24952000	24858000	28383000	42091000
AAGPQLR	7	0	711.403	AT2G40600.1	AT2G40600.1	122	128	yes	yes	2	0.029961	109.88	1		1	1	1	1	11133000	0	12082000	13261000	12410000	4184000
AAHPEWSPSAIK	12	0	1292.65	AT2G05920.1	AT2G05920.1	551	562	yes	yes	2	6.6425e-17	177.78	1	1	1	1		1	78806000	91019000	72163000	38807000	0	44110000
AAIDDLK	7	0	744.402	AT3G05910.1;AT3G05910.2	AT3G05910.1	175	181	yes	no	2	0.019998	118.01	1	1	1	1	1	1	1171900000	1241400000	1133200000	1087000000	984480000	980400000
AALECCHK	8	0	987.427	AT5G43940.1;AT5G43940.2	AT5G43940.1	280	287	yes	no	2	0.013621	117.17	1	1	1	1	1	1	27941000	60712000	31869000	30750000	30825000	30197000
AALENECPNTVSCADALTLAAR	22	0	2346.09	AT2G18150.1;AT2G18140.1	AT2G18150.1	119	140	yes	no	2	2.6698e-06	157.68	1	1				1	37097000	20346000	0	0	0	39374000
AALESDTR	8	0	861.419	AT2G05990.2;AT2G05990.1	AT2G05990.2	283	290	yes	no	2	0.00063961	139.31	1	1	1	1	1	1	43642000	41758000	45931000	0	0	0
AALLEFR	7	0	818.465	AT5G12940.1	AT5G12940.1	33	39	yes	yes	2	0.0010723	175.94	1	1	1				267040000	114420000	90648000	0	0	0
AALLNHAIPLYQQVEYFK	18	0	2117.13	AT3G16370.1	AT3G16370.1	121	138	yes	yes	2;3	6.2589e-15	173.72	1	1	1	1	1	2	14192000	29170000	31787000	18384000	13450000	17525000
AALQAGIDK	9	0	885.492	AT2G28000.1	AT2G28000.1	59	67	yes	yes	2	0.0086721	115.49	1	1	1		1	1	25807000	44483000	39018000	0	26903000	24215000
AALQETNK	8	0	873.456	AT4G36195.1;AT4G36195.3;AT4G36195.2	AT4G36195.1	227	234	yes	no	2	3.7148e-07	160.03	2		1	1	1	1	0	0	0	42561000	0	44325000
AALQSIR	7	0	757.445	AT3G17640.1	AT3G17640.1	26	32	yes	yes	2	0.04305	101.21	1		1	1	1	1	18417000	0	17329000	20323000	18958000	16061000
AALTDLSSR	9	0	932.493	AT2G34930.1	AT2G34930.1	46	54	yes	yes	2	6.0419e-52	253.18	1	1	1	1	1	1	744770000	957920000	674400000	693420000	682650000	685830000
AAMGEDTFWAIR	12	0	1366.63	AT5G44400.1	AT5G44400.1	225	236	yes	yes	2	0.0055825	91.265	1	1					13938000	9440600	0	0	0	0
AAMGEDVFWAIR	12	0	1364.65	AT2G34790.1;AT1G30760.1;AT1G30760.2	AT2G34790.1	223	234	no	no	2	2.6418e-17	183.47	2	2	2	1	2	3	66413000	23311000	69646000	20373000	40367000	56128000
AAMTEEDLAELAR	13	0	1418.67	AT3G19170.1;AT3G19170.2	AT3G19170.1	589	601	yes	no	2	1.3156e-14	152.54	1		1			2	0	0	11228000	0	0	0
AANVAYPTTEAELISVVAAATK	22	0	2189.16	AT2G46760.1	AT2G46760.1	68	89	yes	yes	2;3	6.7235e-70	184.38	2	2	2	2	2	2	167000000	146770000	178930000	169580000	178220000	173110000
AAPDLAAEPK	10	0	981.513	AT3G10720.2;AT3G10720.1	AT3G10720.2	505	514	yes	no	1;2	0.013991	96.948	2	1	2	1	2	1	65652000	11070000	76686000	38761000	10500000	33729000
AAPEGGISDVVEK	13	0	1270.64	AT3G62410.1	AT3G62410.1	54	66	yes	yes	2	0.00040894	125.74	1	1	1	1	1	1	285880000	287940000	276150000	184660000	219310000	156500000
AAPVAEAPKPAEEEEAPKPK	20	2	2058.06	AT1G57720.2;AT1G57720.1	AT1G57720.2	233	252	yes	no	3;4	2.428e-09	92.31	2	2	2	2	2	2	54587000	58366000	19270000	42885000	31418000	37269000
AAPVTTETKEEEK	13	1	1431.71	AT1G22530.1	AT1G22530.1	238	250	yes	yes	2;3	5.2537e-26	209.97	2	2	2	2	2	2	53687000	73900000	65333000	34545000	45401000	30606000
AAQATTQDDLLTWVK	15	0	1659.85	AT1G67280.1	AT1G67280.1	69	83	yes	yes	2	7.6145e-19	178.81	1	1	1	1	1	1	31383000	28413000	22413000	42563000	40555000	26403000
AAQDIANAELAPTHPIR	17	0	1786.93	AT1G35160.1;AT1G35160.2	AT1G35160.1	163	179	yes	no	3	0.0021669	51.785	1	1	1	1	1	1	59053000	37965000	28249000	28915000	23535000	38414000
AAQDIANSELAPTHPIR	17	0	1802.93	AT4G09000.1;AT4G09000.2	AT4G09000.1	162	178	yes	no	2;3	1.8409e-14	225.72	2	1	2	2			103330000	49608000	73209000	49209000	0	0
AAQDILLAR	9	0	969.561	AT2G21330.1;AT2G21330.3	AT2G21330.1	359	367	yes	no	2	3.1551e-11	199.29	1	1	1	1	1	1	1037400000	683460000	658860000	714400000	782060000	798410000
AAQDSVCDAIEAIEGGPK	18	0	1829.85	AT1G03475.1	AT1G03475.1	90	107	yes	yes	2;3	0.00024449	159	1	1	1	2	2	2	66958000	39763000	58737000	87644000	91112000	83006000
AAQDVAVADLAPTHPIR	17	0	1743.93	AT5G65430.2;AT5G65430.1;AT5G65430.3	AT5G65430.2	160	176	yes	no	3	0.01526	56.851		1	1			2	0	23511000	18204000	0	0	20011000
AAQEALYVR	9	0	1019.54	AT3G52930.1	AT3G52930.1	317	325	yes	yes	2	0.0077879	119.27	1	1	1		1		20471000	0	14977000	0	0	0
AAQQYVER	8	0	963.477	AT3G57610.1	AT3G57610.1	459	466	yes	yes	2	0.018275	109.86	1	1	1	1	1		13824000	20087000	14280000	11990000	16189000	0
AASFNIIPSSTGAAK	15	0	1433.75	AT1G13440.1;AT1G13440.2;AT3G04120.1	AT3G04120.1	205	219	no	no	2	1.5511e-09	125.54		1	1	1	3	1	0	82628000	85541000	83708000	0	79621000
AASGEYCDTEKPEFPCAQGK	20	1	2243.95	AT2G43570.1	AT2G43570.1	152	171	yes	yes	3	2.3939e-23	176.46	1	1	1	1	1	1	386010000	653240000	587880000	504360000	390690000	461020000
AASSAVTANYVLKPPPFALDALEPHMSK	28	1	2924.51	AT4G25100.5;AT4G25100.3;AT4G25100.2;AT4G25100.1	AT4G25100.5	2	29	yes	no	3	0.0019356	40.744						1	0	0	0	0	0	5968100
AATAQANSLNK	11	0	1087.56	AT1G04750.1;AT2G33120.1;AT2G33120.2;AT1G04750.4;AT1G04750.3;AT1G04750.2	AT1G04750.1	98	108	yes	no	2	0.013921	87.149	1	1	1	1	1		10925000	32963000	19126000	110070000	10824000	0
AATATEK	7	0	690.355	AT5G17310.2	AT5G17310.2	2	8	yes	yes	1	0.0093205	158.12	2	1	1	1	1	1	37189000	37444000	30447000	38212000	30624000	35115000
AATAYIFVDNAAYR	14	0	1544.76	AT4G24350.1;AT4G24350.3;AT4G24350.2;AT4G24350.4	AT4G24350.1	250	263	yes	no	2	0.00016802	128.17	1		1	1		1	12563000	0	20559000	16182000	0	16019000
AATSDTLTAPYNDIAAVEK	19	0	1949.96	AT3G48730.1	AT3G48730.1	218	236	yes	yes	2	6.5688e-29	188.13	1	1	1	1	1	1	69045000	65472000	67328000	85461000	64606000	78813000
AATSDTLTAPYNDLEAVEK	19	0	2007.96	AT5G63570.1;AT5G63570.2	AT5G63570.1	220	238	yes	no	2	7.6224e-15	227.06	1	1	1	1	1	1	55203000	63236000	64973000	67622000	77749000	84044000
AATSLPEK	8	0	815.439	AT3G46970.1	AT3G46970.1	8	15	yes	yes	2	0.060258	86.095				1	1	1	0	0	0	18834000	22198000	15796000
AATTENLPQLK	11	0	1184.64	AT3G03250.3;AT3G03250.1;AT3G03250.2	AT3G03250.3	2	12	yes	no	2	9.2644e-13	185.58	1	1	1	1	1	1	54253000	75583000	71693000	78527000	70010000	61115000
AATYDEIKK	9	1	1037.54	AT1G13440.1;AT1G13440.2;AT3G04120.1	AT3G04120.1	256	264	no	no	2	0.064477	121.74	1	1	1	1	1	1	26491000	39751000	28497000	31341000	37033000	26690000
AATYFWPGSEVHK	13	0	1491.71	AT4G29680.1	AT4G29680.1	210	222	yes	yes	2;3	2.2628e-05	128.91	2	1	1	1	2	1	60748000	32094000	27791000	53934000	83969000	28313000
AAVAYEPNKPLVIEDVQVAPPQAGEVR	27	1	2859.51	AT5G43940.1	AT5G43940.1	12	38	yes	yes	3	4.3753e-08	90.974	1	1	1	1	1	1	100310000	95543000	110110000	101330000	116340000	92281000
AAVEEGIVVGGGCTLLR	17	0	1699.89	AT1G55490.5;AT1G55490.4;AT1G55490.3;AT1G55490.2;AT1G55490.1;AT5G56500.2;AT5G56500.1	AT1G55490.5	459	475	no	no	2	7.6916e-28	193.81	1	1	1	1	1	1	78334000	51684000	71542000	50238000	38571000	46132000
AAVENACPGVVSCADILTLAAR	22	0	2257.12	AT5G19890.1	AT5G19890.1	110	131	yes	yes	2;3	7.1986e-13	196.22	1	1	1	1	2	2	11556000	16774000	21770000	74831000	113970000	112190000
AAVGAPDHLGDCPFSQR	17	0	1796.83	AT1G19570.1	AT1G19570.1	9	25	yes	yes	2;3	6.4602e-75	251.24	2	2	2	2	2	2	1187900000	1031900000	1045000000	1375100000	1322900000	1561300000
AAVGTIDEDFICATLDWWPPEK	22	0	2533.18	AT5G34940.2;AT5G34940.3	AT5G34940.2	39	60	yes	no	2;3	1.6114e-18	165.49	2		2	2	2	2	32223000	0	19809000	36067000	35630000	22421000
AAVTPAFAPAYAGINGLGVSLAR	23	0	2186.18	AT5G20630.1	AT5G20630.1	69	91	yes	yes	2	3.9344e-37	248.81	1	1	1	1	1	1	666600000	508420000	562190000	715220000	592680000	812420000
AAWEEYDATCLISK	14	0	1655.75	AT2G41530.1	AT2G41530.1	200	213	yes	yes	2	0.00045042	108.37	1		1	1			22369000	0	0	30852000	0	0
AAWSESHIR	9	0	1055.51	AT5G65730.1	AT5G65730.1	41	49	yes	yes	1;2;3	2.2578e-52	260.87	3	3	3	3	3	3	1755700000	1865400000	1517800000	1431000000	1542200000	1198400000
AAYALSEGLGVIACIGEK	18	0	1820.93	AT2G21170.2;AT2G21170.3;AT2G21170.1	AT2G21170.2	164	181	yes	no	2;3	8.9402e-05	132.47	2	1	2	2	2	2	3769500	6026300	10917000	18379000	19190000	20221000
ACAYTSPLQGISR	13	0	1422.69	AT5G49360.1	AT5G49360.1	441	453	yes	yes	2	1.3042e-21	192.12	1	1	1	1	1	2	2967300000	3397300000	3361700000	4135900000	4134700000	4464500000
ACDSDSLDQEK	11	0	1266.5	AT1G20160.1;AT1G20160.2;AT1G20160.3	AT1G20160.1	390	400	yes	no	2	4.0411e-20	202.2	1	1	1	1	1	1	547450000	662190000	458510000	382800000	392720000	368500000
ACGVNIPYK	9	0	1020.51	AT2G38540.1	AT2G38540.1	99	107	yes	yes	2	2.4817e-10	192.56	1	1	1	1	1	1	4417500000	5848000000	4478300000	1688300000	1580900000	1766200000
ACLNGIIGELPNCCDGK	17	0	1889.84	AT3G22060.1	AT3G22060.1	213	229	yes	yes	2;3	2.6111e-05	167.44	1		1	1	1	2	18120000	0	36051000	11483000	153900000	177310000
ACNVQTPPVSR	11	0	1227.6	AT3G22600.1	AT3G22600.1	94	104	yes	yes	2	1.0007e-11	180.8	1	1	1	1	1	1	149660000	139050000	135830000	83108000	80677000	90317000
ACPGVVSCADILAIAAR	17	0	1742.88	AT5G05340.1	AT5G05340.1	118	134	yes	yes	2	3.4661e-20	222.49	1	1	1	1	1	1	283790000	189480000	211410000	486490000	484660000	558970000
ACQCPECSCK	10	0	1298.45	AT2G14740.2;AT2G14740.1;AT2G14720.2;AT2G14720.1	AT2G14740.2	526	535	yes	no	2	0.0078022	107.57	1	1	1		1	1	0	9038600	8500100	0	3804300	5156500
ACQNITQPLR	10	0	1199.61	AT1G50480.1	AT1G50480.1	504	513	yes	yes	2	0.0098506	104.06	1		1	1	1	1	0	0	11207000	13015000	9554600	19805000
ACVTCCYR	8	0	1088.42	AT5G14920.1	AT5G14920.1	236	243	yes	yes	2	0.00071236	168.74	1	1	1	1	1	1	48936000	75866000	56349000	13561000	14814000	20447000
ADACVSSGGR	10	0	978.419	AT5G57550.1	AT5G57550.1	223	232	yes	yes	2	2.9863e-11	181.41	1	1	1	1	1	1	43626000	47882000	44507000	99685000	134150000	105850000
ADAGHVVVEK	10	0	1023.53	AT3G63140.1	AT3G63140.1	212	221	yes	yes	2	2.4194e-14	187.23	1	1	1	1	1	1	186790000	182650000	131450000	148730000	150910000	140100000
ADATVAADGSGTFK	14	0	1309.62	AT3G14310.1	AT3G14310.1	280	293	yes	yes	2	4.3621e-28	199.7	1	1	1	1	1	1	81356000	86918000	74128000	38065000	34648000	22974000
ADDCIGPEVESLVASLPEGGVLLLENVR	28	0	2950.5	AT3G12780.1	AT3G12780.1	170	197	yes	yes	3	8.2173e-28	164.96	1		1	1	1	1	31501000	0	27634000	93219000	97212000	29014000
ADDELTPR	8	0	915.43	AT5G11540.1	AT5G11540.1	456	463	yes	yes	2	0.012345	119.17	1	1	1	1			12466000	16870000	15035000	7074500	0	0
ADEPVFVDFWAPWCGPCK	18	0	2179.95	AT1G03680.1	AT1G03680.1	91	108	yes	yes	2	1.3205e-64	229.97	1	1	1	1	1	1	35994000	19003000	34029000	72864000	63073000	59233000
ADEVVALLSK	10	0	1043.59	AT4G20830.2;AT4G20830.1	AT4G20830.2	321	330	yes	no	2	1.5983e-06	150.35	1	1	1	1	1	1	1064500000	1442900000	1146900000	1953100000	1770700000	1946600000
ADFSPVYDVGLLR	13	0	1450.75	AT3G55430.1	AT3G55430.1	333	345	yes	yes	2	7.9323e-06	133.89	1	1	1	1	1	1	130390000	104580000	137820000	103920000	88481000	94572000
ADGFDLK	7	0	764.37	AT4G33010.1;AT4G33010.2;AT2G26080.1	AT4G33010.1	257	263	no	no	2	0.059957	92.822	1	1	1	1	1	1	129440000	166840000	147630000	176090000	214570000	149060000
ADGLGVSSCIER	12	0	1262.59	AT5G46290.2;AT5G46290.1;AT5G46290.3	AT5G46290.2	280	291	yes	no	2	7.7237e-10	160.77	1	1	1	1	1	1	57592000	39208000	0	65992000	61590000	163970000
ADGSDPLEEYCK	12	0	1382.57	AT3G62410.1	AT3G62410.1	107	118	yes	yes	2	0.0036582	101.38	1	1	1		1	1	0	0	0	0	0	17191000
ADILQALEAI	10	0	1055.59	AT3G01120.1	AT3G01120.1	554	563	yes	yes	2	0.02109	88.948	1	1	1	1	1	1	10109000	6597100	7571100	8090600	5640800	8913500
ADLIAYLK	8	0	905.522	AT1G22840.1	AT1G22840.1	101	108	no	no	2	0.051696	89.55	1	1	1		1	1	8061200	10835000	13029000	0	11081000	8023800
ADLLFVDSPVGAGYSFVEGNQK	22	0	2312.13	AT2G27920.1;AT2G27920.2	AT2G27920.1	106	127	yes	no	2;3	7.2459e-33	264.97	2	2	2	2	2	2	209770000	169060000	178710000	235990000	203880000	194440000
ADLNVPLDDNQTITDDTR	18	0	2014.94	AT3G12780.1	AT3G12780.1	99	116	yes	yes	2;3	7.7835e-39	202.13	1	1	1	2	2	2	93518000	143790000	103910000	245390000	259510000	239820000
ADLVNNLGTIAR	12	0	1255.69	AT5G56030.1;AT5G56010.1;AT5G56000.1;AT5G56030.2;AT5G52640.1	AT5G56030.1	88	99	yes	no	2	0.0053469	91.752	1	1	1	1	1		23201000	23416000	23679000	20267000	17179000	0
ADMILPISR	9	0	1014.55	AT3G14920.1	AT3G14920.1	215	223	yes	yes	2	0.0016962	133.98	2	2	2	2	2	2	146690000	160720000	167730000	145820000	167850000	197730000
ADNLAAQR	8	0	857.436	AT3G18080.1	AT3G18080.1	287	294	yes	yes	2	0.036847	95.541		1	1	1	1	1	0	137130000	154000000	81580000	74163000	88749000
ADQLTDDQISEFK	13	0	1508.7	AT5G21274.1;AT3G56800.1;AT3G43810.1;AT2G41110.1;AT2G27030.1;AT2G27030.3;AT3G43810.2;AT2G41110.2	AT5G21274.1	2	14	yes	no	2	9.1843e-35	214.64	1	1	1	1	1	1	733120000	1096200000	745100000	598070000	510660000	442490000
ADQLTDEQISEFK	13	0	1522.72	AT5G37780.1;AT1G66410.1;AT1G66410.2;AT5G37780.2;AT5G37780.3	AT5G37780.1	2	14	yes	no	2	1.4145e-55	250.7	1	1	1	1	1	1	256540000	393710000	293050000	227400000	243120000	225370000
ADVAEVCIQALLFEEAK	17	0	1904.96	AT5G02240.1	AT5G02240.1	206	222	yes	yes	2;3	1.735e-05	140.08	1		1	1	1	1	7279600	0	2878900	10289000	10217000	3315700
ADVIEPSWTDPQK	13	0	1484.71	AT1G55120.4;AT1G55120.2;AT1G55120.3;AT1G55120.1	AT1G55120.4	374	386	yes	no	2	0.014945	73.781	1	1		1	1	1	36416000	26510000	0	35845000	28745000	25882000
ADVIEPSWTDPQLICSK	17	0	1957.95	AT3G13790.2;AT3G13790.1;AT3G13790.5;AT3G13790.4;AT3G13790.3	AT3G13790.2	425	441	yes	no	2	0.00077828	138.42	1	1	1			1	103910000	63498000	72459000	0	0	36602000
ADWHSCLDNR	10	0	1272.53	AT4G35830.1;AT4G35830.2	AT4G35830.1	391	400	yes	no	2;3	0.0065317	110.76	2	2	2	2	1	1	17245000	28560000	22458000	5809400	8941000	10034000
ADYDACNTK	9	0	1056.42	AT4G27520.1	AT4G27520.1	79	87	yes	yes	2	2.3501e-05	160.26	1	1	1	1	1	1	44153000	81054000	76189000	48235000	55863000	65325000
ADYFPYGIDFGGPTGR	16	0	1731.79	AT1G29660.1	AT1G29660.1	55	70	yes	yes	2	4.0285e-27	191.23	1	1	1	1	1	1	983070000	1033400000	1078500000	1189200000	1296700000	1342600000
AEASDLLEWPK	11	0	1257.62	AT1G11840.4;AT1G11840.3;AT1G11840.2;AT1G11840.1;AT1G11840.5	AT1G11840.4	2	12	yes	no	2	1.1528e-20	204.52	1	1	1	1	1	1	35749000	45107000	35423000	30912000	33734000	34339000
AEASSLVGK	9	0	860.46	AT1G70890.1	AT1G70890.1	2	10	yes	yes	2	0.0052601	103.74	1	1		1	1		166440000	227550000	0	200910000	187780000	0
AEATDVANAVLDGSDAILLGAETLR	25	0	2484.27	AT3G52990.2;AT3G52990.1;AT2G36580.1	AT3G52990.2	275	299	yes	no	3	7.7884e-22	164.06	1	1		1	1	1	12112000	7843700	0	11753000	14436000	9200700
AEAVEGAATSDDDLK	15	0	1490.67	AT1G75950.1	AT1G75950.1	70	84	yes	yes	2	0.00031481	128.85	1	1	1	1	1		18253000	20082000	7139400	6881300	14604000	0
AEDLDLFQFNEGEYELAAQLHSR	23	0	2694.26	AT3G46970.1	AT3G46970.1	254	276	yes	yes	3	8.8071e-10	88.222				1	1		0	0	0	11919000	14167000	0
AEDSPAVTSTPLVVTEHPVEPTTELPVEHPEEK	33	0	3563.75	AT1G20440.1	AT1G20440.1	202	234	yes	yes	3;4	3.9414e-109	252.28	2	2	2	2	2	2	325200000	353090000	330960000	164490000	133300000	157170000
AEDWLNPDVVLEAFEAR	17	0	1972.95	AT4G16760.1;AT4G16760.2	AT4G16760.1	474	490	yes	no	2	0.012896	78.763				1		1	0	0	0	11435000	0	8515200
AEEAINHLGADSFLVTTDPQK	21	0	2255.11	AT4G39330.1;AT4G39330.2	AT4G39330.1	220	240	yes	no	3	1.5482e-06	85.062	1	1	1	1		1	57838000	51310000	58673000	31833000	0	34944000
AEEDFVAEAGWER	13	0	1507.66	AT3G56060.1	AT3G56060.1	135	147	yes	yes	2	0.00056721	104.43	1	1	1		1	1	29558000	0	30812000	0	16206000	30211000
AEEDGVACVEFIAGK	15	0	1593.73	AT1G48030.5;AT1G48030.4;AT1G48030.3;AT1G48030.2;AT1G48030.1;AT3G17240.3;AT3G17240.1	AT1G48030.5	365	379	no	no	2	0.00059965	150.06	1	1	1	1	1	1	135150000	69325000	111100000	177770000	129880000	139960000
AEEGHSLGLIDAVVPPAELVTTAR	24	0	2444.29	AT3G06860.1	AT3G06860.1	175	198	yes	yes	3	1.7605e-05	69.72	1		1		1	1	12475000	0	17803000	0	19987000	20201000
AEEILAK	7	0	772.433	AT4G14880.5;AT4G14880.4;AT4G14880.3;AT4G14880.2;AT4G14880.1;AT3G22460.2;AT3G22460.1	AT4G14880.5	132	138	yes	no	2	0.043774	100.74	1	1	1	1	1	1	392010000	394910000	369950000	230430000	252060000	239760000
AEEKPTVESVVEEETK	16	1	1802.88	AT3G05900.1;AT3G05900.2	AT3G05900.1	179	194	yes	no	2;3	6.7429e-11	130.1	2	1	2	1	2	2	69055000	62847000	81662000	26932000	60420000	36792000
AEEKPTVESVVEEETKDR	18	2	2074.01	AT3G05900.1;AT3G05900.2	AT3G05900.1	179	196	yes	no	3	1.4095e-65	218.79	1	1	1	1	1	1	40267000	43965000	38702000	32919000	24957000	30155000
AEELVVVNPTK	11	0	1197.66	AT1G31690.1	AT1G31690.1	528	538	yes	yes	1;2	1.6338e-07	183.67	2	2	2	2	2	2	1109400000	1055400000	832970000	732410000	786750000	713720000
AEELVVVNPTKK	12	1	1325.76	AT1G31690.1	AT1G31690.1	528	539	yes	yes	2;3	0.0013942	125.75	1	1	1	1	1	2	36385000	37199000	42897000	30436000	38557000	36003000
AEEPAKTEEPAK	12	1	1298.64	AT4G20260.9;AT4G20260.8;AT4G20260.7;AT4G20260.3;AT4G20260.2;AT4G20260.10;AT4G20260.1;AT4G20260.4	AT4G20260.9	146	157	yes	no	2;3	2.5745e-93	279.49	2	2	2	2	2	2	297140000	302050000	319480000	255990000	317940000	258250000
AEESTETVK	9	0	992.466	AT3G05900.1;AT3G05900.2	AT3G05900.1	84	92	yes	no	2	0.0095504	111.74	1	1	1	1	1	1	41320000	66689000	51001000	25002000	34129000	33069000
AEETAEATEQAK	12	0	1276.58	AT3G05900.1;AT3G05900.2	AT3G05900.1	270	281	yes	no	2	2.162e-33	213.31	1	1	1	1	1	1	53046000	62000000	55793000	24727000	27437000	28535000
AEEVVALLGK	10	0	1027.59	AT4G20840.1	AT4G20840.1	320	329	yes	yes	1;2	0.0018234	129.42	2	2	2	2	2	2	374490000	325780000	277080000	475120000	498660000	459670000
AEFGSITWSNPQHEVR	16	0	1856.88	AT2G05920.1	AT2G05920.1	729	744	yes	yes	2;3	7.0496e-49	269.81	2	2	2	1	1	1	98027000	181480000	212250000	94094000	102490000	0
AEGGFLGADVILQQLK	16	0	1657.9	AT1G11860.1;AT1G11860.2;AT1G11860.3	AT1G11860.1	303	318	yes	no	2;3	1.1633e-61	295.37	2	2	2	2	2	2	301720000	205020000	243210000	299190000	346810000	297680000
AEGLVLK	7	0	728.443	AT1G18080.1;AT3G18130.1;AT1G48630.1	AT1G18080.1	2	8	yes	no	1	0.022267	81.784			1	1	1	1	0	0	75652000	63482000	65396000	59573000
AEKDHEDNLSLAGDGFDTVIK	21	1	2273.08	AT4G37530.1;AT4G37530.2	AT4G37530.1	88	108	yes	no	2;3;4	9.1325e-110	311.09	2	2	3	3	3	3	269540000	321980000	409340000	519980000	484540000	427360000
AEKDHEENLSLAGDGFDTVIK	21	1	2287.1	AT4G37520.1;AT4G37520.2	AT4G37520.1	88	108	yes	no	3;4	1.1606e-05	100.28	2	2	2	2	2	1	72071000	91631000	66022000	88823000	88667000	64599000
AEKEEVK	7	1	831.434	AT2G29450.1	AT2G29450.1	2	8	yes	yes	2	0.052074	53.968	1		1				0	0	11908000	0	0	0
AEMYTGDEICR	11	0	1343.55	AT1G09310.1	AT1G09310.1	12	22	yes	yes	2	7.1355e-12	182.65	1	1	1		1	1	99173000	86686000	80891000	0	30828000	64641000
AENPEFR	7	0	861.398	AT5G35590.1	AT5G35590.1	222	228	yes	yes	2	0.0067614	139.92	1	1	1	1	1	1	10909000	19530000	15069000	13826000	13920000	8947300
AEQALLSGCSAGGLASILHCDQFK	24	0	2532.21	AT2G46930.1	AT2G46930.1	189	212	yes	yes	2;3	1.9817e-105	319.09	2	2	1	2	2	2	214890000	163360000	216230000	351100000	420340000	362080000
AERPELLTVILPQSLK	16	1	1806.06	AT2G43945.1;AT3G59870.1	AT2G43945.1	198	213	yes	no	2;3	6.7727e-12	133.16	2	2	2	2	2	2	31583000	32546000	31562000	24183000	38276000	34519000
AESLSGGR	8	0	775.382	AT3G07390.1	AT3G07390.1	156	163	yes	yes	2	1.6934e-07	189.62	1	1	1	1	1	1	331980000	529620000	341010000	628480000	677670000	415280000
AETEDKESEVK	11	1	1263.58	AT4G26630.2;AT4G26630.1	AT4G26630.2	65	75	yes	no	2;3	3.9358e-08	164.66	2	1	2	2	2	2	18860000	22332000	22018000	16944000	18378000	25219000
AETPAGYPCIR	11	0	1233.58	AT1G72610.1	AT1G72610.1	30	40	yes	yes	2	0.00010429	137	1	1	1	1	1	1	1149400000	1512800000	1171500000	605330000	647820000	629050000
AETPAGYPCIRPIHVK	16	1	1807.94	AT1G72610.1	AT1G72610.1	30	45	yes	yes	2;3	8.609e-08	191.53	2	2	2	2	2	2	294330000	317020000	306620000	140920000	151480000	165850000
AEVDGSSEYNDFQR	14	0	1615.67	AT1G13750.1	AT1G13750.1	299	312	yes	yes	2	1.0726e-62	242.88	1	1	1	1	1	1	29682000	46927000	31768000	0	34660000	41510000
AEVTTEK	7	0	776.392	AT1G72150.1	AT1G72150.1	186	192	yes	yes	2	0.015977	121.29	1	1	1	1	1	1	9889400	10057000	13824000	21092000	23420000	13899000
AFADASMNTAYEK	13	0	1417.62	AT1G65930.1	AT1G65930.1	191	203	yes	yes	2	0.040929	65.395	1	1	1	1			53502000	39752000	39577000	32102000	0	0
AFATANNYPESTK	13	0	1412.66	AT4G09670.1	AT4G09670.1	46	58	yes	yes	2	2.4942e-05	119.53	1	1	1	1	2	1	32624000	32289000	29440000	0	0	21418000
AFDDAIHDGVDVLSVSIGGGIPEDSEVDK	29	0	2955.4	AT4G21650.1	AT4G21650.1	303	331	yes	yes	3	8.2019e-08	81.406	1						15118000	0	0	0	0	0
AFDLGSKPEGTSTPTK	16	1	1634.82	AT5G02240.1	AT5G02240.1	225	240	yes	yes	2;3	3.7032e-47	264.28	2	2	2	3	1	2	86080000	115980000	87433000	121230000	48365000	77024000
AFDLLHEGTCLR	12	0	1430.7	AT5G43940.1;AT5G43940.2	AT5G43940.1	361	372	yes	no	2	6.1419e-06	141.88	1		1	1		1	99055000	0	63037000	79035000	0	73325000
AFDPVETIK	9	0	1018.53	AT3G01500.4;AT3G01500.1;AT3G01500.3;AT3G01500.2	AT3G01500.4	48	56	yes	no	1;2	7.9249e-05	164.71	2	2	2	2	2	2	1994000000	2383300000	2004000000	2146100000	2114500000	1888500000
AFDVTAEIIGNVTDSPLIEVK	21	0	2230.17	AT1G74260.1	AT1G74260.1	1050	1070	yes	yes	3	0.0062719	48.244	1	1	1			1	102960000	127970000	127660000	0	0	38790000
AFFQEFTHLDAK	12	0	1452.7	AT5G60160.1	AT5G60160.1	461	472	yes	yes	3	4.6491e-07	107.97	1	1	1	1		1	6510000	6260000	9928800	12950000	0	10557000
AFFTTISPR	9	0	1038.55	AT2G37720.1	AT2G37720.1	379	387	yes	yes	2	0.0071856	121.85	1		1	1	1	1	21932000	0	23168000	35627000	31266000	38197000
AFGAELVLTEPAK	13	0	1344.73	AT2G43750.2;AT2G43750.1	AT2G43750.2	181	193	yes	no	2	1.6009e-06	174.98	1	1	1	1	1	1	76134000	64087000	60612000	77720000	60104000	74295000
AFGGSSIVDGQVELMLHR	18	0	1914.96	AT5G13980.1;AT5G13980.2;AT5G13980.3	AT5G13980.1	791	808	yes	no	2;3	1.3029e-51	165.58	2	2	2	2	2	3	79167000	65643000	82144000	88741000	99588000	106680000
AFGLQVSAAGYDR	13	0	1353.67	AT4G16155.1	AT4G16155.1	151	163	yes	yes	2	0.00063611	97.813				1		2	0	0	0	24640000	0	0
AFLDGHPLPEEF	12	0	1370.65	AT1G28110.2;AT1G28110.1	AT1G28110.2	450	461	yes	no	2	0.0006131	111.95	1	1					10136000	7684100	0	0	0	0
AFLETLDGSCR	11	0	1267.59	AT5G08280.1	AT5G08280.1	307	317	yes	yes	2	0.0042996	109.66		1	1	1		1	0	0	23738000	0	0	31511000
AFNSAIDR	8	0	892.44	AT5G41870.1	AT5G41870.1	63	70	yes	yes	2	0.0048389	137.18	1	1	1	1	1	1	0	67859000	43063000	59814000	63607000	65224000
AFPELGLTQK	10	0	1102.6	AT5G44380.1;AT5G44380.2	AT5G44380.1	334	343	yes	no	2	0.058137	72.879			1	1	1	1	0	0	14342000	8857700	15348000	10958000
AFQDLIVEGK	10	0	1118.6	AT1G04420.1	AT1G04420.1	219	228	yes	yes	2	0.019972	90.15	1		1	1			48799000	0	92437000	34213000	0	0
AFQLDVNVVK	10	0	1131.63	AT3G05950.1	AT3G05950.1	206	215	yes	yes	2	0.00014323	143.01	1	1	1	1	1	1	47425000	38767000	58099000	109710000	112560000	103750000
AFSDILK	7	0	792.438	AT4G12730.1	AT4G12730.1	202	208	yes	yes	2	0.055532	94.401	1	1	1	1	1	1	269420000	268250000	195530000	246540000	212080000	188270000
AFSEDTTK	8	0	897.408	AT5G04140.1;AT5G04140.2	AT5G04140.1	882	889	yes	no	2	0.017546	111.01	1	2	1	1	1	2	85810000	108650000	97761000	108640000	100340000	88646000
AFSEVEATEEATEAKEEEEVSPAAEASAEEAKPK	34	2	3592.64	AT3G57410.9;AT3G57410.8;AT3G57410.7;AT3G57410.5;AT3G57410.4;AT3G57410.3;AT3G57410.2;AT3G57410.1	AT3G57410.9	860	893	yes	no	4	0.00084025	43.579	1				1		39791000	0	0	0	22917000	0
AFSNMAVGYNNVDVEAANK	19	0	2012.93	AT1G68010.1;AT1G68010.2;AT1G68010.3	AT1G68010.1	89	107	yes	no	2	6.5703e-14	163.27				1	1	1	0	0	0	23791000	22986000	47653000
AFTDAHNK	8	0	902.425	AT5G66590.1	AT5G66590.1	48	55	yes	yes	2	0.0017323	158.03	1			1	1	1	80632000	0	0	34962000	37566000	43784000
AFTFGCVNK	9	0	1042.49	AT5G07030.1	AT5G07030.1	215	223	yes	yes	2	8.5983e-05	154.35	1	1	1	1			84215000	93617000	64920000	0	0	0
AFTSEFIR	8	0	969.492	AT1G03230.1	AT1G03230.1	305	312	yes	yes	2	0.0030342	145.04	1	1	1	1	1	1	83375000	125150000	117870000	58652000	58765000	55814000
AFVSEYAVTGK	11	0	1170.59	AT3G10740.3;AT3G10740.1;AT3G10740.4;AT3G10740.2	AT3G10740.3	461	471	yes	no	2	0.00031137	152.28	1	1	1	1	1	1	1729900000	2056300000	1557000000	1415100000	1379600000	1274300000
AFVTTAEVCDANQELIR	17	0	1935.94	AT5G16450.2;AT5G16450.1	AT5G16450.2	2	18	yes	no	2	4.2289e-154	312.85	1	1	1	1	1	1	23957000	14803000	17368000	29270000	25888000	0
AFVVHELK	8	0	941.533	AT2G28190.1	AT2G28190.1	178	185	yes	yes	2	0.0042653	139.68	1	1	1	1	1	1	116370000	127060000	109710000	105980000	112620000	88249000
AFVVHELKDDLGK	13	1	1469.79	AT2G28190.1	AT2G28190.1	178	190	yes	yes	3	5.909e-05	96.734	1	1	1		1		63796000	60602000	0	0	55345000	0
AFYGDDYYICR	11	0	1441.6	AT2G26740.1;AT4G15955.1;AT4G15955.2;AT4G15955.3	AT2G26740.1	147	157	yes	no	2	0.0040007	105.78	1	1	1	1			14911000	19522000	18611000	18990000	0	0
AGADIVSVHCEQQSTIHLHR	20	0	2257.1	AT5G61410.2;AT5G61410.1	AT5G61410.2	137	156	yes	no	3;4	1.9942e-117	240.21	2	2	2	2	2	2	164440000	160170000	212120000	150710000	169050000	184610000
AGAEVIGISGDDSASHK	17	0	1612.77	AT3G26060.3;AT3G26060.1;AT3G26060.2	AT3G26060.3	66	82	yes	no	3	0.0092316	42.068						1	0	0	0	0	0	333920000
AGAFTCLLDETGR	13	0	1409.66	AT2G33255.1	AT2G33255.1	198	210	yes	yes	2	9.545e-05	115.7	1		1		1	1	17200000	0	17608000	0	22107000	0
AGAVVSGIPLYK	12	0	1173.68	AT2G36530.1;AT2G36530.2	AT2G36530.1	126	137	yes	no	2	0.01586	96.331	1	1	1	1	1	1	81859000	58426000	55806000	92307000	63085000	64304000
AGCYASNVVIQR	12	0	1336.66	AT3G09820.1;AT3G09820.2;AT5G03300.1;AT5G03300.3;AT5G03300.2	AT3G09820.1	321	332	no	no	2	0.00049624	114.89	1		1	1	1	1	146570000	0	128930000	176590000	186710000	119120000
AGDGSFSLK	9	0	880.429	AT3G54660.1	AT3G54660.1	330	338	yes	yes	2	0.016417	101.54	1	1	1	1	1	1	14539000	22771000	20281000	19712000	21350000	23620000
AGDVLVFNYNPR	12	0	1363.69	AT2G02850.1	AT2G02850.1	59	70	yes	yes	2	2.3517e-08	175.51	1	1	1	1	1	1	200720000	238700000	224680000	439330000	395060000	487230000
AGDVYGNYVLQFADDFSYTDPVDGSVASK	29	0	3099.4	AT5G51820.1	AT5G51820.1	520	548	yes	yes	3	5.7083e-06	65.171			1		1		0	0	13747000	0	16468000	0
AGEDAETLGLTGHER	15	0	1554.73	AT4G26970.1	AT4G26970.1	922	936	yes	yes	2	0.0065997	74.76	1		1			2	12129000	0	19376000	0	0	11481000
AGEGEVIACHTLEVWNEK	18	0	2040.96	AT1G45145.1	AT1G45145.1	2	19	yes	yes	2;3	1.2569e-186	320.57	2	2	2	2	2	2	69857000	47645000	48572000	54335000	73617000	67758000
AGGFPEPEIVHYNPK	15	0	1653.82	AT1G09340.1;AT1G09340.2	AT1G09340.1	291	305	yes	no	2;3	0.00071673	147.91	1	1	1	2	2	2	71180000	79642000	106150000	337460000	362050000	326300000
AGGGSLEIVVSESGWPTAGGAATGVDNAR	29	0	2685.3	AT3G57240.1	AT3G57240.1	253	281	yes	yes	2;3	1.0155e-55	278.27	2	1	2	1	2	2	103090000	44508000	122190000	72985000	140180000	151530000
AGGSDPLEEYCNDNPETDECR	21	0	2426.92	AT2G47400.1	AT2G47400.1	100	120	yes	yes	2;3	1.1021e-157	365.46	1	2	2	2	1	2	102560000	228330000	143720000	114340000	93521000	119900000
AGHPEWDLPEDAGEYNDKPEETGFFK	26	1	2977.3	AT4G15210.4;AT4G15210.3;AT4G15210.1;AT4G15210.2	AT4G15210.4	174	199	yes	no	3	9.6554e-17	124		1	1	1		1	0	30384000	33164000	39987000	0	36646000
AGIALSDK	8	0	773.428	AT1G13440.1;AT1G13440.2;AT3G04120.1	AT3G04120.1	303	310	no	no	1;2	0.017031	111.82	2	1	2	2	2	1	75030000	49747000	52264000	66579000	67182000	54286000
AGIFVVQAAGNTGPAPK	17	0	1596.86	AT1G30600.1	AT1G30600.1	344	360	no	no	2	1.5712e-05	174.84	1		1	1	1	1	19990000	0	23028000	46878000	42754000	35547000
AGIFVVQAAGNTGPSPK	17	0	1612.86	AT4G20430.2;AT4G20430.3;AT4G20430.1	AT4G20430.2	366	382	yes	no	2	0.00091067	135.6	1					1	39926000	0	0	0	0	33878000
AGISNLTGVQGAVNIQGEDQK	21	0	2098.07	AT3G54050.2;AT3G54050.1	AT3G54050.2	121	141	yes	no	2;3	6.3913e-250	352.72	1	1	1	1	2	1	238600000	182540000	171580000	264650000	295010000	212870000
AGIVPVSFR	9	0	944.544	AT2G40610.1;AT2G28950.1	AT2G40610.1	143	151	yes	no	2	7.0489e-05	155.82	1	1	1	1	1	1	735370000	985700000	811320000	847990000	819300000	1041200000
AGIVWYDNCLVK	12	0	1436.71	AT3G22060.1	AT3G22060.1	119	130	yes	yes	2	1.7952e-08	152.11	2	1	1	1	1	2	748600000	660090000	742700000	857950000	772680000	776320000
AGLDLDCGPFLAIFTEGAVK	20	0	2093.05	AT5G49360.1	AT5G49360.1	323	342	yes	yes	2;3	3.1105e-249	344.48	3	1	3	2	2	3	2412400000	736400000	3358700000	3683500000	4011200000	4370400000
AGLNMNCGDFLGK	13	0	1395.63	AT3G19620.1	AT3G19620.1	318	330	yes	yes	2	1.489e-34	219.5	2	2	2	2	2	2	688960000	639640000	721760000	694120000	735030000	832000000
AGLQNQVK	8	0	856.477	AT5G58090.1	AT5G58090.1	145	152	yes	yes	2	0.010143	122.98		1	1	1	1	1	0	34424000	26065000	39165000	44227000	37827000
AGLVISLASIFDMDMNR	17	0	1851.92	AT1G31690.1	AT1G31690.1	275	291	yes	yes	2	0.00068407	101.39	1	1	1	1	1	1	13278000	9839400	23976000	17371000	19966000	10256000
AGMDVNCGSYLQK	13	0	1441.63	AT1G78060.1	AT1G78060.1	319	331	yes	yes	2	2.7284e-34	213.81	2	2	2	2	2	2	153160000	168170000	137010000	133210000	141360000	214390000
AGNLFNIEYIIDWSEAGDNVEK	22	0	2496.18	AT1G30720.1	AT1G30720.1	424	445	yes	yes	2;3	6.6925e-44	165.34	1			1	1	2	17174000	0	0	22226000	21560000	14601000
AGNPGVPTASEWIADVLAPGGR	22	0	2134.08	AT3G05350.1	AT3G05350.1	165	186	yes	yes	3	0.06422	12.898	1	1			1		5968000	5744400	0	0	9866600	0
AGQLALK	7	0	699.428	AT5G54770.1	AT5G54770.1	310	316	yes	yes	2	0.015497	121.68	1	1	1	1	1	1	36180000	23776000	23614000	24445000	20062000	26812000
AGQVVEGK	8	0	786.424	AT3G16460.2;AT3G16460.1	AT3G16460.2	604	611	yes	no	2	0.031842	98.997	1		1	1	1	1	3110900	0	3790400	1750300	1750500	2108900
AGRPIPVPNSGIQISQLGHVK	21	1	2167.22	AT1G09340.1;AT1G09340.2	AT1G09340.1	231	251	yes	no	3;4	3.9852e-06	111.4		2		2		2	0	42242000	0	92194000	0	69649000
AGSGVATLGLPDSPGVPK	18	0	1621.87	AT3G48730.1;AT5G63570.1;AT5G63570.2	AT3G48730.1	200	217	no	no	2	0.00039867	120.87	1	1	1	1	1	1	207350000	235730000	204040000	234670000	244250000	248930000
AGSLEGLEFDFK	12	0	1311.63	AT5G14200.1;AT5G14200.3;AT5G14200.2	AT5G14200.1	72	83	yes	no	2	6.9707e-20	160.53	1	1	2	1	1	1	48778000	25470000	0	0	0	53642000
AGSLFIVPR	9	0	958.56	AT1G07750.1	AT1G07750.1	275	283	yes	yes	2	0.053444	81.215		1	1			1	0	16087000	10226000	0	0	15095000
AGSTSCGTCFSPPR	14	0	1483.62	AT1G03220.1	AT1G03220.1	94	107	yes	yes	2	2.5704e-19	183.33	1	1	1	1	1	1	179870000	278320000	196230000	178350000	166040000	182500000
AGTDSIISAR	10	0	989.514	AT4G39730.1;AT2G22170.1	AT4G39730.1	43	52	yes	no	2	7.1427e-07	156.35	1	1	1	1	1	1	34478000	46204000	27546000	36000000	31611000	31581000
AGTPSLNYDVVHSDNVGSR	19	0	1986.94	AT1G21670.1	AT1G21670.1	109	127	yes	yes	2;3	7.0642e-52	191.99	2	2	2	2	2	2	3174400000	3833500000	2758900000	3806900000	3723800000	4201600000
AGTSEDFTNSVSNPDNIK	18	0	1894.85	AT1G74000.1	AT1G74000.1	238	255	yes	yes	2	0.036168	68.034	1	1	1				22717000	26316000	25504000	0	0	0
AGVDFFTQIK	10	0	1124.59	AT2G14170.2;AT2G14170.1	AT2G14170.2	466	475	yes	no	2	0.006503	110.87	2	1	1	1	1	1	6548500	9061200	6116100	7451000	0	13255000
AGVPVFVYSGDQDSVIPLTGSR	22	0	2263.15	AT2G33530.1	AT2G33530.1	369	390	yes	yes	2;3	7.8459e-17	165.34	2	2	2	1		2	51602000	58068000	51743000	8162500	0	22863000
AGYAPSHWVGPGR	13	0	1353.66	AT2G15220.1	AT2G15220.1	150	162	yes	yes	3	0.052553	41.644				1		1	0	0	0	23922000	0	18756000
AGYDGCDASSSTENHSDGDTK	21	0	2172.81	AT2G44790.1	AT2G44790.1	73	93	yes	yes	3	7.2368e-33	190.37	1	1	1	1	1	1	184350000	312070000	262230000	218950000	227920000	136350000
AGYIIPVEITVFDDK	15	0	1678.88	AT1G32990.1	AT1G32990.1	119	133	yes	yes	2	0.0010831	108.37	1	1	1	1		1	9032300	10209000	13042000	9772900	0	9841400
AGYWVQTGIGK	11	0	1178.61	AT5G03350.1	AT5G03350.1	176	186	yes	yes	2	0.0012083	149.82		1	1	1	1	1	0	260310000	260840000	114340000	110610000	109650000
AGYWVQTLVGK	11	0	1220.66	AT3G15356.1	AT3G15356.1	176	186	yes	yes	2	0.0001039	137.05	1	1	1	1	1	1	378320000	355550000	368380000	458690000	488230000	458500000
AGYWVQTR	8	0	979.488	AT3G16530.1	AT3G16530.1	176	183	yes	yes	2	7.7865e-19	224.39	1	1	1	1	1	1	850140000	1342000000	918270000	988300000	1192800000	1184700000
AHAESVNLQFENPLDENTAR	20	0	2254.06	AT1G14810.1	AT1G14810.1	282	301	yes	yes	3	2.7672e-12	158.58		1	1				0	18118000	22906000	0	0	0
AHASTEGVAK	10	0	969.488	AT1G79550.2;AT1G79550.1	AT1G79550.2	156	165	yes	no	2	7.7739e-12	185.72	1	1	1	1	1	1	32631000	30240000	29041000	11920000	15320000	36556000
AHASTEGVTK	10	0	999.499	AT3G12780.1	AT3G12780.1	231	240	no	no	2	2.7413e-05	147.2	1	1	1	1	1	1	38044000	44760000	27578000	29783000	31088000	38081000
AHGTAVGLPSEDDMGNSEVGHNALGAGR	28	0	2718.24	AT3G08590.2;AT3G08590.1;AT1G09780.1	AT3G08590.2	66	93	no	no	3	1.076e-11	98.019			1		1		0	0	29251000	0	0	0
AHGYGSEPYDDNK	13	0	1451.6	AT4G29260.1	AT4G29260.1	123	135	yes	yes	2	1.4283e-27	210.08	1	1	1	1	1	1	18776000	23815000	12525000	12479000	11002000	11274000
AHLLFDFHQEVDGLR	15	0	1795.9	AT3G57610.1	AT3G57610.1	169	183	yes	yes	3	4.2402e-06	142.97	1	1	1	1	1	1	29028000	18356000	24520000	36056000	41901000	31076000
AHLQCGPGQK	10	0	1094.53	AT3G13750.1	AT3G13750.1	767	776	yes	yes	2;3	1.4629e-35	231.29	2	2	2	2	2	2	238380000	286900000	270260000	390880000	344260000	317720000
AHLVNDVEDVEK	12	0	1366.67	AT5G09650.1	AT5G09650.1	223	234	yes	yes	2;3	1.8242e-95	288.49	2	2	2	1	1	2	565800000	629600000	609960000	440570000	375430000	471510000
AHQEGGFFAETFR	13	0	1495.68	AT1G19130.1	AT1G19130.1	19	31	yes	yes	2	1.0651e-13	172.13		1	1	1	1		0	0	19091000	0	39593000	0
AHQEHGNTLAALR	13	0	1416.72	AT2G44570.1;AT2G44570.2	AT2G44570.1	114	126	yes	no	3	0.00025396	78.814		1		1		1	0	0	0	13238000	0	16493000
AHTDMVTAIATPIDNADIIVSASR	24	0	2481.25	AT1G18080.1	AT1G18080.1	13	36	yes	yes	3	3.3836e-10	122.3	1		1				17052000	0	15710000	0	0	0
AHTLGLTQPNSTEPHK	16	0	1729.87	AT2G24200.1;AT2G24200.2;AT2G24200.3	AT2G24200.1	2	17	yes	no	2;3	7.0065e-176	284.15	1	1	1	1	1	2	64211000	76664000	59682000	83810000	74857000	62337000
AHTSESVNPR	10	0	1096.53	AT5G48230.2	AT5G48230.2	2	11	yes	yes	2	2.2611e-46	241.94	1	1	1	1	1	1	15264000	12793000	13066000	18373000	18837000	20582000
AIAAAEAEK	9	0	872.46	AT1G17290.1;AT5G62390.1	AT1G17290.1	470	478	yes	no	2	0.038311	87.181				1	1		0	0	0	17793000	20163000	0
AIADNVNVLSMSLGGGMSDYYR	22	0	2332.08	AT5G67360.1	AT5G67360.1	270	291	yes	yes	2	9.836e-138	290.32	1	1	1	2	1	1	20608000	11814000	16643000	18829000	15844000	28728000
AIALTVDTPR	10	0	1055.6	AT3G14415.1;AT3G14415.3;AT3G14415.2;AT3G14420.3;AT3G14420.2;AT3G14420.1;AT3G14420.4;AT3G14420.5;AT3G14420.6;AT4G18360.4;AT4G18360.1;AT4G18360.2;AT4G18360.3	AT3G14420.3	151	160	no	no	2	1.1967e-06	153.08	1	1	1	1	1	1	55264000	55370000	57031000	64119000	67588000	55090000
AIASISEEFLV	11	0	1177.62	AT5G45950.1	AT5G45950.1	347	357	yes	yes	2	0.0019815	116.54	1	1	1	1	1	1	13568000	8685500	10065000	7414700	7562600	4459600
AICIVHNETATGVTNDISAVR	21	0	2240.12	AT2G13360.3;AT2G13360.2;AT2G13360.1	AT2G13360.3	140	160	yes	no	3	8.4988e-118	270	1	1	1	1	1	1	275810000	290190000	350660000	439280000	428840000	387440000
AIDCPYPCDK	10	0	1237.51	AT2G46930.1	AT2G46930.1	399	408	yes	yes	2	0.001389	131.11	1	1	1	1	1	1	258220000	311890000	254530000	323380000	329840000	373140000
AIDVPFGR	8	0	873.471	AT2G06850.1	AT2G06850.1	30	37	yes	yes	2	0.0022141	150.02	1	1	1	1	1	1	623030000	551680000	473850000	203980000	175080000	157950000
AIEEGTDFIETDILSSK	17	0	1866.91	AT1G74210.1	AT1G74210.1	67	83	yes	yes	2;3	6.311e-38	208.82	1	2	2	2	2	2	161420000	143700000	169780000	184570000	181720000	187180000
AIELVAGK	8	0	799.48	AT5G25460.1	AT5G25460.1	257	264	yes	yes	2	0.045856	91.906	1	1	1	1	1	1	862950000	854050000	793470000	450070000	563880000	364210000
AIETYIFAMFDENK	14	0	1690.79	AT3G57260.1;AT3G57260.2	AT3G57260.1	301	314	yes	no	2	1.1503e-08	158.05	1	1	1	1	1	1	8083900	3113400	7403200	12641000	12247000	12555000
AIETYIFAMFDENKK	15	1	1818.89	AT3G57260.1;AT3G57260.2	AT3G57260.1	301	315	yes	no	2;3	4.5567e-36	192.3	1	1	2	2	2	3	10043000	8064200	27133000	47942000	45059000	42015000
AIFGSGSPFDPVVYDGK	17	0	1754.85	AT5G11670.1	AT5G11670.1	464	480	yes	yes	2	0.0006592	117.07	1	1	1	1	1	1	35495000	41931000	55152000	63791000	70319000	68964000
AIFQPPTPIR	10	0	1138.65	AT4G25900.1	AT4G25900.1	80	89	yes	yes	2	8.2742e-08	160.63	1	1	1	1	1	1	2144800000	2204800000	1946900000	1982700000	2061900000	2087400000
AIGSGSEGADSSLQEQFNK	19	0	1923.88	AT3G14290.1;AT1G53850.2;AT1G53850.1	AT3G14290.1	167	185	yes	no	2	9.1354e-147	358.67	1	1	1	1	1	1	52364000	0	70206000	55042000	46175000	59486000
AIGVDLLNNPDLVANDAVIAFK	22	0	2281.23	AT3G12500.1	AT3G12500.1	215	236	yes	yes	2	2.0927e-55	216.54	1	1	1	1	1	1	32899000	13990000	28011000	56577000	41772000	45928000
AIHLAPNATISGVASR	16	0	1576.87	AT4G09670.1	AT4G09670.1	24	39	yes	yes	2;3	0.0014371	82.171		1	2	2	1	2	0	16286000	25361000	47321000	16361000	43399000
AIIGTIGDVDSYQLPDAK	18	0	1874.96	AT3G19170.1;AT3G19170.2;AT1G49630.5;AT1G49630.3;AT1G49630.2;AT1G49630.1;AT1G49630.4	AT3G19170.1	989	1006	yes	no	2	6.0051e-14	169.62	1	1	1	1	1	1	51668000	36580000	51757000	56294000	41818000	58775000
AIIISVIDNLVK	12	0	1296.8	AT2G19940.3;AT2G19940.1	AT2G19940.3	349	360	yes	no	2	5.0102e-06	143.03	1	1	1	1	1	1	18208000	9246300	26082000	28497000	28496000	16969000
AIISDFITSLTHTSPTSK	18	0	1918	AT4G08950.1	AT4G08950.1	63	80	yes	yes	3	0.00013802	106.94	1	1	1				7710500	7000500	5795900	0	0	0
AIKEEIKK	8	2	957.586	AT3G03780.3;AT3G03780.2;AT3G03780.1;AT5G17920.2;AT5G17920.1	AT5G17920.2	466	473	no	no	2	0.019555	138.78	1	1	1	1	1	1	35914000	44531000	39242000	46773000	42866000	39070000
AIKEESEGK	9	1	989.503	AT1G13440.1;AT1G13440.2;AT3G04120.1	AT3G04120.1	265	273	no	no	2	0.021057	137.13	1		1	1		1	12128000	0	8027000	6961000	0	8905300
AILDGVDVLSLSLGGGSAPYYR	22	0	2222.16	AT2G05920.1	AT2G05920.1	266	287	yes	yes	2;3	1.7495e-23	163.8	1				1	1	11856000	0	0	0	0	0
AILLWTLEPGER	12	0	1396.77	AT1G35720.1	AT1G35720.1	76	87	yes	yes	2	5.5711e-21	195.7	1	1	1	1	1	1	54163000	47621000	55883000	51258000	42185000	48002000
AILNESSEFVGDK	13	0	1407.69	AT3G55440.1	AT3G55440.1	101	113	yes	yes	2	2.3389e-13	169.65		1	1	1	1	1	0	457850000	385910000	319430000	288520000	304990000
AILPENGPLTTESVTIQR	18	0	1938.04	AT1G21680.1	AT1G21680.1	290	307	yes	yes	2	5.0972e-05	148.68	1			1	1	1	19156000	0	0	24106000	20418000	22271000
AILQTILDAEAK	12	0	1284.73	AT1G06290.1	AT1G06290.1	577	588	yes	yes	2	0.00097102	107.79	1	1	1	1	1	1	7173500	7325000	5439400	13098000	10046000	9376500
AINGALECDGANTATVQAR	19	0	1930.92	AT3G54420.1	AT3G54420.1	234	252	yes	yes	2	1.2024e-129	286.74	1	1	1	1		1	124470000	84640000	71736000	76346000	0	85525000
AIPDPFYGLENEAITDIADSGR	22	0	2363.13	AT1G09010.1	AT1G09010.1	60	81	yes	yes	2;3	4.4985e-07	132.81	2	2	1	2	2		36105000	19212000	9306000	25835000	36646000	0
AIPSWELSGFVEYIK	15	0	1737.9	AT5G11420.1	AT5G11420.1	52	66	yes	yes	2	4.3388e-13	171.92	1	1	1	1	1	1	255290000	125170000	230120000	235260000	204950000	171640000
AIQDVFPNESELVVK	15	0	1686.88	AT2G20420.1	AT2G20420.1	60	74	yes	yes	2	2.3325e-12	161.99	1	1	1	1	1	1	49998000	53785000	56538000	61962000	44841000	53280000
AIQLVLDQSTGCGFASK	17	0	1793.9	AT5G65730.1	AT5G65730.1	56	72	yes	yes	2;3	4.7496e-118	291.13	2	2	2	2	2	2	1654600000	1504300000	2139500000	1565700000	1795800000	1822600000
AISLVSLLMLPEK	13	0	1412.83	AT5G10560.1	AT5G10560.1	53	65	yes	yes	2	7.2801e-14	172.1	2	2	2	2	2	2	81791000	74326000	100750000	144020000	148040000	122900000
AISNNFLTLMR	11	0	1278.68	AT5G64570.1;AT5G64570.3;AT5G64570.2	AT5G64570.1	366	376	yes	no	2	0.00097771	150.27	2	2	2	1	1	1	211450000	187650000	226760000	104230000	107920000	179760000
AISSAIVDLIDLGGK	15	0	1470.83	AT1G28670.1;AT1G28650.1;AT1G28640.1	AT1G28670.1	205	219	yes	no	2	2.3325e-12	161.99	1	1	1	1	1	1	32647000	24742000	20607000	32773000	30602000	26225000
AITVFSPDGHLFQVEYALEAVR	22	0	2461.26	AT3G51260.1;AT3G51260.2;AT5G66140.1	AT3G51260.1	7	28	yes	no	3	0.0045705	45.395			1		1		0	0	8487800	0	7432900	0
AIVFEDVADALEK	13	0	1418.73	AT5G53850.4;AT5G53850.6;AT5G53850.2;AT5G53850.5;AT5G53850.1;AT5G53850.3	AT5G53850.4	293	305	yes	no	2	3.3504e-06	138.25	1		1	1		1	0	0	23927000	27445000	0	26023000
AIVNIISNPVNSTVPIAAEVFK	22	0	2295.28	AT2G22780.1	AT2G22780.1	153	174	yes	yes	3	4.6407e-07	121.46	1	1	1	1	1	1	33526000	45613000	31963000	21870000	23859000	23754000
AIVNSDLGVTPNNDGDVIR	19	0	1967.99	AT3G63190.1	AT3G63190.1	171	189	yes	yes	2;3	5.5385e-130	345.38	2	1	1	2	2	1	234880000	272300000	235580000	415890000	304510000	327200000
AIVQSPTYIVR	11	0	1245.71	AT3G54400.1	AT3G54400.1	81	91	yes	yes	1;2	1.392e-45	242.39	1	2	2	2	2	2	5517300000	6832100000	6936600000	8443400000	6983100000	8167700000
AIYIDDLADWIK	12	0	1434.74	AT4G29700.1	AT4G29700.1	281	292	yes	yes	2	0.0076968	86.898	1	1	1	1	1	1	5484900	7512800	8067800	12546000	13677000	7312700
AKDELAGSIQK	11	1	1158.62	AT5G09660.2;AT5G09660.1;AT5G09660.5	AT5G09660.2	316	326	yes	no	2	1.2516e-70	236.95	1	1	1	1	1	1	87515000	0	69784000	31683000	35102000	36425000
AKHVLGWKPEFDLVEGLTDSYNLDFGR	27	2	3105.56	AT1G09340.1;AT1G09340.2	AT1G09340.1	329	355	yes	no	4	1.463e-10	99.135	1		1	1	1	1	19610000	0	15698000	17833000	12618000	11928000
AKHYLSLTSGGLGAYSDSR	19	1	1981.99	AT1G23310.1;AT1G23310.2;AT1G70580.4;AT1G70580.3;AT1G70580.2;AT1G70580.1	AT1G23310.1	89	107	yes	no	2;3;4	5.4075e-111	273.54	3	2	3	3	3	3	104450000	109280000	109650000	138660000	152430000	72087000
ALADIVINHR	10	0	1120.64	AT4G25000.1	AT4G25000.1	109	118	yes	yes	2;3	3.8493e-20	210.1	2	2	2	2	2	2	121050000	139860000	122960000	186220000	177540000	170090000
ALAENEGEGLAK	12	0	1200.6	AT4G16155.1	AT4G16155.1	478	489	yes	yes	2	9.7111e-06	164.97	1	2	2	2	1	2	73953000	84911000	81016000	74850000	68355000	86725000
ALAGQTNESFFTANADALSSR	21	0	2170.03	AT3G03780.3;AT3G03780.2;AT3G03780.1	AT3G03780.3	367	387	yes	no	2;3	9.8038e-159	303.47	1	1	2	2	2	2	74140000	66793000	106230000	124150000	111720000	135490000
ALAHQPISVAIEAGGR	16	0	1588.87	AT5G43060.1	AT5G43060.1	263	278	yes	yes	2;3	3.3421e-09	160.22	1	2	2	2	1	2	270230000	348750000	461820000	429570000	282170000	401680000
ALAHQPLSVAIDASGR	16	0	1604.86	AT1G20850.1	AT1G20850.1	263	278	yes	yes	2;3	1.0822e-06	141.38	1	2	2	2	2	2	57061000	137800000	190890000	119120000	127070000	118250000
ALAHQPVSVAIEASGR	16	0	1604.86	AT4G35350.1;AT4G35350.2	AT4G35350.1	262	277	yes	no	2;3	2.0176e-11	128.54		2	1	2	2	2	0	96501000	51420000	56389000	84722000	112050000
ALALGASGIFIGR	13	0	1244.72	AT3G14415.1;AT3G14415.3;AT3G14415.2;AT3G14420.3;AT3G14420.2;AT3G14420.1;AT3G14420.4;AT3G14420.5;AT3G14420.6	AT3G14420.3	297	309	no	no	2	0.0038364	84.054	1	1	1	1	1	1	8680800	10790000	8699200	8560300	9474000	11626000
ALAVINPGNPTGQVLSEENQR	21	0	2206.13	AT1G17290.1	AT1G17290.1	283	303	yes	yes	2;3	2.1742e-42	244.46	2		2	2	1	2	31474000	0	56725000	41156000	19945000	60611000
ALCTGEK	7	0	777.369	AT3G62030.3;AT3G62030.1;AT3G62030.2;AT4G34960.2;AT2G29960.2;AT2G29960.3;AT2G29960.1;AT5G58710.1;AT4G34960.1;AT4G32420.4;AT4G32420.6;AT4G32420.5;AT4G32420.3;AT4G32420.1;AT4G34870.1;AT4G38740.1;AT2G21130.1;AT5G13120.2;AT5G13120.1	AT3G62030.3	128	134	no	no	2	0.0064768	143.37	1	1	1	1	1	1	665570000	631260000	519040000	294720000	323670000	334360000
ALDECSR	7	0	849.365	AT1G47960.2;AT1G47960.1	AT1G47960.2	89	95	yes	no	2	0.006652	154.09	1	1	1	1	2	2	424530000	432920000	501600000	493040000	546560000	539230000
ALDENLLASPEK	12	0	1298.67	AT2G43570.1	AT2G43570.1	193	204	yes	yes	2	7.0657e-95	279.77	1	1	1	1	1	1	1110000000	1109300000	1034200000	1120200000	1280000000	1084800000
ALDGDGDVYECSFVESTLTDLPFFASR	27	0	3010.35	AT3G47520.1	AT3G47520.1	323	349	yes	yes	3	0.0036847	45.042				1			0	0	0	8978000	0	0
ALDLASKPEGTGTPTK	16	1	1584.84	AT2G37660.1	AT2G37660.1	297	312	yes	yes	2;3	0.011663	128.68	1	2	1	1	2	1	19592000	35227000	12716000	8199300	9939900	7247100
ALDLVPEK	8	0	883.501	AT1G43670.1	AT1G43670.1	305	312	yes	yes	2	0.040383	94.114	1	1	1	1	1	1	20932000	31187000	23148000	23401000	30801000	24066000
ALDMNTAEDAIVR	13	0	1417.69	AT5G54770.1	AT5G54770.1	259	271	yes	yes	2	1.3076e-21	192.1	1	1	2	1	1	2	39247000	31300000	53595000	46484000	0	35789000
ALDSALDQNLK	11	0	1186.62	AT4G12060.1	AT4G12060.1	178	188	yes	yes	2	1.0775e-07	158.87	1	1		1		1	28310000	153540000	0	18175000	0	14921000
ALDTLDLSK	9	0	974.528	AT1G33590.1;AT1G33590.3;AT1G33590.2	AT1G33590.1	272	280	yes	no	1;2	2.1103e-06	180.44	3	2	2	3	3	3	8830900000	9645500000	8797200000	9898800000	10455000000	10973000000
ALDYDTLNENVK	12	0	1393.67	AT1G23310.1;AT1G23310.2	AT1G23310.1	5	16	yes	no	2	2.2304e-53	239.6	1	1	1	1	1	1	151560000	171140000	143620000	151020000	149970000	167180000
ALEAVSLGGK	10	0	943.534	AT4G34480.1;AT4G34480.2;AT4G34480.3;AT2G16230.1	AT4G34480.1	142	151	yes	no	2	0.0040187	120.87	1	1	1	1	1	1	97093000	103290000	81022000	115850000	113680000	95298000
ALEGADLVIIPAGVPR	16	0	1589.91	AT1G53240.1;AT3G15020.1;AT3G15020.2	AT1G53240.1	94	109	yes	no	2;3	4.3154e-37	205.56	2	2	2	2	2	2	289350000	223310000	299710000	320840000	308300000	333650000
ALEIAEK	7	0	772.433	AT3G08590.2;AT3G08590.1	AT3G08590.2	404	410	yes	no	2	0.033465	107.43		1	1				0	28886000	25231000	0	0	0
ALEICVK	7	0	831.452	AT1G19570.1	AT1G19570.1	2	8	yes	yes	1;2	0.0094729	139.27	2	2	2	2	2	2	291790000	194180000	252430000	329080000	408860000	278270000
ALEKPDGGEFGNYYSLPALNDPR	23	1	2522.21	AT4G35830.1	AT4G35830.1	13	35	yes	yes	3	3.3001e-08	75.868	1		1	1	1	1	39239000	0	43420000	39147000	54198000	55287000
ALELASISDPLK	12	0	1255.7	AT1G09390.1	AT1G09390.1	142	153	yes	yes	2	7.8164e-06	140.17	1		1				106990000	0	54702000	0	0	0
ALESANLGGDK	11	0	1073.54	AT5G46290.2;AT5G46290.1;AT5G46290.3	AT5G46290.2	142	152	yes	no	2	0.0045576	104.22	1			1	1	1	21803000	0	0	0	0	31895000
ALESLNIPTVK	11	0	1183.68	AT4G18760.1	AT4G18760.1	55	65	yes	yes	2	0.0024238	112.71	1	1	1	1	1	1	27644000	23764000	26306000	30466000	28719000	35649000
ALFEESIPAFDVLGK	15	0	1634.86	AT3G25530.1;AT3G25530.2;AT3G25530.3	AT3G25530.1	141	155	yes	no	2	2.3916e-08	157.68	1	1	1	1	1	1	37272000	34854000	31420000	58865000	49532000	40376000
ALFGSDGTSTLYR	13	0	1386.68	AT4G25720.4;AT4G25720.2;AT4G25720.3;AT4G25720.1;AT4G25720.5	AT4G25720.4	186	198	yes	no	2	5.961e-06	164.97	1	1	1	1	1	1	124660000	134680000	100440000	131670000	112760000	133310000
ALFTTFSGTK	10	0	1071.56	AT5G34940.2;AT5G34940.1;AT5G34940.4	AT5G34940.2	394	403	yes	no	2	9.7664e-07	139.74	1	1	1	1	1	1	79657000	80655000	0	74322000	84388000	133800000
ALGFDGLR	8	0	847.455	AT1G02360.1;AT1G02360.2;AT1G02360.3	AT1G02360.1	160	167	yes	no	2	0.00015224	173.85	2	2	2	2	2	2	595640000	434120000	399230000	760960000	547990000	483010000
ALGIPETADEAEALGIIR	18	0	1837.98	AT1G06130.2;AT1G06130.1	AT1G06130.2	305	322	yes	no	2	4.6231e-09	156.69	1	1	1	1	1	1	23342000	24679000	19440000	25572000	33119000	22668000
ALGLPVSK	8	0	783.485	AT1G68010.1;AT1G68010.2	AT1G68010.1	378	385	yes	no	2	0.044458	92.47		1	1	1		1	0	150220000	116490000	117770000	0	126890000
ALGNPPLLSSWNPR	14	0	1520.81	AT3G12145.1	AT3G12145.1	38	51	yes	yes	2	1.0547e-13	173.28	1	1	1	1	1	1	226820000	176960000	216840000	188940000	169100000	172890000
ALGQISER	8	0	872.472	AT1G04410.1	AT1G04410.1	164	171	yes	yes	2	5.235e-08	196.98	1	1	1	1	1	1	189030000	281300000	197090000	198020000	268870000	195890000
ALGSGLNAGR	10	0	914.493	AT2G38540.1	AT2G38540.1	83	92	yes	yes	2	1.9935e-14	189.53	4	5	5	4	3	2	19832000000	33429000000	23799000000	11387000000	10311000000	10526000000
ALHASDGVNLK	11	0	1123.6	AT4G15100.1	AT4G15100.1	353	363	yes	yes	2	2.6738e-05	132.39				1	1	1	0	0	0	0	23979000	21456000
ALHLFSSFVSGR	12	0	1319.7	AT5G42240.1	AT5G42240.1	450	461	yes	yes	2;3	4.4444e-08	180.74	2	2	2	2	2	2	58342000	64195000	59017000	88583000	86409000	72253000
ALIDATSSGSDLEDESGIR	19	0	1934.91	AT5G60160.1	AT5G60160.1	275	293	yes	yes	2	0.0005942	89.992		1					0	42200000	0	0	0	0
ALIDHSVVESFGGK	14	0	1457.75	AT3G13790.2;AT3G13790.1;AT3G13790.5;AT3G13790.4;AT3G13790.3	AT3G13790.2	521	534	yes	no	2;3	4.6624e-27	194.17	2	2	2	2	2	2	535580000	453220000	441050000	284370000	212450000	216520000
ALIEAPR	7	0	768.449	AT3G16530.1	AT3G16530.1	231	237	yes	yes	2	0.0069333	137.83	1	1	1	1	1	1	6592800000	10431000000	7979700000	7752600000	8340400000	7487100000
ALIPDLYR	8	0	959.544	AT2G32520.3;AT2G32520.1;AT2G32520.4;AT2G32520.2	AT2G32520.3	46	53	yes	no	2	0.017528	111.04	1	1	1	1	1	1	15282000	16814000	13781000	15634000	7162100	13406000
ALLAVSGR	8	0	785.476	AT4G16155.1;AT3G16950.1;AT3G16950.2	AT4G16155.1	132	139	yes	no	2	0.0016121	160.03	1	1	1	1	1	1	22616000	32784000	19026000	41491000	33041000	32316000
ALLDDPVFRPLVEK	14	1	1610.9	AT1G07890.6;AT1G07890.8;AT1G07890.7;AT1G07890.5;AT1G07890.4;AT1G07890.3;AT1G07890.2;AT1G07890.1	AT1G07890.6	210	223	yes	no	2;3	0.00016577	122.64	1	2	1	1	1	1	33380000	48566000	37551000	26363000	23646000	20407000
ALLDLLLEDMR	11	0	1300.71	AT5G57850.2;AT5G57850.1	AT5G57850.2	274	284	yes	no	2	0.0013025	140.75	1	2	2	2	1	1	9927900	3999300	7868500	12287000	0	3872500
ALLEVVESGGK	11	0	1100.61	AT3G51260.1;AT3G51260.2;AT5G66140.1	AT3G51260.1	193	203	yes	no	2	0.011339	90.696	1	1	1	1	1	1	46183000	48387000	63218000	70116000	61726000	62327000
ALLHSSHMYHEAK	13	0	1522.74	AT1G48030.5;AT1G48030.4;AT1G48030.3;AT1G48030.2;AT1G48030.1;AT3G17240.3;AT3G17240.1	AT1G48030.5	92	104	no	no	3	0.0028603	78.529					1	1	0	0	0	0	7914700	22676000
ALLHSVPFGK	10	0	1067.61	AT5G13690.1;AT5G13690.2	AT5G13690.1	398	407	yes	no	2;3	2.4943e-05	147.29	2	2	2	2	2	2	54400000	81542000	61018000	88479000	105880000	101470000
ALLINGQR	8	0	883.524	AT4G36360.2;AT4G36360.1	AT4G36360.2	39	46	yes	no	2	0.007361	129.96	1	1	1	1	1	1	0	43059000	38658000	53218000	53346000	63400000
ALLLPVTK	8	0	853.564	AT1G03220.1;AT1G03230.1	AT1G03220.1	30	37	no	no	1;2	0.025108	150.17	2	2	2	2	2	2	2741100000	2598800000	2176900000	2273600000	2325800000	2517600000
ALLNLFAVQLR	11	0	1256.76	AT5G10560.1	AT5G10560.1	367	377	yes	yes	2	8.7666e-10	166.68	1	1	1	1	1	1	11234000	7149500	12170000	18191000	17054000	12160000
ALLNLFSVR	9	0	1031.61	AT1G78060.1	AT1G78060.1	350	358	yes	yes	2	1.8291e-15	209.37	1	1	1	1	1	1	88664000	95460000	93943000	174900000	190560000	165850000
ALLNSGR	7	0	729.413	AT5G08370.2;AT5G08370.1	AT5G08370.2	154	160	yes	no	2	2.6276e-09	178.02	1	1	1	1	1	1	0	362090000	357220000	429430000	446290000	381740000
ALLQHLEAELEELEK	15	0	1763.93	AT5G65620.2;AT5G65620.1	AT5G65620.2	137	151	yes	no	2;3	4.6925e-43	244.58	2	1	2	2	2	2	23967000	4751900	19138000	21389000	22420000	15988000
ALLSHLTK	8	0	881.533	AT3G14930.3;AT3G14930.2;AT3G14930.1	AT3G14930.3	155	162	yes	no	2	0.028456	101.6	1	1	1	1	1	1	17519000	14353000	19605000	26662000	0	21367000
ALLSPAALIAQNAGVEGEVVVEK	23	0	2277.26	AT2G28000.1	AT2G28000.1	492	514	yes	yes	3	4.969e-09	105.92	1		1	1		1	16513000	0	12525000	13485000	0	11663000
ALLTELTK	8	0	887.533	AT3G22060.1	AT3G22060.1	166	173	yes	yes	1;2	3.9772e-05	189.53	2	2	2	2	2	2	4641500000	4136300000	3464500000	4731700000	5607200000	4006700000
ALLTLEEK	8	0	915.528	AT1G19570.1	AT1G19570.1	26	33	yes	yes	1;2	6.4977e-09	202.17	2	2	2	2	2	2	779350000	645350000	535190000	890040000	1034500000	727020000
ALNPGLVYDIEVK	13	0	1429.78	AT3G14067.1	AT3G14067.1	613	625	yes	yes	2	8.0362e-05	117.52	1	1	1	1	1	1	41525000	28175000	0	40043000	46589000	42640000
ALPAIEK	7	0	740.443	AT3G62110.2;AT3G62110.1	AT3G62110.2	363	369	yes	no	2	0.049439	97.068	1	1	1	1	1	1	38876000	46995000	37137000	43689000	34107000	41638000
ALPNQQTVDYPSFK	14	0	1606.8	AT5G20010.1;AT5G55190.1;AT5G20020.1	AT5G20010.1	2	15	yes	no	2	8.917e-09	183	1	1	1	1	1	1	88483000	104270000	84832000	93255000	89018000	68449000
ALPPLADLARPEEK	14	1	1518.84	AT2G47390.1	AT2G47390.1	145	158	yes	yes	3	0.00019857	119.62	1	1	1	1	1	1	33561000	41254000	41192000	32447000	49927000	58223000
ALPTYTPESPGDATR	15	0	1574.76	AT3G60750.2;AT3G60750.1	AT3G60750.2	419	433	yes	no	2	1.3368e-12	167.2		1	1		1	1	0	69417000	49189000	0	29019000	44361000
ALQGLPPPVDGVLALSPGSSSFTK	24	0	2337.26	AT5G19110.1;AT5G19110.2	AT5G19110.1	151	174	yes	no	3	0.00020996	65.278	1	1		1	1		6522500	5263000	0	7095400	5157900	0
ALQNSVLR	8	0	899.519	AT2G01140.1	AT2G01140.1	333	340	yes	yes	2	0.02637	104.75	1	1	1		1	1	16174000	27926000	21822000	0	13855000	0
ALQNTCLK	8	0	946.491	AT4G38970.1;AT2G21330.1	AT4G38970.1	340	347	no	no	1;2	0.0070405	151.5	2	2	2	2	2	2	1233200000	1350800000	1227600000	1100200000	859120000	830730000
ALQQSTLK	8	0	887.508	AT2G36460.1;AT2G36460.3;AT2G36460.2;AT5G03690.2;AT5G03690.1;AT5G03690.4;AT5G03690.3;AT3G52930.1;AT4G26530.3;AT4G26530.2;AT4G26530.1	AT3G52930.1	299	306	no	no	1;2	0.025063	113.26	2	2	2	2	2	2	66370000	81588000	58289000	44749000	49011000	36761000
ALSDYVHSK	9	0	1018.51	AT5G08370.2;AT5G08370.1	AT5G08370.2	83	91	yes	no	2	2.2532e-07	181.69	1	1	1	1	1	1	311400000	350390000	296500000	363760000	362670000	395400000
ALSLPTGLGIVCASPK	16	0	1582.88	AT2G13360.3;AT2G13360.2;AT2G13360.1	AT2G13360.3	202	217	yes	no	2;3	1.0409e-12	165.7	2	2	2	2	2	2	161110000	143260000	161650000	186000000	210410000	228360000
ALSLVDTHGK	10	0	1039.57	AT3G19620.1	AT3G19620.1	736	745	yes	yes	2	0.014997	95.502	1	1	1	1	1	1	49361000	63585000	50638000	38521000	43290000	56735000
ALSPGLVYDISTEEYIR	17	0	1924.98	AT2G05920.1	AT2G05920.1	603	619	yes	yes	2	3.157e-62	227.93	1	1	1	1	1	1	169630000	125510000	174420000	124000000	121440000	132390000
ALSPVHSTPSR	11	0	1150.61	AT4G19410.1;AT4G19410.2	AT4G19410.1	314	324	yes	no	2;3	6.2748e-59	260.19	2	2	2	2	2	2	5019400000	6222300000	6812400000	2586000000	2645600000	2471800000
ALSSQHQVR	9	0	1024.54	AT5G28540.1;AT5G42020.3;AT5G42020.1;AT5G42020.2	AT5G42020.3	309	317	no	no	2	3.3614e-10	189.82	1	1	1	1	1	1	27975000	51355000	35392000	26061000	30528000	29040000
ALTAIPSLK	9	0	912.564	AT5G21090.1	AT5G21090.1	161	169	yes	yes	2	2.5173e-05	160.11	1	1	1	1	1	1	17785000	30741000	21734000	15053000	15187000	15104000
ALTSLALK	8	0	815.512	AT3G27850.1;AT3G27830.2;AT3G27830.1	AT3G27850.1	141	148	yes	no	2	0.017138	111.65			1		1		0	0	7489700	0	8205700	0
ALTTEEIEEHLTAISER	17	0	1940.97	AT5G35590.1	AT5G35590.1	229	245	yes	yes	3	0.00017657	101.96	1	1		1	1	1	11677000	9350000	0	9082600	11337000	13745000
ALTTEEIEEHLTAISERD	18	1	2056	AT5G35590.1	AT5G35590.1	229	246	yes	yes	3	2.6541e-22	137.44	1	1	1	1	1	1	21852000	16128000	19008000	27224000	22621000	0
ALVASNLNFK	10	0	1075.6	AT3G13560.5;AT3G13560.4;AT3G13560.3;AT3G13560.2;AT3G13560.1	AT3G13560.5	141	150	yes	no	2	0.011281	101.6			1	1	1	1	0	0	13149000	27636000	24152000	28566000
ALVDELEALENHLK	14	0	1592.84	AT1G75270.1	AT1G75270.1	122	135	yes	yes	3	6.9038e-05	97.551	1		1		1		6877300	0	8157200	0	0	0
ALVIDGK	7	0	714.428	AT2G28470.4;AT2G28470.2;AT2G28470.3;AT2G28470.1;AT2G28470.5	AT2G28470.4	32	38	yes	no	2	0.065102	90.986		1				1	0	635790000	0	0	0	582090000
ALVTLIEK	8	0	885.554	AT2G30860.2;AT2G30860.1	AT2G30860.2	16	23	yes	no	2	0.058526	86.794	1	1	1	1	1	1	11151000	16185000	13704000	16353000	17357000	17962000
ALYPPRPTNK	10	1	1155.64	AT5G11420.1	AT5G11420.1	183	192	yes	yes	2;3	0.0025947	108.57	2	2	2	1	1	1	642100000	630120000	573480000	215350000	226620000	157330000
ALYYLCEAADDAVR	14	0	1628.75	AT5G04140.1;AT5G04140.2	AT5G04140.1	691	704	yes	no	2	6.0392e-19	178.08	2	2	2	2	2	3	114810000	102310000	122570000	159790000	174560000	136100000
AMAADVFIK	9	0	964.505	AT1G68560.1	AT1G68560.1	384	392	yes	yes	2	0.021931	95.531	2	2	2	2	2	2	312010000	255390000	308580000	120310000	140320000	160070000
AMAKPIVGADK	11	1	1099.61	AT3G45970.2;AT3G45970.1	AT3G45970.2	88	98	yes	no	2	9.8324e-12	161.51	2	2	2	2	2	2	62590000	30807000	58629000	69952000	37887000	95164000
AMAKPIVGADKDLLK	15	2	1568.9	AT3G45970.2;AT3G45970.1	AT3G45970.2	88	102	yes	no	3	7.9529e-13	168.41	2	2	2	2	2	2	311810000	234370000	308360000	216150000	223920000	280000000
AMGSNIDVTFDCAGFNK	17	0	1845.8	AT5G51970.2;AT5G51970.1	AT5G51970.2	250	266	yes	no	2	0.022233	57.802	1						19600000	0	0	0	0	0
AMHAVIDR	8	0	911.465	ATCG00490.1	ATCG00490.1	296	303	yes	yes	1;2	2.1892e-12	209.44	4	4	3	4	4	4	6437500000	6761200000	7104000000	4992100000	6530700000	6384000000
AMVGVPPLVWSQTLEAAASR	20	0	2082.09	AT5G66590.1	AT5G66590.1	58	77	yes	yes	2;3	2.3568e-16	163.27	1	3	2	2	1	2	11993000	26140000	16635000	15735000	10645000	20741000
AMVIINPGNPTGQCLSEANIR	21	0	2254.12	AT1G23310.1;AT1G23310.2;AT1G70580.4;AT1G70580.3;AT1G70580.2;AT1G70580.1	AT1G23310.1	213	233	yes	no	2;3	5.048e-69	228.25	4	4	4	4	3	4	246870000	207870000	257600000	220730000	217310000	269510000
ANAASGMAVHDDCK	14	0	1445.6	AT5G59880.2;AT5G59880.1;AT3G46000.1;AT5G59890.1;AT3G46010.1	AT5G59880.2	2	15	yes	no	2	3.4286e-103	238.2	2	2	1	2	2	2	35694000	59848000	54167000	29703000	31475000	37171000
ANDFDLMYEQVK	12	0	1471.67	AT1G32060.1	AT1G32060.1	124	135	yes	yes	2	5.1015e-06	142.94	1	1	1	1	1	1	48045000	36715000	44765000	11882000	17178000	23364000
ANETYGSSPK	10	0	1052.48	AT2G43910.2;AT2G43910.1;AT2G43910.3;AT2G43920.6;AT2G43920.5;AT2G43920.4;AT2G43920.3;AT2G43920.2;AT2G43920.1	AT2G43910.2	104	113	yes	no	2	0.0023455	127.4	1	1	1	1	1	1	12380000	19721000	14367000	9880600	0	10366000
ANIGTPAQPMLVALDTSNDAAWIPCSGCVGCSSSVLFDPSK	41	0	4292.98	AT3G54400.1	AT3G54400.1	92	132	yes	yes	3;4	3.6725e-26	95.817	1	1	2		2	2	41972000	6653800	27531000	0	50832000	48634000
ANLPTVLVTGASGR	14	0	1354.76	AT5G02240.1	AT5G02240.1	2	15	yes	yes	2	0.0021768	78.692	1	1	1	1	1	1	43476000	50172000	45662000	38196000	43725000	46297000
ANNPSQLLPSELIDR	15	0	1665.87	AT5G48870.1	AT5G48870.1	2	16	yes	yes	2	2.8286e-07	168.98	1	1	1	1	1	1	6906600	9350400	0	0	6526600	6765500
ANPEADDATEIAGNIVYHAK	20	0	2098	AT3G46970.1	AT3G46970.1	20	39	yes	yes	3	4.9372e-05	89.107		1			1	1	0	18412000	0	0	28812000	28230000
ANPNADASAQQAFVTNVINR	20	0	2100.03	AT3G14210.2;AT3G14210.1	AT3G14210.1	170	189	no	no	2;3	0	400.55	2	2	2	2	2	2	637690000	654320000	653830000	916850000	898700000	927660000
ANSLAQLGK	9	0	900.503	AT4G38970.1;AT2G21330.1;AT2G21330.3;AT2G01140.1	AT4G38970.1	369	377	no	no	2	0.0042823	129.42	1	1	1				1437600000	1394400000	1324900000	0	0	0
ANTFVAEVLGLDPR	14	0	1500.79	AT5G09660.2;AT5G09660.1;AT5G09660.3;AT5G09660.4	AT5G09660.2	174	187	yes	no	2	2.559e-42	221.75	1	1	1	1	1	1	86909000	68034000	78427000	76804000	71870000	72592000
ANVDPALVQEVVFGNVLSANLGQAPAR	27	0	2748.46	AT5G48230.2;AT5G48230.1	AT5G48230.2	50	76	yes	no	3	4.5827e-22	155.87		1		1	1	1	0	3852600	0	6291300	5183900	9174400
ANVLDASILWR	11	0	1256.69	AT1G31180.1;AT1G31180.2;AT5G14200.1;AT5G14200.3;AT5G14200.2	AT5G14200.1	237	247	no	no	2	0.0025461	111.65		1		1		1	0	4009900	0	7833600	0	7414900
ANVPIHVR	8	0	904.524	AT5G49360.1	AT5G49360.1	52	59	yes	yes	1;2	6.2211e-05	180.15	2	2	2	2	2	2	3811100000	4902000000	3929800000	5018900000	5226000000	6060900000
ANVYLDSSGK	10	0	1052.51	AT1G16880.2;AT1G16880.1	AT1G16880.2	127	136	yes	no	2	0.033714	80.688	1	1	1				7127200	12885000	19414000	0	0	0
APAALGPYSQAIK	13	0	1285.7	AT3G20390.1;AT3G20390.2	AT3G20390.1	72	84	yes	no	2	3.9503e-06	136.48	1	1	1	1	1	1	74282000	0	84719000	106490000	86795000	81008000
APDFEAEAVFDQEFIK	16	0	1854.87	AT3G11630.1;AT5G06290.1;AT5G06290.2	AT3G11630.1	79	94	no	no	2;3	3.8922e-49	271.01	2	2	2	2	2	2	634940000	252440000	345090000	540430000	530430000	301970000
APDYSSTR	8	0	895.404	AT4G33220.1;AT4G33220.2	AT4G33220.1	233	240	yes	no	2	0.013627	117.16	1	1	1	1	1	1	21972000	29909000	15761000	22323000	25121000	19989000
APEALAEVR	9	0	954.513	AT4G34260.1	AT4G34260.1	107	115	yes	yes	2	1.6117e-15	209.84	1	1	1	1	1	1	485590000	361470000	306390000	374400000	296110000	271330000
APEALVGLFHGK	12	0	1237.68	AT5G16970.1	AT5G16970.1	322	333	no	no	2;3	0.00044033	116.3	2	1	1	2	2	1	41849000	17258000	17950000	48020000	38904000	24269000
APEHLGASR	9	0	936.478	AT3G59920.1	AT3G59920.1	61	69	yes	yes	2	0.034823	83.623		1	1		1	1	0	19936000	0	0	16695000	16771000
APEYLALTASVVELVK	16	0	1701.96	AT3G02720.1	AT3G02720.1	92	107	yes	yes	2	0.0018083	124.12	1		1	1	1	1	5472500	0	7130700	7711900	7445900	6763500
APFLVDIDAVQGK	13	0	1371.74	AT5G58600.2;AT5G58600.1	AT5G58600.2	189	201	yes	no	2	9.0473e-09	152.04	1	1	1	1	1	1	16105000	9030000	0	17777000	22426000	17758000
APFMASYR	8	0	941.443	AT4G30270.1	AT4G30270.1	206	213	yes	yes	2	1.5541e-07	190.49	1	1	1	1	1	1	95571000	86379000	104690000	121280000	129550000	164960000
APFTASYR	8	0	911.45	AT5G57560.1;AT5G57550.1;AT4G25810.1	AT5G57560.1	205	212	no	no	2	3.138e-17	179.97	1	1	1	1	1	1	0	172910000	0	0	0	0
APGGLIEGIADYVR	14	0	1429.76	AT2G15220.1;AT2G15130.1;AT2G15130.2	AT2G15220.1	134	147	yes	no	2	6.061e-09	196.11	1	1	1	1	1	1	69938000	56415000	68263000	110480000	93228000	83606000
APGVQTPVIVR	11	0	1135.67	AT1G20620.5;AT1G20620.1;AT1G20620.6;AT1G20620.2;AT4G35090.2;AT4G35090.3;AT4G35090.1	AT1G20620.5	92	102	no	no	2	1.4078e-58	253.64	1	1	1	1	1	1	709910000	791690000	732800000	962480000	927570000	941060000
APIAILGAEIDQMSPPALLK	20	0	2047.14	AT3G23600.2;AT3G23600.1	AT3G23600.2	160	179	yes	no	2;3	6.6739e-06	118.67	2	2	2	2	1	1	23798000	19966000	8889800	27148000	9237800	8891400
APIELLLK	8	0	895.574	AT2G34810.1	AT2G34810.1	360	367	yes	yes	2	0.0084939	127.12	1	1	1	1	1	1	74150000	95728000	86252000	68291000	69021000	66004000
APILPTENLPEDFDWR	16	0	1911.94	AT4G39090.1	AT4G39090.1	127	142	yes	yes	2	0.0017065	103.88	1			1	1		0	0	0	60812000	0	0
APIQAHFGELDNFVGFSDVTAAK	23	0	2433.2	AT2G32520.3;AT2G32520.1;AT2G32520.4;AT2G32520.2	AT2G32520.3	138	160	yes	no	3	1.0106e-05	84.327	1	1	1	1	1	1	32428000	28135000	26717000	41680000	39315000	41984000
APLIDTPTDTGEVK	14	0	1455.75	AT2G22970.2;AT2G22970.4;AT2G22970.1;AT2G22970.3	AT2G22970.2	136	149	yes	no	2	0.0016781	93.058		1	1	1	1		0	0	12304000	15634000	16782000	0
APLLIGCDVR	10	0	1112.6	AT3G56310.1;AT3G56310.2	AT3G56310.1	305	314	yes	no	2	0.005216	116.05	1	1	1	1	1	1	31028000	35249000	39796000	26018000	39403000	18287000
APLLLGCDIR	10	0	1126.62	AT5G08380.1;AT5G08380.2	AT5G08380.1	287	296	yes	no	2	4.9487e-11	193.29	2	1	1	1	1	1	1814800000	2676100000	1927400000	2695200000	2315100000	2486600000
APNFELPEPLTGNLWK	16	0	1824.94	AT1G21350.2;AT1G21350.3;AT1G21350.5	AT1G21350.2	74	89	yes	no	2	1.441e-08	181.44	1	1	1	1	1	1	17455000	13080000	19422000	29590000	0	25801000
APQLPEDIEWHFIGNLQSNK	20	0	2335.16	AT1G11930.2;AT1G11930.1	AT1G11930.2	85	104	yes	no	3	0.0010084	64.679				1	1		0	0	0	11303000	8025100	0
APSFIFVEDRPAPLDATSDPPSLFDGTTR	29	1	3118.52	AT5G02790.1	AT5G02790.1	2	30	yes	yes	3	1.8682e-28	135.02						1	0	0	0	0	0	53141000
APSGLPIDLR	10	0	1037.59	AT2G05990.2;AT2G05990.1	AT2G05990.2	84	93	yes	no	2	0.0060234	112.8	1	1	1	1	1	1	46050000	81433000	56598000	51286000	46050000	44723000
APTILMK	7	0	772.452	AT3G52840.1;AT3G52840.2	AT3G52840.1	419	425	yes	no	2	0.010207	130.05	1	1	1	1	1	1	151530000	114760000	99628000	143940000	142560000	170370000
APTNDRFDDLFFYGIDSA	18	1	2062.93	AT3G16400.2;AT3G16400.1	AT3G16400.2	453	470	no	no	2	1.1715e-18	176.32	1	1	1	1	1	1	14796000	12655000	9518000	16011000	23300000	15572000
APTPAMDSLK	10	0	1029.52	AT3G08590.2;AT3G08590.1	AT3G08590.2	45	54	yes	no	2	0.05703	73.233	1		1	1		1	16527000	0	21900000	13673000	0	18445000
APVSLDFETSVFK	13	0	1438.73	AT3G58610.3;AT3G58610.2;AT3G58610.1	AT3G58610.3	76	88	yes	no	2	2.8292e-34	213.34	1	1	1	1	1	1	38282000	38977000	46645000	51522000	47457000	39518000
APVVLSSGK	9	0	856.502	AT1G80600.1	AT1G80600.1	76	84	yes	yes	2	0.04924	82.279	1	1	1	1	1	1	22668000	25562000	18240000	31300000	36540000	24096000
APWYIQDKPR	10	1	1272.66	AT3G55260.1	AT3G55260.1	175	184	yes	yes	3	0.0061953	103.01	1	1	1	1	1	1	22057000	29584000	22943000	18849000	9990300	20913000
AQADDLPLVGNK	12	0	1239.65	AT3G11630.1;AT5G06290.1;AT5G06290.2	AT3G11630.1	67	78	no	no	2	0.0072053	87.913	2	1	1	1	1	1	107030000	142050000	110700000	75064000	71510000	74681000
AQEEVQK	7	0	830.413	AT1G72150.1	AT1G72150.1	2	8	yes	yes	2	0.027615	101.21	1	2	1				8217600	26644000	0	0	0	0
AQEISVALVK	10	0	1056.62	AT1G15000.1	AT1G15000.1	234	243	yes	yes	2	0.02109	88.948	1	1	1	1		1	38800000	25983000	26745000	47112000	0	53147000
AQENPDFFNWNR	12	0	1536.67	AT3G05910.1;AT3G05910.2;AT5G26670.1;AT5G26670.4;AT5G26670.3;AT5G26670.2	AT3G05910.1	132	143	yes	no	2	4.5435e-43	270.06	1	1	1	1	1	1	981270000	1142400000	968950000	791280000	804290000	831070000
AQGLEEDPR	9	0	1013.48	AT3G15730.1	AT3G15730.1	608	616	yes	yes	2	0.0037683	130.75	1	1	1	1	1	1	33804000	40761000	45679000	36035000	40733000	32230000
AQGLSVGSSLVEEDKLDLAK	20	1	2058.08	AT1G79550.2;AT1G79550.1	AT1G79550.2	233	252	yes	no	2;3	1.6092e-41	210.37	1	1	2	2	1	2	44187000	55947000	97457000	106540000	66665000	122420000
AQGLSVGSSLVEEDKLELATELLAK	25	1	2599.4	AT3G12780.1	AT3G12780.1	308	332	yes	yes	2;3	1.0174e-28	179.47	1	1	1	1	2	1	80500000	52802000	79176000	79580000	69356000	63892000
AQGQGTPLMPNR	12	0	1268.63	AT3G55430.1	AT3G55430.1	293	304	yes	yes	2	0.0033993	95.775	1	1	1	1	1	1	21049000	29019000	25810000	9139600	17469000	16051000
AQINATFNR	9	0	1033.53	AT1G35720.1	AT1G35720.1	199	207	yes	yes	2	4.2983e-10	172.15	1	1	1	1	1	1	61384000	70872000	62701000	50320000	0	67799000
AQKPNIPGHELAITSDEALSLEEFPK	26	1	2833.45	AT3G24170.3;AT3G24170.2;AT3G24170.1	AT3G24170.3	179	204	yes	no	3	0.047326	30.337				1			0	0	0	22330000	0	0
AQPSVESLEVLSK	13	0	1385.74	AT5G03630.1	AT5G03630.1	414	426	yes	yes	2	0.0033674	100.72		1	1	1	1	1	0	14358000	20400000	20993000	25266000	0
AQQIAISK	8	0	857.497	AT3G55260.1	AT3G55260.1	366	373	yes	yes	2	0.015103	116.73	1	1	1	1	1	1	177570000	115230000	144010000	115720000	66694000	0
AQQSLIYSFVAR	12	0	1381.74	AT1G04750.1;AT2G33120.1;AT2G33120.2	AT1G04750.1	2	13	yes	no	2	2.2668e-05	131.82	1		1	1	1	1	0	0	0	8268800	6636300	7436000
AQSELSSHQR	10	0	1141.55	AT5G42790.1;AT1G47250.1	AT5G42790.1	52	61	yes	no	2	2.2808e-73	278.02	1	1	1	1	1	1	33972000	44662000	46412000	24734000	25270000	28958000
AQTNSDSVR	9	0	976.457	AT1G78060.1	AT1G78060.1	647	655	yes	yes	2	0.020827	96.253				1			0	0	0	2985300	0	0
AQVDYILGSNPK	12	0	1303.68	AT2G44570.1	AT2G44570.1	386	397	yes	yes	2	0.035573	69.979				1			0	0	0	15643000	0	0
ARPSAESLDELVK	13	1	1413.75	AT3G52880.1;AT3G52880.2	AT3G52880.1	413	425	yes	no	2;3	1.832e-11	169.89	2	2	1	2	2	1	107530000	113810000	72958000	126140000	137680000	55938000
ASCETTSYPDR	11	0	1285.52	AT4G25260.1	AT4G25260.1	40	50	yes	yes	2	4.445e-10	170.47	1	1	1	1	1	1	28329000	43467000	33233000	25785000	34105000	23996000
ASCPQNIDPR	10	0	1156.53	AT4G37530.1;AT4G37530.2	AT4G37530.1	234	243	yes	no	2	0.013398	97.965	1		1			1	521910000	0	448490000	0	0	415530000
ASDFDSHGCVSPLNHLAQQFNHALK	25	0	2792.31	AT1G67830.1	AT1G67830.1	236	260	yes	yes	3;4;5	0.0026755	29.198	1		1	1	2	1	29776000	0	27782000	15331000	60954000	27185000
ASDSHTPTVTTPEKPLENK	19	1	2051.02	AT3G05900.1	AT3G05900.1	2	20	yes	yes	3	2.2622e-40	149.86	1	1	1	1	1	1	152050000	197290000	106020000	117370000	106520000	84456000
ASENPFR	7	0	819.388	AT4G35830.1	AT4G35830.1	2	8	yes	yes	1	0.040508	54.525				1	1		0	0	0	29008000	21691000	0
ASETLTDNSDR	11	0	1207.53	AT1G61900.2;AT1G61900.1;AT1G61900.3	AT1G61900.2	215	225	yes	no	2	4.3715e-27	214.83		1	1	1	1	1	0	43173000	31709000	39236000	50242000	39944000
ASFDEAPPGNAK	12	0	1202.56	AT1G22840.1;AT1G22840.2	AT1G22840.1	2	13	yes	no	2	3.6122e-05	129.38	1	1	1	1	2	1	59254000	83173000	51590000	50734000	0	70197000
ASGADYSSVVK	11	0	1082.52	AT3G20390.1;AT3G20390.2	AT3G20390.1	126	136	yes	no	2	0.0042107	105.2	1	1	1	1	1	1	110940000	141460000	116750000	138470000	120120000	135110000
ASGCNLFQGR	10	0	1108.51	AT1G29050.1	AT1G29050.1	58	67	yes	yes	2	9.5606e-07	154.71	1	1	1	1	1	1	51832000	96538000	71315000	97870000	87646000	122960000
ASGGFGSFVVNPR	13	0	1293.65	AT4G12420.2;AT4G12420.1	AT4G12420.2	132	144	yes	no	2	2.7552e-22	239.93	1	1	1	1	1	1	117980000	128820000	107780000	159800000	167320000	279150000
ASGLSEIGSTK	11	0	1048.54	AT2G41530.1	AT2G41530.1	2	12	yes	yes	2	1.899e-08	147.95	1	1	1			1	0	0	0	0	0	61570000
ASGNYPGR	8	0	820.383	AT5G49360.1	AT5G49360.1	602	609	yes	yes	2	6.3511e-05	180	1	1	1	1	1	1	1083600000	2294000000	1279800000	1879300000	1740400000	1726900000
ASGSGDGNLAPLDVTTAASFDNNYFK	26	0	2631.21	AT5G05340.1	AT5G05340.1	232	257	yes	yes	2;3	4.802e-125	352.6	2	2	2	2	2	2	217400000	202760000	253480000	506890000	456420000	509120000
ASGSGFQSK	9	0	867.409	AT4G25810.1	AT4G25810.1	55	63	yes	yes	2	0.019845	97.431				1	1		0	0	0	5147300	4615200	0
ASGSGFQTK	9	0	881.424	AT5G57550.1	AT5G57550.1	59	67	yes	yes	1;2	0.0027675	133.33	2	1	2	2	2	2	18956000	37853000	20050000	37325000	29013000	40135000
ASGTSLPAQGLMGLGR	16	0	1514.79	AT3G54400.1	AT3G54400.1	198	213	yes	yes	2;3	9.5087e-49	217.14	4	3	3	2	2	2	3222500000	3322200000	3406200000	2313300000	2303000000	3587500000
ASGVDPEVALTIPK	14	0	1395.76	AT3G53980.2;AT3G53980.1	AT3G53980.2	82	95	yes	no	2	0.00023974	163.59	1	1	1	1	1	1	38535000	36547000	25250000	88238000	75249000	72399000
ASGYPGR	7	0	706.34	AT5G64570.1;AT5G64570.2	AT5G64570.1	617	623	yes	no	2	0.014986	122.15	1	1	1	2	2	1	118280000	156670000	138260000	229460000	208010000	190920000
ASHIVGYPR	9	0	998.53	AT3G03780.3;AT3G03780.2;AT3G03780.1;AT5G17920.2;AT5G17920.1	AT5G17920.2	2	10	no	no	2	5.4624e-22	215.1	1	1	1	1	1	1	409000000	364150000	335100000	355000000	312110000	309160000
ASIVIQGAR	9	0	913.535	AT5G07830.1	AT5G07830.1	30	38	yes	yes	2	0.0019753	135.84	1	1	1	1	1	1	182640000	243710000	249020000	439100000	470260000	513250000
ASKPVLGSDHGK	12	1	1194.64	AT3G16470.1;AT3G16470.3;AT3G16470.4;AT3G16470.2	AT3G16470.1	350	361	yes	no	2;3	0.0014797	158.05	1	2	2	2	2	2	63238000	120150000	126110000	124960000	92193000	114740000
ASLAISESPLGTCTR	15	0	1561.78	AT2G04690.3;AT2G04690.2;AT2G04690.1;AT2G04690.5	AT2G04690.3	108	122	yes	no	2;3	1.2762e-52	231.17	3	2	2	2	2	2	1463500000	1360100000	1214200000	1799800000	1693700000	1698500000
ASLGHIAR	8	0	823.466	AT2G32090.1	AT2G32090.1	2	9	yes	yes	2	0.033614	76.134	1		1				15328000	0	14214000	0	0	0
ASLNDLSELFLR	12	0	1376.73	AT1G14540.1	AT1G14540.1	162	173	yes	yes	2	2.9684e-26	204.5	1	1	1	1	1	1	28743000	22027000	27842000	23839000	21589000	19829000
ASLYTTDGGK	10	0	1011.49	AT5G19110.1;AT5G19110.2	AT5G19110.1	123	132	yes	no	2	0.019404	90.761	1		1	1		1	18681000	0	23037000	0	0	6197600
ASNLIYVDQPVGTGFSYTSDQSDLR	25	0	2732.29	AT3G45010.1	AT3G45010.1	172	196	yes	yes	2;3	8.2693e-144	285.59	2	2	2	2	2	3	316690000	290730000	341750000	400870000	255410000	304590000
ASNPFVNLK	9	0	988.534	AT3G02230.1;AT3G08900.1;AT5G50750.1;AT5G15650.1	AT3G02230.1	276	284	no	no	2	0.044106	84.227	1	1	1	1	1	1	13852000	31944000	21907000	14856000	18342000	23901000
ASPETMR	7	0	790.364	AT1G20620.5;AT1G20620.1;AT1G20620.6;AT1G20620.2	AT1G20620.5	111	117	yes	no	2	0.0040938	138.07		1		1		1	0	40908000	0	0	0	80284000
ASPETVADFTLTMLK	15	0	1622.82	AT2G01140.1	AT2G01140.1	274	288	yes	yes	2	0.0082799	72.089			1			1	0	0	4667200	0	0	8296100
ASQASSVAVVLASSESVSNESK	22	0	2136.05	AT4G30920.1	AT4G30920.1	186	207	yes	yes	2;3	2.3134e-17	211.17	2			1	1	1	11757000	0	0	24796000	17394000	15657000
ASQIQFR	7	0	848.45	AT5G63800.1	AT5G63800.1	389	395	yes	yes	2	0.0029939	170.43	1	1	1	1	1	1	1166100000	1540000000	1341100000	2110600000	1820700000	2643400000
ASQSTSAAIVLASSVSDESK	20	0	1936.96	AT2G24200.1;AT2G24200.2;AT2G24200.3	AT2G24200.1	125	144	yes	no	2	1.1966e-83	248.67	1	1	1	1	1	1	63329000	47257000	57846000	58809000	69359000	75712000
ASSAGASVR	9	0	804.409	AT5G66530.4;AT5G66530.3;AT5G66530.2;AT5G66530.1	AT5G66530.4	163	171	yes	no	2	0.059348	95.605				1		1	0	0	0	7201900	0	839500
ASSGDLDNTAIIDQILK	17	0	1772.92	AT5G65620.2;AT5G65620.1;AT5G10540.1	AT5G65620.2	358	374	yes	no	2	1.1455e-09	190.85	1		1	2	1	1	69726000	0	0	62882000	61472000	62184000
ASSMEEVLR	9	0	1020.49	AT1G68010.1;AT1G68010.2;AT1G68010.3	AT1G68010.1	227	235	yes	no	2	1.8411e-05	160.75	2	2	2	2	2	2	128710000	117170000	119290000	90613000	102770000	138430000
ASTFPSGIK	9	0	906.481	AT5G08370.2;AT5G08370.1	AT5G08370.2	74	82	yes	no	1;2	0.0089558	114.39	2	2	1	1	2	2	453730000	572370000	449100000	561480000	742140000	707480000
ASVVALFLGR	10	0	1031.61	AT4G20830.2;AT4G20830.1	AT4G20830.2	311	320	yes	no	1;2	6.2374e-27	221.36	2	1	2	2	2	2	185060000	198110000	251840000	334760000	400990000	280710000
ASWTAVYSTELK	12	0	1354.68	AT1G21680.1	AT1G21680.1	186	197	yes	yes	2	0.0025932	99.568	1	1		1	1	1	8797000	13675000	0	12312000	13596000	12778000
ATAELLFGAGHPVIK	15	0	1522.85	AT4G31990.4;AT4G31990.2;AT4G31990.1;AT4G31990.3	AT4G31990.4	123	137	yes	no	2;3	1.1395e-05	145.46	2	1	2	2	2	2	66866000	43343000	83992000	95578000	120230000	119430000
ATAGDTHLGGEDFDNR	16	0	1674.72	AT3G12580.1;AT1G16030.1;AT5G02500.1;AT5G02500.2	AT3G12580.1	227	242	no	no	2;3	9.5027e-38	170.49	2	2	2	2	2	2	162590000	187380000	161050000	172020000	189780000	174500000
ATAIIGEVADELK	13	0	1328.72	AT5G66090.1	AT5G66090.1	164	176	yes	yes	2	1.9385e-05	130.01	1	1	1	1	1	1	21558000	21349000	25664000	23476000	0	27710000
ATCPIDTLK	9	0	1017.52	AT2G10940.2;AT2G10940.1	AT2G10940.2	206	214	yes	no	1;2	0.00395	137.9	2	2	2	2	2	2	4054300000	3570200000	3546000000	395180000	387180000	330970000
ATDSPLPTVPGYDVAGVVVK	20	0	1984.05	AT1G23740.1	AT1G23740.1	131	150	yes	yes	2	1.7591e-11	199.13	1	1	1	1	1	1	156590000	113310000	138190000	164970000	143550000	160120000
ATDVACSFGGAGVK	14	0	1338.62	AT5G56590.1	AT5G56590.1	428	441	yes	yes	2	0.0013447	97.734		2		1	1	1	0	27147000	0	19228000	23658000	35956000
ATEGPIVADK	10	0	999.524	AT3G27430.1;AT3G27430.2;AT5G40580.2;AT5G40580.1;AT3G27430.3;AT5G40580.4;AT5G40580.3	AT3G27430.1	59	68	yes	no	2	0.004205	120.12	1	1	1	2	2	2	39817000	45694000	37333000	55176000	59300000	49630000
ATEIEVGVVR	10	0	1071.59	AT2G05840.1;AT5G35590.1	AT5G35590.1	212	221	no	no	2	1.7697e-06	149.19	1	1	1	1	1	1	38490000	28176000	34459000	47341000	44015000	40687000
ATENMYGGNVDLK	13	0	1410.64	AT4G39640.2;AT4G39640.1	AT4G39640.2	106	118	yes	no	2	8.6491e-07	178.46	2	2	2	2	2	2	81132000	95098000	88606000	29897000	27625000	35367000
ATETYIFAMFDENSK	15	0	1765.79	AT3G57240.1	AT3G57240.1	302	316	yes	yes	2	1.2955e-34	210.35		1	1	2	1		0	11259000	22803000	22587000	0	0
ATEVVYVLEGELEVGFITTANK	22	0	2381.24	AT1G02335.1	AT1G02335.1	114	135	yes	yes	2;3	5.5181e-225	302.63	2	2	1	3	2	2	29032000	26273000	11836000	40218000	36428000	21523000
ATFDNSEYSK	10	0	1160.5	AT3G55800.1	AT3G55800.1	268	277	yes	yes	2	7.7739e-12	185.72	1	1	1	1	1	1	324900000	313570000	303470000	290530000	403980000	327020000
ATGAYSHSQGIK	12	0	1218.6	AT1G17290.1;AT1G72330.2;AT1G72330.1;AT1G72330.3	AT1G17290.1	169	180	yes	no	2	0.056339	71.524		1	1	1	1	1	0	8320300	6500800	6994300	7638300	8030900
ATGDVAWPK	9	0	943.476	AT1G21670.1	AT1G21670.1	658	666	yes	yes	1	0.028037	113.71	1	1		1	1	1	59049000	38068000	0	70581000	75124000	56340000
ATGIVVVPGSGFR	13	0	1258.7	AT1G17290.1	AT1G17290.1	492	504	yes	yes	2	0.00070065	96.171	1	1	1		1	1	13937000	15884000	17175000	0	17625000	0
ATGQEYAEFLHEFMCAVK	18	0	2129.95	AT5G11670.1	AT5G11670.1	250	267	yes	yes	3	0.003068	45.347	1	1					8027700	5882100	0	0	0	0
ATHQAVVDITGK	12	0	1238.66	AT5G11720.1	AT5G11720.1	524	535	yes	yes	2;3	6.2508e-43	285.24	2	2	2	2	2	2	495800000	434850000	471720000	575810000	746660000	580270000
ATIEVEQVTPVAAENIEVPPPK	22	0	2330.24	AT1G62480.1	AT1G62480.1	2	23	yes	yes	2;3	5.0123e-43	202.82	2	2	2	2	2	2	363740000	365690000	439090000	410540000	436430000	417870000
ATIPDIVNHLASAVR	15	0	1575.87	AT5G14450.1	AT5G14450.1	202	216	yes	yes	3	2.241e-06	106.14	1	1	1	1	1	1	5595900	11427000	10964000	10665000	0	10251000
ATITVVK	7	0	730.459	AT2G36530.1	AT2G36530.1	2	8	yes	yes	1	0.0020079	127.84	1	1	1	1	1	1	49113000	53322000	54947000	38963000	43196000	40063000
ATLDDTTNR	9	0	1005.47	AT3G02870.3;AT3G02870.1;AT3G02870.2	AT3G02870.3	168	176	yes	no	2	0.026577	93.162		1		1	1	1	0	13588000	0	10672000	15461000	9755100
ATLDNDEEK	9	0	1033.46	AT1G55490.5;AT1G55490.4;AT1G55490.3;AT1G55490.2;AT1G55490.1	AT1G55490.5	485	493	yes	no	2	0.00013561	149.65	1	1	1	1	1	1	38695000	35971000	31696000	18002000	18349000	17253000
ATLLANNFELPK	12	0	1329.73	AT4G09670.1	AT4G09670.1	195	206	yes	yes	2	0.00021852	121.9	1	1	1	1	1	1	30823000	19222000	25095000	26853000	26663000	21755000
ATLSGLPDR	9	0	928.498	AT3G54660.1	AT3G54660.1	470	478	yes	yes	2	0.011859	107.01		1	1	1	1	1	0	48880000	48423000	43529000	52674000	0
ATNIGTGGECVGR	13	0	1290.6	AT2G04570.1	AT2G04570.1	227	239	yes	yes	2	0.00083574	101.48	1	1	1	1			0	14678000	14301000	8702000	0	0
ATPAPPVGPALGSK	14	0	1261.7	AT1G32990.1	AT1G32990.1	87	100	yes	yes	2	0.001314	98.156	1	1	1	1	1	1	37370000	12312000	46012000	35165000	10950000	29841000
ATPEQVAAYTLK	12	0	1290.68	AT4G38970.1;AT4G38970.2	AT4G38970.1	281	292	yes	no	1;2	6.847e-12	174.42	2	2	2	2	2	2	738530000	529090000	477040000	671870000	813090000	560100000
ATPEQVASYTLK	12	0	1306.68	AT2G21330.1;AT2G21330.3;AT2G21330.2	AT2G21330.1	282	293	yes	no	1;2	0.0001525	125.97	3	1	1	1	1	1	262900000	374500000	272020000	278880000	309180000	293930000
ATPGHTAGCVTYVTGEGADQPQPR	24	0	2469.13	AT1G53580.2;AT1G53580.1	AT1G53580.2	162	185	yes	no	3	0.0026789	33.187					1		0	0	0	0	24271000	0
ATPLIVHLVDTSSLPLGR	18	0	1888.08	AT2G43910.2;AT2G43910.1	AT2G43910.2	52	69	yes	no	2;3	2.725e-07	105.38	2	2	1	2	2	2	36999000	39249000	30571000	38816000	33325000	37474000
ATQEEVEEK	9	0	1061.49	AT3G19170.1;AT3G19170.2	AT3G19170.1	573	581	yes	no	2	4.8903e-05	157.86	3	3	2	3	2	2	220160000	258860000	211180000	73364000	45513000	75726000
ATQGQVITCK	10	0	1104.56	AT5G43940.1;AT5G43940.2	AT5G43940.1	2	11	yes	no	2	3.3769e-36	234.2	1	1	1	1	1	1	86513000	113000000	95361000	88912000	99141000	77167000
ATSEGEISEK	10	0	1049.49	AT2G47400.1	AT2G47400.1	47	56	yes	yes	2	1.4376e-06	151.44	1	1	1	1	1	1	283670000	221850000	216540000	194510000	199920000	152190000
ATSFSYCLVDR	11	0	1317.6	AT3G18490.1	AT3G18490.1	301	311	yes	yes	2	2.9495e-07	154.85	1	1	1	1	1	1	215780000	95439000	206230000	536780000	467320000	454840000
ATSGTYVTEVPLK	13	0	1364.72	AT4G23670.1;AT4G23680.1;AT4G14060.1;AT2G01530.1;AT2G01520.1;AT3G26460.1;AT1G14950.1	AT4G23670.1	2	14	yes	no	2	8.202e-35	215.89	1	1	1	1	1		200390000	279460000	203860000	151890000	141700000	0
ATSGTYVTQVPLK	13	0	1363.73	AT3G26450.1	AT3G26450.1	2	14	yes	yes	2	3.4799e-05	115.57	1	1	1			1	15926000	22564000	11634000	0	0	0
ATTALLGVPLGHNSSFLEGPALAPPHVR	28	0	2821.52	AT4G08870.1;AT4G08870.2	AT4G08870.1	65	92	yes	no	4	1.3552e-05	62.237	1	1	1	1		1	11097000	15854000	11418000	25832000	0	22094000
ATTHPVVSDK	10	0	1053.55	AT3G14990.3;AT3G14990.2;AT3G14990.1	AT3G14990.3	308	317	yes	no	2	0.0050434	143.21	1	1	1	1	1	1	13767000	19891000	13863000	16254000	13578000	13150000
ATVEVEQVTPVAVENVEVPTK	21	0	2237.18	AT1G12080.2;AT1G12080.1	AT1G12080.2	2	22	yes	no	2;3	3.2932e-33	238.83	2	2	2	2	2	2	466440000	457040000	497760000	388420000	386140000	363840000
ATVPLNADVYDSPASNPVPSAGR	23	0	2297.13	AT1G64760.2;AT1G64760.1	AT1G64760.2	155	177	yes	no	2;3	8.1056e-06	102.78		1		1	1	1	0	38613000	0	19717000	0	0
ATVVALFLGR	10	0	1045.63	AT4G20840.1	AT4G20840.1	310	319	yes	yes	2	9.5606e-07	154.71	1	1	1	1	1	1	6735100	14251000	24737000	21528000	33725000	14169000
ATYHFYNPAQNNWDLR	16	0	2008.92	AT3G04720.1	AT3G04720.1	79	94	yes	yes	3	0.001201	64.565	1				1	1	18584000	0	0	0	33170000	21633000
AVAAPAPEATEEK	13	0	1282.64	AT1G22530.1;AT1G22530.2	AT1G22530.1	36	48	yes	no	2	0.00010262	114.83	1	1	1	1	1		17343000	23024000	20005000	14852000	13058000	0
AVADYVHSK	9	0	988.498	AT5G08380.1;AT5G08380.2	AT5G08380.1	123	131	yes	no	2	0.00084532	143.45	1	1	1	1	1	1	432610000	507090000	506670000	577810000	624590000	564790000
AVAHQPISIAIEAGGR	16	0	1588.87	AT1G47128.1	AT1G47128.1	262	277	yes	yes	2;3	1.6149e-05	183.06	2	1	2	2	2	2	355950000	149510000	390540000	352050000	379380000	346680000
AVAIAVGDWYFDR	13	0	1481.73	AT3G05910.1;AT5G26670.1;AT5G26670.4;AT5G26670.3;AT5G26670.2	AT3G05910.1	381	393	yes	no	2	8.8437e-42	221.68	1	1	1	1	1	1	399290000	296410000	437900000	0	373340000	371350000
AVAPDLR	7	0	740.418	AT2G26740.1;AT2G26750.1;AT3G05600.2;AT3G05600.1	AT2G26740.1	53	59	yes	no	2	0.024885	114.02	1		1	1	1	2	24872000	0	26083000	28714000	37325000	44629000
AVASAYGSFPTTVIDSK	17	0	1712.86	AT1G20160.1;AT1G20160.2;AT1G20160.3	AT1G20160.1	441	457	yes	no	2	1.9333e-08	152.47	1	1	1	1	1	1	248260000	341460000	311770000	324030000	299200000	316840000
AVASISAGNDDLIGSMIADAIDK	23	0	2246.11	AT2G28000.1	AT2G28000.1	190	212	yes	yes	2;3	1.3369e-11	175.26	2	2	2	1		2	26971000	14846000	23384000	8663600	0	19945000
AVAWVGESGGAYNSGR	16	0	1579.74	AT5G34940.2;AT5G34940.3;AT5G34940.1;AT5G34940.4	AT5G34940.2	313	328	yes	no	2	2.5416e-37	208.74	1	1	1	1	1	1	153530000	179710000	141360000	198980000	182910000	157300000
AVDIIGFGTGAEVEK	15	0	1504.78	AT2G24200.1;AT2G24200.2	AT2G24200.1	176	190	yes	no	2	3.9743e-13	172.11	1	1	1	1	1	1	81757000	87863000	91005000	78449000	96721000	90199000
AVDKDELTVEER	12	1	1402.69	AT4G09000.1;AT4G09000.2	AT4G09000.1	39	50	yes	no	2;3	3.1058e-41	231.92	1	1		2	2	2	61801000	40751000	0	70658000	74070000	72975000
AVDNSGTVVGIK	12	0	1158.62	AT2G27020.1;AT2G27020.2	AT2G27020.1	30	41	yes	no	2	7.909e-06	140.07	1	1	1	1	1	1	42185000	60541000	46625000	38521000	43110000	38570000
AVDPQLEVVNK	11	0	1210.66	AT1G80380.3;AT1G80380.8;AT1G80380.4;AT1G80380.2;AT1G80380.1;AT1G80380.7;AT1G80380.6;AT1G80380.5	AT1G80380.3	257	267	yes	no	2	0.015524	82.645	1			1			15658000	0	0	0	0	0
AVEAIKPGMVLGLGTGSTAAFAVDQIGK	28	1	2700.45	AT3G04790.1	AT3G04790.1	56	83	yes	yes	3	6.7209e-18	144.7	1	1	1	1	1	1	36663000	17476000	9196200	19901000	27119000	26516000
AVEATLK	7	0	730.423	AT4G34260.1	AT4G34260.1	670	676	yes	yes	2	0.048814	97.473	1	1	1	1	1	1	119130000	124010000	130270000	118850000	104150000	85768000
AVEGEGNFVEPTIIEISADAAVVK	24	0	2457.26	AT1G54100.2;AT1G54100.1	AT1G54100.2	371	394	yes	no	3	0.0026279	44.474	1						8832700	0	0	0	0	0
AVELDTESDGSQIQSGLAEWTGQR	24	0	2576.2	AT5G40370.1;AT5G40370.2	AT5G40370.1	42	65	yes	no	2;3	1.0121e-37	197.17	1	1	2				0	0	64547000	0	0	0
AVELVAGK	8	0	785.465	AT5G11420.1;AT4G32460.4;AT4G32460.3;AT4G32460.2;AT4G32460.1	AT5G11420.1	254	261	yes	no	2	0.024753	104.45	1	1	1	1	1	1	1452900000	1504800000	1500200000	1166700000	1196600000	1085300000
AVESEEVTTVSESLPAPVTESQAPVEVTTK	30	0	3113.55	AT1G62480.1	AT1G62480.1	24	53	yes	yes	2;3;4	9.5999e-117	285.47	3	3	4	3	3	3	2132900000	2363300000	2603200000	1567100000	1629900000	1692000000
AVGDWFFER	9	0	1125.52	AT5G45280.2	AT5G45280.2	359	367	yes	yes	2	5.5439e-15	201.39	1	1	1	1	1	1	858380000	1005800000	848570000	808880000	859170000	873120000
AVGGSSLENGQIELMLHR	18	0	1909.97	AT3G26720.1;AT3G26720.2;AT3G26720.5;AT3G26720.4;AT3G26720.3	AT3G26720.1	788	805	yes	no	3	0.028702	40.186	1		1	1	1	1	14459000	0	11353000	17246000	21907000	23686000
AVGNVNNIIGPALIGK	16	0	1548.9	AT2G36530.1;AT2G36530.2	AT2G36530.1	66	81	yes	no	2	0.0014469	139.15	1	1	1	1	1	1	84962000	75692000	92379000	65297000	67601000	77029000
AVGNWFYGR	9	0	1068.51	AT4G19410.1;AT4G19410.2	AT4G19410.1	359	367	yes	no	2	1.9708e-07	208.61	1	1	1	1	1	1	213880000	282220000	250970000	146160000	168580000	144480000
AVGPGLNTAR	10	0	954.525	AT2G38530.1	AT2G38530.1	83	92	yes	yes	1;2	2.3185e-14	187.78	1	2	2	2	2	2	1913900000	2303700000	2022500000	1795200000	1728400000	1832500000
AVGPIVDGDAVVTFNFR	17	0	1775.92	AT3G08590.2;AT3G08590.1;AT1G09780.1	AT3G08590.2	271	287	no	no	2	5.3068e-05	161.1	1	1	1	1	1	1	9574700	6690700	13576000	17490000	20895000	15673000
AVGSCSECSYTGTFR	15	0	1680.69	AT3G13750.1	AT3G13750.1	670	684	yes	yes	2	2.8364e-122	291.66	1	1	1	1	1	1	441220000	479730000	434840000	677290000	669760000	552840000
AVGVNSIVLFPK	12	0	1242.73	AT1G69740.3;AT1G69740.2;AT1G69740.1	AT1G69740.3	170	181	yes	no	2	0.0021337	101.9	1	1	1	1			8409600	6774200	8544600	0	0	0
AVIDDLMAK	9	0	974.511	AT5G45280.2;AT5G45280.1	AT5G45280.2	149	157	yes	no	1;2	0.0068113	121.99	3	3	3	3	3	3	1665200000	1297100000	1422500000	881490000	984870000	1278000000
AVIFSDAGPDVR	12	0	1245.64	AT2G28100.1	AT2G28100.1	219	230	yes	yes	1;2	1.8221e-08	179.8	2	1	2	2	1	2	273870000	375270000	304420000	399140000	368630000	422900000
AVIINGQR	8	0	869.508	AT4G26140.9;AT4G26140.1;AT4G26140.7;AT4G26140.3;AT4G26140.2;AT4G26140.6;AT4G26140.8;AT4G26140.5;AT4G26140.4;AT5G56870.1	AT5G56870.1	35	42	no	no	2	0.028809	101.33	1	1	1	1	1	1	24080000	25992000	19794000	33934000	39075000	39450000
AVIISWVTPDEPGSSQVHYGAVQGK	25	0	2624.32	AT5G34850.1	AT5G34850.1	68	92	yes	yes	3	6.2915e-11	130.71	1	1	1	1	1	1	82963000	74380000	100770000	110520000	97059000	126580000
AVLEFIR	7	0	846.496	AT4G24350.1;AT4G24350.3	AT4G24350.1	325	331	yes	no	2	0.010261	129.96	1	1	1	1	1	1	141420000	175840000	152990000	130270000	132420000	141230000
AVLIDKDQNPK	11	1	1239.68	AT4G13360.1	AT4G13360.1	381	391	yes	yes	2	0.047208	118.71			1	1	1	1	0	0	9317700	0	6875400	9559900
AVLSSSGFQADVK	13	0	1307.67	AT3G60820.3;AT3G60820.2;AT3G60820.1	AT3G60820.3	56	68	yes	no	2	1.5619e-05	131.28	1	1	1	1	1	1	39503000	50966000	39077000	48627000	52677000	53283000
AVLYGSGNAYAPSLGLAAAK	20	0	1893	AT4G23600.1;AT4G23600.3	AT4G23600.1	64	83	yes	no	2	0.0045666	66.285						1	0	0	0	0	0	25473000
AVNAGLLK	8	0	784.481	AT5G04140.1;AT5G04140.2	AT5G04140.1	816	823	yes	no	2	0.00799	128.38	1	1	1	1	1	1	109530000	83632000	99251000	101360000	112010000	88098000
AVNALEQHIK	10	0	1121.62	AT3G02230.1;AT5G15650.1	AT3G02230.1	123	132	no	no	2	0.0052995	115.71	1	1	1	1	1	1	45344000	43762000	34134000	26238000	34390000	25468000
AVNDQGLGPIPK	12	0	1207.66	AT4G21650.1	AT4G21650.1	171	182	yes	yes	2	0.007257	87.806	1	1		1			91839000	0	0	0	0	0
AVNFGANSENMQVLVTGLDPNVMR	24	0	2575.25	AT3G10740.3;AT3G10740.1;AT3G10740.4;AT3G10740.2	AT3G10740.3	578	601	yes	no	3	2.4754e-10	125.77	1	1	1			1	37136000	16304000	31999000	0	0	25427000
AVPIPGSGLQLTNISHVR	18	0	1858.04	AT3G63140.1	AT3G63140.1	260	277	yes	yes	2;3	0.00012156	136.99	2	2	2	2	2	1	145880000	121180000	151710000	146390000	144230000	143170000
AVPTNQDLDTEPK	13	0	1426.69	AT3G05900.1;AT3G05900.2	AT3G05900.1	435	447	yes	no	2	2.5194e-05	128.03	1	1	1	1	1	1	33881000	62070000	45677000	29032000	37691000	31596000
AVQDTWNWPLIDPLPSYGR	19	0	2227.11	AT4G23820.1	AT4G23820.1	108	126	yes	yes	2	0.00080776	107.65	1						19045000	0	0	0	0	0
AVQVQNLAYPEDPNDPLLLK	20	0	2236.17	AT1G12240.1	AT1G12240.1	217	236	yes	yes	2;3	2.5352e-23	180.48	1	2	2	1	2	2	29518000	40210000	50133000	24082000	56973000	48055000
AVSAIVSCLLGPER	14	0	1470.79	AT3G48420.1	AT3G48420.1	204	217	yes	yes	2;3	2.5156e-34	253.71	2	2	2	2	2	2	74898000	54949000	72325000	109480000	96478000	95970000
AVSEADVTVLVVGLDQTVEAEGLDR	25	0	2584.32	AT3G19620.1	AT3G19620.1	478	502	yes	yes	2;3	7.6349e-214	406.97	4	2	6	9	8	5	1921400000	1042400000	1917200000	2977000000	2622400000	2846300000
AVSHFPTAVK	10	0	1055.58	AT1G16080.1	AT1G16080.1	266	275	yes	yes	2;3	2.0923e-09	168.8	2	1	2	2	2	1	112610000	52067000	68677000	109890000	115190000	44704000
AVSIKPEAGVEGLNIADNAAQLIGK	25	1	2477.35	AT2G43750.2;AT2G43750.1	AT2G43750.2	61	85	yes	no	3	0.0061853	44.183	1		1		1	1	12099000	0	16490000	0	18613000	16300000
AVSSLGIK	8	0	773.465	AT3G57240.1	AT3G57240.1	148	155	yes	yes	2	0.0019739	154.01	1	1	1	1	1	1	81494000	111990000	83219000	139790000	170200000	117290000
AVSVEENPHAIPTR	14	0	1518.78	AT2G43910.2;AT2G43910.1;AT2G43910.3	AT2G43910.2	201	214	yes	no	2;3	4.0932e-13	151.26	2	2	2	2	2	2	115140000	173140000	136930000	122040000	104930000	129530000
AVTIALK	7	0	714.464	AT4G37930.1	AT4G37930.1	456	462	yes	yes	2	0.03107	108.98	1	1	1	1	1	1	86241000	89760000	99150000	108570000	105030000	99020000
AVTLTLDIQK	10	0	1100.64	AT4G13930.1	AT4G13930.1	415	424	yes	yes	2	0.020238	82.75			1	1	1		0	0	11958000	0	11766000	0
AVVDDLMAK	9	0	960.495	AT4G19410.1;AT4G19410.2	AT4G19410.1	149	157	yes	no	2	0.0099893	109.86	2	2	2	2	2	2	2008600000	2062000000	1889900000	623610000	711010000	978020000
AVVVHADPDDLGK	13	0	1334.68	AT1G08830.2;AT1G08830.1	AT1G08830.2	115	127	no	no	2;3	2.0797e-27	208.6	2	2	2	2	2	2	1196100000	987700000	920670000	925820000	837160000	975640000
AVVWDGVHFTQAANK	15	0	1641.83	AT1G67830.1	AT1G67830.1	341	355	yes	yes	3	7.0281e-07	111.83	2	1		1	1		0	57699000	0	56513000	37575000	0
AVYECLR	7	0	909.438	ATCG00490.1;AT2G07732.1	ATCG00490.1	188	194	yes	no	2	0.0043925	160.69	1	1	2	2	1	2	8006600000	0	8718700000	9787100000	9631800000	10273000000
AVYEFPEFDQQIGESAGPECK	21	0	2400.06	AT4G36195.1;AT4G36195.3;AT4G36195.2	AT4G36195.1	206	226	yes	no	2;3	6.0738e-69	230.36	1	2	2	1	2	2	34371000	88348000	110630000	62489000	179620000	109490000
AWIEYNNNYK	10	0	1313.6	AT1G53070.1	AT1G53070.1	206	215	yes	yes	2	2.8263e-17	183.24	1	1	1	1	1	1	128570000	105760000	0	156610000	0	177750000
AWQHEEADSLYVEEVDIGEAEPR	23	0	2671.2	AT3G59980.1	AT3G59980.1	119	141	yes	yes	3	1.3331e-08	99.441	1						14442000	0	0	0	0	0
AWVYSDYGGVDVLK	14	0	1570.77	AT1G23740.1	AT1G23740.1	80	93	yes	yes	2	0.0019254	89.548	1	1	1	1	1	1	43639000	58326000	50955000	57488000	86941000	68342000
AYEIATTAAEAK	12	0	1237.62	AT2G42590.1;AT2G42590.3;AT2G42590.2	AT2G42590.1	154	165	yes	no	2	2.3824e-08	135.55	1	1	1	1	1	1	32304000	0	33416000	27869000	0	34360000
AYIEALNEDPK	11	0	1261.62	AT2G20890.1	AT2G20890.1	139	149	yes	yes	2	0.0002467	121.64	1	1	1	1	1	1	0	32059000	0	0	0	0
AYQEQVLSNSAK	12	0	1336.66	AT4G37930.1	AT4G37930.1	354	365	yes	yes	2	1.2122e-33	219.03	1	1	1	1	1	1	129320000	161270000	145890000	182350000	188330000	180200000
AYSASLDEFGAVGDGVTSNTAAFR	24	0	2405.11	AT4G23500.1	AT4G23500.1	65	88	yes	yes	2;3	0	370.21	2	1	2	1	1		100350000	43472000	102780000	0	49970000	0
AYSYFPAATYLK	12	0	1393.69	AT1G78830.1	AT1G78830.1	305	316	yes	yes	2	2.1993e-08	150.08	1	1	1	1	1	1	91684000	99926000	99987000	90815000	87604000	104770000
AYTLDSSLDGLSFR	14	0	1543.75	AT4G18930.1	AT4G18930.1	139	152	yes	yes	2	2.0139e-05	138.71	1	1	1	1	1	1	21076000	18796000	20454000	28559000	35899000	23698000
AYTYPINIQELANL	14	0	1621.84	AT1G33811.1	AT1G33811.1	357	370	yes	yes	2	2.7067e-19	183.13	1	1	1				44693000	44432000	44582000	0	0	0
AYVDNLK	7	0	821.428	AT4G25100.5;AT4G25100.3;AT4G25100.2;AT4G25100.1;AT4G25100.4	AT4G25100.5	42	48	yes	no	1	0.052718	138.24	1	1	1	1	1	1	17635000	12945000	12739000	20198000	19677000	15766000
CAGAGGAPPATLAEFTIGSSGK	22	0	2018.97	AT1G19320.1	AT1G19320.1	102	123	yes	yes	2;3	2.7037e-08	174.17	1	2	1	2	2	1	21399000	25716000	18755000	45940000	30703000	29863000
CAIGFAPGIECNEDVK	16	0	1778.8	AT1G14210.1	AT1G14210.1	174	189	yes	yes	2	0.0014722	99.539	1	1	1	1	1	1	20456000	24952000	26899000	34660000	0	35646000
CAVFSNR	7	0	852.391	AT5G19890.1	AT5G19890.1	200	206	yes	yes	2	0.036796	105.27					1		0	0	0	0	8486300	0
CCDAVEDIK	9	0	1108.45	AT1G27950.1	AT1G27950.1	60	68	yes	yes	2	1.9114e-07	182.53	1	1	1	1	1	1	117280000	110950000	115750000	77290000	71214000	76987000
CCDAVEDIKER	11	1	1393.6	AT1G27950.1	AT1G27950.1	60	70	yes	yes	2;3	2.5349e-17	188.87	1	2	2	1		1	0	60146000	74049000	45825000	0	32208000
CGAEIEFPSF	10	0	1155.49	AT2G02990.1	AT2G02990.1	221	230	yes	yes	2	0.0001434	143	1	1	1	1	1	1	39424000	38138000	31862000	13890000	11999000	12047000
CGDQTLISAAVK	12	0	1261.63	AT3G19620.1	AT3G19620.1	466	477	yes	yes	1;2	3.1898e-66	257.72	2	1	1	2	2	2	299190000	270230000	253090000	389530000	412020000	404010000
CGETFPGPNSPNKPK	15	1	1628.76	AT5G63800.1	AT5G63800.1	241	255	yes	yes	3	1.536e-08	157.38	1	1	1	1	1	1	119620000	155930000	143080000	167100000	133650000	179750000
CGIAIEPSYPIK	12	0	1346.69	AT1G47128.1	AT1G47128.1	342	353	yes	yes	2	0.001443	105.4	1	1	1	1	1		0	22517000	31648000	0	0	0
CGVFNNR	7	0	865.386	AT5G06720.1	AT5G06720.1	206	212	yes	yes	2	0.006342	145	1	1	1	1	1	1	33101000	35010000	40430000	30118000	32984000	35577000
CISNRPIR	8	1	1014.54	AT4G12880.2;AT4G12880.1	AT4G12880.2	42	49	yes	no	2	0.014082	166.45	1	1	1	1		1	108000000	111870000	0	96812000	0	114170000
CLCFVIQQAK	10	0	1265.63	AT1G27950.1	AT1G27950.1	74	83	yes	yes	2	0.00011341	170.06	1	1		1	1	1	33692000	20449000	0	23050000	27836000	23811000
CLDTQPSDHGSPNSR	15	0	1669.71	AT2G34810.1	AT2G34810.1	38	52	yes	yes	2;3	5.6669e-19	188.06	2	2	1	1	2	2	36695000	43278000	16297000	21067000	34898000	45339000
CLGFFYNR	8	0	1075.49	AT1G78850.1;AT1G78860.1	AT1G78850.1	397	404	no	no	2	0.007361	129.96	1	1	1	1	1	1	89372000	81468000	83826000	77250000	64774000	87317000
CLGYFYK	7	0	949.437	AT1G78830.1;AT1G78820.1	AT1G78830.1	420	426	no	no	1;2	0.051113	140.79	2	1	2	1	2	1	301000000	247020000	264980000	228890000	281100000	208250000
CLLAPLLGTLIK	12	0	1310.8	AT1G78830.1;AT1G78820.1	AT1G78830.1	432	443	no	no	1;2	1.8519e-08	151.83	2	1	2	2	2	2	437130000	358250000	437190000	430730000	436440000	443770000
CLSDAGFFLDAIDVSGGR	18	0	1898.88	AT1G57590.1	AT1G57590.1	250	267	yes	yes	2	9.6216e-29	192.14	1	1	1	1	1		10278000	8031600	7998400	8520200	6096400	0
CLSDAGLFLDTADVSGGR	18	0	1852.86	AT3G05910.1;AT3G05910.2	AT3G05910.1	222	239	yes	no	2;3	3.8248e-209	340.12	3	3	3	3	3	2	787080000	617710000	749800000	751450000	620480000	685160000
CLSDAGMFLDSVDVSGGHSLR	21	0	2222.01	AT3G62060.1;AT3G62060.2	AT3G62060.1	225	245	yes	no	3	0.052634	41.257						1	0	0	0	0	0	24565000
CLSHCGEPSQR	11	0	1329.56	AT3G52840.1;AT3G52840.2	AT3G52840.1	680	690	yes	no	2;3	7.0095e-75	278.44	2	2	2	2	2	2	99535000	118620000	116300000	112730000	151570000	149330000
CLSNCGEASQR	11	0	1280.52	AT4G26140.9;AT4G26140.1;AT4G26140.7;AT5G56870.1	AT5G56870.1	680	690	no	no	2	1.1032e-102	294.11	1	1	1	1	1	1	216730000	220460000	234720000	260550000	238260000	338670000
CLTGCGEPSQR	11	0	1263.53	AT5G63810.1	AT5G63810.1	692	702	yes	yes	2	4.6874e-08	171.56	1	1	1	1	1	1	33085000	53451000	40965000	30106000	36097000	30162000
CLYQVSYGDGSFTVGELATDTVTFGNSGK	29	0	3072.4	AT3G18490.1	AT3G18490.1	235	263	yes	yes	2;3	2.3873e-83	165.48			1	1	1	2	0	0	13210000	41091000	43582000	48941000
CNGGGVPPVTLAEFTLVGDGGK	22	0	2144.06	AT1G75040.1;AT1G75050.1	AT1G75040.1	99	120	yes	no	2;3	5.7229e-09	124.16	3	3	2	2	2	2	125630000	93193000	44635000	95370000	92162000	74427000
CNGGGVPPVTLAEFTLVGDGGKDFYDVSLVDGYNVK	36	1	3758.81	AT1G75040.1	AT1G75040.1	99	134	yes	yes	3	2.9159e-13	76.478				1	1	1	0	0	0	16159000	13042000	11241000
CNHGESFQEGK	11	0	1291.53	AT3G19710.1	AT3G19710.1	40	50	yes	yes	2	0.015987	84.31				1	1	1	0	0	0	7868500	11685000	6147200
CNSAVCSR	8	0	952.385	AT1G03220.1;AT1G03230.1	AT1G03220.1	86	93	no	no	2	3.6905e-05	183.04	1	1	1	1	1	1	105730000	81888000	88505000	90808000	93261000	93408000
CNYAGIYNEK	10	0	1230.53	AT3G52840.1;AT3G52840.2	AT3G52840.1	669	678	yes	no	2	0.00062886	134.05				1	1	1	0	0	0	123750000	136350000	131380000
CNYAGTFDAK	10	0	1145.48	AT5G56870.1	AT5G56870.1	669	678	yes	yes	2	0.0026886	126.07	1	1	1	1	1	1	46610000	65830000	62526000	81900000	70738000	89130000
CPALLHLDPNSPDAQVFYQLAK	22	0	2496.25	AT2G44300.1;AT2G44290.1	AT2G44300.1	112	133	yes	no	3	9.88e-06	92.671				1	1		0	0	0	30968000	0	0
CPFIDGEFDCLK	12	0	1499.64	AT1G29050.1	AT1G29050.1	82	93	yes	yes	2	1.0962e-05	136.96		1		1	1	1	0	16290000	0	27555000	28891000	22919000
CPGIVSCADIITLATR	16	0	1745.88	AT4G11290.1	AT4G11290.1	114	129	yes	yes	2	1.7406e-19	184.1	1	1	1	1	1	1	91763000	48575000	69885000	102890000	90952000	89526000
CPGPQQFAPLLAPPDTVPR	19	0	2060.05	AT1G21880.2	AT1G21880.2	325	343	yes	yes	2	0.00013173	129.54	1	1	1	1	1	1	15650000	11415000	0	0	12309000	12810000
CPNQEVYIEEILR	13	0	1661.81	AT4G33810.5;AT4G33810.1;AT4G33810.4;AT4G33810.3;AT4G33810.2	AT4G33810.5	405	417	yes	no	2;3	2.3199e-64	254.34		1	2	1	1	2	0	85791000	0	125290000	131270000	111870000
CRPAVTGNNPPPPGPDCCAVAR	22	1	2362.07	AT5G55450.1	AT5G55450.1	44	65	yes	yes	3	0.0025572	36.677		1					0	20311000	0	0	0	0
CSAAQLK	7	0	776.385	AT4G19410.1;AT4G19410.2	AT4G19410.1	296	302	yes	no	2	0.00085444	178.24	1	1	1	1	1	1	338710000	335040000	321940000	189320000	171010000	178800000
CSDAHAIADAASK	13	0	1315.58	AT4G33010.1;AT4G33010.2	AT4G33010.1	463	475	yes	no	2;3	3.924e-64	247.3	2	2	2	2	2	2	73649000	68031000	24301000	59743000	58687000	68067000
CSDIEGSFTSK	11	0	1229.52	AT3G22060.1	AT3G22060.1	39	49	yes	yes	2	1.933e-11	174.8	1	1	1				89600000	150160000	87980000	0	0	0
CSHGIAQVGNK	11	0	1169.56	AT3G16400.2;AT3G16400.1;AT3G16390.2;AT3G16390.1	AT3G16400.2	167	177	yes	no	2;3	1.7525e-72	266.54	2	2	2	2	1	2	123450000	122420000	98199000	114460000	36180000	97436000
CSQWVDK	7	0	921.401	AT5G25980.3;AT5G25980.1;AT5G25980.2	AT5G25980.3	236	242	yes	no	2	0.0064568	143.61	1		1	1	1	1	36382000	0	38431000	26091000	23030000	25321000
CSQWVDKR	8	1	1077.5	AT5G25980.3;AT5G25980.1;AT5G25980.2	AT5G25980.3	236	243	yes	no	2	1.5706e-17	241.52	1	1	1	1	1	1	48079000	0	42589000	41958000	37012000	0
CSYAGTFTEK	10	0	1162.5	AT4G26140.9;AT4G26140.1;AT4G26140.7	AT4G26140.9	695	704	yes	no	2	4.1477e-09	163.32	1	1	1	1	1	1	27580000	38061000	38786000	39966000	31438000	44954000
CTAAQLQTVQGYR	13	0	1494.72	AT5G45280.2	AT5G45280.2	296	308	yes	yes	2	4.3135e-130	373.4	1	1	1	1	1	1	556500000	707860000	529950000	608020000	585800000	594870000
CTGLTIQGK	9	0	976.501	AT5G13980.1;AT5G13980.2;AT5G13980.3	AT5G13980.1	832	840	yes	no	2	5.8572e-06	169.06	1	1	1	1	1	1	115310000	122610000	93802000	138550000	121980000	106220000
CTPAQLR	7	0	844.423	AT3G05910.1	AT3G05910.1	322	328	yes	yes	2	0.046757	98.807	1	1	1	1	1	1	168470000	224330000	174240000	165860000	152440000	155620000
CVCILVR	7	0	918.478	AT1G55260.2;AT1G55260.1	AT1G55260.2	115	121	yes	no	2	0.045673	99.511	1		1	1	1	1	14309000	0	18105000	16369000	17348000	10139000
CVKPPVIYGDVSR	13	1	1488.78	AT3G03780.3;AT3G03780.2;AT3G03780.1;AT5G17920.2;AT5G17920.1	AT5G17920.2	522	534	no	no	2;3	0.0005049	112.15	1	2	2	2	1	2	0	43661000	23856000	45544000	21812000	20931000
CVKPPVIYGDVSRPK	15	2	1713.92	AT3G03780.3;AT3G03780.2;AT3G03780.1;AT5G17920.2;AT5G17920.1	AT5G17920.2	522	536	no	no	3	0.013722	76.01				1			0	0	0	34757000	0	0
CVLDTSK	7	0	821.395	AT5G43940.1;AT5G43940.2	AT5G43940.1	373	379	yes	no	2	0.043774	100.74	1	1		1			13530000	14023000	0	14865000	0	0
CVSDAGYFIHGK	12	0	1352.62	AT4G19410.1;AT4G19410.2;AT5G45280.2;AT5G45280.1	AT4G19410.1	196	207	no	no	2;3	4.7067e-14	192.64	2	2	2	2	2	2	1015400000	1052300000	899610000	970370000	738830000	810010000
CVTGDCGGLR	10	0	1093.46	AT1G75040.1	AT1G75040.1	89	98	yes	yes	1;2	6.492e-15	196.77	2	3	2	2	3	2	1633000000	2543400000	1691200000	2106200000	2177400000	1891400000
CVVVEDSAIGLAAAK	15	0	1501.78	AT3G48420.1	AT3G48420.1	253	267	yes	yes	2	1.7981e-13	147.74	1	1	1		1	1	51527000	35097000	43859000	0	0	49679000
CWLGYELK	8	0	1067.51	AT1G78850.1;AT1G78860.1	AT1G78850.1	409	416	no	no	2	0.0033076	143.85	1	1	1	1	1	1	228420000	231590000	202900000	251560000	249640000	182460000
CYGGDSSTEPYIVAHNQLLAHATVVDLYR	29	0	3248.56	AT5G25980.3;AT5G25980.1;AT5G25980.2	AT5G25980.3	244	272	yes	no	3;4	2.515e-28	168.57	1			2	1	1	35613000	0	0	108790000	52361000	35407000
DAAAAAGASAQQAGK	15	0	1286.62	AT5G15970.1	AT5G15970.1	31	45	yes	yes	2	0.00039058	165.3	1	1	1	1	1	1	28934000	40482000	27543000	32312000	37830000	33219000
DAAALGAFCLDGSLPAYHLDR	21	0	2232.06	AT5G23870.4;AT5G23870.1;AT5G23870.2;AT5G23870.3	AT5G23870.4	42	62	yes	no	2;3	1.8444e-11	193.96	2	1	1	2	2	2	36060000	21315000	30855000	64885000	55036000	70027000
DAAEHTLAAYK	11	0	1188.58	AT1G78300.1	AT1G78300.1	146	156	yes	yes	2	0.0042211	109.88		1			1		0	0	0	0	11190000	0
DAAEHTLTAYK	11	0	1218.59	AT1G35160.1;AT1G35160.2;AT4G09000.1;AT4G09000.2	AT4G09000.1	151	161	no	no	2;3	1.9234e-11	174.86	2	2	2	2	2	2	41141000	47194000	43766000	39199000	32529000	42374000
DAATVTSADFFSQGLAK	17	0	1727.84	AT1G09560.1	AT1G09560.1	49	65	yes	yes	2;3	6.758e-74	240.12	1	2	1	1	1	1	138760000	139560000	135290000	101250000	77419000	89115000
DACGGTSCFVIENYDGPGR	19	0	2073.85	AT5G13690.1;AT5G13690.2	AT5G13690.1	72	90	yes	no	2;3	1.859e-186	318.88	1	2	2	1	2	2	34475000	14868000	42031000	52164000	78553000	57430000
DACIVLDDADLDLVASNIIK	20	0	2172.1	AT2G24270.3;AT2G24270.1;AT2G24270.4;AT2G24270.2	AT2G24270.3	269	288	yes	no	2;3	4.0613e-16	204.28	1	2	2	2	2	1	45264000	11394000	53642000	65694000	63769000	29654000
DADFSTVDAVFCCLPHGTTQEIIK	24	0	2723.26	AT2G19940.3;AT2G19940.1	AT2G19940.3	107	130	yes	no	3	5.0443e-09	89.721		1	1		1	1	0	27603000	0	0	0	52678000
DADGHGTHTSSTAAGR	16	0	1539.67	AT4G34980.1	AT4G34980.1	201	216	yes	yes	2;3	0.00075778	116.24	2	1	2	2	2	2	17309000	12945000	15935000	5958000	6188100	5282100
DAFGNANSAR	10	0	1021.46	AT3G49120.1;AT4G08770.1;AT4G08780.1	AT3G49120.1	96	105	no	no	2	0.0065317	110.76	1	1	1	1	1	1	85511000	79638000	76797000	38660000	45298000	57426000
DAGQELLSR	9	0	987.499	AT5G08280.1	AT5G08280.1	366	374	yes	yes	2	1.9013e-11	199.68	1	1	1	1	1	1	59642000	81153000	0	44699000	48673000	49450000
DAGTGSLLASLAEAAFLIGLEK	22	0	2146.15	AT3G10740.3;AT3G10740.1;AT3G10740.4;AT3G10740.2	AT3G10740.3	472	493	yes	no	2	1.0879e-83	299.58	1		1	1		1	135170000	0	522550000	803250000	0	424820000
DAGVIAGLNVAR	12	0	1154.64	AT5G28540.1;AT5G42020.3;AT5G42020.1;AT5G42020.2	AT5G42020.3	197	208	no	no	2	6.4221e-09	143.7	1	1	1	1	1	1	0	25908000	36546000	26880000	24688000	28801000
DAHPSVYGLGGR	12	0	1227.6	AT3G14850.2;AT3G14850.1	AT3G14850.2	317	328	yes	no	2	0.02286	94.309		1	1		1		0	69517000	57398000	0	93823000	0
DAHYLTGLLPPVILSQDVQER	21	0	2363.25	AT5G11670.1	AT5G11670.1	70	90	yes	yes	3	2.0165e-24	182.82	1	1	1	1	1	1	60937000	43898000	70069000	72812000	54630000	67624000
DAIADGIEAR	10	0	1029.51	AT1G17290.1	AT1G17290.1	184	193	yes	yes	2	0.0222	87.754	1	1	1	2	2	2	443870000	381880000	386950000	578440000	641530000	549630000
DAIGLCFPDVK	11	0	1233.61	AT5G55480.1	AT5G55480.1	92	102	yes	yes	2	0.014495	96.89		1	1			1	0	20909000	16331000	0	0	0
DAILLAAQDLNEYPILK	17	0	1899.04	AT3G61490.3;AT3G61490.2;AT3G61490.1;AT3G61490.5;AT3G61490.4	AT3G61490.3	107	123	yes	no	2	9.2163e-06	143.86				1	1	1	0	0	0	9408800	11407000	7735700
DAITPGSYFGNEIPDSIAIIK	21	0	2220.13	AT4G30530.1	AT4G30530.1	133	153	yes	yes	2	6.1467e-05	72.523	1	1	1	1	2	1	6316500	7158200	11688000	0	8741800	10617000
DALIALGCMEHR	12	0	1384.66	AT5G04140.1;AT5G04140.2	AT5G04140.1	125	136	yes	no	2	5.0655e-13	167.93	1	2	2	1	2	2	47052000	45910000	70249000	0	27924000	90134000
DALIPTGTVI	10	0	998.565	AT5G48300.1	AT5G48300.1	511	520	yes	yes	2	0.01834	91.906	1	1	1	1			6305400	7645700	0	5886000	0	0
DALLANEATK	10	0	1044.55	AT1G35720.1	AT1G35720.1	88	97	yes	yes	2	0.01435	96.331			1				0	0	53539000	0	0	0
DALPVVTHIVMR	12	0	1349.75	AT3G16850.1	AT3G16850.1	359	370	yes	yes	2	0.016672	75.387	1		1	1	1	1	16391000	0	15190000	12354000	16065000	17187000
DASLPLVPSIPACG	14	0	1395.71	AT1G65900.2;AT1G65900.1	AT1G65900.2	350	363	yes	no	2	0.0012135	137.13	1					1	21785000	0	0	0	0	14476000
DATDDKVTIESAEATK	16	1	1692.81	AT1G65930.1	AT1G65930.1	52	67	yes	yes	2	8.9813e-132	300.33		1	1				0	78928000	55725000	0	0	0
DATDDKVTIESAEATKK	17	2	1820.9	AT1G65930.1	AT1G65930.1	52	68	yes	yes	3	0.00085032	91.518	1	1	1	1	1	1	22389000	21916000	0	27714000	26929000	21396000
DATNDFEDVGHSDTAR	16	0	1748.72	AT5G53560.1	AT5G53560.1	54	69	yes	yes	2;3	9.2873e-134	303	2	2	1	2	2	2	130440000	137510000	58788000	135770000	157270000	51505000
DATPNLTVR	9	0	985.519	AT1G05260.1	AT1G05260.1	89	97	yes	yes	2	0.0039528	130.27	1	1	1	1	1	1	213280000	376080000	336040000	229110000	257540000	273540000
DAVFWAGGPYYDIPK	15	0	1697.81	AT4G33420.1;AT4G33420.2	AT4G33420.1	141	155	yes	no	2	0.0010022	110.08	1	1	1	1	1	1	25024000	22179000	30322000	39294000	36765000	41009000
DAVILASQEESDYEVIEPLPSYGR	24	0	2679.29	AT4G23500.1	AT4G23500.1	130	153	yes	yes	2;3	2.9907e-09	156	2	1		1	1	1	32135000	35115000	0	16091000	27478000	25777000
DAVQIIIK	8	0	898.549	AT1G23190.1	AT1G23190.1	69	76	yes	yes	2	0.020675	111.01		1	1	1	1		0	16562000	12341000	21711000	0	0
DAVSQLSR	8	0	874.451	AT4G23500.1	AT4G23500.1	89	96	yes	yes	2	6.2634e-12	172.14	1	1	1	1	1	1	81619000	95417000	90056000	0	63999000	82258000
DAVTFPGFVDTVYLDAPNELQFDNGLGDK	29	0	3156.49	AT5G66530.4;AT5G66530.3;AT5G66530.2;AT5G66530.1	AT5G66530.4	196	224	yes	no	3	2.0584e-15	113.5	1		1	1	1	1	9496600	0	9445100	13710000	10977000	13663000
DAVTHLTDAQEWAGGGSMVGALVGSTQR	28	0	2813.34	AT5G36790.3;AT5G36790.2;AT5G36790.1;AT5G36700.4;AT5G36700.2;AT5G36700.1;AT5G36700.3	AT5G36790.3	247	274	yes	no	3	1.2662e-44	188.38	2	2	2		1	2	73026000	47186000	67244000	0	25358000	94143000
DAVVFTGGPNWSVPTGR	17	0	1758.87	AT1G05260.1	AT1G05260.1	129	145	yes	yes	2	0.0039957	70.438			1				0	0	96904000	0	0	0
DAVVTVPAYFNDAQR	15	0	1664.82	AT5G28540.1;AT5G42020.3;AT5G42020.1;AT5G42020.2	AT5G42020.3	178	192	no	no	2	0.00033588	102.4	1	1	1	1			0	24687000	0	13492000	0	0
DAYAFLYPFGWQEVVIEGQDK	21	0	2474.18	AT3G55330.1	AT3G55330.1	89	109	yes	yes	3	0.0015692	57.826				1		1	0	0	0	9967800	0	4717800
DAYCLLNFGDSITTDHISPAGNIQK	25	0	2749.3	AT2G05710.1	AT2G05710.1	760	784	yes	yes	3	2.2584e-05	79.237	1	1		1		1	10981000	12259000	0	20058000	0	19170000
DAYCLLNFGDSITTDHISPAGSIHK	25	0	2731.29	AT4G35830.1;AT4G35830.2	AT4G35830.1	668	692	yes	no	3	4.0226e-05	75.71			1	1			0	0	20833000	24304000	0	0
DAYDSCNTDSPTAK	14	0	1543.61	AT3G20570.1	AT3G20570.1	79	92	yes	yes	2	0.0071561	77.387	1	1	1	1			11900000	11403000	13305000	10581000	0	0
DCAGTILCAAER	12	0	1335.59	AT3G45300.1	AT3G45300.1	343	354	yes	yes	2	0.01803	75.387	1		1			1	17065000	0	0	0	0	0
DCCAGFGQVIR	11	0	1281.56	AT1G55260.2;AT1G55260.1	AT1G55260.2	100	110	yes	no	2	9.5894e-05	137.9	1	1	1	1	1	1	312020000	287760000	220650000	263790000	203580000	213280000
DCDGDVTTDVTR	12	0	1352.55	AT1G17030.1	AT1G17030.1	326	337	yes	yes	2	1.2028e-53	245.5	1	1	1	1	1	1	56132000	76988000	59397000	37413000	48415000	51821000
DCQCVPSGTYGNK	13	0	1484.6	AT2G14900.1	AT2G14900.1	77	89	yes	yes	2	2.0559e-21	187.42	1	1	1	1	1	1	125780000	130060000	136170000	59768000	63011000	68593000
DCVEELGDTLEELR	14	0	1676.76	AT5G62360.1	AT5G62360.1	112	125	yes	yes	2;3	6.7916e-13	168.3	2	2	2	1	1	3	82869000	65500000	65379000	20829000	31885000	43123000
DCVEELGDTLEELRK	15	1	1804.85	AT5G62360.1	AT5G62360.1	112	126	yes	yes	3	1.2695e-20	186.56	1	1	1	1	1	1	186590000	114490000	144920000	93625000	70733000	74728000
DCVEEMNDTVDR	12	0	1481.58	AT5G62350.1	AT5G62350.1	108	119	yes	yes	2	0.00096248	107.83	1						15974000	0	0	0	0	0
DDAWLDGEFISTVQQR	16	0	1878.87	AT1G04410.1	AT1G04410.1	216	231	yes	yes	2	5.456e-37	203.51	1	1	1	1		1	28591000	26658000	34031000	23690000	0	27786000
DDDGHGTHTSSTAAGSVVEGASLLGYASGTAR	32	0	3046.39	AT5G67360.1	AT5G67360.1	208	239	yes	yes	2;3;4	1.4104e-77	214.3	4	5	4	2	2	4	1548600000	1977200000	2006600000	2259700000	2002100000	2514300000
DDDLLVLPTDAALFEDPSFK	20	0	2220.08	AT1G77490.2;AT1G77490.1	AT1G77490.2	293	312	yes	no	2	3.2344e-16	164.09	1	1	1	1	1	1	31098000	25452000	24664000	36733000	34274000	33473000
DDELLETETR	10	0	1219.56	AT2G37660.1	AT2G37660.1	264	273	yes	yes	2	0.029767	81.95			1		1		0	0	13996000	0	11209000	0
DDENVNSQPFMR	12	0	1450.61	ATCG00490.1;AT2G07732.1	ATCG00490.1	202	213	yes	no	2;3	2.6185e-130	316.72	3	3	4	3	4	5	3594500000	3841900000	3776800000	2108300000	2345000000	4093700000
DDFYITGESYAGHYIPALASR	21	0	2345.1	AT5G22960.1	AT5G22960.1	138	158	yes	yes	3	0.00012909	71.174						1	0	0	0	0	0	12362000
DDGTLASFVGFR	12	0	1283.61	AT5G18170.1	AT5G18170.1	44	55	no	no	2	1.2953e-13	172.59	1	1	1	1	1	1	14383000	16328000	17256000	18422000	15006000	19269000
DDLFNINAGIVK	12	0	1317.69	AT1G53240.1;AT3G15020.1;AT3G15020.2	AT1G53240.1	116	127	yes	no	2	0.0041658	114.39	1	1		1	1	1	142340000	115800000	0	151900000	166380000	152580000
DDNPIGATLIGR	12	0	1240.64	AT3G15730.1	AT3G15730.1	97	108	yes	yes	2	4.8133e-05	132.78	1	1	1	1		1	25812000	35753000	27220000	21949000	0	23273000
DDPNLYGEWDFEEWR	15	0	1969.81	AT3G28940.1	AT3G28940.1	114	128	yes	yes	2	7.1436e-08	184.31	1	1	1	1	1	1	23821000	14239000	16490000	15186000	13091000	12486000
DDTFTTR	7	0	854.377	AT1G63770.7;AT1G63770.4;AT1G63770.6;AT1G63770.5;AT1G63770.3;AT1G63770.2;AT1G63770.1	AT1G63770.7	202	208	yes	no	2	0.0065055	143.02	1	1	1	1	1	1	19821000	20894000	20258000	19108000	22643000	17619000
DDYVEKDR	8	1	1038.46	ATCG00490.1	ATCG00490.1	351	358	yes	yes	1;2	0.0014093	182.73	1	2	1	1	1	1	2075800000	3325200000	2168400000	1636200000	1783700000	216130000
DEAAALMESLR	11	0	1204.58	AT1G78460.1	AT1G78460.1	166	176	yes	yes	2	0.0027211	110.14						1	0	0	0	0	0	10675000
DEAEEIAGK	9	0	960.44	AT2G20420.1	AT2G20420.1	101	109	yes	yes	2	0.021517	95.741		1	1	1	1	1	0	10025000	7062400	11143000	7638900	9651700
DEALFSANAAALASR	15	0	1505.75	AT5G17920.2;AT5G17920.1	AT5G17920.2	373	387	yes	no	2	2.8096e-35	201	1	1	1	1	1	1	212170000	222900000	248030000	230770000	230130000	260090000
DEDLLVLPTDAAIFEDSSFK	20	0	2224.08	AT4G08390.3;AT4G08390.5;AT4G08390.2;AT4G08390.1	AT4G08390.3	313	332	yes	no	2	1.5797e-05	137.73	1	1	1	1			30320000	0	23199000	24200000	0	0
DEEAPVETPVVVEDESK	17	0	1870.87	AT1G62480.1	AT1G62480.1	83	99	yes	yes	2	6.4388e-28	194.86	1	1	1	1	1	1	244020000	334650000	307390000	186650000	200150000	247470000
DEEAPVETPVVVEDESKTEEVVEAK	25	1	2756.31	AT1G62480.1	AT1G62480.1	83	107	yes	yes	2;3	1.7898e-21	166.59	1	1	1	1	1	2	98246000	96431000	85979000	65613000	89051000	43708000
DEEGNCIFR	9	0	1138.47	AT5G08280.1	AT5G08280.1	327	335	yes	yes	2	0.00060868	145.04	1	1	1	1	1	1	31919000	54318000	35764000	32708000	42487000	35874000
DEEINYYPSK	10	0	1256.56	AT1G20620.5;AT1G20620.1;AT1G20620.6;AT1G20620.2;AT1G20620.4	AT1G20620.5	387	396	yes	no	1;2	1.6107e-06	150.27	2	1	2	2	2	2	287020000	265590000	233210000	347060000	363890000	299950000
DEEVNYFPSR	10	0	1254.55	AT4G35090.2;AT4G35090.3;AT4G35090.1	AT4G35090.2	387	396	no	no	2	3.9587e-11	179.51	1	1	1	1	1	1	54644000	79922000	54870000	70291000	74955000	73358000
DEFELTMALSGCR	13	0	1527.67	AT3G14415.1;AT3G14415.3;AT3G14415.2;AT3G14420.3;AT3G14420.2;AT3G14420.1;AT3G14420.4;AT3G14420.5;AT3G14420.6;AT4G18360.4;AT4G18360.1	AT3G14420.3	332	344	no	no	2	0.0023077	80.763	1					1	8447300	0	0	0	0	0
DELDIVIPTIR	11	0	1282.71	AT3G02230.1;AT3G08900.1;AT5G15650.1	AT3G02230.1	20	30	no	no	2	0.00065743	129.38	1	1	1	1	1	1	20241000	16397000	20120000	13691000	14539000	15129000
DELTLEGIK	9	0	1016.54	AT3G13920.3;AT3G13920.4;AT1G54270.2;AT3G13920.1;AT1G54270.1;AT1G72730.1;AT3G13920.2;AT3G13920.5;AT3G19760.1	AT3G13920.3	235	243	yes	no	2	0.04924	82.279	1	1			1	1	11328000	21870000	0	0	15042000	7509100
DENPFSHGQGLYINQIPFK	19	0	2203.07	AT3G16530.1	AT3G16530.1	58	76	yes	yes	3	6.1278e-07	123.19	1	1	1	1	1	1	31717000	27804000	32203000	59740000	46837000	47420000
DETKPEETPIASEFEQK	17	1	1976.92	AT1G76180.2;AT1G76180.1	AT1G76180.2	39	55	yes	no	3	0.039144	42.633		1	1				0	0	26960000	0	0	0
DETPFSHGQGLYINPIQFK	19	0	2190.07	AT3G15356.1	AT3G15356.1	58	76	yes	yes	2;3	1.6261e-129	350.18	3	3	3	4	3	3	8034800000	7139400000	8017900000	8816100000	8600000000	9709100000
DETYPLYR	8	0	1055.49	AT2G30010.1;AT2G30010.2	AT2G30010.1	66	73	yes	no	2	0.023774	105.2		1		1	1	1	0	17746000	0	15503000	0	14742000
DEVEDLEK	8	0	975.44	AT3G03780.3;AT3G03780.2;AT3G03780.1;AT5G17920.2;AT5G17920.1;AT5G20980.2;AT5G20980.1	AT5G17920.2	589	596	no	no	1;2	0.010881	162.25	2	1	2	2	2	2	51312000	53351000	47843000	47840000	56898000	46653000
DEYDPSTGCLK	11	0	1283.53	AT1G28600.1	AT1G28600.1	239	249	yes	yes	2	0.034252	76.465		1	1	1	1	1	0	22500000	14634000	12068000	17251000	14704000
DEYVFWDAFHPGEAANVVIGSR	22	0	2478.16	AT4G18970.1;AT4G18970.2	AT4G18970.1	319	340	yes	no	2;3	8.4692e-18	166.04	2	1	2	2	2	2	115780000	58720000	99854000	79904000	91324000	85134000
DEYVFWDAFHPSAAANTAIAK	21	0	2323.09	AT1G29660.1	AT1G29660.1	322	342	yes	yes	2;3	8.2825e-69	285.43	2	1	1	2	2	2	1003200000	526940000	736020000	1184100000	1080300000	1253400000
DFADYAEFCYK	11	0	1427.57	AT3G18080.1	AT3G18080.1	181	191	yes	yes	2	8.5905e-05	138.98	1	1	1				26374000	0	38057000	0	0	0
DFAQAIDVVR	10	0	1132.59	AT3G19170.1;AT3G19170.2	AT3G19170.1	1040	1049	yes	no	2	0.0024932	126.82		1	1		1	1	0	49541000	43176000	0	52683000	61367000
DFDIEGCPVPGPADCPANSK	20	0	2144.91	AT4G37800.1	AT4G37800.1	225	244	yes	yes	2;3	3.4077e-83	241.76	2	2	2	2	2	2	2849200000	3465200000	2891200000	2193500000	2096300000	2046600000
DFDIEGCPVPGPTFCPSNPHNWWEGYAYQSLNAVEAR	37	0	4279.88	AT5G65730.1	AT5G65730.1	226	262	yes	yes	3;4	1.3309e-63	196.75	2		2	2	2	2	126030000	0	91658000	86492000	77379000	74128000
DFDPLLK	7	0	846.449	AT1G55480.1	AT1G55480.1	305	311	yes	yes	2	0.043774	100.74		1	1	1			0	36511000	25026000	53496000	0	0
DFEEAGHLAPTGLFLGGEK	19	0	1986.97	AT4G29350.1	AT4G29350.1	53	71	yes	yes	2;3	3.0466e-112	268.56	2	2	2	2	2	2	275870000	212250000	252050000	167230000	148880000	169380000
DFEEPGFLAPTGLFLGGEK	19	0	2022.99	AT2G19760.1	AT2G19760.1	53	71	yes	yes	2	3.9005e-29	193.06	1	1	1	1	1	1	161390000	143320000	138670000	92630000	83665000	90045000
DFEQIGEFLSR	11	0	1339.64	AT4G13930.1	AT4G13930.1	404	414	yes	yes	2	7.0367e-12	182.71	1	1	1	1	1	1	32141000	30645000	38584000	47923000	37547000	42017000
DFGFSGILGGK	11	0	1096.56	AT4G19410.1;AT4G19410.2;AT5G45280.2;AT5G45280.1	AT4G19410.1	93	103	no	no	1;2	4.5575e-05	150.35	4	4	3	4	3	4	5784300000	4543100000	590180000	4497400000	651470000	3958800000
DFGYLADICFK	11	0	1347.62	AT1G61820.1;AT1G61820.3	AT1G61820.1	174	184	yes	no	2	0.024785	97.565	1	1	1	1	1	1	20199000	13956000	20594000	19628000	24935000	23705000
DFHEYAISWNHLR	13	0	1686.79	AT4G37800.1	AT4G37800.1	150	162	yes	yes	2;3	0	328.26	2	2	2	2	2	2	895500000	799480000	873120000	748850000	792900000	848900000
DFIEILK	7	0	876.496	AT1G78380.1	AT1G78380.1	127	133	yes	yes	2	0.026013	113.1	1	1	1	1	1	1	106880000	110020000	107530000	93937000	100860000	102740000
DFLAIDDFDTATIK	14	0	1583.77	AT1G75330.1	AT1G75330.1	74	87	yes	yes	2	3.0554e-05	156.51		1	1	1	2	1	0	29937000	38869000	0	0	68968000
DFLDTIYAEAVQYNR	15	0	1816.86	AT5G22860.1;AT5G22860.3;AT5G22860.2;AT5G22860.4;AT5G22860.7;AT5G22860.6;AT5G22860.5;AT5G22860.8	AT5G22860.1	286	300	yes	no	2	2.3817e-107	291.24	1		1	1	1	1	44160000	0	41573000	46067000	47810000	44171000
DFMIQGGDFEK	11	0	1285.56	AT5G13120.2;AT5G13120.1	AT5G13120.2	144	154	yes	no	2	0.010261	85.355						1	0	0	0	0	0	20134000
DFPALAILGNGK	12	0	1214.67	AT5G67360.1	AT5G67360.1	340	351	yes	yes	2	4.768e-09	158.76	1	1	1	1	1	1	54140000	70326000	57412000	74261000	76481000	62607000
DFPELGLTQK	10	0	1146.59	AT5G44390.1	AT5G44390.1	333	342	yes	yes	1;2	0.0013587	131.22	1	1	1	1	2	1	46685000	60262000	46335000	46133000	68017000	45245000
DFSGQTLIR	9	0	1035.53	AT2G44920.2;AT2G44920.1	AT2G44920.2	102	110	yes	no	2	0.0068703	122.74	1	1	1	1	1	1	35703000	60255000	52009000	51257000	57280000	76322000
DFSLQVGNQESGCLLPSLPSDAIFDK	26	0	2836.36	AT1G61900.2;AT1G61900.1	AT1G61900.2	338	363	yes	no	3	0.0027521	42.347	1		1				12629000	0	14283000	0	0	0
DFTGPSELADCLK	13	0	1451.66	AT3G47520.1	AT3G47520.1	137	149	yes	yes	2	0.00010262	114.83				1		1	0	0	0	13996000	0	23640000
DFTLDPVNFPEDK	13	0	1535.71	AT5G11720.1	AT5G11720.1	356	368	yes	yes	2	1.298e-43	230.93	1	1	1	1	1	1	264910000	298480000	292980000	330340000	312220000	315340000
DFTLNPVAYPR	11	0	1291.66	AT1G68560.1	AT1G68560.1	337	347	yes	yes	2	4.579e-27	214.29	1	1	1	1	1	1	558010000	803350000	683800000	344690000	366920000	379580000
DFVCVENAK	9	0	1080.49	AT5G66530.4;AT5G66530.3;AT5G66530.2;AT5G66530.1	AT5G66530.4	250	258	yes	no	2	0.0072893	105.25	1	1	1			1	0	64321000	81409000	0	0	0
DFVSAMESSSTIQSEIAK	18	0	1928.9	AT4G37930.1	AT4G37930.1	474	491	yes	yes	2	2.3142e-45	220.31	1	1	2	1	1	2	31230000	22783000	32447000	47157000	32469000	0
DFVVVADFIK	10	0	1151.62	AT4G32520.2;AT4G32520.1	AT4G32520.2	465	474	yes	no	2	0.038364	92.838	1	1	1	1	1	1	7567700	5435000	8167100	8158500	7652100	0
DFYDVSLVDGYNVK	14	0	1632.77	AT1G75040.1	AT1G75040.1	121	134	yes	yes	2	1.5391e-52	238.51	3	4	3	3	4	3	2832400000	2655800000	2779200000	4098100000	4117300000	4178300000
DGAGCGACFQVR	12	0	1296.53	AT3G45970.2;AT3G45970.1;AT3G45960.1;AT3G45960.2	AT3G45970.2	41	52	yes	no	2	2.1895e-80	270.57	2	2	2	2	2	1	1487200000	1808800000	1693600000	1481800000	1553900000	1509600000
DGAGFGPHDAQLDLSR	16	0	1654.77	AT2G35830.1;AT2G35830.2	AT2G35830.1	32	47	yes	no	2;3	0.041633	52.555		1	1	1	1	1	0	16369000	19239000	13862000	13076000	14556000
DGAQWLVDNTDIK	13	0	1473.71	AT4G35220.1	AT4G35220.1	193	205	yes	yes	2	4.0027e-10	144.17	1	1	1	1			45682000	0	58326000	0	0	0
DGASGDYPGCTDLAYEK	17	0	1817.74	AT1G66970.3;AT1G66970.1;AT1G66970.2	AT1G66970.3	178	194	yes	no	2	1.4943e-19	178.15	1	1	1	1	1	1	50991000	63267000	48080000	68927000	63105000	48235000
DGASGDYPGCTDLAYK	16	0	1688.7	AT4G26690.1	AT4G26690.1	366	381	yes	yes	2	1.3038e-08	158.42	1	1	1	1	1	1	40737000	57747000	32702000	35095000	33166000	40129000
DGCALEGLCVCSEDAHCAPTK	21	0	2348.95	AT2G46760.1	AT2G46760.1	553	573	yes	yes	3	0.0031324	52.541	1	1	1	1	1		39282000	84970000	63899000	60438000	52156000	0
DGDGCITTK	9	0	965.412	AT5G37780.1;AT1G66410.1;AT5G21274.1;AT3G56800.1;AT3G43810.1;AT2G41110.1;AT2G27030.1;AT2G27030.3;AT3G43810.2	AT5G37780.1	23	31	no	no	2	0.0076501	125.47	1	2	1	1	1	2	282160000	400180000	330760000	218950000	227390000	216480000
DGEFTGLLK	9	0	978.502	AT5G23820.1	AT5G23820.1	82	90	yes	yes	2	1.5514e-05	161.02	2	1	1	1	1	1	261830000	315650000	256450000	135700000	158290000	146500000
DGEIYVVTDPGNDDPVNPR	19	0	2070.95	AT5G63180.1	AT5G63180.1	117	135	yes	yes	2	4.991e-14	210.41	1	1	1	1	1	1	65237000	79846000	88404000	73767000	43255000	58403000
DGELAPQYR	9	0	1047.5	AT5G14780.3;AT5G14780.2;AT5G14780.1	AT5G14780.3	350	358	yes	no	2	0.0032504	132.08	1	1	1	1	1	1	19096000	31515000	21436000	45131000	38871000	36631000
DGFFILK	7	0	838.459	AT2G15620.1	AT2G15620.1	54	60	yes	yes	2	0.0562	94.163	1	1	1	1	1	1	13671000	22895000	17959000	9090800	9825000	9961700
DGFGSISLPLTNLR	14	0	1488.79	AT1G13900.1	AT1G13900.1	83	96	yes	yes	2	4.3079e-15	168.69	1	1	1	1	1	1	100240000	82052000	85168000	89935000	78353000	73952000
DGFLQTNPSTSPEHMFTAPIGK	22	0	2374.13	AT4G34260.1	AT4G34260.1	551	572	yes	yes	2;3	1.4679e-07	134.14	2	1	3	3	3	3	160210000	181720000	279230000	166510000	170320000	211780000
DGGLDVIDTYVFWNGHEPSPGTYNFEGR	28	0	3141.41	AT1G45130.1	AT1G45130.1	71	98	yes	yes	3	0.010822	30.337				1	1		0	0	0	7402500	7507700	0
DGGLDVIETYVFWSGHEPEK	20	0	2277.06	AT2G28470.4;AT2G28470.2;AT2G28470.3;AT2G28470.1;AT2G28470.5	AT2G28470.4	66	85	yes	no	2;3	3.1978e-180	306.14	2	2	2	2	2	2	597520000	347470000	546810000	977590000	1095500000	806220000
DGGSDYLGK	9	0	910.403	AT2G36530.1;AT2G36530.2	AT2G36530.1	53	61	yes	no	2	0.0079122	118.74		1	1		1	1	0	73248000	45916000	0	24318000	23744000
DGGSEYAGEGVVIGFIDTGIDPTHPSFSDK	30	0	3066.41	AT1G30600.1	AT1G30600.1	156	185	yes	yes	3	5.4232e-17	119.35	1	1	1	1	1	1	25849000	16909000	28322000	33655000	29569000	29922000
DGIDWLEYK	9	0	1137.53	AT5G66190.1;AT5G66190.2	AT5G66190.1	338	346	yes	no	2	4.3828e-07	176.44	1	1	1	1	1	1	67786000	86677000	65749000	101580000	74812000	81050000
DGIESLFK	8	0	907.465	AT4G20840.1	AT4G20840.1	392	399	yes	yes	1;2	0.012196	121.99	2	2	2	2	2	2	327370000	329160000	306060000	423120000	442990000	407450000
DGIQFPDVVHALKPNPK	17	1	1874.01	AT1G20620.5;AT1G20620.1;AT1G20620.6;AT1G20620.2;AT1G20620.4;AT1G20620.7	AT1G20620.5	147	163	yes	no	2;3;4	6.4366e-19	186.13	3	3	3	3	3	3	278350000	243560000	255680000	317200000	350140000	398560000
DGKPLLDIATGK	12	1	1226.69	AT5G67360.1	AT5G67360.1	581	592	yes	yes	1;2	1.6107e-09	175.54	2	2	2	2	1	2	1217100000	1107600000	1006300000	1662700000	82950000	1375200000
DGKPVLIELIDAK	13	1	1409.81	AT4G16155.1;AT3G16950.1;AT3G16950.2	AT4G16155.1	324	336	yes	no	2	4.428e-07	148.62	1	1	1	1	1	1	37447000	31464000	44640000	31377000	36063000	43387000
DGLADAVVWNPWDK	14	0	1584.76	AT5G57330.1	AT5G57330.1	238	251	yes	yes	2	1.1705e-12	164.04	1	1	1	1	1	1	14875000	13562000	12857000	21350000	17043000	16671000
DGLILQVCAPK	11	0	1212.65	AT5G19240.1	AT5G19240.1	106	116	yes	yes	2	0.0021779	114.84	1	1	1	2	1	1	178250000	155560000	202890000	261000000	288120000	282840000
DGLSSSASSVTGK	13	0	1194.57	AT4G37530.1;AT4G37530.2	AT4G37530.1	153	165	yes	no	2	2.4375e-05	151.15	1	1	1	1	1	1	342690000	432790000	351470000	463930000	463060000	392910000
DGLVANQNSANNLPSPFEPLDAIIAK	26	0	2707.38	AT5G19890.1	AT5G19890.1	150	175	yes	yes	2;3	2.5952e-05	67.218	1	1	1	2	2	2	21473000	22417000	21172000	117650000	115120000	113470000
DGLVEQISMTR	11	0	1247.62	AT3G52840.1;AT3G52840.2	AT3G52840.1	454	464	yes	no	2	2.53e-12	185.61	2	2	2	2	2	2	449990000	346930000	433380000	418550000	463050000	625360000
DGMLPNGDFELGPK	14	0	1488.69	AT5G25460.1	AT5G25460.1	28	41	yes	yes	2	0.00024211	118.28	2	1	2	2	1	1	73228000	45731000	42592000	26401000	20129000	27555000
DGNLQIIDQLIQADDR	16	0	1825.92	AT3G14920.1	AT3G14920.1	451	466	yes	yes	2;3	4.3146e-244	358.67	2	3	3	3	2	3	355270000	342510000	336420000	473190000	465290000	414200000
DGPALEK	7	0	728.37	AT2G14900.1	AT2G14900.1	42	48	yes	yes	2	0.052868	95.352	1	1	1	1	1	1	660700000	871870000	562810000	701970000	818680000	652530000
DGPTVWEIGIPDR	13	0	1453.72	AT4G24430.1;AT4G24430.2	AT4G24430.1	442	454	yes	no	2	1.826e-05	148.28	1	1	1	1	1	2	27572000	19922000	27019000	28442000	30175000	0
DGSGCGACFQVR	12	0	1312.53	AT4G38400.1	AT4G38400.1	69	80	yes	yes	2	1.7749e-08	138.4	1	1	1	1	1	1	27180000	0	0	29398000	25122000	33155000
DGSGNSQLYQVYLCVDR	17	0	1972.89	AT2G02990.1	AT2G02990.1	189	205	yes	yes	2	2.5712e-62	230.06	1		1	1			36798000	0	0	36888000	0	0
DGSIMPACVPR	11	0	1201.56	AT3G06035.1	AT3G06035.1	105	115	yes	yes	2	0.066994	67.563						1	0	0	0	0	0	53241000
DGSQDTLER	9	0	1019.45	AT5G63980.1	AT5G63980.1	80	88	yes	yes	2	8.2068e-06	136.27	1	1	1	1	1	1	0	24040000	0	0	21185000	17514000
DGSSLVR	7	0	732.377	AT1G29050.1	AT1G29050.1	238	244	yes	no	1;2	0.0067614	143.02	2	2	2	2	2	2	45113000	37504000	27231000	47420000	56926000	39694000
DGSTLGSGNYIVTVGLGTPK	20	0	1934.99	AT5G10770.1	AT5G10770.1	123	142	yes	yes	2	4.506e-99	254.45	1	1	1	1	1	1	64015000	59809000	82540000	80549000	87968000	100210000
DGTDDPLLNVVQSESVDLSGLGCGK	25	0	2574.21	AT3G48690.1	AT3G48690.1	232	256	yes	yes	2	2.3948e-12	192.96	1			1		1	13054000	0	0	16856000	0	7172900
DGTTQGPLINDAAVQK	16	0	1626.82	AT1G79440.1	AT1G79440.1	366	381	yes	yes	2	0.0014561	117.79		1					0	23622000	0	0	0	0
DGTYPSNCDASKPFDSSTISDLLTSMK	27	1	2936.31	AT2G02990.1	AT2G02990.1	73	99	yes	yes	3	5.551e-15	125.83	1	2	2	1	2	1	61759000	71982000	85652000	18867000	27241000	20871000
DGVAIGAFAAMER	13	0	1306.63	AT5G67360.1	AT5G67360.1	292	304	yes	yes	2	0.00095113	98.353	2	2	2	2	2	2	79404000	95892000	83640000	101960000	116940000	165280000
DGVILGADTR	10	0	1015.53	AT3G27430.1;AT3G27430.2;AT5G40580.2;AT5G40580.1	AT3G27430.1	49	58	yes	no	2	0.019101	91.087	1	1	1	1	1		17729000	33971000	28703000	22790000	30828000	0
DGVLICFHDCILDETTNVASHK	22	0	2543.18	AT1G74210.1	AT1G74210.1	84	105	yes	yes	3	2.3658e-56	178.41	1	1	1	1	1	1	34373000	20845000	54570000	76824000	76423000	45429000
DGVTCDER	8	0	950.376	AT4G18970.1;AT4G18970.2	AT4G18970.1	233	240	yes	no	2	1.7075e-07	189.53	1	1	1	1	1	1	278670000	327310000	304930000	265450000	209610000	180850000
DGWGLATDGK	10	0	1018.47	AT4G25720.4;AT4G25720.2;AT4G25720.3;AT4G25720.1;AT4G25720.5	AT4G25720.4	176	185	yes	no	2	0.01672	93.649	1	1	1	1		1	0	52295000	36254000	44500000	0	48032000
DGYINLDEFSTLCR	14	0	1701.77	AT1G18210.2;AT1G18210.1	AT1G18210.2	72	85	yes	no	2	0.00034075	142.07	1	1	1		1	1	16120000	16221000	15225000	0	16499000	17267000
DGYPSDPELIFLTDGASK	18	0	1923.91	AT1G23310.1;AT1G23310.2;AT1G70580.4;AT1G70580.3;AT1G70580.2;AT1G70580.1	AT1G23310.1	124	141	yes	no	2;3	1.3529e-05	177.21	1	2	2	1	2	2	180700000	204350000	221300000	193460000	212520000	204370000
DGYTQEISGSDSVR	14	0	1512.67	AT5G18860.2;AT5G18860.1	AT5G18860.2	433	446	yes	no	2	0.0026106	88.441		1	1				0	32968000	25319000	0	0	0
DHANYYSPR	9	0	1121.49	AT1G68560.1	AT1G68560.1	620	628	yes	yes	2;3	5.6529e-30	228.31	2	2	2	2	2	2	336760000	411460000	319460000	177690000	165150000	160140000
DHDQNPLPGTK	11	0	1220.58	AT1G13900.1	AT1G13900.1	117	127	yes	yes	2	2.4813e-20	206.49	1	1	1	1	1	1	15763000	17486000	16956000	10209000	13307000	11501000
DHDTCISK	8	0	974.413	AT2G14740.2;AT2G14740.1;AT2G14720.2;AT2G14720.1	AT2G14740.2	554	561	yes	no	2	0.031658	99.139	1	1	1	1	1		3986800	5141700	3168800	2136500	2116600	0
DHEDNLSLAGDGFDTVIK	18	0	1944.91	AT4G37530.1;AT4G37530.2	AT4G37530.1	91	108	yes	no	2;3	1.2441e-208	390.61	2	2	2	2	2	2	362080000	300570000	396300000	384770000	373640000	372240000
DHEENLSLAGDGFDTVIK	18	0	1958.92	AT4G37520.1;AT4G37520.2	AT4G37520.1	91	108	yes	no	2;3	5.754e-129	281.07	2	2	2	2	2	2	98325000	100510000	98662000	84671000	96359000	93648000
DHGAVTPVK	9	0	922.487	AT4G39090.1	AT4G39090.1	143	151	yes	yes	2	3.7625e-07	177.97	1	1	1	1	1	1	20054000	28718000	20709000	29305000	38562000	28631000
DHQMLALEAAK	11	0	1225.61	AT3G19620.1	AT3G19620.1	384	394	yes	yes	1;2;3	4.2781e-73	275.57	4	4	5	5	4	5	816060000	649170000	778660000	769180000	767590000	1069600000
DHSFHNEFEISEMLR	15	0	1889.84	AT1G65960.2;AT1G65960.4;AT1G65960.3;AT1G65960.1	AT1G65960.2	381	395	yes	no	3	1.3919e-08	128.9	1	1		1	1	1	10792000	34783000	0	21752000	20421000	21165000
DHSSLGTAR	9	0	942.452	AT5G11720.1	AT5G11720.1	615	623	yes	yes	2	4.6926e-80	280.23	1	1	1	1	1	1	325270000	309290000	321200000	316690000	348220000	452950000
DHVHALSK	8	0	905.472	AT1G01090.1	AT1G01090.1	143	150	yes	yes	2	0.013269	117.72	1		1	1	1	1	5495900	0	6465600	4848900	5279700	4790000
DHVSPAAK	8	0	823.419	AT4G37000.1	AT4G37000.1	241	248	yes	yes	2	0.00091497	136.11	1	1		1	1	1	4216300	3167600	0	0	0	3190200
DIATAAESGCDFSTR	15	0	1599.68	AT4G24040.1	AT4G24040.1	370	384	yes	yes	2	7.6203e-26	193.73	1	1		1	1		30233000	46155000	0	28078000	46049000	0
DIAVQGNVDPGVLFGSK	17	0	1714.89	AT2G40490.1	AT2G40490.1	330	346	yes	yes	2	8.3346e-06	144.27	1	1	1	1	1	1	41218000	29655000	36228000	46350000	44625000	40589000
DIDIGSNPSDETNVDEAK	18	0	1917.84	AT1G26420.1	AT1G26420.1	472	489	yes	yes	2	7.5179e-10	203.87		1	1	1	1	1	0	71541000	43384000	43359000	51686000	56665000
DIDIGSNPSGETDVDEAK	18	0	1860.82	AT1G26380.1	AT1G26380.1	472	489	yes	yes	2	1.2274e-05	169.79	1	1		1			23645000	18713000	0	27661000	0	0
DIDVGSNPSGETNVDEAK	18	0	1845.82	AT1G26390.1	AT1G26390.1	474	491	yes	yes	2	1.1127e-13	150.49	2	1	1	1	1	1	23401000	51750000	26765000	36519000	26222000	0
DIDYSSGDVCGVLVQYPGTEGEVLDYAEFVK	31	0	3423.57	AT4G33010.1;AT4G33010.2	AT4G33010.1	271	301	yes	no	3	3.611e-43	176.85		1	1	1	1	1	0	80269000	118660000	124540000	144570000	136550000
DIEDVLILSGDHLYR	15	0	1756.9	AT5G19220.1	AT5G19220.1	208	222	yes	yes	2;3	1.1078e-47	198.81	2			1	2	1	5288400	0	0	11754000	22726000	9670600
DIEEVGYDR	9	0	1094.49	AT1G09310.1;AT1G56580.1	AT1G09310.1	43	51	yes	no	1;2	1.0095e-05	157.91	2	2	2	2	2	2	57553000	314830000	238250000	139140000	156390000	137170000
DIEYLSIGVDNLPLFAGR	18	0	1991.04	AT4G15210.4;AT4G15210.3;AT4G15210.1;AT4G15210.2	AT4G15210.4	81	98	yes	no	2	5.9749e-14	218.06	1		1	1	1	1	14017000	0	12933000	12563000	18729000	10022000
DIFQEVYEASWK	12	0	1513.71	AT1G65930.1	AT1G65930.1	225	236	yes	yes	2	7.552e-17	176.48	1	1	1	1	1	1	21289000	10790000	13089000	19337000	13514000	16406000
DIGASLADPSKPLLLSVR	18	1	1851.05	AT4G15530.7;AT4G15530.3;AT4G15530.2;AT4G15530.4;AT4G15530.1;AT4G15530.6;AT4G15530.5	AT4G15530.7	61	78	yes	no	2;3	4.9537e-07	102.87		1	1	2	1	1	0	8264600	11641000	41972000	12536000	0
DIGSLGQLSEK	11	0	1145.59	AT5G13690.1	AT5G13690.1	652	662	yes	yes	2	3.7821e-07	135.72	1	1	1	1	1	2	0	0	0	0	177000000	0
DIHDEPR	7	0	880.404	AT1G23205.1	AT1G23205.1	168	174	yes	yes	2	0.016962	120.49	1	1	1	1	1	1	12514000	16757000	15674000	13985000	15382000	12904000
DIIAVSQVPYK	11	0	1231.68	AT3G43670.1	AT3G43670.1	139	149	yes	yes	2	0.01298	101.11		1	1		1	1	0	36537000	38926000	0	32474000	30413000
DIIIATGSVPFVPK	14	0	1455.83	AT4G16155.1;AT3G16950.1;AT3G16950.2	AT4G16155.1	216	229	yes	no	2	2.5961e-05	135.99	1	1	1	1	1	1	48305000	40821000	49627000	50305000	59674000	53881000
DIINVKPLIDR	11	1	1294.76	AT4G21280.1;AT4G21280.2	AT4G21280.1	132	142	yes	no	2;3	0.0013132	101.11	1	2	1	2		1	41207000	36018000	24822000	74285000	0	27751000
DIIPILEK	8	0	939.564	AT2G28000.1	AT2G28000.1	276	283	yes	yes	2	0.033401	97.798	1	1	1	1	1	1	48379000	46405000	40839000	42708000	29698000	0
DIIPVEALK	9	0	996.586	AT4G34180.1;AT1G44542.1	AT4G34180.1	215	223	yes	no	1;2	9.3065e-05	162.97	2	2	2	2	2	2	752140000	872120000	750210000	943260000	1060900000	1002200000
DILDSAIEDIK	11	0	1230.63	AT4G26690.1	AT4G26690.1	565	575	yes	yes	2	0.029897	78.098		1	1				0	26889000	38134000	0	0	0
DILDSAIEDIKK	12	1	1358.73	AT4G26690.1	AT4G26690.1	565	576	yes	yes	2;3	3.4876e-12	169.37	2	2	2	2	1	2	93790000	57277000	82694000	133900000	70567000	143120000
DILDTAIEDIKK	12	1	1372.74	AT5G55480.1	AT5G55480.1	572	583	yes	yes	2;3	0.00012748	146.11	1	2	2	1		1	23261000	26081000	37230000	9728800	0	0
DILGSVGAETEDSQIELLLK	20	0	2129.11	AT2G27720.1	AT2G27720.1	25	44	yes	yes	2	2.3519e-23	180.97	1						9247500	0	0	0	0	0
DIPNLTFEEFK	11	0	1351.67	AT3G19170.1;AT3G19170.2	AT3G19170.1	298	308	yes	no	2	4.8055e-05	143.03	1	1	1	1	1	1	52933000	53990000	47928000	59369000	64783000	52782000
DITFENWAGPAK	12	0	1347.65	AT3G49220.1;AT3G49220.3	AT3G49220.1	377	388	yes	no	2	0.0091676	81.95	1		1	1	1	1	12858000	0	0	13347000	15815000	10625000
DITFQNTAGPEK	12	0	1319.64	AT4G33220.1;AT4G33220.2;AT3G43270.1	AT4G33220.1	304	315	no	no	2	7.7059e-39	223.08	1	1	1		1	1	0	385300000	0	0	0	332180000
DITFQNTAGPSK	12	0	1277.63	AT3G14310.1;AT1G53830.1	AT3G14310.1	373	384	yes	no	2	9.502e-06	163.64	1	1	1		1	2	131620000	174680000	132330000	0	0	0
DITFVNSAGPNSEQAVALR	19	0	1988	AT3G59010.1	AT3G59010.1	319	337	yes	yes	2	5.3815e-96	264.72		1	1		1	1	0	48511000	46664000	0	51835000	48773000
DITGGSYIQSYYAK	14	0	1564.74	AT5G45280.2;AT5G45280.1	AT5G45280.2	208	221	yes	no	2	7.7863e-105	283.52	1	1	1	1	1	1	673040000	1219500000	1099000000	755900000	822290000	984810000
DITGGSYIQSYYSK	14	0	1580.74	AT4G19410.1;AT4G19410.2	AT4G19410.1	208	221	yes	no	2	3.3597e-42	268.73	2	1	2	1	1	1	1538900000	1206700000	1377300000	571520000	526460000	638170000
DITGNPR	7	0	771.388	AT3G12580.1;AT5G02500.1;AT5G02500.2	AT3G12580.1	258	264	no	no	2	0.035228	106.29				1	1		0	0	0	18426000	21234000	0
DITLSSVHHDGTVQTISGSSTILR	24	0	2523.29	AT1G63770.7;AT1G63770.4;AT1G63770.6;AT1G63770.5;AT1G63770.3;AT1G63770.2;AT1G63770.1	AT1G63770.7	500	523	yes	no	3;4	6.7199e-38	189.64	1		1	1	2	1	27213000	0	45974000	50163000	96253000	56268000
DITPDDKQELDEALQR	16	1	1884.91	AT1G53310.3;AT1G53310.2;AT1G53310.1;AT2G42600.3;AT2G42600.2;AT2G42600.1	AT2G42600.3	199	214	no	no	2;3	3.3514e-08	125.89	1	1	1	1	2	2	44292000	32075000	35627000	33628000	78099000	57294000
DIVDAPPVPALSFSPHR	17	0	1816.95	AT2G47390.1	AT2G47390.1	119	135	yes	yes	2;3	2.086e-08	151.78	2	1	1	2	2	2	41461000	27522000	28942000	45749000	45337000	70440000
DIVPLYETR	9	0	1104.58	AT4G12880.2;AT4G12880.1	AT4G12880.2	58	66	yes	no	2	0.013203	121.67	1	1	1	1	1	1	653450000	497930000	679410000	235050000	247380000	251040000
DKDDPQLGIK	10	1	1127.58	AT1G55260.2;AT1G55260.1	AT1G55260.2	122	131	yes	no	2	8.4922e-119	313.88	1	1	1	1	1	1	218480000	207990000	205830000	250920000	234810000	182190000
DKDLAHIEEHMK	12	1	1464.7	AT1G11860.1;AT1G11860.2;AT1G11860.3	AT1G11860.1	153	164	yes	no	3;4	4.46e-13	164.88	3	3	2	3	3	3	171500000	161810000	94202000	155660000	158470000	194660000
DKGVAVAVASAEDIDAANNER	21	1	2114.02	AT3G19170.1;AT3G19170.2	AT3G19170.1	1050	1070	yes	no	3	0.020752	27.086			1	1		1	0	0	18181000	21173000	0	28047000
DKHILNLGHGIK	12	1	1343.77	AT2G40490.1	AT2G40490.1	363	374	yes	yes	2;3	2.8481e-06	125.23	1	1	1	2	2	2	12338000	24745000	0	22763000	36762000	17899000
DKLSFPSQTATAYNK	15	1	1669.83	AT5G10770.1	AT5G10770.1	267	281	yes	yes	2;3	7.8122e-19	178.32		2	1	1	1	1	0	39252000	24194000	0	37768000	22301000
DKLVVSTSCSLLHTAVDLINETK	23	1	2542.33	AT3G03780.3;AT3G03780.2;AT3G03780.1;AT5G17920.2;AT5G17920.1	AT5G17920.2	320	342	no	no	3	4.1416e-12	145.13				1	1		0	0	0	11570000	8677100	0
DKTDYFWYFTDITIGSDESFLK	22	1	2690.24	AT3G52840.1;AT3G52840.2	AT3G52840.1	465	486	yes	no	3	0.00079155	72.399				1	1	1	0	0	0	11930000	10091000	5859100
DKTDYFWYLTDITISPDEK	19	1	2349.11	AT4G26140.9;AT4G26140.1;AT4G26140.7;AT4G26140.3;AT4G26140.2;AT4G26140.6;AT4G26140.8;AT4G26140.5;AT4G26140.4	AT4G26140.9	467	485	yes	no	2;3	2.4583e-93	312.49	2	2	2	2	2	2	77489000	44508000	72005000	105610000	131860000	106830000
DKTDYLWYTSSFK	13	1	1652.77	AT5G63800.1	AT5G63800.1	472	484	yes	yes	2;3	8.6667e-149	328.26	2	3	2	2	2	2	181580000	186010000	193050000	328510000	345380000	312830000
DKVEFGYSK	9	1	1071.52	AT4G23600.1;AT4G23600.3;AT4G23600.2	AT4G23600.1	314	322	yes	no	2	0.025781	137.28				1	1	1	0	0	0	32397000	30064000	0
DLAELIAAGR	10	0	1027.57	AT2G27720.1;AT2G27720.4;AT2G27710.4;AT2G27710.3;AT2G27710.2;AT2G27710.1;AT2G27720.3;AT2G27720.2	AT2G27720.1	50	59	yes	no	2	0.0025998	126.41	1	1	1		1	1	17305000	13857000	19553000	0	11780000	11914000
DLALIIHGSK	10	0	1065.62	AT1G65930.1	AT1G65930.1	375	384	yes	yes	2	0.0055113	129.85	1	1	1	1	1	1	70404000	52999000	50784000	104460000	84265000	58203000
DLALVSFQSVSK	12	0	1292.7	AT1G17290.1	AT1G17290.1	349	360	yes	yes	2	0.00054477	113.67	1	1	1	1	1	1	0	0	12722000	15751000	0	18817000
DLATAFLNVLGNEK	14	0	1503.79	AT1G09340.1;AT1G09340.2	AT1G09340.1	252	265	yes	no	2	9.7721e-105	330.06	1	1	1	1	1	1	533220000	432110000	483800000	670560000	609260000	579930000
DLATVDSILLR	11	0	1214.69	AT5G60600.5;AT5G60600.4;AT5G60600.3;AT5G60600.2;AT5G60600.1	AT5G60600.5	445	455	yes	no	2	0.0009993	145.17	1	1	1	1	1	1	10993000	10638000	9962000	8772100	9452100	10076000
DLAVEGNEIIR	11	0	1227.65	ATCG00490.1	ATCG00490.1	436	446	yes	yes	1;2	5.3249e-129	318.89	4	3	3	3	3	3	48750000000	48723000000	39549000000	57815000000	54688000000	41339000000
DLDAEQWR	8	0	1031.47	AT2G06850.1;AT2G06850.2	AT2G06850.1	255	262	yes	no	2	0.0017126	158.36		1		1	1	1	0	194540000	0	46892000	53268000	60814000
DLDAIFINHNR	11	0	1326.67	AT4G13340.1;AT4G18670.1	AT4G13340.1	210	220	no	no	2;3	2.04e-20	233	2	2	2	2	2	2	150890000	173290000	132080000	119140000	104190000	121090000
DLDIGSSVK	9	0	932.481	AT1G30720.1	AT1G30720.1	475	483	yes	yes	1;2	0.0027107	138.98	2	2	1	2	2	2	272280000	230800000	152210000	323190000	329870000	261750000
DLDILFTAETHNFPCAVAPYPGAETGAGGR	30	0	3146.48	AT1G74260.1	AT1G74260.1	386	415	yes	yes	3	0.01223	29.377						1	0	0	0	0	0	6213700
DLDLGQNK	8	0	901.451	AT5G44390.1	AT5G44390.1	486	493	yes	yes	2	0.0013953	162.51	1	1	1	1	1	1	0	81890000	67801000	83116000	70900000	71782000
DLDLGSTK	8	0	847.429	AT4G20860.1	AT4G20860.1	476	483	yes	yes	1;2	0.00056347	178.83	2	2	2	2	2	2	380260000	499050000	437190000	468280000	497230000	552070000
DLDLGTNEGETDAR	14	0	1504.66	AT2G34790.1	AT2G34790.1	481	494	yes	yes	2	6.4093e-142	267.07	1	1	1	1	1	1	652010000	896120000	777150000	379180000	0	409260000
DLDTVRPVVDWAK	13	1	1512.79	AT3G63140.1	AT3G63140.1	168	180	yes	yes	2;3	1.1628e-07	159.99	2	2	2	2	2	2	80433000	86222000	73179000	91725000	80160000	82820000
DLDVMEELGVK	11	0	1246.61	AT5G25980.3;AT5G25980.1;AT5G25980.2	AT5G25980.3	112	122	yes	no	2	2.2972e-05	145.72	3	3	3	3	3	3	514570000	388950000	547790000	249750000	265310000	336370000
DLESVDR	7	0	832.393	AT1G13900.1	AT1G13900.1	427	433	yes	yes	2	0.021797	116.54	1	1	1	1	1	1	51921000	63978000	61636000	33171000	41289000	34628000
DLFLNTEEFIDAVASK	16	0	1810.9	AT5G14590.1	AT5G14590.1	459	474	yes	yes	2	0.00208	80.69		1					0	9366500	0	0	0	0
DLGINDEVMLLSDGNGEFTGK	21	0	2223.04	AT3G52960.1	AT3G52960.1	161	181	yes	yes	2	0.0049179	61.409						1	0	0	0	0	0	17911000
DLGVQEDK	8	0	902.435	AT1G27950.1	AT1G27950.1	91	98	yes	yes	1;2	5.0789e-11	201.57	2	2	2	2	2	2	599790000	492720000	483840000	559370000	550310000	420980000
DLGYQQDWNVEFGFAK	16	0	1915.87	AT3G18080.1	AT3G18080.1	363	378	yes	yes	2	0.00098497	132.32	1	1	1				13631000	0	11763000	0	0	0
DLHDAIASGNYPEWK	15	0	1714.8	AT1G20620.5;AT1G20620.1;AT1G20620.6;AT1G20620.2;AT1G20620.4;AT1G20620.7	AT1G20620.5	254	268	yes	no	2;3	9.9446e-53	232.98	2	2	2	2	2	2	223580000	220060000	218140000	319100000	275110000	260370000
DLHLFNSNTGIR	12	0	1385.71	AT3G62110.2;AT3G62110.1	AT3G62110.2	306	317	yes	no	2;3	3.2255e-20	167.12	1	2	1	2	2	2	0	0	0	69575000	80284000	90750000
DLKDDKEQEDSETVK	15	2	1777.82	AT5G40450.2;AT5G40450.1	AT5G40450.2	426	440	yes	no	3	0.01356	53.169	1	1	1				13668000	11565000	8777000	0	0	0
DLLEQFTSEVAQLQGR	16	0	1832.93	AT1G06290.1	AT1G06290.1	536	551	yes	yes	2;3	6.842e-20	151.1		1	1	2	1		0	8809400	15719000	0	12280000	0
DLLFVRPDAVFNK	13	1	1532.84	AT5G66530.4;AT5G66530.3;AT5G66530.2;AT5G66530.1	AT5G66530.4	49	61	yes	no	2;3	0.00027717	97.779	1	1	2	2	2	2	14001000	11708000	37929000	39625000	43842000	35673000
DLLGNSAAAR	10	0	986.515	AT1G13900.1	AT1G13900.1	180	189	yes	yes	2	1.0428e-06	154.12	1	1	1	1	1	1	79091000	96503000	86654000	0	64006000	45771000
DLLGSLTPILDFHVK	15	0	1666.93	AT5G42100.2;AT5G42100.1	AT5G42100.2	177	191	yes	no	2;3	0.00031825	116.24	2	2	2	2	2	2	30871000	24873000	31344000	37285000	36418000	34188000
DLNLIIEPGR	10	0	1138.63	AT5G11880.1;AT3G14390.1	AT5G11880.1	339	348	yes	no	2	0.018639	91.584		1		1	1	1	0	12852000	0	13131000	12217000	13552000
DLPQTYWPYGK	11	0	1366.66	AT3G14210.1	AT3G14210.1	58	68	yes	yes	2	0.0061322	99.802	1	1		1	1	1	81619000	135860000	0	120570000	127310000	123450000
DLSASSMIGAR	11	0	1106.54	AT3G26380.1;AT3G26380.2	AT3G26380.1	299	309	yes	no	2	5.9518e-15	189.7	2	2	2	2	2	2	149270000	192800000	155250000	167860000	192440000	294200000
DLSELDCAQCFATAVGSFMTTCHNK	25	0	2862.21	AT5G48540.1	AT5G48540.1	197	221	yes	yes	3	2.8911e-144	280.8	2	2	2	2	2	2	193240000	163880000	196960000	236490000	243410000	266570000
DLSGYYLAAR	10	0	1127.56	AT3G26720.1;AT3G26720.2;AT3G26720.5;AT3G26720.4;AT3G26720.3	AT3G26720.1	373	382	yes	no	2	1.1029e-06	153.71	1	1	1	1	1	1	256950000	339190000	221050000	133970000	133350000	158560000
DLSSDLQK	8	0	904.45	AT3G63190.1	AT3G63190.1	245	252	yes	yes	2	0.0042653	139.68	1	1	1		1	1	80629000	108420000	85567000	0	88547000	85543000
DLSSIGDTVVISVTK	15	0	1532.83	AT1G07370.1;AT2G29570.1	AT1G07370.1	150	164	yes	no	2	3.0706e-05	140.91	1	1	1	1	1	1	18367000	14295000	23579000	21632000	21163000	20440000
DLSSMLTSAVANPEAASGNIFNCVSDR	27	0	2825.3	AT3G63140.1	AT3G63140.1	278	304	yes	yes	3	1.5513e-44	190.37	1	1	1			1	8531400	8002900	6746600	0	0	11204000
DLSSNTLKPPVDYTLVGNTESLK	23	1	2490.29	AT2G44260.1;AT2G44260.2	AT2G44260.1	114	136	yes	no	3	3.6775e-08	100.47	1	1	1	1	1	1	38860000	34474000	31932000	18859000	25276000	24714000
DLSSTCTNHLDPTSCFFPQNLVSDIK	26	0	2995.37	AT3G62060.1;AT3G62060.2	AT3G62060.1	260	285	yes	no	3	6.8659e-14	145.33	1	1	1	1	1	1	74115000	77157000	87968000	130670000	129550000	147010000
DLSVVGGTGDFFMAR	15	0	1570.74	AT4G23690.1	AT4G23690.1	145	159	yes	yes	2	1.5389e-12	166.14	1	1	1	1	1	1	30081000	17006000	33621000	16315000	13905000	23551000
DLSVVGGTGDFFMSR	15	0	1586.74	AT1G64160.1	AT1G64160.1	140	154	yes	yes	2	0.00076142	117.2	1		1		1		69156000	0	61167000	0	26897000	0
DLTFQNTAGPDAHQAVAFR	19	0	2057.99	AT5G09760.1;AT5G09760.2	AT5G09760.1	334	352	yes	no	2;3	1.1278e-129	287.04	2	1	1	2	2	2	1122800000	302810000	547240000	495230000	456080000	495740000
DLTFVQLNQLIGR	13	0	1515.84	AT3G19170.1;AT3G19170.2	AT3G19170.1	693	705	yes	no	2	2.2947e-112	299.1	1	1	1	1	1	1	19164000	17491000	15237000	19568000	24619000	20414000
DLVADDK	7	0	774.376	AT1G49750.1	AT1G49750.1	136	142	yes	yes	2	0.013662	124.34		1		1	1	1	0	181110000	0	116140000	136640000	101310000
DLVGVLEDAIR	11	0	1198.66	AT1G55490.5;AT1G55490.4;AT1G55490.3;AT1G55490.2;AT1G55490.1	AT1G55490.5	286	296	no	no	2	2.6855e-08	189.72	1	1	1	1	1	1	110420000	96104000	95408000	73457000	66994000	56994000
DLVLLSGAHTIGVSHCSSFSNR	22	0	2356.16	AT4G11290.1	AT4G11290.1	184	205	yes	yes	3	1.3214e-44	169.84	1	1	1	1	1	1	42429000	49135000	62810000	60503000	54595000	66490000
DLVLLSGAHTIGVSHCSSFTNR	22	0	2370.18	AT1G05260.1	AT1G05260.1	183	204	yes	yes	3	2.4383e-09	145.02	1		1		1	1	46857000	0	55092000	0	48952000	46953000
DLVSHVAAVSK	11	0	1124.62	AT5G10560.1	AT5G10560.1	531	541	yes	yes	2	4.3881e-36	231.38	1	1	1	1	1	1	387470000	380490000	380280000	720980000	730810000	612760000
DLVTLVGGGHTIGTAACGFITNR	23	0	2329.18	AT5G39580.1	AT5G39580.1	179	201	yes	yes	3	7.1648e-10	116.45	1	1	1				10245000	7635100	9222200	0	0	0
DLVVEETEKPIEETEEAQVETPEVVEIK	28	1	3210.59	AT1G62480.1	AT1G62480.1	54	81	yes	yes	3	1.9135e-21	150.22	1	1	1	1	1	1	1534300000	1355300000	1731700000	1082000000	1137500000	1112100000
DLVVLVGGHTIGTAGCGVFR	20	0	2027.06	AT5G64120.1	AT5G64120.1	189	208	yes	yes	2;3	2.2294e-100	212.55	2	2	2	2	1	1	128150000	129810000	199710000	110530000	59310000	53348000
DLWEHQTLK	9	0	1168.59	AT5G08380.1	AT5G08380.1	377	385	yes	yes	2;3	4.6612e-15	203.29	2	2	2	2	2	2	1064800000	1208100000	1182900000	1318800000	1443400000	1576600000
DLWEHSTYSCVK	12	0	1523.67	AT5G08370.2;AT5G08370.1	AT5G08370.2	337	348	yes	no	2;3	1.1549e-80	274.31	2	2	2	2	2	2	339300000	334410000	316610000	525420000	436220000	451760000
DLYEQLIANK	10	0	1205.63	AT1G32060.1	AT1G32060.1	377	386	yes	yes	2	1.2945e-14	193.29	1	1	1	1	1	1	69789000	92623000	89328000	36242000	43403000	36883000
DLYLLPALPADK	12	0	1327.74	AT4G34260.1	AT4G34260.1	760	771	yes	yes	2	0.00057795	112.83	1	1	1	1	1	1	37937000	37487000	39855000	32502000	32320000	29594000
DMDVLLASDDNCLLGTWLESAK	22	0	2465.15	AT5G13690.1	AT5G13690.1	669	690	yes	yes	2;3	8.2831e-36	184.31	3		2	3	2	1	32576000	0	22466000	35226000	19387000	18210000
DMNVIEVPTFLFIR	14	0	1692.89	AT1G76080.1	AT1G76080.1	259	272	yes	yes	2	1.6153e-13	172.11	1	1	1		1	1	12762000	12774000	13340000	0	0	12044000
DMTFENYAGPAK	12	0	1342.59	AT5G53370.1;AT5G53370.2	AT5G53370.1	366	377	yes	no	2	0.014121	80.688	1		1				19082000	0	11090000	0	0	0
DMTIQLK	7	0	847.447	AT5G63180.1;AT4G24780.2;AT4G24780.1	AT5G63180.1	156	162	no	no	2	0.03107	108.98	1	1	1	1	1	1	29199000	15987000	24106000	14548000	17729000	21876000
DMVALSGAHTIGQSR	15	0	1541.76	AT5G05340.1	AT5G05340.1	189	203	yes	yes	2;3	7.2993e-77	258.53	4	3	4	4	4	4	192360000	152500000	196890000	261300000	276650000	374960000
DNGLLLHIHR	10	0	1186.66	ATCG00490.1	ATCG00490.1	286	295	yes	yes	1;2;3	1.1828e-128	292.78	2	2	3	2	3	3	3279200000	4529400000	3873600000	4443700000	4403200000	4167400000
DNGPDFGAASDGDGDR	16	0	1564.6	AT5G51820.1	AT5G51820.1	336	351	yes	yes	2	0.00091938	110.9	1	1	1	1	1	1	20969000	25355000	23095000	29837000	37321000	24754000
DNIPFSHGR	9	0	1041.5	AT1G53070.1	AT1G53070.1	64	72	yes	yes	2	1.0154e-06	173.73	1	1	1	1	1	1	1364100000	1401100000	1253900000	1337300000	1558900000	1394300000
DNLTLWTSDISEEGGDDAHK	20	0	2201.97	AT2G42590.1;AT2G42590.3	AT2G42590.1	229	248	yes	no	3	0.00096645	65.216			1		1	1	0	0	25667000	0	27340000	26275000
DNLTLWTSDLNEEGDER	17	0	2005.89	AT1G22300.2;AT1G22300.1	AT1G22300.2	227	243	yes	no	2	1.1813e-131	256.95	1	1	1			1	0	19678000	0	0	0	19687000
DNLVFLQK	8	0	975.539	AT2G33530.1	AT2G33530.1	153	160	yes	yes	2	0.0093039	125.08	1	1	1	1		1	40234000	48761000	31868000	14049000	0	10097000
DNNLLGK	7	0	772.408	AT3G12580.1;AT5G02500.1	AT3G12580.1	458	464	no	no	2	0.051633	95.793	1	1			1	1	33116000	41917000	0	0	24736000	17398000
DNPETNECR	9	0	1133.44	AT3G62410.1	AT3G62410.1	119	127	yes	yes	2	5.5439e-15	201.39	1	1	1	1	1	1	76863000	109420000	78772000	48017000	44780000	53339000
DNTACPANGFYTYESFVQATR	21	0	2411.05	AT1G02360.1;AT1G02360.2;AT1G02360.3	AT1G02360.1	47	67	yes	no	2;3	2.7349e-10	160.47	1	1		2	1		8600600	10788000	0	25178000	16144000	0
DNTFVYMCGLK	11	0	1346.6	AT1G20020.1;AT1G20020.3;AT1G20020.2;AT5G66190.1;AT5G66190.2	AT1G20020.1	320	330	no	no	2	0.010344	92.062	1	1		2	2	1	29243000	14088000	0	41166000	49915000	43315000
DNVISTPEIK	10	0	1114.59	AT3G49680.2;AT3G49680.1;AT5G65780.1	AT3G49680.2	304	313	yes	no	2	0.025738	83.948		1			1	1	0	18630000	0	0	0	0
DPASGSVTIGSPATK	15	0	1386.7	AT3G46550.1	AT3G46550.1	139	153	yes	yes	2	9.9697e-208	356.06	1	1	1	1	1	1	247580000	316770000	290010000	448320000	431430000	428420000
DPDFSTFNHYLSATHLADEINR	22	0	2562.18	AT4G12730.1	AT4G12730.1	36	57	yes	yes	3;4	6.8259e-203	270.68	2	2	2	2	2	2	67085000	70717000	74983000	146710000	136390000	162330000
DPDGYTFELIQR	12	0	1452.69	AT1G11840.4;AT1G11840.3;AT1G11840.2;AT1G11840.1;AT1G11840.6;AT1G11840.5	AT1G11840.4	130	141	yes	no	2	1.635e-149	328.54	1	1	1	1	1	1	102310000	100960000	124740000	82661000	98977000	110130000
DPDGYWIEIFDLK	13	0	1609.77	AT1G08110.3;AT1G08110.2;AT1G08110.1;AT1G08110.4	AT1G08110.3	163	175	yes	no	2	9.2264e-22	194.5	1	1	1	1	1	1	10221000	5327700	10822000	13358000	14098000	10648000
DPEDLNK	7	0	829.382	AT3G56060.1	AT3G56060.1	438	444	yes	yes	2	0.012886	125.62	1		1	1	1	1	19416000	0	15893000	18138000	17588000	11668000
DPGWIFDTVMK	11	0	1307.62	AT1G13900.1	AT1G13900.1	211	221	yes	yes	2	0.045923	81.865			1				0	0	4813200	0	0	0
DPHRPAEDVAYSVAR	15	1	1681.82	AT5G63810.1	AT5G63810.1	270	284	yes	yes	3	1.4641e-12	133.87	1	1	1	1	1	1	276260000	426920000	342970000	211470000	207720000	263100000
DPMNPTCSK	9	0	1048.43	AT2G04690.3;AT2G04690.2;AT2G04690.1;AT2G04690.5	AT2G04690.3	123	131	yes	no	2	8.6004e-07	173.48	2	2	3	3	3	3	146030000	162380000	163260000	153300000	157700000	246530000
DPNATIIMLGTGTGIAPFR	19	0	1944.01	AT5G66190.1;AT5G66190.2	AT5G66190.1	206	224	yes	no	2;3	1.1188e-79	250.52	3	3	2	3	3	3	48595000	35336000	24094000	71364000	63299000	68059000
DPNATVIMLATGTGIAPFR	19	0	1944.01	AT1G20020.1;AT1G20020.3;AT1G20020.2	AT1G20020.1	215	233	yes	no	2;3	8.2093e-65	280.87	4	4	3	3	4	4	79694000	62341000	72270000	49669000	137550000	141370000
DPNQYINWDGVHLTEAMYK	19	0	2293.05	AT3G48460.1	AT3G48460.1	336	354	yes	yes	3	3.8503e-05	119.38	1	1	1				25127000	19082000	32343000	0	0	0
DPSGILSSWK	10	0	1088.55	AT1G33590.1;AT1G33590.3;AT1G33590.2	AT1G33590.1	45	54	yes	no	1;2	1.0702e-35	233.46	3	3	3	3	3	3	3043400000	2647200000	2488000000	4130600000	3872700000	3650800000
DPSTLQYTTVINQR	14	0	1634.83	AT1G03230.1	AT1G03230.1	39	52	yes	yes	2	8.286e-52	234.72	1	2	1	1	1	1	93563000	105760000	136830000	37891000	37287000	41248000
DPSVGSCK	8	0	848.37	AT4G31140.1	AT4G31140.1	440	447	yes	yes	2	0.0050835	136.11	1	1	1	1	1	1	18529000	24267000	20250000	27357000	26892000	20917000
DPTISVFNDIMTPNK	15	0	1690.82	AT3G28200.1	AT3G28200.1	228	242	yes	yes	2	9.43e-07	130.56	1	1					10394000	0	0	0	0	0
DPTQEDPR	8	0	956.42	AT2G20420.1	AT2G20420.1	268	275	yes	yes	2	0.013482	117.39		1					0	25268000	0	0	0	0
DQEPLIVYK	9	0	1103.59	AT4G12730.1	AT4G12730.1	313	321	yes	yes	2	0.0074151	120.87	1	1	1	1	1	1	108950000	132680000	92178000	105530000	112180000	87173000
DQFLQLSSALPENR	14	0	1616.82	AT5G11720.1	AT5G11720.1	178	191	yes	yes	2	5.4544e-14	173.72	1					1	73731000	0	0	0	0	125730000
DQGSCGSCWAFSTIGAVEGINK	22	0	2343.03	AT5G43060.1	AT5G43060.1	155	176	yes	yes	2;3	5.1652e-118	276.22	2	2	2	2	2	2	35087000	39112000	48484000	42620000	41981000	41083000
DQHFFASVEK	10	0	1206.57	AT1G09340.1;AT1G09340.2	AT1G09340.1	319	328	yes	no	2;3	5.9322e-11	175.66	2	1	1	2	2	2	460060000	183410000	159210000	421560000	336060000	386050000
DQHNILEVNK	10	0	1208.61	AT4G12880.2;AT4G12880.1	AT4G12880.2	27	36	yes	no	2;3	4.9592e-58	252.82	2	2	2	2	2	2	395900000	535130000	477140000	290420000	276860000	272270000
DQIGSFYYFPSLAFHK	16	0	1918.93	AT1G41830.1;AT4G22010.1	AT1G41830.1	120	135	no	no	3	0.028442	42.818	1	1	1	1	1	1	5264800	5458600	6543300	7861000	6086700	4846000
DQIGSFYYFPSLGFHK	16	0	1904.91	AT1G76160.1;AT1G21850.1	AT1G76160.1	119	134	no	no	3	1.9753e-05	61.622	1	1		1	1	1	8924500	12125000	0	0	12194000	15110000
DQIGTFNYFPSTAFHK	16	0	1871.88	AT5G66920.1	AT5G66920.1	128	143	yes	yes	3	8.8901e-06	71.685	2	1	1	1		1	34492000	24375000	0	0	0	20581000
DQLNALYNYGAR	12	0	1396.67	AT1G29660.1	AT1G29660.1	202	213	yes	yes	2	4.249e-21	255.14	1	1	1	1	1	1	1847700000	1377400000	1537000000	1156700000	1141200000	1418400000
DQLPLVLEALER	12	0	1394.78	AT5G62530.1	AT5G62530.1	455	466	yes	yes	2	0.00039214	117.52					1	1	0	0	0	0	9039000	14152000
DQNGFISAAELR	12	0	1319.65	AT5G37780.1;AT1G66410.1;AT1G66410.2;AT5G37780.2;AT5G37780.3;AT5G37780.4;AT3G43810.4;AT3G43810.3;AT1G66410.4;AT1G66410.3;AT5G21274.1;AT3G56800.1;AT3G43810.1;AT2G41110.1;AT2G27030.1;AT2G27030.3;AT3G43810.2;AT2G41110.2	AT5G37780.1	96	107	no	no	2	0.0018485	103.34	1						14394000	0	0	0	0	0
DQSDEVSADETVPK	14	0	1518.67	AT5G40450.2;AT5G40450.1	AT5G40450.2	2481	2494	yes	no	2	0.010521	73.466	1		1		1	1	8873900	0	9239900	0	9995500	8992100
DQSTLQYTTVINQR	14	0	1665.83	AT1G03220.1	AT1G03220.1	38	51	yes	yes	2;3	2.9573e-121	350.47	2	2	1	3	2	2	1123100000	2543700000	1679200000	1601500000	1697600000	1853100000
DQTPADLIIPVCDGGNR	17	0	1839.88	AT5G05480.1	AT5G05480.1	211	227	yes	yes	2	0.0026431	75.78		1		1	1		0	23084000	0	19587000	20772000	0
DQVLAALAPVR	11	0	1151.67	AT5G45280.2	AT5G45280.2	309	319	yes	yes	2;3	6.0184e-15	222.42	3	3	2	3	3	3	3273800000	3493200000	2957900000	3835400000	3617300000	3071800000
DQYIGISTVQATDK	14	0	1537.76	AT1G58370.1;AT1G58370.2	AT1G58370.1	296	309	yes	no	2	3.1824e-08	152.55	1	1	1	1	1	1	49312000	154640000	54277000	68038000	40023000	54611000
DQYLEISTSLPK	12	0	1392.71	AT1G68560.1;AT3G45940.1	AT1G68560.1	162	173	yes	no	2	1.1557e-08	155.33	1	1	1	1	1	1	616760000	505040000	568270000	418550000	451250000	386020000
DREIENK	7	1	902.446	AT1G31690.1	AT1G31690.1	610	616	yes	yes	2	3.6258e-15	198.92	1	1	1				62355000	80532000	0	0	0	0
DRETILVEGLK	11	1	1271.71	AT4G35220.1	AT4G35220.1	230	240	yes	yes	2	0.0022875	119.74	1	1	1	1	1	1	32919000	31356000	0	38798000	0	34072000
DRPFVTSTIIGATSVK	16	1	1690.93	AT1G04420.1	AT1G04420.1	360	375	yes	yes	2	5.5734e-07	157.86	1	1	1	1	1	1	28791000	21095000	18682000	52313000	46109000	36555000
DRTGLLLPGYQQDLVTR	17	1	1944.04	AT5G49360.1	AT5G49360.1	503	519	yes	yes	2;3	0.00074831	140.84	2	2	1	2	2	2	70474000	61892000	37168000	153780000	152610000	122050000
DRVDLHLPGQQQELVIQVAK	20	1	2285.25	AT5G64570.1;AT5G64570.3;AT5G64570.2	AT5G64570.1	515	534	yes	no	2;3;4	2.3346e-33	199.61	3	3	3	3	3	3	952220000	602690000	888290000	1323400000	1475200000	1219900000
DSDEVPHNNPK	11	0	1250.55	AT3G10520.1	AT3G10520.1	52	62	yes	yes	2	9.5095e-28	223.84			1				0	0	114570000	0	0	0
DSEGQLVPHPETFPSGIK	18	0	1936.95	AT3G56310.1	AT3G56310.1	124	141	yes	yes	3	0.00015227	87.157	1	1	1			1	30712000	35620000	37058000	0	0	22016000
DSENHFSLVGCTCAPAFQFEDFELAK	26	0	3018.32	AT1G19130.1	AT1G19130.1	145	170	yes	yes	3	1.3252e-11	128.97	1	1	1	1		1	10225000	14150000	17217000	17031000	0	17330000
DSFVNAANTFPNFANSVTR	19	0	2070.98	AT2G43590.1	AT2G43590.1	97	115	yes	yes	2;3	2.2275e-129	346.54	2	2	2	2	2	2	203150000	208690000	247200000	295920000	329430000	311050000
DSGCLDSDILAAFDAAVR	18	0	1894.87	AT4G34980.1	AT4G34980.1	249	266	yes	yes	2	1.1666e-64	231.06	1	1	1	1	1	1	20262000	15215000	16784000	10267000	9120000	6716300
DSGLLILTAGK	11	0	1086.63	AT1G80600.1	AT1G80600.1	415	425	yes	yes	2	9.465e-10	166.07	1	1	1	1	1	1	23566000	29334000	23145000	24056000	27522000	32527000
DSIIGAVPR	9	0	926.519	AT3G15360.1	AT3G15360.1	172	180	yes	yes	1;2	0.0046136	147.04	2	2	2	2	2	2	369660000	436380000	344460000	520990000	549960000	577880000
DSIMDSTVNCR	11	0	1296.54	AT1G11860.1;AT1G11860.2;AT1G11860.3	AT1G11860.1	66	76	yes	no	2	3.3945e-07	150.36		2	1	1	1	1	0	31301000	24213000	16860000	11750000	23193000
DSIVAIGGPTWNVPTGR	17	0	1738.9	AT4G11290.1	AT4G11290.1	130	146	yes	yes	2	1.1561e-49	221.8	1	1	1	1	1	1	266900000	187540000	310450000	232240000	266500000	226260000
DSLANFQSAR	10	0	1107.53	AT1G14540.1	AT1G14540.1	85	94	yes	yes	2	0.0045547	118.71	2	1	1			1	46428000	34501000	43305000	0	0	0
DSNDGSEHALLVELEALENHLK	22	0	2432.18	AT1G19570.1	AT1G19570.1	114	135	yes	yes	3;4	1.7249e-84	242.34	2	2	2	2	2	2	597090000	402640000	524080000	837010000	824000000	695150000
DSNWILPIEK	10	0	1213.63	AT1G78460.1	AT1G78460.1	177	186	yes	yes	2	0.0096371	104.42	1	1		1		1	10143000	9793400	0	12931000	0	10983000
DSPANLSLR	9	0	971.504	AT4G33420.1;AT4G33420.2	AT4G33420.1	101	109	yes	no	2	0.0075113	120.46	1	1	1	1	1	1	86690000	87474000	68218000	95234000	97156000	108470000
DSPEHYGYR	9	0	1122.47	AT5G63180.1	AT5G63180.1	216	224	yes	yes	2;3	0.00042599	173.28	2	2	2	1	1	1	48546000	60420000	67833000	31951000	37867000	35891000
DSPYNALGTGLVYTSDVGLVSSGK	24	0	2399.19	AT1G51805.1;AT1G51805.2	AT1G51805.1	37	60	yes	no	2;3	2.7013e-48	256.28	1	2	2	2	2	2	14399000	28602000	38583000	48326000	51115000	47844000
DSQDALGPLVDVALK	15	0	1539.81	AT1G70730.1;AT1G70730.3;AT1G70730.2	AT1G70730.1	554	568	yes	no	2	0.00051853	123.95	1	1	1	1	1	1	21420000	27873000	23456000	30200000	33144000	27555000
DSQGSLVAK	9	0	903.466	AT5G08370.2;AT5G08370.1	AT5G08370.2	65	73	yes	no	2	0.0089558	114.28	1	1	1	1	1	1	1094100000	1018400000	856720000	1073500000	1124600000	1088300000
DSSGPTTDMLADALAIAQHHDAVSGTQR	28	0	2864.34	AT3G26720.1;AT3G26720.2;AT3G26720.5;AT3G26720.4;AT3G26720.3	AT3G26720.1	391	418	yes	no	3;4	6.9593e-28	167.23	6	5	7	5	6	6	711180000	558260000	595440000	587550000	524850000	621050000
DSSINLK	7	0	775.408	AT5G08260.1	AT5G08260.1	211	217	yes	yes	2	0.039853	103.29	1	1	1	1	1	1	58786000	65252000	49110000	54614000	60568000	56193000
DSSINLSLPGDGFDVIVR	18	0	1902.97	AT3G28200.1	AT3G28200.1	85	102	yes	yes	2	7.1694e-79	240.37	2	2	2	2	2	1	293710000	204760000	255000000	282750000	302540000	177930000
DSSINLSLPGDGFDVVIR	18	0	1902.97	AT5G40150.1	AT5G40150.1	96	113	yes	yes	2	1.3078e-64	230.06	1			1	1	1	0	0	0	89174000	105980000	55838000
DSSTSELGSAGLR	13	0	1278.61	AT5G18470.1	AT5G18470.1	61	73	yes	yes	2	6.4365e-09	196.52	1	1	1	1	1	1	58814000	88023000	83914000	90284000	97419000	89653000
DSSVFLSTSQLPPTFK	16	0	1752.89	AT1G19130.1	AT1G19130.1	32	47	yes	yes	2	9.1481e-06	109.24	1				1	1	0	0	0	0	0	9275600
DSTITVTLAPENVK	14	0	1486.79	AT3G16530.1	AT3G16530.1	213	226	yes	yes	1;2;3	2.5561e-92	326.43	5	4	5	4	4	4	9221600000	8534400000	10267000000	10951000000	12138000000	11627000000
DSTLIMQLLR	10	0	1188.65	AT1G35160.1;AT1G35160.2;AT1G78300.1;AT4G09000.1;AT4G09000.2;AT5G10450.2;AT5G10450.1;AT5G10450.3;AT5G10450.4;AT5G16050.2;AT5G16050.1;AT3G02520.2;AT3G02520.1;AT5G38480.3;AT5G38480.2;AT5G38480.1;AT5G65430.2;AT5G65430.1;AT5G65430.3;AT1G22300.2;AT1G22300.1;AT1G22300.3;AT1G34760.2;AT1G34760.1;AT2G42590.1;AT2G42590.3;AT2G42590.2;AT1G26480.1	AT4G09000.1	224	233	no	no	2	1.1269e-14	194.2	2	2	2	2	2	2	50925000	41081000	51021000	39516000	44648000	44664000
DSTTLIADAASKDELQAR	18	1	1903.95	AT2G28000.1	AT2G28000.1	372	389	yes	yes	3	0.014307	60.034		1	1		1		0	21673000	31088000	0	11625000	0
DSVAVQQQK	9	0	1001.51	AT5G64120.1	AT5G64120.1	171	179	yes	yes	2	2.5615e-10	192.31	1	1	1	1	1	1	568550000	770110000	631160000	354450000	393600000	418040000
DSVCVVTQK	9	0	1034.51	AT2G05840.1;AT2G05840.3;AT2G05840.2;AT5G35590.1	AT5G35590.1	46	54	no	no	2	0.007959	102.95	1	1	1	1	1	1	25862000	6817800	21078000	19670000	0	0
DSVFPNSDSFLTGQTNVVER	20	0	2211.04	AT1G66970.3;AT1G66970.1;AT1G66970.2	AT1G66970.3	399	418	yes	no	2	2.2057e-136	284.04	1	1	1	1	1	1	73241000	62004000	81400000	94744000	81497000	77065000
DSVLEVTK	8	0	889.476	AT2G25060.1	AT2G25060.1	74	81	yes	yes	1;2	0.01925	147.29	2	2	2	2	2	2	123680000	109080000	113640000	102700000	111610000	101750000
DSVLQVTR	8	0	916.498	AT4G31840.1	AT4G31840.1	70	77	yes	yes	2	0.049664	90.37	1				1	1	64720000	0	0	0	54403000	63578000
DSVTEVVR	8	0	903.466	AT2G24270.3;AT2G24270.1;AT2G24270.4;AT2G24270.2	AT2G24270.3	109	116	yes	no	2	0.035369	96.285	1	1	1	1	1	1	57114000	59501000	45000000	55346000	45010000	53097000
DSVVALGGPNWNVK	14	0	1454.75	AT5G05340.1	AT5G05340.1	135	148	yes	yes	2	6.6946e-35	210.64	1	1	1	1	1	1	90183000	108010000	88696000	257290000	213040000	192810000
DTCATAAPDGSDDLSIIPINAK	22	0	2244.06	AT1G09750.1	AT1G09750.1	26	47	yes	yes	2	1.9203e-06	124.39	1	1		1	1		27331000	33389000	0	47231000	28785000	0
DTDILAAFR	9	0	1020.52	ATCG00490.1	ATCG00490.1	33	41	yes	yes	1;2	7.5835e-66	267.87	3	5	4	4	4	3	17265000000	27328000000	19811000000	17628000000	21063000000	19726000000
DTDNTAEALSAPQELVQEVLSK	22	0	2357.16	AT4G15210.4;AT4G15210.3;AT4G15210.1;AT4G15210.2	AT4G15210.4	298	319	yes	no	2;3	9.1576e-100	257.37	1	1	2	2	2	2	35565000	49324000	63963000	66968000	70580000	42460000
DTDSEEELK	9	0	1064.45	AT5G37780.1;AT1G66410.1;AT1G66410.2;AT5G37780.2;AT5G37780.3;AT5G37780.4;AT3G43810.4;AT3G43810.3;AT1G66410.4;AT1G66410.3;AT5G21274.1;AT3G56800.1;AT3G43810.1;AT2G41110.1;AT2G27030.1;AT2G27030.3;AT3G43810.2;AT2G41110.2	AT5G37780.1	79	87	no	no	2	3.1402e-10	190.51	1	1	1	1	1	1	347320000	382640000	273200000	313290000	309550000	243590000
DTDSEEELKEAFR	13	1	1567.7	AT5G37780.1;AT1G66410.1;AT1G66410.2;AT5G37780.2;AT5G37780.3;AT5G37780.4;AT3G43810.4;AT3G43810.3;AT1G66410.4;AT1G66410.3;AT5G21274.1;AT3G56800.1;AT3G43810.1;AT2G41110.1;AT2G27030.1;AT2G27030.3;AT3G43810.2;AT2G41110.2	AT5G37780.1	79	91	no	no	2;3	1.22e-169	330.68	2	2	2	2	2	2	441850000	481720000	436820000	363530000	331460000	301550000
DTDTPVAEGK	10	0	1031.48	AT3G05900.1;AT3G05900.2	AT3G05900.1	561	570	yes	no	2	0.00034501	135.71	1	1	1	1	1	1	0	79491000	75000000	65460000	73157000	54618000
DTGALFLEAPVSGSK	15	0	1490.76	AT1G17650.2;AT1G17650.1	AT1G17650.2	117	131	yes	no	2	0.0015442	112.84	1	1	1		1	1	15768000	18804000	14176000	0	17449000	21841000
DTIENVVTPAFFDGIMSK	18	0	1982.97	AT2G43620.1	AT2G43620.1	88	105	yes	yes	2;3	1.5724e-64	228.17	2	3	3	2	3	3	115320000	179880000	227510000	162610000	199500000	296700000
DTIIGAVPK	9	0	912.528	AT4G03520.2;AT4G03520.1	AT4G03520.2	52	60	yes	no	2	0.064866	78.324	1	1	1	1	1	1	68405000	74210000	57143000	71296000	90784000	68183000
DTIIGAVSK	9	0	902.507	AT1G03680.1	AT1G03680.1	160	168	yes	yes	1;2	2.9945e-06	184.04	2	2	2	2	2	2	194100000	248080000	196030000	287210000	274620000	284030000
DTIILAGAEYGSGSSR	16	0	1595.78	AT4G35830.1;AT4G35830.2	AT4G35830.1	770	785	yes	no	2	1.4172e-07	130.44		1	1	1	1	1	0	31107000	0	0	0	20165000
DTILIEAYIDPVCPDCR	17	0	2048.95	AT1G20225.1	AT1G20225.1	42	58	yes	yes	2	2.086e-08	151.78				1			0	0	0	12840000	0	0
DTITGETLSDPENPVVLER	19	0	2084.03	AT1G62750.1	AT1G62750.1	469	487	yes	yes	2	1.0207e-267	322.23	1	1	1	1	1	1	49829000	60676000	37919000	40113000	51037000	0
DTIVPVNNNYVLAPTDLVK	19	0	2084.12	AT1G74210.1	AT1G74210.1	287	305	yes	yes	2	6.5703e-14	163.27	1	1	1	1	1	1	33203000	27769000	40352000	47802000	41376000	46351000
DTLATSINK	9	0	961.508	AT1G03680.1	AT1G03680.1	169	177	yes	yes	2	5.5372e-09	159.04	1	1	1	1	1	1	137590000	0	0	229330000	274920000	215980000
DTLEVDAALIATGR	14	0	1443.76	AT4G16155.1;AT3G16950.1;AT3G16950.2	AT4G16155.1	342	355	yes	no	2	1.0702e-42	265.61	1	1	1	1	1	1	27252000	30105000	31661000	24372000	22716000	26573000
DTLIYPAHDYK	11	0	1334.65	AT1G53580.2;AT1G53580.1	AT1G53580.2	225	235	yes	no	2	0.05519	69.375	1	1		1		1	22425000	24340000	0	20696000	0	7563600
DTSAWVEAGATVGELYYR	18	0	1986.93	AT5G44390.1	AT5G44390.1	151	168	yes	yes	2	2.1118e-65	237.87	1	1	1	1	1	1	14994000	13413000	14065000	23649000	18218000	17704000
DTSDYLWYMTDVK	13	0	1635.71	AT3G13750.1	AT3G13750.1	473	485	yes	yes	2	3.9035e-27	241.03	2	2	2	2	2	2	57441000	51292000	60488000	81387000	76121000	92571000
DTSQDEAGTAAVK	13	0	1291.59	AT3G57410.9;AT3G57410.8;AT3G57410.7;AT3G57410.5;AT3G57410.4;AT3G57410.3;AT3G57410.2;AT3G57410.1;AT3G57410.10;AT3G57410.6;AT2G41740.2;AT2G41740.1	AT3G57410.9	72	84	no	no	2	6.9415e-07	146.11	1	1	1	1	1		27576000	12326000	15885000	19513000	19337000	0
DTTDYLWYTTSITVSENEAFLK	22	0	2596.22	AT5G63810.1	AT5G63810.1	473	494	yes	yes	2;3	2.3973e-08	194.55	1	1	1	2	1	1	28607000	9166400	26309000	50125000	27328000	23694000
DTVILTQGTGWQVPTGR	17	0	1827.95	AT5G64120.1	AT5G64120.1	136	152	yes	yes	2	1.4013e-195	341.27	1	1	1	1	1	1	430990000	398160000	473420000	303290000	282020000	322000000
DTWLSMISIADMNEVYAEHAR	21	0	2451.12	AT5G08380.1;AT5G08380.2	AT5G08380.1	233	253	yes	no	3	3.9997e-54	153.11	1			1	1	2	0	0	0	10477000	14061000	30434000
DTYPDDLLAPVLR	13	0	1486.77	AT2G33150.1	AT2G33150.1	72	84	yes	yes	2	0.0037916	84.268			1	1	1	1	0	0	0	8437200	7616400	13117000
DVASSAAVPSVASWWK	16	0	1659.83	AT5G64260.1	AT5G64260.1	74	89	yes	yes	2	1.4234e-08	185.27	1	1	1	1	1	1	96293000	95618000	87160000	75096000	63506000	68133000
DVCTADNQELAR	12	0	1390.61	AT5G09730.1	AT5G09730.1	386	397	yes	yes	2	1.2377e-43	238.32	1	1	1	1	1	1	73250000	110840000	88705000	93785000	111160000	111450000
DVCTPAHK	8	0	926.428	AT5G49360.1	AT5G49360.1	382	389	yes	yes	2	0.039025	94.662	1	1	1	1	1	1	2421400000	3555300000	2611400000	2798300000	2881700000	3440600000
DVDGHGTHTSTTAAGSAVR	19	0	1838.85	AT2G05920.1	AT2G05920.1	204	222	yes	yes	3;4	2.4122e-141	215.51	2	2	2	2	2	2	565950000	103200000	428690000	246530000	345430000	307810000
DVDIGVNDHGANSYK	15	0	1602.73	AT4G20830.2;AT4G20830.1	AT4G20830.2	483	497	yes	no	2;3	6.2658e-91	328.32	2	2	2	2	2	2	612120000	2001300000	1891600000	1000800000	30204000	858940000
DVDIGVNDHGTNSYEEGEVYGR	22	0	2424.05	AT4G20840.1	AT4G20840.1	482	503	yes	yes	2;3	2.731e-225	405.79	2	2	2	2	2	2	322450000	394180000	419700000	463890000	497310000	544690000
DVDYSSGDVCGVLVQYPGTEGEVLDYGEFVK	31	0	3395.54	AT2G26080.1	AT2G26080.1	277	307	yes	yes	3	6.0104e-16	91.086	1	1	1	1	1	1	29299000	23888000	29624000	32421000	23215000	27784000
DVEITWGDGR	10	0	1146.53	AT5G57560.1;AT4G25810.1	AT5G57560.1	26	35	no	no	2	0.0043517	138.4	1	1	1	1	1	1	38003000	81059000	64208000	69321000	55053000	69079000
DVGDNDPDIYYTNR	14	0	1655.71	AT4G15210.4;AT4G15210.3;AT4G15210.1;AT4G15210.2	AT4G15210.4	63	76	yes	no	2	5.3013e-19	179.19	1	1	1	1	1	1	25853000	35615000	23455000	41109000	32179000	26589000
DVGVFVQDGK	10	0	1062.53	AT1G17860.1	AT1G17860.1	169	178	yes	yes	2	1.8976e-06	169.12	1	1	1	1	1	1	939410000	1023800000	738320000	1118100000	964820000	805460000
DVHFSQDGALLK	12	0	1328.67	AT1G19130.1	AT1G19130.1	129	140	yes	yes	2;3	2.553e-08	134.75	1	1	2	2	2	1	21741000	32690000	22814000	38045000	50498000	19657000
DVIEPLESVSVNLVPTSK	18	0	1925.04	AT3G55330.1	AT3G55330.1	113	130	yes	yes	2	2.0923e-20	180.3	1	1	1	1	1	1	183630000	153150000	165280000	234290000	263340000	241020000
DVIQALR	7	0	813.471	AT3G15730.1	AT3G15730.1	601	607	yes	yes	2	0.029961	109.88	1	1	1	1	1	1	17725000	17067000	17686000	24219000	14290000	13153000
DVLNILHNLQGDLVGADVVEYNPQR	25	0	2790.43	AT4G08870.1	AT4G08870.1	296	320	yes	yes	3	2.0951e-16	153.87	1		1	1		1	32306000	0	28018000	48792000	0	30428000
DVNLSSGER	9	0	975.462	AT3G15356.1;AT3G16530.1	AT3G16530.1	194	202	no	no	1;2	5.704e-06	179.8	4	4	4	5	4	3	12155000000	21234000000	12910000000	14801000000	14799000000	14302000000
DVQEALHAR	9	0	1037.53	AT1G28110.2;AT1G28110.1	AT1G28110.2	322	330	yes	no	2	0.047377	82.75		1	1			1	0	12208000	10677000	0	0	10960000
DVQWLQTITK	10	0	1230.66	AT3G14420.3;AT3G14420.2;AT3G14420.1;AT3G14420.4;AT3G14420.5;AT3G14420.6	AT3G14420.3	215	224	yes	no	2	0.0018334	129.38	2	1	1	1	1	1	8655400	14167000	13629000	15601000	15246000	14464000
DVSGVQYIK	9	0	1007.53	AT4G19420.2;AT4G19420.1;AT4G19420.4;AT4G19420.3	AT4G19420.2	209	217	yes	no	2	0.048589	98.418	1	1	1	1		1	29168000	30117000	38420000	33316000	0	36552000
DVSHVQATVVCAK	13	0	1412.71	AT1G26380.1	AT1G26380.1	85	97	yes	yes	2	8.1811e-18	178.71	1	1	1		1	1	15692000	16241000	9733800	0	15287000	21397000
DVSLHDVR	8	0	939.477	AT5G12950.1	AT5G12950.1	106	113	no	no	2	0.0029661	145.34	1	1	1	1	1	1	50729000	74770000	71621000	59439000	50378000	66239000
DVSVDIADQSAWISAGATLGEVYYR	25	0	2685.29	AT4G20840.1	AT4G20840.1	142	166	yes	yes	3	1.0391e-12	141.69	1			1	1		9636400	0	0	14716000	17047000	0
DVSVDIASNSAWISAGATLGEVYYR	25	0	2643.28	AT4G20830.2;AT4G20830.1	AT4G20830.2	143	167	yes	no	3	0.0018601	45.305			1				0	0	10075000	0	0	0
DVTAHFDISR	10	0	1159.56	AT3G26380.1;AT3G26380.2	AT3G26380.1	289	298	yes	no	2;3	1.183e-35	232.83	1	2	2	2	2	2	328000000	305750000	469710000	685000000	780140000	794190000
DVTELIGNTPLVYLNNVAEGCVGR	24	0	2602.31	AT4G14880.5;AT4G14880.4;AT4G14880.3;AT4G14880.2;AT4G14880.1	AT4G14880.5	8	31	yes	no	2;3	2.9592e-48	266.42		1	1	1		1	0	28960000	42796000	13966000	0	42546000
DVTVEGLCMNR	11	0	1292.59	AT5G09440.1	AT5G09440.1	134	144	yes	yes	2	4.9335e-13	186.76	2	2	2	2	2	2	105620000	129120000	140390000	80522000	97338000	130780000
DVVNLAGGPQYAVELGR	17	0	1756.91	AT4G37530.1;AT4G37530.2	AT4G37530.1	135	151	yes	no	2	1.1992e-37	232.53	1	1	1	1	1	1	366380000	329540000	341080000	407450000	390910000	429950000
DVVNLAGGPQYDVELGR	17	0	1800.9	AT4G37520.1	AT4G37520.1	135	151	yes	yes	2	1.2462e-05	173.59	1	1	1		1	1	56724000	84708000	84918000	0	77818000	98451000
DVYEIQIVPR	10	0	1230.66	AT2G46570.1;AT2G46570.2	AT2G46570.1	213	222	yes	no	2	0.00018553	141.48	1	1	1	1		1	12290000	20615000	12036000	0	0	11314000
DVYSVWALPDEESEPR	16	0	1890.86	AT4G18930.1	AT4G18930.1	7	22	yes	yes	2	1.2197e-05	144.47	1	1				1	14366000	10585000	0	0	0	0
DWLESQGHQYIVTDDK	16	0	1932.89	AT5G14780.3;AT5G14780.2;AT5G14780.1	AT5G14780.3	41	56	yes	no	2	0.00016495	132.14				1			0	0	0	23991000	0	0
DWLESQGHQYIVTDDKEGPDCELEK	25	1	2990.32	AT5G14780.3;AT5G14780.2;AT5G14780.1	AT5G14780.3	41	65	yes	no	3	2.9895e-21	161.49		1	1	1	1		0	26870000	24922000	65947000	47915000	0
DYADLCFELFGDR	13	0	1619.69	AT5G26000.2;AT5G26000.1	AT5G26000.2	184	196	yes	no	2	2.5155e-54	241.4	1	1	1	1	1	1	211580000	51310000	154270000	222310000	228410000	130600000
DYADLCFER	9	0	1187.49	AT5G25980.3;AT5G25980.1;AT5G25980.2	AT5G25980.3	196	204	yes	no	2	3.4879e-07	178.65	1	1	1	1	1	1	247730000	284220000	258520000	158050000	163430000	192560000
DYAEAHAK	8	0	903.409	AT1G77490.2;AT1G77490.1	AT1G77490.2	328	335	yes	no	2	0.057216	87.323				1	1	1	0	0	0	6479600	6488900	6498100
DYCDENATQYPCNPNK	16	0	1987.77	AT3G54420.1	AT3G54420.1	152	167	yes	yes	2;3	1.2349e-218	351.39	2	1	2	2	1	1	115330000	176230000	160600000	160370000	161970000	120280000
DYCGQLGVDPGPNLSC	16	0	1750.73	AT2G43590.1	AT2G43590.1	249	264	yes	yes	2	8.1511e-09	159.44	1	1	1	1	1	1	91849000	213780000	134720000	194610000	141950000	144070000
DYDYGFLK	8	0	1019.46	AT1G13750.1	AT1G13750.1	557	564	yes	yes	2	0.059323	86.472	1	1		1	1	1	8500600	12863000	0	11181000	8760800	11230000
DYFELVNIQNVGGAGSIK	18	0	1922.97	AT1G20190.2;AT1G20190.1	AT1G20190.2	109	126	yes	no	2;3	6.3967e-65	234.82	2	2	2	1	1	2	76467000	78041000	82298000	46973000	55252000	65335000
DYLTNLK	7	0	865.455	AT3G18080.1	AT3G18080.1	445	451	yes	yes	2	0.065102	90.986	1	1	1				10871000	20126000	16293000	0	0	0
DYSSLATGK	9	0	940.45	AT1G72230.1	AT1G72230.1	36	44	yes	yes	2	0.021372	95.815	1	1		1	1	1	19108000	17616000	0	28655000	20227000	21890000
DYVSGFPTESDFDFTTTTVELR	22	0	2526.14	AT5G16970.1	AT5G16970.1	12	33	yes	yes	2;3	3.489e-35	176.32		2		1	2	1	0	15666000	0	0	41850000	10087000
DYYVVVSSR	9	0	1086.53	AT1G41830.1;AT1G76160.1	AT1G76160.1	271	279	no	no	1;2	1.3934e-06	190.52	2	2	2	2	2	2	1069300000	1288400000	1060300000	1474200000	1580800000	1786000000
EAADQSLEAYK	11	0	1223.57	AT1G22300.2;AT1G22300.1;AT1G22300.3	AT1G22300.2	144	154	yes	no	2	2.2344e-06	147.95	1	1	1	1	1	1	22172000	26588000	19708000	16076000	13263000	19688000
EAAESTLVAYK	11	0	1180.6	AT5G16050.2;AT5G16050.1;AT3G02520.2;AT3G02520.1;AT5G38480.3;AT5G38480.2;AT5G38480.1	AT5G38480.3	145	155	no	no	2	0.0054752	101.65	1	1					38596000	0	0	0	0	0
EAAWGLAR	8	0	872.45	AT4G38970.1;AT4G38970.2;AT2G21330.1;AT2G21330.3;AT2G21330.2;AT2G01140.1	AT4G38970.1	203	210	no	no	1;2	3.2405e-11	205.82	2	2	2	1	2	2	771030000	561230000	626610000	418070000	547820000	794220000
EACAILHAAGPSK	13	0	1323.66	AT5G37850.4;AT5G37850.2;AT5G37850.3;AT5G37850.1	AT5G37850.4	177	189	yes	no	2	0.0091132	78.692						2	0	0	0	0	0	7665800
EADATVLVMGLDQSIEAETR	20	0	2147.04	AT5G49360.1	AT5G49360.1	483	502	yes	yes	2;3	1.4037e-136	302.35	9	5	8	13	7	9	3168200000	1627000000	2444500000	4002300000	3814100000	4316300000
EADDLLSQGTYLGPLHGIPYGLK	23	0	2456.26	AT5G07360.2;AT5G07360.3;AT5G07360.1	AT5G07360.2	254	276	yes	no	3	2.3098e-05	78.987	1	1	1	1	1	1	11069000	7310100	15798000	15805000	0	16815000
EADFTTDDMILSK	13	0	1484.67	AT1G09340.1;AT1G09340.2	AT1G09340.1	361	373	yes	no	2	2.7317e-09	158.41	1	1	1	1	1	1	89583000	62456000	75442000	39812000	47756000	66016000
EADLISLHPVLDK	13	0	1448.79	AT1G68010.1;AT1G68010.2;AT1G68010.3	AT1G68010.1	236	248	yes	no	2;3	1.5797e-54	298.58	2	2	2	2	2	2	534230000	511280000	492520000	526780000	590020000	541410000
EADLVTNLPGQPDVSFK	17	0	1828.92	AT4G15100.1	AT4G15100.1	41	57	yes	yes	2	2.6912e-49	215.77	1			1			19202000	0	0	92641000	0	0
EADVDGDGQINYEEFVK	17	0	1926.85	AT5G37780.1;AT1G66410.1;AT1G66410.2;AT5G37780.2;AT5G37780.3;AT5G37780.4;AT3G43810.4;AT3G43810.3;AT1G66410.4;AT1G66410.3;AT5G21274.1;AT3G56800.1;AT3G43810.1;AT2G41110.1;AT2G27030.1;AT2G27030.3;AT3G43810.2;AT2G41110.2	AT5G37780.1	128	144	no	no	2;3	5.4474e-63	297.5	2	2	1	1	2	2	779190000	596730000	705400000	571830000	585290000	612400000
EAEASPSPVGVGDAFSNVK	19	0	1859.89	AT5G66090.1	AT5G66090.1	64	82	yes	yes	2	1.4317e-20	176.86	1	1	1	1	1	1	42646000	61178000	49357000	64789000	62813000	80484000
EAEEFAEEDKK	11	1	1323.58	AT5G28540.1;AT5G42020.3;AT5G42020.1	AT5G42020.3	557	567	no	no	2;3	5.4038e-12	172.59	2	3	3	2	1	2	71557000	79612000	39820000	53906000	18879000	62785000
EAEEVEPILEALPK	14	0	1565.82	AT1G09340.1;AT1G09340.2	AT1G09340.1	141	154	yes	no	2	8.6779e-35	209.85	1	1	1	1	1	1	368960000	321660000	340770000	363170000	414500000	361180000
EAFDVAYDNIYAFHLAQK	18	0	2114.01	AT5G63890.1;AT5G63890.2	AT5G63890.1	97	114	yes	no	2	0.0077152	82.362					1		0	0	0	0	12039000	0
EAFFNYR	7	0	945.434	AT2G34810.1;AT1G26380.1;AT1G26390.1;AT1G26420.1	AT2G34810.1	478	484	no	no	2	0.01225	126.68	1	1	1	1	1	1	71597000	89853000	64722000	67084000	67576000	67905000
EAFLNYR	7	0	911.45	AT1G30720.1;AT1G30730.1;AT1G34575.1;AT4G20800.1	AT1G30720.1	468	474	no	no	2	0.033366	110.23	1	1	1	1	1	1	0	110940000	107780000	87113000	73530000	144050000
EAFSLFDK	8	0	955.465	AT5G37780.1;AT1G66410.1;AT1G66410.2;AT5G37780.2;AT5G37780.3;AT5G21274.1;AT3G56800.1;AT3G43810.1;AT2G41110.1;AT2G27030.1;AT2G27030.3;AT3G43810.2;AT2G41110.2	AT5G37780.1	15	22	no	no	2	0.030799	99.799	1	1	1	1	1	1	252360000	343600000	220280000	282570000	205980000	237560000
EAFSLFDKDGDGCITTK	17	1	1902.87	AT5G37780.1;AT1G66410.1;AT5G21274.1;AT3G56800.1;AT3G43810.1;AT2G41110.1;AT2G27030.1;AT2G27030.3;AT3G43810.2	AT5G37780.1	15	31	no	no	2;3	7.2286e-61	241.27	2	1	2	2	2	1	763960000	384050000	381590000	475460000	506400000	255300000
EAGFLNAVDEVVR	13	0	1417.72	AT4G23100.1;AT4G23100.3	AT4G23100.1	480	492	yes	no	2	2.4295e-30	183.85	1	1	1		1	1	55887000	38289000	0	0	0	0
EAGIGLGLYLSPWDR	15	0	1645.85	AT2G28100.1	AT2G28100.1	142	156	yes	yes	2	0.0015201	135.1	1		1	1	1		4772800	0	7401400	9300500	10651000	0
EAGPLPGLGTK	11	0	1038.57	AT1G11840.4;AT1G11840.3;AT1G11840.2;AT1G11840.1;AT1G11840.6	AT1G11840.4	248	258	yes	no	2	0.041129	73.887	1	1	1	1	1	1	178890000	201770000	168020000	138560000	151090000	158120000
EAGSTMDVVAAQTK	14	0	1406.67	AT3G55440.1	AT3G55440.1	136	149	yes	yes	2	1.8438e-06	147.28	2	1	2	2	2	2	185980000	46673000	128070000	93003000	89515000	113900000
EAIGEVAYGASFIEYYAEEAK	21	0	2309.07	AT1G79440.1	AT1G79440.1	146	166	yes	yes	3	0.00037186	72.585	1			1		1	4083100	0	0	5181400	0	3380600
EAILVNCSR	9	0	1060.53	AT1G68010.1;AT1G68010.3	AT1G68010.1	265	273	yes	no	2	5.5439e-15	201.39	1	1	1	1	1	1	124250000	142480000	130220000	137710000	145470000	153770000
EAIWCGSTNSTTEEGK	16	0	1768.76	AT4G08870.1;AT4G08870.2	AT4G08870.1	93	108	yes	no	2	2.1913e-07	127.56		1	1			1	0	19648000	24379000	0	0	0
EALDAVPNCR	10	0	1143.53	AT4G37520.1;AT4G37520.2	AT4G37520.1	111	120	yes	no	2	0.0028829	125.31	1	1	1	1	1	1	62756000	59937000	55577000	60555000	69396000	58754000
EALDFYSR	8	0	999.466	AT4G12910.1	AT4G12910.1	483	490	yes	yes	2	2.0227e-07	187.55	1	1	1	1	1	1	225020000	292720000	206690000	156550000	150990000	169340000
EALDSNPR	8	0	900.43	AT1G69740.3;AT1G69740.2;AT1G69740.1	AT1G69740.3	309	316	yes	no	2	0.020661	107.59	1	1	1	1	1	1	22604000	19731000	13998000	13256000	15892000	0
EALHIEK	7	0	838.455	AT2G22990.6;AT2G22990.2;AT2G22990.4;AT2G22990.5;AT2G22990.1;AT2G22990.3	AT2G22990.6	194	200	yes	no	2	0.013111	125.25		1	1	1	1	1	0	41847000	0	30748000	34539000	26414000
EANLYSEIAEGISSYGVTR	19	0	2057.99	AT2G19940.3;AT2G19940.1	AT2G19940.3	233	251	yes	no	2;3	7.3465e-65	227.91	2	1	2	2	1	2	17989000	6082900	0	17321000	13224000	24617000
EAPEGSFILLHGCAHNPTGIDPTPEQWVK	29	0	3199.54	AT4G31990.4;AT4G31990.2;AT4G31990.1;AT4G31990.3	AT4G31990.4	214	242	yes	no	4	0.04624	21.317		1				1	0	11977000	0	0	0	30404000
EAQETCAGDPVSGECVAAWDEVEELSAAASHAR	33	0	3501.5	AT3G62410.1	AT3G62410.1	70	102	yes	yes	3;4	3.1156e-92	231.94	1	2	2	2	2	2	110890000	74758000	104580000	118600000	98935000	139220000
EASFGHGLLEIK	12	0	1299.68	AT2G27190.1	AT2G27190.1	417	428	yes	yes	2;3	4.6202e-20	164.66	2	1	1	1	1	1	45639000	32032000	27689000	22071000	18900000	21292000
EASLYGLGENSQANGIK	17	0	1749.85	AT1G68560.1	AT1G68560.1	174	190	yes	yes	2	0.00030661	83.617		1					0	19091000	0	0	0	0
EASYGHSTLDIK	12	0	1319.64	AT5G34850.1	AT5G34850.1	410	421	yes	yes	2;3	5.1058e-43	235.01	2	1	2	2	2	2	131670000	132440000	160530000	243040000	283010000	275940000
EATIQYVEVAK	11	0	1249.66	AT1G04420.1	AT1G04420.1	334	344	yes	yes	2	0.004139	105.4	1	1	1	1	1	1	15251000	18689000	15995000	24309000	21619000	18534000
EATPELLDFIR	11	0	1302.68	AT2G45790.1	AT2G45790.1	24	34	yes	yes	2	0.0054752	101.65		1	1	1	1	1	0	5544800	6000200	5784300	7858900	8070000
EAVAEYIAHPAHVEFATIFLGSLDK	25	0	2727.39	AT3G17210.2;AT3G17210.1	AT3G17210.2	72	96	yes	no	3;4	9.0901e-11	110.31	1		1		1	2	6606800	0	4715200	0	8544500	18272000
EAVAPYER	8	0	933.456	AT3G52880.1;AT3G52880.2	AT3G52880.1	40	47	yes	no	2	0.01413	116.37	1	1	1		1	1	0	26889000	22232000	0	0	35897000
EAVDANTLVR	10	0	1086.57	AT1G66250.1	AT1G66250.1	233	242	yes	yes	2	0.0052829	133.23		1	1	1	1	1	0	30071000	40068000	46703000	0	34936000
EAVDAVPNCR	10	0	1129.52	AT4G37530.1;AT4G37530.2	AT4G37530.1	111	120	yes	no	2	1.9859e-35	228.39	1	1	1	1	1	1	260080000	295980000	259110000	283160000	311970000	229380000
EAVFYYEECILR	12	0	1590.74	AT4G23170.1;AT4G23160.1;AT4G23160.3;AT4G23160.2;AT4G23150.1	AT4G23170.1	114	125	yes	no	2	4.3625e-34	261.98	1	1	1	1	1	1	1482700000	902180000	1417400000	2593400000	2094800000	2005900000
EAVLIGIALDDEK	13	0	1384.74	AT5G65620.2;AT5G65620.1	AT5G65620.2	244	256	yes	no	2	0.055102	62.408						1	0	0	0	0	0	26022000
EAVLIGIALDDEKR	14	1	1540.85	AT5G65620.2;AT5G65620.1	AT5G65620.2	244	257	yes	no	3	0.00045927	77.633	1	1	1	1	1	1	10302000	9849500	13317000	11267000	14511000	14599000
EAVNVSLANLLTYPFVR	17	0	1905.04	AT5G14740.9;AT5G14740.8;AT5G14740.7;AT5G14740.6;AT5G14740.2;AT5G14740.1;AT3G01500.4;AT3G01500.1;AT3G01500.3;AT3G01500.2	AT5G14740.9	206	222	no	no	2	3.7844e-152	372.71	1	1	1	1	1	1	56198000	52882000	70884000	59105000	58496000	59806000
EAYAPYER	8	0	997.451	AT1G63940.4;AT1G63940.1;AT1G63940.2;AT1G63940.3	AT1G63940.4	88	95	yes	no	2	0.057393	87.251			1	1		1	0	0	13718000	16971000	0	5496100
EAYQYFVLR	9	0	1187.6	AT1G65590.1	AT1G65590.1	354	362	yes	yes	2	0.0074151	143.94	1	1	1		1		17235000	22445000	17928000	0	0	0
EAYSHPAVK	9	0	1000.5	AT4G33810.5;AT4G33810.1;AT4G33810.4;AT4G33810.3;AT4G33810.2;AT4G33820.1	AT4G33810.5	418	426	no	no	2	0.0023936	134.3	1	1	1	1	1	1	173530000	178410000	138210000	110650000	118300000	119490000
EAYVNYR	7	0	913.429	AT5G44400.1	AT5G44400.1	475	481	yes	yes	2	0.019495	118.42	1	1	1	1	1	1	60425000	57279000	43675000	25954000	20131000	22792000
ECALLTDGR	9	0	1033.49	AT3G23940.2;AT3G23940.1	AT3G23940.2	511	519	yes	no	2	0.056512	80.438	1	1		1	1	1	22800000	19871000	0	23296000	21682000	18725000
ECDAEQIK	8	0	991.428	AT3G09410.3;AT3G09410.1	AT3G09410.3	333	340	yes	no	2	0.0079168	128.57	1	1	1	1	1	1	14196000	15802000	11768000	12839000	13126000	10694000
ECILSGLLSVDGLK	14	0	1502.8	AT2G44100.2;AT2G44100.1;AT5G09550.1	AT2G44100.2	16	29	yes	no	2	0.00032286	120.32	1		1	1	1	1	18092000	0	12970000	13810000	15640000	12139000
ECPSTVSCADIVALSAR	17	0	1834.86	AT2G37130.2;AT2G37130.1	AT2G37130.2	86	102	yes	no	2	6.0678e-09	148.68	1	1	1	1	1	1	36919000	27718000	0	59016000	65285000	60412000
EDAVALALK	9	0	928.523	AT3G19620.1	AT3G19620.1	309	317	yes	yes	2	0.0065031	123.69	1	1	1	1	1	1	474150000	621000000	463340000	601870000	554190000	572990000
EDDIYGTIVADNTVGVNHDHFVTFR	25	0	2833.33	AT1G31690.1	AT1G31690.1	449	473	yes	yes	3;4	2.6744e-49	207.17	2	2	2	2	2	2	212730000	198120000	229290000	204350000	174530000	175200000
EDDLNEIVQLVGK	13	0	1470.76	AT1G78900.2;AT1G78900.1	AT1G78900.2	489	501	yes	no	2	0.002558	90.15	1	1	1				46031000	47583000	26249000	0	0	0
EDDNIETIR	9	0	1103.51	AT5G26667.4;AT5G26667.3;AT5G26667.2;AT5G26667.1	AT5G26667.4	142	150	yes	no	2	0.017627	100.09	1		1		1	1	16486000	0	31986000	0	29455000	24136000
EDEAEGADILLVKPGLPYLDIIR	23	1	2538.36	AT1G69740.3;AT1G69740.2;AT1G69740.1	AT1G69740.3	339	361	yes	no	3	1.873e-09	119.34	1	1	1	1	1	1	15989000	12661000	18383000	23039000	20719000	15898000
EDEEGVAYQWR	11	0	1380.59	AT5G67130.1	AT5G67130.1	240	250	yes	yes	2	4.4206e-07	133.86	1				1	1	15206000	0	0	0	27813000	0
EDFDRVDLSLPGK	13	1	1489.74	AT1G78060.1	AT1G78060.1	498	510	yes	yes	2;3	4.2738e-05	118.51	2	2	2	2	2	2	229640000	244580000	211800000	317750000	321060000	288430000
EDFGGGHPDPNLTYAK	16	0	1716.77	AT1G23190.1;AT1G70730.1;AT1G70730.3;AT1G70730.2	AT1G23190.1	259	274	no	no	2;3	0.00031855	110.08	1	2	1	2	2	2	39451000	111410000	49772000	94353000	105380000	99087000
EDGIVSPVK	9	0	942.502	AT5G60360.2;AT3G45310.2;AT5G60360.1;AT3G45310.1;AT5G60360.3	AT5G60360.2	149	157	yes	no	2	0.0096842	111.17	1	1	1	1	1	1	171380000	265000000	189190000	195400000	184610000	201960000
EDGWSIQTALGEIVGR	16	0	1729.86	AT5G20500.1	AT5G20500.1	78	93	yes	yes	2	0.00208	80.69				1	1	1	0	0	0	15197000	9000100	8088600
EDIQHEADK	9	0	1083.48	AT4G26630.2;AT4G26630.1	AT4G26630.2	161	169	yes	no	2	5.0162e-38	207.68	1	1	1	1	1	1	27680000	30628000	0	26459000	26259000	25399000
EDISPCIFGSIEK	13	0	1493.71	AT2G27860.1;AT1G08200.1	AT2G27860.1	168	180	yes	no	2	0.00053175	104.82		1	1	1	1	1	0	14744000	15913000	11754000	14923000	20872000
EDKPQPPPEGR	11	1	1248.61	AT1G07890.6;AT1G07890.8;AT1G07890.7;AT1G07890.5;AT1G07890.4;AT1G07890.3;AT1G07890.2;AT1G07890.1	AT1G07890.6	120	130	yes	no	3	0.06281	56.02	1	1	1	1		1	20736000	21195000	21626000	9279900	0	8748300
EDLIAYLASGCK	12	0	1338.65	AT4G23100.1;AT4G23100.3;AT4G23100.2	AT4G23100.1	92	103	yes	no	2	0.00020494	140.49	1	1	1	1	1	1	0	8269400	7357200	20113000	17313000	15530000
EDLVFTIGVSDYK	13	0	1484.74	AT4G24430.1;AT4G24430.2	AT4G24430.1	496	508	yes	no	2	0.00025824	107.83			1	1		1	0	0	7578000	10670000	0	11430000
EDNIISEDHQR	11	0	1354.61	AT2G23600.2;AT2G23600.1	AT2G23600.2	227	237	yes	no	2;3	0.0004091	159.34	2	1	1	1	2	1	85559000	32596000	22644000	23863000	32419000	14190000
EDNLTQLVAQLSSN	14	0	1530.75	AT4G33090.1	AT4G33090.1	866	879	yes	yes	2	0.0039447	98.182					1	1	0	0	0	0	9028100	7747600
EDPEWLVIQR	10	0	1283.65	AT5G22860.1	AT5G22860.1	468	477	yes	yes	2	0.00064071	151.04	1	1	1		2	1	0	0	0	0	0	17033000
EDQVLIK	7	0	843.47	AT1G23740.1	AT1G23740.1	105	111	yes	yes	2	0.062523	91.906	1	1	1	1	1	1	78167000	121380000	100080000	89195000	91494000	86573000
EDSTDDIER	9	0	1078.44	AT5G04140.1;AT5G04140.2	AT5G04140.1	243	251	yes	no	2	0.00013561	149.65	1	1	1	1	1	1	133290000	207890000	124210000	173800000	163950000	194020000
EDVTVCK	7	0	849.39	AT5G09760.1;AT5G09760.2	AT5G09760.1	239	245	yes	no	2	0.065102	90.986	1	1	1	1	1	1	89100000	98363000	68639000	94279000	81059000	93954000
EEAEQLVVK	9	0	1043.55	AT4G31300.3;AT4G31300.1;AT4G31300.2	AT4G31300.3	162	170	yes	no	2	0.0019351	136.11	1	1	1	1	1	1	35518000	46525000	0	41532000	41242000	37897000
EEAVELALK	9	0	1000.54	AT3G22110.1	AT3G22110.1	186	194	yes	yes	2	0.0077879	119.27	1	1	1	1	1	1	34937000	32686000	32181000	36668000	34710000	27693000
EECTNQLIELSTCIPYVGGDAK	22	0	2496.15	AT1G55260.2;AT1G55260.1	AT1G55260.2	74	95	yes	no	2;3	1.6149e-55	218.78	1	2	1	1	1	2	18705000	28682000	19061000	16774000	14944000	47218000
EEEEVSPAADETEAK	15	0	1632.7	AT2G41740.2;AT2G41740.1	AT2G41740.2	885	899	yes	no	2	6.3365e-28	199.43	1	1	1	1	1		58564000	62020000	57667000	27153000	53167000	0
EEEIDQTPAGEPEK	14	0	1570.7	AT3G05900.1;AT3G05900.2	AT3G05900.1	56	69	yes	no	2	6.0608e-42	215.46	2	1	1	1	1	1	87318000	92177000	65381000	51067000	46040000	46994000
EEEIDQTPAGEPEKESPAVVEEVGAVVK	28	1	2964.45	AT3G05900.1;AT3G05900.2	AT3G05900.1	56	83	yes	no	3	2.6483e-08	91.389		1	1	1		1	0	29811000	28620000	17226000	0	17522000
EEFENDSGSSQVFWLLK	17	0	2013.93	AT3G01480.1	AT3G01480.1	362	378	yes	yes	2	3.538e-28	197.3	1	1	1	1	1	1	17603000	9929000	11860000	17877000	17984000	15660000
EEGGFEVIK	9	0	1006.5	AT5G35630.3;AT5G35630.2;AT5G35630.1	AT5G35630.3	317	325	yes	no	2	0.014755	92.439	1	1	1			1	0	60349000	55040000	0	0	28700000
EEIAQIEK	8	0	958.497	AT4G33010.1;AT4G33010.2	AT4G33010.1	951	958	yes	no	1;2	1.2653e-07	192.31	2	1	1	2	1	1	266680000	231600000	195100000	290790000	241720000	199100000
EEIFGPVAPLIR	12	0	1339.75	AT1G79440.1	AT1G79440.1	427	438	yes	yes	2	9.4318e-07	147.19	1	1	1	1	1	1	13878000	19003000	17204000	0	8442300	9856900
EEIIANLEK	9	0	1057.57	AT5G42980.1	AT5G42980.1	102	110	yes	yes	2	8.4043e-09	184.38	1	1	1	1	1	1	0	241080000	282560000	221410000	261620000	271510000
EEILAAPAPIVAETK	15	0	1550.86	AT1G22530.1;AT1G22530.2	AT1G22530.1	172	186	yes	no	2	0.010151	69.721	1		1				14400000	0	14999000	0	0	0
EEILTTSLK	9	0	1032.57	AT3G19170.1;AT3G19170.2	AT3G19170.1	1028	1036	yes	no	2	0.00056892	124.08		1	1				0	26007000	0	0	0	0
EEISQIEK	8	0	974.492	AT2G26080.1	AT2G26080.1	957	964	yes	yes	2	0.0022514	149.4	1		1	1	1	1	58330000	0	64720000	53016000	56485000	52621000
EEIVEETK	8	0	975.476	AT4G20260.9;AT4G20260.8;AT4G20260.7;AT4G20260.3;AT4G20260.2;AT4G20260.10;AT4G20260.1;AT4G20260.4	AT4G20260.9	166	173	yes	no	1;2	0.0016621	159.2	2	2	2	2	2	2	91000000	112390000	99537000	82409000	88358000	104870000
EELESTAQNLR	11	0	1288.63	AT2G34790.1	AT2G34790.1	63	73	yes	yes	2	3.5866e-36	271.19	1	1	1	1	1	1	825580000	823770000	617320000	524360000	591190000	402570000
EELIMNSFK	9	0	1109.54	AT5G63180.1;AT5G48900.1;AT4G24780.2;AT4G24780.1;AT1G67750.1	AT5G63180.1	163	171	no	no	2	0.0040743	113.26				1	1	1	0	0	0	11948000	0	0
EELIQAAVLLHPSFVNVDDIK	21	0	2349.26	AT3G23600.2;AT3G23600.1	AT3G23600.2	136	156	yes	no	3	1.6929e-19	167.16		1	1	1	1	1	0	5109000	10277000	19641000	18025000	0
EENLVVLPGIAFSQK	15	0	1642.89	AT4G23600.1;AT4G23600.2	AT4G23600.1	366	380	yes	no	2	9.4924e-13	169.23	1	1	1	1	1	1	75987000	57330000	75220000	136050000	144030000	143910000
EESDLTAALK	10	0	1075.54	AT5G16970.1	AT5G16970.1	210	219	yes	yes	2	0.026464	83.168	1	1	1	1	1	1	12738000	18627000	9202900	11873000	17922000	12328000
EESEIGR	7	0	818.377	AT4G12910.1;AT4G12910.2	AT4G12910.1	376	382	yes	no	2	0.00088046	153.88	1	1	1	1	1	2	413620000	460780000	392160000	377170000	353520000	1643700
EESPVEEAVSVVEEK	15	0	1658.79	AT1G22450.1	AT1G22450.1	54	68	yes	yes	2	0.0016689	100.04	1		1	1		1	11370000	0	10154000	16977000	0	6783700
EETEGDAAAPADVIEK	16	0	1643.75	AT3G05900.1;AT3G05900.2	AT3G05900.1	390	405	yes	no	2	9.1132e-06	117.27	1	1	1	1	1	1	36469000	53978000	43544000	0	31993000	0
EETGAQLGQR	10	0	1087.53	AT1G29660.1	AT1G29660.1	117	126	yes	yes	1;2	3.9336e-78	282.57	2	2	2	3	2	2	6601000000	8431500000	6352600000	10147000000	9798500000	8584700000
EEVAAPVSDEK	11	0	1172.56	AT1G72150.1	AT1G72150.1	38	48	yes	yes	2	7.4768e-05	140.17	1	1	1	1	1	1	55074000	81574000	66308000	32327000	29542000	48693000
EEVGEENFFLFGATADQVPR	20	0	2254.05	AT3G46970.1	AT3G46970.1	708	727	yes	yes	2;3	7.6217e-100	263.59			1	2	2	2	0	0	10017000	34311000	33517000	42506000
EEVGLSLDK	9	0	988.508	AT1G55490.5;AT1G55490.4;AT1G55490.3;AT1G55490.2;AT1G55490.1	AT1G55490.5	357	365	no	no	2	0.0099062	110.22	1				1		72263000	0	0	0	53587000	0
EEVSPQSTYCDSSDTQWPCFPNK	23	0	2761.13	AT1G02360.1;AT1G02360.2;AT1G02360.3	AT1G02360.1	116	138	yes	no	2;3	7.5003e-12	174.83		1		2	2	1	0	35459000	0	55810000	61325000	29367000
EEVVTIIIEDYVK	13	0	1548.83	AT1G49740.1	AT1G49740.1	167	179	yes	yes	2	2.3389e-13	169.65	1	1	1	1	1	1	25511000	0	19008000	17912000	16070000	12690000
EEWISNTVTAVMVPPHIDGSEIVR	24	0	2678.34	AT2G13360.3;AT2G13360.2;AT2G13360.1	AT2G13360.3	301	324	yes	no	3	1.7754e-06	92.95	1	1	1	1	1	1	47043000	19775000	34728000	44761000	39087000	49843000
EEYHLTAK	8	0	989.482	AT5G34940.2;AT5G34940.1;AT5G34940.4	AT5G34940.2	470	477	yes	no	2	1.9067e-08	199.07	1	1	1	1	1	1	24304000	38914000	35362000	38348000	36637000	40999000
EEYHLTPENGVLR	13	0	1555.76	AT5G07830.1	AT5G07830.1	477	489	yes	yes	2;3	0.0001475	109.42				2	2	1	0	0	0	47669000	18704000	20566000
EEYMSHFSIWALAK	14	0	1710.81	AT5G08370.2;AT5G08370.1	AT5G08370.2	233	246	yes	no	3	0.00016076	85.457	1				1	2	9165700	0	0	0	7663100	15330000
EFAIDSDAALDLPSKPK	17	1	1815.93	AT3G54660.1	AT3G54660.1	245	261	yes	yes	2;3	5.5936e-06	106.17	2	1	2	2	2	2	109160000	0	108120000	115730000	80812000	82199000
EFANQGVQPGELAVISK	17	0	1785.93	AT3G52880.1;AT3G52880.2	AT3G52880.1	23	39	yes	no	2	1.0455e-19	231.07	1	1	1	1	1	1	116050000	111080000	118670000	151580000	136450000	123450000
EFCVGVFGLSSK	12	0	1328.64	AT4G36195.1;AT4G36195.3;AT4G36195.2	AT4G36195.1	306	317	yes	no	2	8.5378e-06	139.43	1			1	1	1	13389000	0	0	30934000	27722000	33511000
EFDSSFAGFMTDGAK	15	0	1608.68	AT4G34180.1	AT4G34180.1	165	179	yes	yes	2	1.2325e-34	179.19	2	2	2	2	2	2	202020000	217660000	202140000	217310000	241440000	170170000
EFDTSYVGFMK	11	0	1322.59	AT4G35220.1	AT4G35220.1	182	192	yes	yes	2	0.033287	76.827						1	0	0	0	0	0	8876500
EFENLGR	7	0	863.414	AT1G55260.2;AT1G55260.1	AT1G55260.2	169	175	yes	no	2	0.0062422	146.21	1	1	1	1	1	1	189760000	204570000	176560000	183050000	164190000	169760000
EFFASNPDQVIIAK	14	0	1577.81	AT4G34260.1	AT4G34260.1	188	201	yes	yes	2	6.2278e-27	192.12	1	1	1	1	1	1	410360000	433330000	374710000	347160000	335530000	316140000
EFGAVCTPEFFLYK	14	0	1706.8	AT1G21350.2;AT1G21350.3;AT1G21350.5;AT1G21350.4;AT1G21350.1	AT1G21350.2	148	161	yes	no	2	1.4435e-12	161.67	1	1	1	1	1	1	31339000	22078000	23732000	42752000	32683000	37086000
EFGAVPR	7	0	774.402	AT2G15620.1	AT2G15620.1	573	579	yes	yes	2	0.04287	101.33	1	1	1	1		1	27965000	30840000	35371000	16855000	0	22623000
EFGCESK	7	0	855.343	AT3G04790.1	AT3G04790.1	201	207	yes	yes	2	0.048814	97.473	1	1	1	1	1	1	74915000	51801000	58457000	63420000	63120000	54995000
EFGITVEAVVDAAK	14	0	1447.76	AT3G60750.2;AT3G60750.1	AT3G60750.2	724	737	yes	no	2	2.9733e-05	112.94	1	1	1	1	1		8826100	6026700	0	0	0	0
EFLDISGNHVGVNINSMTSLVAEK	24	0	2573.28	AT3G16530.1	AT3G16530.1	152	175	yes	yes	2;3	0	444.65	4	3	4	4	4	4	901860000	346720000	927090000	765130000	854460000	897210000
EFPELGLK	8	0	931.501	AT4G20830.2;AT4G20830.1;AT1G11770.1;AT1G01980.1	AT4G20830.2	331	338	no	no	1;2	4.379e-11	203.19	2	2	2	2	2	2	639470000	877100000	700140000	1051300000	956550000	909280000
EFPELSLK	8	0	961.512	AT4G20840.1	AT4G20840.1	330	337	yes	yes	1	0.012772	159.04	1	1	1	1	1	1	22951000	17200000	15151000	39509000	43899000	33063000
EFPGTLLMNIYVVHPDGTGLR	21	0	2328.19	AT1G21670.1	AT1G21670.1	558	578	yes	yes	3	1.3913e-06	115.24	1	1	1	2	2	1	20146000	9518000	19814000	61230000	61826000	31322000
EFPYITATR	9	0	1096.56	AT3G26380.1;AT3G26380.2	AT3G26380.1	395	403	yes	no	2	0.00070496	121.74	2	1	1	1	1	1	0	113200000	0	92420000	102560000	89466000
EFQFYSGGVFDGR	13	0	1507.67	AT1G20850.1	AT1G20850.1	279	291	yes	yes	2	6.0865e-13	162.38	1	1	1	1	1	1	40540000	50594000	54141000	32706000	32704000	43249000
EFQVFLEK	8	0	1038.54	AT1G49740.1	AT1G49740.1	157	164	yes	yes	2	0.010458	122.19	1	1	1	1	1	1	258510000	285370000	264940000	225240000	217130000	339330000
EFSVMVDR	8	0	981.459	AT5G13980.1;AT5G13980.2;AT5G13980.3	AT5G13980.1	783	790	yes	no	2	0.012123	110.31	1	1	2	2	2	2	68254000	54725000	82890000	100650000	111510000	115050000
EFTAPPPPPAPVK	13	0	1346.72	AT1G22530.1;AT1G22530.2	AT1G22530.1	113	125	yes	no	2	0.0040159	78.934		1		1	1	1	0	63456000	0	0	0	23644000
EFTAPVTPVK	10	0	1087.59	AT1G72150.1	AT1G72150.1	112	121	yes	yes	2	0.0070841	108.81	1	1	1	1	1	1	102990000	127250000	102000000	68688000	55207000	77900000
EFTAPVTPVKEEK	13	1	1473.77	AT1G72150.1	AT1G72150.1	112	124	yes	yes	2	3.7254e-05	163.84	1	1	1	1	1	1	177960000	103010000	122030000	103320000	130120000	89217000
EFTFDVETGR	10	0	1199.55	AT3G07470.3;AT3G07470.2;AT3G07470.1	AT3G07470.3	51	60	yes	no	2	4.7458e-11	177.97	1	1	1		1		123860000	99486000	130850000	0	41069000	0
EFVAAATVPFHVDNK	15	0	1643.83	AT3G45010.1	AT3G45010.1	443	457	yes	yes	2;3	1.2329e-76	257.13	2	2	2	2	2	2	324950000	340470000	324550000	364820000	337410000	358920000
EFVECPYVPDK	11	0	1381.62	AT1G14210.1	AT1G14210.1	207	217	yes	yes	2	0.011909	89.913	1	1	1	1	1	1	87911000	126580000	76020000	85473000	111070000	87313000
EFVIVGGGNAAGYAAR	16	0	1550.78	AT1G63940.4;AT1G63940.1;AT1G63940.2;AT1G63940.3	AT1G63940.4	55	70	yes	no	2	1.7981e-08	157.38				1	1	1	0	0	0	25110000	24759000	26355000
EFVPEESVPYVGEALR	16	0	1819.9	AT2G40490.1	AT2G40490.1	161	176	yes	yes	2	1.41e-12	162.68	1	1	1	1	1	1	39221000	33829000	43379000	45439000	40577000	43554000
EFWFVTPPHVHPDASYK	17	0	2055.98	AT5G34850.1	AT5G34850.1	140	156	yes	yes	3	0.0001503	112.34		1	1			1	0	0	23219000	0	0	23080000
EFWVDCDQGYVSTTYR	16	0	2024.86	AT1G03230.1	AT1G03230.1	68	83	yes	yes	2	1.1563e-61	229.29		1	1			1	0	37652000	45774000	0	0	21850000
EFYVDFLEVLNRPEETGR	18	1	2212.08	AT5G18860.2;AT5G18860.1	AT5G18860.2	466	483	yes	no	3	3.1204e-14	140.02	1		1	1	1	1	13535000	0	10804000	10220000	9145000	5571800
EGAVADVK	8	0	787.408	AT5G43060.1	AT5G43060.1	147	154	yes	yes	2	0.046823	91.516	1	1	1	1	1	1	79851000	114080000	97897000	96805000	99171000	65819000
EGAVDLVHK	9	0	966.513	AT2G34810.1	AT2G34810.1	269	277	yes	yes	2	3.7559e-06	171.09	1	1	1	1	1	1	104060000	105650000	92240000	67181000	83412000	79658000
EGDEVYANVSEK	12	0	1338.59	AT1G23740.1	AT1G23740.1	160	171	yes	yes	2	2.4614e-21	198.25	1	1	1	1	1	1	84680000	107600000	106620000	79288000	93134000	97629000
EGDIEAVLK	9	0	972.513	AT2G20890.1	AT2G20890.1	177	185	yes	yes	2	0.058613	79.906	1	1	1				20284000	27063000	23190000	0	0	0
EGDLEVWAGPLSK	13	0	1399.7	AT5G08370.2;AT5G08370.1	AT5G08370.2	289	301	yes	no	2	1.165e-54	247.31	1	1	1	1	1	1	317570000	268040000	367800000	420530000	394620000	446900000
EGDQCAPQILHVEPNK	16	0	1833.87	AT5G21105.1;AT5G21105.3;AT5G21105.2	AT5G21105.1	233	248	yes	no	3	0.00083973	58.83	1	1	1	1	1	1	19283000	36256000	26861000	12116000	14351000	14922000
EGDVIVSFDDLHVGCEGTVPFR	22	0	2447.14	AT2G47940.2;AT2G47940.1	AT2G47940.2	363	384	yes	no	3	0.00010884	70.452				2	1	1	0	0	0	0	17921000	7660400
EGDYQLDSR	9	0	1081.47	AT1G63770.7;AT1G63770.4;AT1G63770.6;AT1G63770.5;AT1G63770.3;AT1G63770.2;AT1G63770.1	AT1G63770.7	73	81	yes	no	2	0.033679	89.542	1		1	1	1	1	25633000	0	29994000	16830000	23778000	20956000
EGEEACCGTGK	11	0	1196.44	AT1G53920.1	AT1G53920.1	306	316	yes	yes	2	7.289e-06	147.4	1	1	1	1	1	1	18281000	15906000	12185000	10076000	9547500	8169000
EGENPAVFTGDTLFVAGCGK	20	0	2067.96	AT3G10850.1	AT3G10850.1	125	144	yes	yes	2;3	2.9268e-24	239.61	2	2	2	1	1	1	109960000	88338000	100910000	92459000	80698000	90503000
EGEVYGR	7	0	808.372	AT4G20830.2;AT4G20830.1	AT4G20830.2	498	504	yes	no	2	0.0063716	160.69	1	1	1	1	1	1	380150000	446520000	337900000	515970000	617590000	423320000
EGFEGEISSK	10	0	1081.49	AT1G79210.3;AT1G79210.2;AT1G79210.1;AT1G16470.2;AT1G16470.1	AT1G79210.3	197	206	yes	no	2	0.00012407	143.7	1	1	1	1	1	1	49763000	51334000	48588000	37241000	40390000	44765000
EGGCNAIESYVFWNGHEPSPGK	22	0	2434.06	AT5G63810.1	AT5G63810.1	72	93	yes	yes	3	0.00075348	58.904	1	1	1			1	32059000	22327000	33784000	0	0	29632000
EGGIDVIQTYVFWNLHEPK	19	0	2244.12	AT5G63800.1	AT5G63800.1	72	90	yes	yes	2;3	7.4886e-30	149.74	2	1	2	2	2	2	57198000	29415000	57618000	113820000	119810000	100890000
EGGLDVIETYVFWNGHEPSPGQYYFGDR	28	0	3231.46	AT5G56870.1	AT5G56870.1	69	96	yes	yes	3	3.3651e-15	116.08			1	1	1	1	0	0	17369000	44100000	58362000	44279000
EGHEIICK	8	0	984.47	AT1G68290.1	AT1G68290.1	31	38	yes	yes	2	0.0016621	159.2	1	1	1	1	1	1	16366000	12461000	10076000	10953000	21465000	13784000
EGHQVTLFTR	10	0	1186.61	AT1G09340.1;AT1G09340.2	AT1G09340.1	76	85	yes	no	3	1.9744e-05	120.36	1	1	1	1	1	1	40029000	28958000	27968000	37576000	46181000	27602000
EGIEVAGENALETYGAK	17	0	1749.84	AT4G15210.4;AT4G15210.3;AT4G15210.1;AT4G15210.2	AT4G15210.4	323	339	yes	no	2	1.9332e-19	175.48	1	1		1	1	1	64551000	0	0	52041000	42546000	0
EGIPPDQQR	9	0	1038.51	AT2G35635.1;AT1G31340.1;AT2G36170.1;AT3G52590.1;AT4G05320.2;AT5G20620.1;AT4G05320.3;AT4G05320.6;AT4G05320.1;AT4G02890.3;AT1G65350.1;AT5G03240.1;AT5G03240.3;AT5G20620.2;AT5G03240.2;AT4G05320.5;AT4G05320.4;AT4G02890.4;AT3G62250.1;AT4G05320.8;AT4G05050.4;AT4G05320.7;AT1G23410.1;AT2G47110.1;AT5G37640.1;AT2G47110.2;AT4G02890.1;AT4G02890.2;AT4G05050.1;AT4G05050.2;AT4G05050.3;AT1G55060.1	AT2G35635.1	34	42	yes	no	2	0.045994	83.265	1	1	1	1	1	1	27231000	29838000	29252000	24659000	27099000	27952000
EGLEALKPELK	11	1	1225.69	AT1G53240.1	AT1G53240.1	319	329	yes	yes	2;3	6.4112e-10	178.54	2	2	2	2	2	2	224850000	267010000	207270000	233430000	235630000	183900000
EGLELLK	7	0	800.464	AT2G36530.1;AT2G36530.2	AT2G36530.1	227	233	yes	no	2	0.013643	124.37	1	1	1	1	1	1	90800000	113660000	94280000	68467000	69846000	74104000
EGLLQLVSDK	10	0	1100.61	AT1G07890.6;AT1G07890.8;AT1G07890.7;AT1G07890.5;AT1G07890.4;AT1G07890.3;AT1G07890.2;AT1G07890.1	AT1G07890.6	200	209	yes	no	2	1.4929e-19	200.86	1	1	1	1	1	1	44036000	52468000	51281000	29630000	33228000	17646000
EGLLVGISSGAAAAAALK	18	0	1597.9	AT5G28020.5;AT5G28020.6;AT5G28020.4;AT5G28020.3;AT5G28020.2;AT5G28020.1	AT5G28020.5	178	195	yes	no	2	0.0002741	125.82	1	1	1	1	1	1	19770000	19862000	21324000	21815000	27042000	28240000
EGLQVLGWR	9	0	1056.57	AT5G04140.1;AT5G04140.2	AT5G04140.1	205	213	yes	no	2	6.4859e-30	226.68	1	1	1	1	1	1	35339000	34964000	39700000	44302000	42197000	46955000
EGLTVFR	7	0	820.444	AT1G63770.7;AT1G63770.4;AT1G63770.6;AT1G63770.5;AT1G63770.3;AT1G63770.2;AT1G63770.1	AT1G63770.7	324	330	yes	no	2	0.010954	128.82	1			1		1	23130000	0	0	31135000	0	26706000
EGMATLAALNVLGR	14	0	1414.76	AT1G68010.1;AT1G68010.2	AT1G68010.1	330	343	yes	no	2	1.5229e-75	252.82	2	1	2	2	2	2	100140000	40857000	81613000	140800000	121430000	197670000
EGNAPAQEAASK	12	0	1171.55	AT3G48990.1	AT3G48990.1	112	123	yes	yes	2	7.5015e-09	157.38		1	1		1		0	0	0	0	22375000	0
EGNFDLVGNNFPVFFIR	17	0	1983.98	AT4G35090.2;AT4G35090.3;AT4G35090.1	AT4G35090.2	130	146	yes	no	2	6.2248e-09	148.18				1	1	1	0	0	0	0	17061000	9288900
EGNPAGCHVVIVDDLVQSGGTLIECQK	27	0	2894.39	AT2G42910.1	AT2G42910.1	236	262	yes	yes	3	3.6145e-08	83.312			1		1	1	0	0	14744000	0	0	18734000
EGPALPVLDEIVADEK	16	0	1693.88	AT4G34050.2;AT4G34050.1;AT4G34050.3	AT4G34050.2	38	53	yes	no	2	0.0016824	92.19	1	1	1	1	1	1	33014000	27029000	31151000	27989000	30599000	17754000
EGPDCELEK	9	0	1075.45	AT5G14780.3;AT5G14780.2;AT5G14780.1	AT5G14780.3	57	65	yes	no	2	0.00058987	123.72	1	1	1	1	1	1	16349000	11891000	16933000	25067000	0	21942000
EGQSIGVIPEGIDK	14	0	1440.75	AT5G66190.1;AT5G66190.2	AT5G66190.1	118	131	yes	no	2	0.0015793	118.77	1	1	1	1	1	1	735340000	508510000	314630000	548170000	535420000	399920000
EGQSVGVIADGIDK	14	0	1386.7	AT1G20020.1;AT1G20020.3;AT1G20020.2	AT1G20020.1	127	140	yes	no	2	1.9111e-08	155.99	1	1	1	1	1	1	449020000	533880000	490970000	554990000	552800000	495590000
EGQTEIAEAEK	11	0	1203.56	AT1G15340.2;AT1G15340.1	AT1G15340.2	129	139	yes	no	2	0.0011064	148.91	1	1	1	1	1	1	21025000	35589000	34058000	35237000	24309000	26782000
EGQVDAVVWNPWDK	14	0	1641.78	AT4G25900.1	AT4G25900.1	257	270	yes	yes	2	4.1969e-27	238.01	1	1	1	1	1	1	592570000	479360000	581120000	522270000	490440000	527400000
EGQVDAVVWNPWDKK	15	1	1769.87	AT4G25900.1	AT4G25900.1	257	271	yes	yes	2;3	8.2236e-26	188.15	2	2	2	2	2	2	110400000	76828000	84670000	125930000	129130000	99380000
EGSIVAMQGEALTTR	15	0	1561.78	AT5G11720.1	AT5G11720.1	746	760	yes	yes	2	1.639e-35	202.65	2	2	2	2	3	3	358830000	254330000	278040000	373870000	348680000	339970000
EGSTNPTFLYFAHGLK	16	0	1780.88	AT3G16640.1	AT3G16640.1	149	164	yes	yes	3	0.00099478	53.168	1	1	1		1	1	12588000	14469000	15948000	0	12128000	0
EGTEQYNFIEHCLASVDR	18	0	2166.96	AT1G13750.1	AT1G13750.1	430	447	yes	yes	3	0.009489	61.102		1				1	0	16062000	0	0	0	16986000
EGTGFVAVADLR	12	0	1233.64	AT1G12310.1;AT1G62820.1	AT1G12310.1	95	106	no	no	2	0.031513	72.006	1	1	1		1	1	12322000	16579000	17057000	0	11974000	11912000
EGTHINLK	8	0	910.487	AT3G45010.1	AT3G45010.1	252	259	yes	yes	2	2.056e-07	187.34	1	1	1	1	1	1	199730000	231690000	189620000	108820000	116020000	127230000
EGVAPINLIVENEFHR	16	0	1835.95	AT3G49680.2;AT3G49680.1	AT3G49680.2	232	247	yes	no	3	4.1005e-20	183.41	1	1	1	1	1	1	28311000	15715000	25444000	23593000	24143000	18570000
EGVENAGMVGFR	12	0	1264.59	AT3G23940.2;AT3G23940.1	AT3G23940.2	113	124	yes	no	2	0.026136	69.375						1	0	0	0	0	0	25055000
EGVFHLR	7	0	856.456	AT1G23310.1;AT1G70580.4;AT1G70580.3;AT1G70580.2;AT1G70580.1	AT1G23310.1	438	444	yes	no	2	0.0070777	136.08	1	1	1	1	1	1	127370000	133100000	134450000	195460000	131530000	168580000
EGVTEIAEAEKENNEGEK	18	1	1974.9	AT1G15340.2;AT1G15340.1	AT1G15340.2	94	111	yes	no	3	0.046309	45.347	1	1			1		17631000	27507000	0	0	23876000	0
EGVYEEYIVVPINK	14	0	1650.85	AT3G10720.2	AT3G10720.2	340	353	yes	yes	2	4.2384e-08	188.99	1	1	1	1	1	1	94589000	62848000	80568000	111550000	85477000	66662000
EHEDEIR	7	0	926.409	AT5G40450.2;AT5G40450.1	AT5G40450.2	1953	1959	yes	no	2	0.0097741	130.77	1	1	1	1			5381100	6143500	4135900	2799900	0	0
EHGNSPGYYDGR	12	0	1350.56	AT1G67090.1	AT1G67090.1	109	120	yes	yes	1;2;3	2.1283e-180	337.75	4	4	4	4	4	4	2539000000	5728700000	3840600000	4434500000	4802700000	4442400000
EHGNTPGYYDGR	12	0	1364.57	AT5G38420.1;AT5G38410.1;AT5G38410.3;AT5G38430.2;AT5G38430.1	AT5G38420.1	109	120	no	no	1;2;3	2.1283e-180	337.75	5	5	4	5	5	5	4240600000	11696000000	5840200000	6058700000	5623300000	5086000000
EHIDPIFK	8	0	997.523	AT1G51630.1;AT3G21190.1	AT1G51630.1	188	195	yes	no	2	0.0024666	147.52				1	1	1	0	0	0	35696000	41233000	25262000
EHISAYGEGNER	12	0	1360.6	AT1G66200.3;AT1G66200.1;AT5G35630.3;AT5G35630.2;AT5G35630.1	AT5G35630.3	337	348	no	no	2;3	7.909e-06	140.07	1	1	2	2	1	2	5759800	23356000	35816000	33114000	16084000	22139000
EHPQFVK	7	0	883.455	AT3G45010.1	AT3G45010.1	216	222	yes	yes	2	0.0042109	167.82	1	1	1	1	1	1	236280000	271200000	250110000	178050000	187240000	205180000
EHSNFVNCVR	10	0	1260.57	AT3G18060.1	AT3G18060.1	185	194	yes	yes	2;3	5.6747e-07	157.34	2	2	2	1	1	1	29917000	31587000	29566000	25622000	6980500	13474000
EHVEVEFIVGNIPIDDGIGK	20	0	2179.12	AT5G13980.1;AT5G13980.2;AT5G13980.3	AT5G13980.1	701	720	yes	no	2;3	1.4667e-181	314.84	2	2	2	2	2	2	395870000	123790000	332490000	338940000	353220000	263610000
EIAAMLAQFSHESGSFCYK	19	0	2174.98	AT2G43620.1;AT2G43610.1	AT2G43620.1	139	157	yes	no	3	8.8752e-05	117.65	1		1	1	1	1	10060000	0	6710800	16494000	17403000	21283000
EIAEAFLGSPVK	12	0	1259.68	AT3G12580.1	AT3G12580.1	133	144	yes	yes	2	0.05804	66.056						1	0	0	0	0	0	3226700000
EIAFDQHSR	9	0	1101.52	AT2G28000.1	AT2G28000.1	50	58	yes	yes	2;3	0.047119	78.113	1	1	1		1		10563000	13296000	8882900	0	0	0
EIAFEDPFSVDITK	14	0	1609.79	AT5G07360.2;AT5G07360.3;AT5G07360.1	AT5G07360.2	429	442	yes	no	2	1.2974e-05	142.07	1	1	1	1		1	59166000	48130000	54450000	59746000	0	69330000
EIAGVIIPSER	11	0	1182.66	AT2G45990.4;AT2G45990.3;AT2G45990.2;AT2G45990.1	AT2G45990.4	172	182	yes	no	2	0.022987	85.731	1			1	1	1	19981000	0	0	9753800	9940500	17297000
EIAYDSR	7	0	852.398	AT4G39640.2;AT4G39640.1	AT4G39640.2	93	99	yes	no	2	0.0065055	154.09	1	1	1	1	1	1	57141000	67754000	67978000	32371000	22344000	25149000
EIDDADKLVEAIK	13	1	1457.76	AT3G52880.1;AT3G52880.2	AT3G52880.1	147	159	yes	no	2;3	3.7778e-95	290.18	2	2	2	2	2	2	67435000	63007000	56385000	81599000	75187000	69312000
EIDEHLLAEE	10	0	1196.56	AT1G70890.1;AT1G70850.3;AT1G70850.1;AT1G70830.4;AT1G70830.1;AT1G70830.5;AT1G70830.3	AT1G70890.1	149	158	no	no	1;2	8.1664e-20	206.5	2	1	2	1	2	1	331980000	398540000	327130000	280610000	330890000	245540000
EIDTLVGIAR	10	0	1085.61	AT1G21880.2;AT1G21880.1	AT1G21880.2	182	191	yes	no	2	8.6385e-12	185.55	1	1	1	1	1	1	69351000	61430000	53376000	49337000	52543000	57784000
EIEGLPPSALGLFAQAAVSK	20	0	1997.08	AT5G65620.2;AT5G65620.1;AT5G10540.1	AT5G65620.2	294	313	yes	no	2;3	1.855e-06	119.37	2	2	2	2	2	2	13784000	14578000	14289000	20479000	28110000	24697000
EIEIDIEPTDTIDR	14	0	1657.8	AT2G35635.1;AT1G31340.1	AT2G35635.1	88	101	yes	no	2	3.5443e-25	172.34	1		1	1	1	1	33818000	0	0	61038000	64799000	0
EIEQEEGK	8	0	960.44	AT5G40450.2;AT5G40450.1	AT5G40450.2	2680	2687	yes	no	2	0.0033076	143.85	1		1		1	1	11769000	0	12020000	0	0	11387000
EIEYPGQVLR	10	0	1202.63	AT1G06680.1;AT1G06680.2	AT1G06680.1	116	125	yes	no	2	2.6756e-09	167.24	1	1	1	1	1	1	391480000	606910000	412720000	352770000	339700000	340090000
EIFNISGEK	9	0	1035.52	AT1G09340.1;AT1G09340.2	AT1G09340.1	269	277	yes	no	1;2	1.4651e-16	209.86	2	2	2	2	2	2	395400000	461210000	336010000	476870000	555520000	517440000
EIGCPYPCDK	10	0	1237.51	AT5G23870.4;AT5G23870.1;AT5G23870.2;AT5G23870.3	AT5G23870.4	387	396	yes	no	2	0.047297	76.345	1						258220000	0	0	0	0	0
EIIAVNQDPLGVQGR	15	0	1607.86	AT3G56310.1;AT3G56310.2	AT3G56310.1	328	342	yes	no	2	7.8859e-91	267.24	1	1	1	1	1		42618000	64675000	43296000	24296000	24736000	0
EIILTALK	8	0	899.569	AT1G11190.1	AT1G11190.1	190	197	yes	yes	2	0.057216	87.323			1		1	1	0	0	8957700	0	11807000	10340000
EIISSDSADVVNDKPASDSNPVVTK	25	1	2586.27	AT3G05900.1;AT3G05900.2	AT3G05900.1	31	55	yes	no	3	9.6439e-10	111.88	1	1		1	1	1	156100000	161250000	0	96018000	96474000	98198000
EILFEIVDR	9	0	1132.61	AT4G30530.1;AT4G30550.1	AT4G30530.1	198	206	yes	no	2	0.0014087	119.21	1		1	1	1	1	13780000	0	12259000	0	11868000	0
EILGLLYLR	9	0	1088.66	AT2G34930.1	AT2G34930.1	804	812	yes	yes	2	1.2299e-21	217.21	1		1	1	1	1	63896000	0	81006000	89294000	100730000	78021000
EILLNLLR	8	0	982.618	AT5G19220.1	AT5G19220.1	311	318	yes	yes	2	0.0018703	155.73	1	1	1	1	1	1	11841000	11733000	12135000	9911200	11596000	11481000
EINTLNDWETK	11	0	1361.65	AT2G24940.1	AT2G24940.1	77	87	yes	yes	2	1.0052e-33	200.6	1	1	1	1	1	1	0	84484000	56970000	36050000	33303000	26790000
EIPFTGILSDK	11	0	1218.65	AT1G57590.1	AT1G57590.1	149	159	yes	yes	2	0.02281	80.755		1			1	1	0	51169000	0	0	31516000	31516000
EIPVEEVK	8	0	941.507	AT4G20260.9;AT4G20260.8;AT4G20260.7;AT4G20260.3;AT4G20260.2;AT4G20260.10;AT4G20260.1;AT4G20260.4	AT4G20260.9	138	145	yes	no	2	0.02486	104.37	1	1	1	1	1	1	391000000	692560000	748240000	557800000	515520000	488070000
EIPVEEVKAEEPAK	14	1	1566.81	AT4G20260.9;AT4G20260.8;AT4G20260.7;AT4G20260.3;AT4G20260.2;AT4G20260.10;AT4G20260.1;AT4G20260.4	AT4G20260.9	138	151	yes	no	2;3	0.0002022	143	2	2	2	2	2		120060000	223640000	134250000	160760000	197260000	0
EIPVEEVKAEEPAKTEEPAK	20	2	2222.13	AT4G20260.9;AT4G20260.8;AT4G20260.7;AT4G20260.3;AT4G20260.2;AT4G20260.10;AT4G20260.1;AT4G20260.4	AT4G20260.9	138	157	yes	no	3;4	5.1094e-14	137.61	2	2	2	1	2	2	73242000	69337000	73936000	44256000	63248000	38234000
EISMPNGLLPLK	12	0	1310.73	AT1G09310.1	AT1G09310.1	31	42	yes	yes	2	0.013538	98.033	1	1	1			1	9001500	5484100	10106000	0	0	5211500
EISSDVYVFLTQDGTQR	17	0	1956.94	AT1G21670.1	AT1G21670.1	227	243	yes	yes	2;3	1.7337e-101	321.08	3	3	3	3	3	3	770740000	633560000	883940000	1309600000	1418800000	1276900000
EITFNFPTIDK	11	0	1323.67	ATCG00490.1	ATCG00490.1	464	474	yes	yes	2	0.00020265	134.23	1	1	1	1	1	1	34608000	34994000	41945000	32728000	35934000	35094000
EITFNFPTIDKLDGQE	16	1	1865.9	ATCG00490.1	ATCG00490.1	464	479	yes	yes	2	0.0045069	133.07	1		1	1		1	12415000	0	9753200	12884000	0	10366000
EIVIDFSTR	9	0	1078.57	AT1G31690.1	AT1G31690.1	101	109	yes	yes	2	5.5439e-15	201.39	1	1	1	1	1	1	242490000	216250000	329800000	207450000	197070000	176400000
EIVNSESVVVFSK	13	0	1435.76	AT5G40370.1	AT5G40370.1	8	20	yes	yes	2	7.6943e-05	141.88		1	1			1	0	24078000	22394000	0	0	12737000
EIYITGESYAGHYVPQLAK	19	0	2138.07	AT3G02110.1	AT3G02110.1	178	196	yes	yes	3	0.004034	54.805	1						8799900	0	0	0	0	0
EKLPGHHDEK	10	1	1188.59	AT1G20440.1	AT1G20440.1	192	201	yes	yes	3	0.017003	70.942	1	1	1	1	1	1	26943000	46858000	23789000	4817000	6302100	10883000
EKPISHMTVPPVK	13	1	1461.8	AT5G20230.1	AT5G20230.1	82	94	yes	yes	3	0.025225	65.043	1	1	1	1	1	1	24813000	30664000	29832000	29268000	17920000	30896000
EKPSIGTVIAVGPGSLDEEGK	21	1	2082.08	AT5G20720.4;AT5G20720.3;AT5G20720.2;AT5G20720.1	AT5G20720.4	190	210	yes	no	2;3	2.2746e-32	149.84	2	2	2			1	68410000	91789000	73087000	0	0	13225000
EKYETNPALYGELAK	15	1	1724.86	AT5G14740.9;AT5G14740.8;AT5G14740.7;AT5G14740.6;AT5G14740.2;AT5G14740.1;AT5G14740.5;AT5G14740.4;AT5G14740.3;AT3G01500.4;AT3G01500.1;AT3G01500.3;AT3G01500.2	AT5G14740.9	65	79	no	no	2;3	5.6978e-182	341.59	2	2	2	1	2	2	1184000000	1209500000	1083400000	437310000	1139400000	915830000
ELAEEHYK	8	0	1017.48	AT5G63310.1	AT5G63310.1	125	132	yes	yes	2	0.0024666	147.52	1	1	1	1	1	1	79065000	64640000	0	69533000	72974000	84681000
ELAQDLNFK	9	0	1076.55	AT5G42240.1	AT5G42240.1	397	405	yes	yes	1;2	1.0359e-05	164.72	2	1	2	2	2	2	173400000	198210000	182510000	194190000	184880000	165120000
ELDGIQVELQATDPTEMDLDVFK	23	0	2605.25	AT5G59880.2;AT5G59880.1	AT5G59880.2	98	120	yes	no	2	5.0132e-28	179.14	1						10765000	0	0	0	0	0
ELDLETAVAK	10	0	1087.58	AT4G34260.1	AT4G34260.1	166	175	yes	yes	1;2	1.2619e-34	230.24	2	2	2	2	2	2	296480000	278880000	260290000	232530000	235070000	203440000
ELDLVPTSSHLSLAR	15	0	1636.88	AT2G40300.1	AT2G40300.1	76	90	yes	yes	3	0.032686	45.864			1				0	0	22513000	0	0	0
ELDRPVLYSISPGTSVTPTMAK	22	1	2361.22	AT3G26380.1;AT3G26380.2	AT3G26380.1	247	268	yes	no	3	7.109e-14	111.45	1	2	2	2	2	2	24684000	77674000	79751000	67603000	97635000	132710000
ELDSSSEAVSGNSDK	15	0	1523.66	AT4G02510.4;AT4G02510.3;AT4G02510.2;AT4G02510.1	AT4G02510.4	50	64	yes	no	2	7.7061e-19	178.71	1	1	2	1	1	1	33850000	33240000	32994000	35155000	33350000	24871000
ELDYLVGAVANPK	13	0	1387.73	AT1G79550.2;AT1G79550.1	AT1G79550.2	179	191	yes	no	2	4.3284e-44	236.56	1	1	1	1	1	1	45191000	38537000	33768000	57685000	38555000	32228000
ELDYLVGAVSNPK	13	0	1403.73	AT3G12780.1	AT3G12780.1	254	266	no	no	2	1.4548e-41	198.62	1	1	1		1	1	0	0	92925000	0	98956000	0
ELELAGFQYLGGPDDGK	17	0	1807.86	AT5G36790.3;AT5G36790.2;AT5G36790.1;AT5G36700.4;AT5G36700.2;AT5G36700.1;AT5G36700.3	AT5G36790.3	177	193	yes	no	2	3.2593e-63	238.2	1	1	1	1	1	1	56814000	40963000	49487000	84128000	77099000	74339000
ELELAGFQYLGGPDDGKR	18	1	1963.96	AT5G36790.3;AT5G36790.2;AT5G36790.1;AT5G36700.4;AT5G36700.2;AT5G36700.1;AT5G36700.3	AT5G36790.3	177	194	yes	no	2;3	4.57e-259	368.89	2	1	2	2	2	2	160450000	101150000	162230000	265380000	253700000	229120000
ELESFASESGFLDE	14	0	1558.67	AT4G12060.1	AT4G12060.1	228	241	yes	yes	2	0.001563	94.692	1	1	1	1			9041300	10724000	14174000	5238300	0	0
ELESICNPIIAK	12	0	1385.72	AT5G02500.1;AT5G02500.2	AT5G02500.1	604	615	no	no	2	6.9356e-17	177.36	1	1	1	1	1	1	79686000	154450000	111800000	76661000	80991000	97294000
ELESLCNPIIAR	12	0	1413.73	AT3G12580.1	AT3G12580.1	604	615	yes	yes	2	7.7198e-13	200.54	1	1	1	1	1	1	70593000	72137000	56676000	0	63351000	68173000
ELESLLLPILEANK	14	0	1580.9	AT1G25230.2;AT1G25230.1;AT1G25230.3	AT1G25230.2	164	177	yes	no	2	2.8303e-34	202.03	1	1	1	1	1	1	32235000	20217000	23488000	27303000	27657000	20368000
ELETEVEVVK	10	0	1173.61	AT3G05900.1;AT3G05900.2	AT3G05900.1	260	269	yes	no	2	0.0083212	106.68	1	1	1	1	1	1	32228000	28314000	31238000	16106000	14839000	17042000
ELFETDSVYDSEK	13	0	1560.68	AT2G28000.1	AT2G28000.1	396	408	yes	yes	2	3.1938e-06	138.71	1	1	1			1	56802000	54403000	45767000	0	0	35005000
ELFPGTTTVK	10	0	1091.59	AT2G46930.1	AT2G46930.1	213	222	yes	yes	1;2	3.6448e-06	157.96	2	2	2	2	2	2	826660000	807750000	747030000	1155900000	1188600000	995760000
ELGCAQATCTK	11	0	1237.54	AT5G66590.1	AT5G66590.1	153	163	yes	yes	2	1.0532e-50	239.54		1		1	1	1	0	221080000	0	113400000	137800000	152580000
ELGGQADVDGFLVGGASLKPEFIDIIK	27	1	2787.47	AT3G55440.1	AT3G55440.1	220	246	yes	yes	3	5.5896e-11	97.063		1		1	1		0	54241000	0	195090000	214970000	0
ELGTVMR	7	0	804.416	AT5G37780.1;AT1G66410.1;AT1G66410.2;AT5G37780.2;AT5G37780.3;AT5G37780.4;AT5G21274.1;AT3G56800.1;AT3G43810.1;AT2G41110.1;AT2G27030.1;AT2G27030.3;AT3G43810.2;AT2G41110.2	AT5G37780.1	32	38	no	no	2	0.024885	114.02	2	2	2	2	2	2	230140000	215230000	215970000	117470000	123400000	171720000
ELGVPIVMHDYLTGGFTANTSLSHYCR	27	0	3037.44	ATCG00490.1	ATCG00490.1	259	285	yes	yes	3;4	1.4502e-44	189.09	3	2	3	2	2	2	122490000	85444000	174720000	85855000	79389000	134500000
ELHAAIK	7	0	780.449	AT5G63800.1	AT5G63800.1	340	346	yes	yes	2	0.0064768	155.73	1	1	1	1	1	1	689160000	639390000	518220000	837570000	985360000	678290000
ELHLFNSELK	10	0	1228.65	AT2G34930.1	AT2G34930.1	225	234	yes	yes	2;3	2.0107e-19	208.66	2	1	2	1	2	2	565410000	442630000	734620000	242210000	681890000	637050000
ELHLMGCVKK	10	1	1213.63	AT1G65010.1	AT1G65010.1	541	550	yes	yes	2	0.0026003	109.86		1	1	1			0	76693000	56957000	62362000	0	0
ELINSPANVLTPAVLAEEAAK	21	0	2149.16	AT2G24200.1;AT2G24200.2	AT2G24200.1	207	227	yes	no	2;3	1.757e-26	197.17	2	2	2	2	2	2	144170000	110450000	118310000	123300000	123070000	107880000
ELISNSSDALDK	12	0	1290.63	AT5G56030.1;AT5G56010.1;AT5G56000.1;AT5G52640.1	AT5G56030.1	34	45	yes	no	2	9.9652e-06	137.98	1		1	2	1		32674000	0	41267000	28641000	0	0
ELIVYPTGETMR	12	0	1407.71	AT3G14210.2;AT3G14210.1	AT3G14210.1	355	366	no	no	2	1.5391e-20	187.64	1	1	1	1	1	1	140040000	144780000	176060000	97101000	98025000	172930000
ELLDQNKGDEEK	12	1	1416.67	AT1G09070.1	AT1G09070.1	100	111	yes	yes	2	3.5825e-52	246.63	1	1					22391000	18805000	0	0	0	0
ELLGCSIADGSDK	13	0	1363.63	AT4G33090.1	AT4G33090.1	517	529	yes	yes	2	0.020412	69.721		1		1	1	1	0	19893000	0	19096000	0	18179000
ELLPESAEGDLSSLCLWADR	20	0	2260.07	AT1G68290.1	AT1G68290.1	54	73	yes	yes	2;3	1.6319e-15	132.05	2		2	2	1	2	7615500	0	3526700	19764000	4737700	16946000
ELLPLVQPEQKPK	13	1	1517.88	AT4G33220.1;AT4G33220.2	AT4G33220.1	149	161	yes	no	3	2.3589e-06	136.38	1	1	1	1	1	1	27987000	29973000	18266000	14857000	15610000	12947000
ELLPSSTK	8	0	873.481	AT3G62060.1;AT3G62060.2	AT3G62060.1	215	222	yes	no	2	0.017673	110.81		1	1	1	1	1	0	91020000	0	96231000	118070000	96848000
ELLQQLGAK	9	0	998.576	AT5G40370.1;AT5G40370.2	AT5G40370.1	31	39	yes	no	2	0.0082804	117.17	1	1	1	1	1	1	47316000	51542000	49790000	33723000	36719000	31425000
ELLQWPIEEIETLR	14	0	1767.94	AT1G55120.4;AT1G55120.2;AT1G55120.3;AT1G55120.1	AT1G55120.4	320	333	yes	no	2	1.4767e-27	217.83	1	1	1	1	1	1	19166000	9183200	15026000	18439000	11400000	14952000
ELLSAGHAVTILTVGDESSEK	21	0	2155.1	AT3G63140.1	AT3G63140.1	102	122	yes	yes	2;3	6.4579e-152	261.74			1	2	1	1	0	0	87967000	120940000	100660000	114990000
ELLSGEK	7	0	774.412	AT1G07890.6;AT1G07890.8;AT1G07890.7;AT1G07890.5;AT1G07890.4;AT1G07890.3;AT1G07890.2;AT1G07890.1	AT1G07890.6	193	199	yes	no	1	0.048794	151.29	1	1			1		8376000	9718300	0	0	5697900	0
ELLVGKDDELLETETR	16	1	1858.95	AT2G37660.1	AT2G37660.1	258	273	yes	yes	2;3	7.0516e-49	177.58	2	1	2	2	1	1	58121000	38994000	55069000	34638000	14440000	23505000
ELLVGKDDELLQTDTK	16	1	1815.95	AT5G02240.1	AT5G02240.1	186	201	yes	yes	2;3	2.4839e-19	142.32	2	1	2		1	1	110870000	28899000	130330000	0	36475000	39028000
ELQVTGPSGVAACK	14	0	1415.71	AT1G19320.1	AT1G19320.1	170	183	yes	yes	2	1.5908e-34	206.97	1	1	1	1	1	1	106590000	129120000	80784000	114760000	97262000	96432000
ELSGVASVELK	11	0	1130.62	AT5G13980.1;AT5G13980.2	AT5G13980.1	927	937	yes	no	2	0.020352	79.427	1	1	1		1	1	0	14044000	19358000	0	20326000	15849000
ELSISTFTR	9	0	1052.55	AT3G48460.1	AT3G48460.1	203	211	yes	yes	2	4.8167e-07	175.38	1	1	1	1	1	1	190430000	189580000	178580000	199720000	209770000	188870000
ELSLADR	7	0	802.418	AT4G35830.1;AT4G35830.2	AT4G35830.1	291	297	yes	no	2	0.056639	94.006	1		1	1	1	1	30715000	0	28904000	28881000	44329000	34813000
ELSLQVR	7	0	843.481	AT1G30720.1	AT1G30720.1	98	104	yes	yes	2	0.0069656	137.44	1	1	1	1	1	1	78884000	93380000	93799000	120260000	101900000	83235000
ELSNDFER	8	0	1008.45	AT1G35720.1	AT1G35720.1	68	75	yes	yes	2	0.0045246	138.55	1	1	1	1	1	1	77083000	76645000	64193000	63983000	54116000	58147000
ELSNGYIMVSANGGLNQQR	19	0	2049.99	AT1G29200.4;AT1G29200.1;AT1G29200.2	AT1G29200.4	68	86	yes	no	2	0.030052	48.948	1	1	1	1	1	1	71418000	85912000	65322000	144490000	94269000	127720000
ELSTACTK	8	0	908.427	AT2G46930.1	AT2G46930.1	258	265	yes	yes	2	0.0088285	126.28	1	1	1	1	1	1	409530000	334590000	341530000	474560000	501170000	451220000
ELTGGIYFGEPR	12	0	1337.66	AT1G31180.1;AT1G31180.2;AT5G14200.1;AT5G14200.3;AT5G14200.2;AT1G80560.1	AT5G14200.1	179	190	no	no	2	9.2607e-05	129.88	1		1	1	1	1	55997000	0	38804000	67105000	68439000	59786000
ELVHPIYTR	9	0	1126.61	AT3G08030.1;AT3G08030.2	AT3G08030.1	184	192	yes	no	2;3	3.0144e-30	233.47	2	2	2	2	2	2	2255700000	2718900000	2450500000	2533000000	3159400000	3058100000
ELVKDDAWLDGEFISTVQQR	20	1	2348.16	AT1G04410.1	AT1G04410.1	212	231	yes	yes	2;3	1.462e-115	273.49	2	1	1	2	1	2	125040000	77037000	95614000	100370000	70631000	112440000
ELVPLIVK	8	0	909.59	AT1G28670.1	AT1G28670.1	197	204	yes	yes	2	0.062081	85.359	1	1		1	1	1	11740000	21159000	0	13508000	10941000	13283000
ELVSTGSLESFR	12	0	1323.67	AT1G23205.1	AT1G23205.1	131	142	yes	yes	2	8.6894e-17	174.86	1	1	1	1	1	1	43823000	70774000	54231000	67221000	70193000	62230000
ELVTGFLK	8	0	905.522	AT5G20950.2;AT5G20950.1;AT5G20950.3	AT5G20950.2	286	293	yes	no	2	0.034763	94.662	1	1	1	1	1	1	36786000	44194000	35980000	0	0	21508000
ELWVDCDK	8	0	1063.46	AT1G03220.1	AT1G03220.1	67	74	yes	yes	1;2	6.4538e-35	241.03	2	2	2	2	2	2	821590000	892890000	807960000	825780000	881080000	831530000
ELYEVAEPYVSSNPR	15	0	1751.84	AT1G26380.1;AT1G26390.1	AT1G26390.1	452	466	no	no	2	5.79e-14	158.56				2	1	1	0	0	0	0	24322000	34864000
EMLENLFSEK	10	0	1238.59	AT3G52150.2;AT3G52150.1	AT3G52150.2	191	200	yes	no	2	0.019101	91.087	2		1			2	30118000	0	24129000	0	0	23381000
EMPVGGAALDLVGVPLPEETFTAAK	25	0	2511.29	AT5G14200.1;AT5G14200.3;AT5G14200.2	AT5G14200.1	84	108	yes	no	3	1.3391e-10	125.31					1	1	0	0	0	0	16631000	12135000
EMYSYMEQYVSK	12	0	1556.65	AT2G34790.1;AT1G30760.1;AT1G30760.2	AT2G34790.1	459	470	no	no	2	0.0054934	85.958	1	1	2				24233000	15746000	29085000	0	0	0
ENDQCAPQTLR	11	0	1330.59	AT5G21100.1	AT5G21100.1	216	226	yes	yes	2	4.3881e-36	231.38	1	1	1	1	1	1	242950000	269560000	252120000	245590000	217540000	268770000
ENEIRPFGNPR	11	1	1327.66	AT5G04140.1;AT5G04140.2	AT5G04140.1	366	376	yes	no	2;3	9.377e-46	250.96	2	2	2	2	2	2	212600000	138740000	197670000	250030000	215540000	242620000
ENETQESDVK	10	0	1177.51	AT1G15340.2;AT1G15340.1	AT1G15340.2	283	292	yes	no	2	0.0012862	131.5	1	1	1	1	1	1	9095600	15509000	10959000	10387000	9973900	8548100
ENIEDLPDKYDVVFDAIGMCDK	22	1	2585.17	AT1G23740.1	AT1G23740.1	282	303	yes	yes	3	1.3296e-12	128.38	2	2	2	2	1	2	61444000	30260000	56520000	24637000	19252000	33698000
ENLLSFEDLENLK	13	0	1562.78	AT1G30000.1;AT1G30000.2	AT1G30000.1	450	462	yes	no	2	6.4402e-06	166.11	1	1		1	1	1	18663000	16658000	0	21109000	19519000	13963000
ENLNIPSK	8	0	913.487	AT3G59010.1	AT3G59010.1	267	274	yes	yes	2	0.064217	84.498	1	1	1	1	1	1	25377000	28651000	25845000	25868000	16729000	17677000
ENPGCLFIATNR	12	0	1390.67	AT5G36790.3;AT5G36790.2;AT5G36790.1;AT5G36700.4;AT5G36700.2;AT5G36700.1;AT5G36700.3;AT5G47760.1;AT5G47760.2	AT5G36790.3	235	246	no	no	2;3	3.2124e-26	203.78	1	2	1	1	2	2	193440000	227500000	183190000	249840000	260200000	273880000
ENPTSPSQPCCTALQHADFACLCGYK	26	0	3011.27	AT5G48485.1	AT5G48485.1	47	72	yes	yes	3	1.154e-11	129.78	1	1		1	1	1	87682000	128420000	0	42829000	61430000	56074000
ENPTVNAAVILDGSPVTADFR	21	0	2185.1	AT2G38870.1	AT2G38870.1	29	49	yes	yes	2;3	1.6968e-83	298.79	2	2	2	2	2	2	127190000	101870000	127310000	199760000	205040000	204040000
ENSAEIEK	8	0	918.429	AT4G20830.2;AT4G20830.1	AT4G20830.2	446	453	yes	no	2	0.0091268	125.53	1	1	1	1	1	1	1005600000	1305900000	1089700000	1385200000	1195400000	1343500000
ENTNIIIDTFTSLGYDVYGGK	21	0	2319.13	AT4G33680.1	AT4G33680.1	375	395	yes	yes	2;3	3.3115e-43	262.66	2	2	2	2	2	2	11181000	10151000	20677000	22179000	21769000	24362000
ENVEVAK	7	0	787.408	AT3G14310.1	AT3G14310.1	321	327	yes	yes	2	0.028546	111.04	1		1	1	1	1	41073000	0	33967000	17678000	21641000	11365000
ENVQAYLPNTK	11	0	1275.65	AT5G42100.2;AT5G42100.1	AT5G42100.2	100	110	yes	no	2	0.045305	72.321	1	1	1	1	1		14258000	19806000	14983000	17295000	15979000	0
EPETTTTAPVAEPPK	15	0	1566.78	AT4G20260.9;AT4G20260.8;AT4G20260.7;AT4G20260.3;AT4G20260.2;AT4G20260.10;AT4G20260.1;AT4G20260.4;AT4G20260.6	AT4G20260.9	210	224	yes	no	2	0.00064739	120.57	1	1	1	1	1	1	52138000	88871000	59046000	62181000	61974000	66012000
EPETTTTAPVAEPPKP	16	1	1663.83	AT4G20260.9;AT4G20260.8;AT4G20260.7;AT4G20260.3;AT4G20260.2;AT4G20260.10;AT4G20260.1;AT4G20260.4;AT4G20260.6	AT4G20260.9	210	225	yes	no	2	0.011589	104.59	1		1	1		1	15293000	0	20000000	31761000	0	28166000
EPFNAEPPR	9	0	1055.5	AT3G01910.1	AT3G01910.1	26	34	yes	yes	2	0.0095017	111.95	1	1	1	1	1	1	18454000	27235000	17776000	24405000	27269000	17466000
EPFVELLK	8	0	973.548	AT3G19170.1;AT3G19170.2;AT1G49630.5;AT1G49630.3;AT1G49630.2;AT1G49630.1	AT3G19170.1	179	186	yes	no	2	0.051195	89.752	1	1	1	1	1	1	18533000	19280000	22594000	23705000	26207000	19157000
EPIAVVPILR	10	0	1105.69	AT3G53900.1;AT3G53900.2	AT3G53900.1	84	93	yes	no	2	0.0017643	129.65	1	1	1	1	1	1	16436000	13742000	12597000	13511000	11128000	22838000
EPIFNPSK	8	0	930.481	AT5G10770.1	AT5G10770.1	172	179	yes	yes	2	0.0074719	129.68	1	1	1	1	1	1	140730000	167340000	157050000	179700000	189720000	143130000
EPIHMGQR	8	0	966.471	AT2G28100.1	AT2G28100.1	409	416	yes	yes	2	0.011404	120.52	1				1	1	33390000	0	0	0	23636000	0
EPIPVEGLEGLWER	14	0	1622.83	AT2G34790.1	AT2G34790.1	386	399	yes	yes	2;3	1.5908e-34	206.97	2	2	2	2	2	1	344390000	222250000	255220000	203030000	177880000	151330000
EPIPVTQLVR	10	0	1150.67	AT1G79210.3;AT1G79210.2;AT1G79210.1;AT1G16470.2;AT1G16470.1	AT1G79210.3	103	112	yes	no	2	0.0014002	131.06	1	1	1		1	1	41713000	41405000	42863000	0	40515000	31002000
EPLFCESDR	9	0	1151.49	AT2G27920.1;AT2G27920.2;AT2G27920.3	AT2G27920.1	408	416	yes	no	2	3.1389e-07	201.39	1	1	1	1	1	1	454100000	517430000	397420000	444140000	456990000	396610000
EPLSADILGYR	11	0	1232.64	AT4G39640.2;AT4G39640.1	AT4G39640.2	254	264	yes	no	2	7.6863e-12	182.29	1	1	1	1	1	1	39343000	55232000	40994000	21255000	27531000	20017000
EPTFIPVVVGLLDSSGK	17	0	1756.96	AT1G63770.7;AT1G63770.4;AT1G63770.6;AT1G63770.5;AT1G63770.3;AT1G63770.2;AT1G63770.1	AT1G63770.7	483	499	yes	no	2;3	6.2913e-09	135.81	2	2	2	2	2	1	139020000	92210000	103750000	111780000	154080000	79036000
EPYATIDNADTYNSNLIK	18	0	2040.96	AT1G11820.1;AT1G11820.3;AT1G11820.2	AT1G11820.1	295	312	yes	no	2	9.5297e-12	200.21	1	1			1	1	23429000	0	0	0	0	46970000
EQEVGEFDPPSEVR	14	0	1616.73	AT5G49650.1	AT5G49650.1	412	425	yes	yes	2	0.00046923	112.13				1		1	0	0	0	14289000	0	15971000
EQIFSTYSDNQPGVLIQVYEGER	23	0	2671.28	AT3G12580.1	AT3G12580.1	431	453	yes	yes	3	5.5072e-09	105.51				1	1	1	0	0	0	16291000	12045000	21530000
EQLALAADVPLTAESK	16	0	1654.88	AT4G25050.1;AT4G25050.2	AT4G25050.1	65	80	yes	no	2	3.5171e-49	222.94	1	1	1	1	1	1	195910000	148950000	177150000	124260000	141080000	121040000
EQLPPGILGPIK	12	0	1260.74	AT5G57700.5;AT5G57700.2;AT5G57700.4;AT5G57700.1;AT5G57700.3	AT5G57700.5	123	134	yes	no	2	0.003232	96.331	1	1	1	1	1	1	23901000	19442000	15167000	18081000	23082000	15859000
EQLTQLVEFAK	11	0	1304.7	AT4G33680.1	AT4G33680.1	253	263	yes	yes	2	3.9831e-21	212.21	1	1	1	1	1	1	99418000	78719000	116770000	141630000	162530000	135380000
EQVFSTYSDNQPGVLIQVYEGER	23	0	2657.26	AT5G02500.1	AT5G02500.1	431	453	no	no	3	0.00019434	69.72		1	1			1	0	13212000	11698000	0	0	21563000
ESAGQETVK	9	0	947.456	AT3G51260.1;AT3G51260.2	AT3G51260.1	180	188	yes	no	2	0.0038762	118.74	1	1	1	1	1	1	0	16792000	14394000	17471000	0	13369000
ESAIAQVAR	9	0	943.509	AT5G11420.1	AT5G11420.1	262	270	yes	yes	2	4.9517e-11	198.73	1	1	1	1	1	1	1283800000	1647800000	1506300000	965310000	1037000000	1012300000
ESAIAQVIR	9	0	985.556	AT3G08030.1;AT3G08030.2	AT3G08030.1	263	271	yes	no	2	6.4359e-22	221.56	1	1	1	1	1	1	2579100000	3552700000	2825100000	4340500000	4243300000	4557200000
ESAIAQVVR	9	0	971.54	AT5G25460.1	AT5G25460.1	265	273	yes	yes	1;2	1.127e-20	215.39	2	2	2	2	2	2	1122900000	1315300000	1265900000	778240000	675920000	670160000
ESASDAHPYDIQQLAR	16	0	1799.84	AT4G18970.1;AT4G18970.2	AT4G18970.1	345	360	yes	no	2;3	1.4323e-73	281.25	2	2	2	2	2	2	261820000	298230000	234690000	115550000	93968000	106780000
ESDAVLLGAIGGYK	14	0	1391.73	AT1G80560.1	AT1G80560.1	105	118	yes	yes	2	0.00019425	123.79	1	2	1	1	1	1	10306000	16118000	0	12048000	0	8474800
ESELIEENVLGVR	13	0	1485.77	AT5G16440.1	AT5G16440.1	153	165	yes	yes	2	4.4359e-09	185.14		1	1	1	1	1	0	49159000	52692000	47736000	51728000	52047000
ESELIQDNALGVR	13	0	1442.74	AT3G02780.2;AT3G02780.1	AT3G02780.2	99	111	yes	no	2	6.6809e-05	119.16		2					0	41057000	0	0	0	0
ESELTPSNSNILDGR	15	0	1630.78	AT3G01480.1	AT3G01480.1	379	393	yes	yes	2	9.359e-44	224.42	1	1	1	1	1	1	59624000	86603000	79152000	71686000	87811000	76354000
ESESVLLGAAILGAVAGK	18	0	1683.94	AT4G30310.3;AT4G30310.4;AT4G30310.2	AT4G30310.3	377	394	yes	no	2	1.1118e-15	157.03				1	1	1	0	0	0	0	8188500	9685700
ESGDIDNPK	9	0	973.435	AT1G72990.3;AT1G72990.4;AT1G72990.1;AT1G72990.2	AT1G72990.3	322	330	yes	no	2	0.0082266	117.4	1	1	1	1	1	1	15887000	17265000	14766000	16403000	18006000	17638000
ESGVVWLK	8	0	916.502	AT1G09310.1	AT1G09310.1	52	59	yes	yes	1;2	0.033656	114.78	2	2	1	1		1	77368000	93703000	70370000	33586000	0	48935000
ESIGFTPWVECNR	13	0	1593.72	AT2G02990.1	AT2G02990.1	176	188	yes	yes	2	2.098e-06	141.95	1	1	1	1	1	1	186960000	86232000	146820000	113670000	99211000	105280000
ESNTGSESNTNSSPQK	16	0	1665.71	AT1G52000.2;AT1G52000.1	AT1G52000.2	417	432	yes	no	2	0.0010397	140.91	1		1	1	1		4977900	0	3577000	7446900	5010700	0
ESPANNPGLSTNR	13	0	1355.64	AT1G08110.3;AT1G08110.2;AT1G08110.1;AT1G08110.4	AT1G08110.3	7	19	yes	no	2	1.844e-06	142.71	1	1	1	1	1	1	87587000	134020000	99509000	88617000	94356000	107200000
ESPEVQNVGSEYGLVIPK	18	0	1943.98	AT2G37720.1	AT2G37720.1	237	254	yes	yes	2	6.7661e-14	169.04	1	1	1	1	1	1	58735000	56057000	56509000	68740000	92537000	81705000
ESQEALSPLVDLALK	15	0	1611.87	AT1G23190.1	AT1G23190.1	552	566	yes	yes	2;3	1.2389e-12	167.71	1	1	1	1	1	2	76268000	56145000	58936000	75056000	60125000	61329000
ESQSVGAAGELYK	13	0	1337.65	AT2G30200.2;AT2G30200.1	AT2G30200.2	107	119	yes	no	2	0.0066534	80.763	1	1	1	1	1	1	36094000	39960000	33230000	32440000	30398000	36428000
ESSDITR	7	0	806.377	AT2G32090.1	AT2G32090.1	10	16	yes	yes	2	0.060365	92.677	1	1	1	1	1	1	8375700	10078000	7504600	5145500	5803100	5117900
ESSSEHETQVSNIR	14	0	1601.73	AT5G66090.1	AT5G66090.1	128	141	yes	yes	3	9.2978e-14	134.04	1	1	1	1	1	1	25535000	0	29312000	47204000	43347000	37903000
ESTILYAVDIRGR	13	1	1491.8	AT1G65450.3;AT1G65450.1	AT1G65450.3	136	148	yes	no	3	0.00099823	69.815	1	1	1	1	1		6758500	17420000	10850000	31160000	24222000	0
ESTLGFVDLLR	11	0	1248.67	ATCG00490.1	ATCG00490.1	340	350	yes	yes	1;2	1.2357e-220	370.84	15	10	9	12	21	12	42032000000	48527000000	40170000000	44406000000	46846000000	37974000000
ESTLGFVDLLRDDYVEK	17	1	1997.99	ATCG00490.1	ATCG00490.1	340	356	yes	yes	2;3	6.455e-61	232.8	4	2	5	4	3	5	100400000	50906000	95731000	91604000	118740000	118950000
ESTLGFVDLLRDDYVEKDR	19	2	2269.12	ATCG00490.1	ATCG00490.1	340	358	yes	yes	3	5.1507e-06	115.57	1		1	1	1	1	19114000	0	18186000	58114000	57328000	27832000
ESTLHLVLR	9	0	1066.61	AT2G35635.1;AT1G31340.1;AT2G36170.1;AT3G52590.1;AT4G05320.2;AT5G20620.1;AT4G05320.3;AT4G05320.6;AT4G05320.1;AT4G02890.3;AT1G65350.1;AT5G03240.1;AT5G03240.3;AT5G20620.2;AT5G03240.2;AT4G05320.5;AT4G05320.4;AT4G02890.4;AT3G62250.1;AT4G05320.8;AT4G05050.4;AT4G05320.7;AT1G23410.1;AT2G47110.1;AT5G37640.1;AT2G47110.2;AT4G02890.1;AT4G02890.2;AT4G05050.1;AT4G05050.2;AT4G05050.3;AT1G55060.1;AT3G09790.1;AT3…	AT2G35635.1	64	72	yes	no	2	6.4859e-30	226.68	1	1	1	1	1	1	69378000	66837000	68243000	53965000	63022000	46919000
ESVLPSDVSAR	11	0	1158.59	AT3G60750.2;AT3G60750.1;AT2G45290.2;AT2G45290.1	AT3G60750.2	675	685	yes	no	2	0.0011978	123.63	1	1	1	1	1	1	50674000	46199000	55813000	41731000	53737000	44857000
ESVNLTNLK	9	0	1016.55	AT5G19240.1	AT5G19240.1	42	50	yes	yes	2	3.2047e-05	159.46	1	1	1	1	1	1	68254000	94299000	73435000	86100000	97094000	118510000
ESYDPMGLFSSEWTDQILGIK	21	0	2415.13	AT2G46760.1	AT2G46760.1	525	545	yes	yes	2	0.00036309	81.448	1					1	8970100	0	0	0	0	6726100
ETADALVTTGLSK	13	0	1304.68	AT5G08380.1;AT5G08380.2	AT5G08380.1	75	87	yes	no	2;3	1.4337e-54	246.14	2	1	2	2	2	1	2092300000	1974900000	1831100000	2307800000	2392600000	2429400000
ETALLYDEQHSAASNK	16	0	1775.83	AT4G33090.1	AT4G33090.1	283	298	yes	yes	2;3	6.3759e-19	175.74	1		1	1	2	2	19021000	0	19393000	28285000	44469000	28340000
ETAPVLDYLENALYK	15	0	1737.88	AT5G02790.1	AT5G02790.1	145	159	yes	yes	2	3.2888e-05	140.39	1	1	1	1	1	2	25144000	21250000	26485000	24347000	22592000	24471000
ETCADDPVSGECVAAWDEVEELSAAASHAR	30	0	3231.37	AT2G47400.1	AT2G47400.1	66	95	yes	yes	3;4	3.9179e-134	267.83	2	2	2	2	2	2	254070000	145230000	187180000	183820000	153260000	190410000
ETCYLLQGK	9	0	1110.54	AT4G10300.1	AT4G10300.1	83	91	yes	yes	2	6.6915e-16	211.87	1	1	1	1	1	1	97491000	132090000	98644000	172090000	155380000	161190000
ETDITEADHK	10	0	1157.52	AT4G26630.2;AT4G26630.1	AT4G26630.2	147	156	yes	no	2	3.5279e-09	189.7	1	1	1	1	1	1	27157000	31565000	30386000	0	32730000	26447000
ETDLSQEK	8	0	948.44	AT4G33090.1	AT4G33090.1	734	741	yes	yes	2	0.00047911	170.87	1	1	1	1	1	1	22557000	18662000	20857000	18776000	20851000	17781000
ETDTESVEK	9	0	1036.46	AT3G05900.1;AT3G05900.2	AT3G05900.1	577	585	yes	no	2	0.0025614	133.86	1	1	1	1	1	1	54009000	60987000	44976000	38491000	34941000	32468000
ETEALDFDLTYYR	13	0	1634.75	AT2G46760.1	AT2G46760.1	456	468	yes	yes	2	5.4489e-67	255.39	1	1	1		1	1	79916000	69777000	76960000	0	71666000	68990000
ETEASFTTSTK	11	0	1200.55	AT4G09670.1	AT4G09670.1	271	281	yes	yes	2	0.00061343	129.85	1	1	1	1	1	1	26291000	22586000	25537000	14678000	21548000	24266000
ETFEDADER	9	0	1110.45	AT2G28000.1	AT2G28000.1	475	483	yes	yes	2	0.00027543	147.29	1	1	1	1	1	1	59162000	65370000	62345000	34804000	32348000	30761000
ETGAPITETR	10	0	1073.54	AT5G11670.1	AT5G11670.1	354	363	yes	yes	2	0.01207	100.25	1	1	1	1	1	1	58576000	74312000	62931000	52868000	46281000	40992000
ETGHIQILR	9	0	1065.59	AT3G23940.2;AT3G23940.1	AT3G23940.2	423	431	yes	no	2	0.00070813	144.38	1		1	1	1	1	16150000	0	17428000	17116000	11833000	15239000
ETHEAIAIAMNR	12	0	1354.67	AT5G04140.1;AT5G04140.2	AT5G04140.1	984	995	yes	no	2;3	6.3311e-17	178.22	2	2	3	1	2	2	55755000	29153000	47027000	41892000	55844000	25713000
ETILVEGLK	9	0	1000.58	AT4G35220.1	AT4G35220.1	232	240	yes	yes	2	0.004567	128.69	1	1	1	1	1	1	67465000	67114000	57346000	83702000	88784000	94653000
ETIPAFPGTSLK	12	0	1259.68	AT5G63800.1	AT5G63800.1	448	459	yes	yes	2	0.00069865	109.79	1	1	1	1	1		2436300000	2607600000	2347300000	3423600000	3410000000	0
ETIVNELR	8	0	972.524	AT3G49120.1	AT3G49120.1	50	57	yes	yes	2	0.00035159	172.03	1	1	1	1	1	1	491560000	806430000	530520000	469090000	513480000	524700000
ETLIAGGPFVLPLANK	16	0	1638.93	AT5G62790.1;AT5G62790.2	AT5G62790.1	205	220	yes	no	2	0.00095141	141.88	1	1	1	1	1	1	13326000	16180000	13448000	16611000	14371000	13240000
ETLQGETLK	9	0	1017.53	AT5G42790.1;AT1G47250.1	AT5G42790.1	197	205	yes	no	2	0.0036152	114.28	1	1	1	1	1	1	0	54778000	44994000	54175000	0	38299000
ETMEIVANK	9	0	1033.51	AT5G08380.1;AT5G08380.2	AT5G08380.1	301	309	yes	no	1;2	3.4719e-24	225.4	3	3	3	3	3	3	568500000	605100000	578800000	531640000	607590000	596960000
ETMPNIQQVFVK	12	0	1432.74	AT5G04140.1;AT5G04140.2	AT5G04140.1	228	239	yes	no	2	1.3107e-06	146.81	1	1	1	1	1	1	34835000	31788000	39204000	30484000	20563000	41764000
ETPDFNLCVSLLNSDPR	17	0	1975.93	AT1G47960.2;AT1G47960.1	AT1G47960.2	32	48	yes	no	2	1.3483e-62	234.49	1	1	1	1	1	1	167210000	84179000	179680000	240690000	280940000	201480000
ETPSVAGIINPGSEGFQK	18	0	1829.92	AT5G49460.2;AT5G49460.1;AT3G06650.2;AT3G06650.1	AT5G49460.2	36	53	yes	no	2	0.00014685	87.831				1	1	1	0	0	0	0	24695000	21485000
ETSADEETSQEEK	13	0	1481.6	AT2G35410.1	AT2G35410.1	72	84	yes	yes	2	6.6524e-55	249.5	1	1	1	1	1	1	46955000	62797000	60693000	50132000	55726000	35274000
ETSLSGNQEK	10	0	1091.51	AT3G26720.1	AT3G26720.1	947	956	yes	yes	2	1.0456e-15	199.7	1	1	1	1	1	1	600520000	552130000	533800000	461950000	454540000	525370000
ETSTIVGDGSTQDAVK	16	0	1606.77	AT1G55490.5;AT1G55490.4;AT1G55490.3;AT1G55490.2;AT1G55490.1	AT1G55490.5	382	397	yes	no	2	1.0722e-05	144.92	1	1	1	1	1	1	76880000	79348000	78148000	57610000	56163000	55452000
ETTEIAEGK	9	0	976.471	AT3G55800.1	AT3G55800.1	251	259	yes	yes	2	0.004567	128.69	1	1	1	1	1	1	555250000	470210000	571380000	667920000	790770000	509300000
ETVGPWEER	9	0	1101.51	AT3G10740.3;AT3G10740.1;AT3G10740.4;AT3G10740.2	AT3G10740.3	284	292	yes	no	2	0.0095813	124.98	1	1	1	1	1	1	116020000	0	83374000	51474000	78392000	58425000
ETVGPWEERPGHFGDVWK	18	1	2125	AT3G10740.3;AT3G10740.1;AT3G10740.4;AT3G10740.2	AT3G10740.3	284	301	yes	no	2;3;4	2.4556e-93	319.28	3	3	3	3	3	3	2056100000	1556400000	2011300000	1767200000	1590700000	1684000000
ETVINLR	7	0	843.481	AT5G14450.1	AT5G14450.1	274	280	yes	yes	2	0.029531	110.23	1	1	1	1	1	1	29973000	35676000	27178000	24091000	21389000	23401000
ETVVGAAK	8	0	773.428	AT5G42980.1	AT5G42980.1	94	101	yes	yes	1	0.00012381	181.49	1	1	1	1	1	1	126260000	86237000	90965000	128420000	117100000	111380000
EVADADSLIASLGK	14	0	1387.72	AT1G63940.4;AT1G63940.1;AT1G63940.2;AT1G63940.3	AT1G63940.4	195	208	yes	no	2	0.00030638	148.28	1	1	1	1	1	1	52803000	76376000	61013000	61974000	77281000	49782000
EVAEFIQR	8	0	990.513	AT1G23310.1;AT1G23310.2	AT1G23310.1	115	122	yes	no	2	0.00014646	145.04			1	1	1	1	0	0	206690000	0	0	137710000
EVAEVVQSSVLPDMFK	16	0	1776.9	AT4G35830.1;AT4G35830.2	AT4G35830.1	599	614	yes	no	2	4.189e-27	227.31	1	2	2	1	1	2	11549000	27226000	33591000	16153000	9294800	23931000
EVCQNQSDSR	10	0	1221.5	AT5G48540.1	AT5G48540.1	102	111	yes	yes	2	3.4599e-09	165.15	1	1	1	1		1	74387000	64474000	76839000	28693000	0	55426000
EVDSVCADIYEWQSTLVNYQLHASGK	26	0	3011.4	AT3G13750.1	AT3G13750.1	733	758	yes	yes	3	7.2538e-30	176.1	1	1	1	1	1	1	42971000	22316000	35351000	36840000	42144000	38885000
EVDVPVVGGHAGVTILPLLSQVKPPSSFTPQEIEYLTNR	39	1	4186.23	AT5G09660.2;AT5G09660.1;AT5G09660.5;AT5G09660.3;AT5G09660.4	AT5G09660.2	188	226	yes	no	4	0.06519	16.379	1		1		1		16496000	0	15307000	0	12581000	0
EVDVVGVFR	9	0	1018.54	AT5G51970.2;AT5G51970.1	AT5G51970.2	302	310	yes	no	2	4.2947e-07	176.66	1	1	1	1	1	1	38682000	40862000	32327000	37767000	38986000	41734000
EVDYLLR	7	0	906.481	AT5G38420.1;AT5G38410.1;AT5G38410.3;AT5G38410.2;AT5G38430.2;AT5G38430.1	AT5G38420.1	84	90	no	no	1;2	3.2508e-15	214.01	3	4	3	3	3	3	10661000000	13246000000	9801800000	11381000000	11778000000	11284000000
EVEAVCNPIITAVYQR	16	0	1860.94	AT5G28540.1;AT5G42020.3;AT5G42020.1;AT5G42020.2	AT5G42020.3	635	650	no	no	2	1.3167e-27	197.31		1	1	1	1	1	0	14573000	11813000	20051000	24308000	22513000
EVEDAFETSAR	11	0	1252.56	AT5G51970.2;AT5G51970.1	AT5G51970.2	343	353	yes	no	2	7.1789e-34	213.85	1	1	1	1	1	1	56135000	0	65584000	0	0	39260000
EVEECKKEYPNAFIR	15	2	1910.92	AT1G67090.1	AT1G67090.1	141	155	yes	yes	3	0.0014915	74.678		1		1	1	1	0	49716000	0	54897000	39119000	51833000
EVEEFFATR	9	0	1126.53	AT4G33090.1	AT4G33090.1	829	837	yes	yes	2	1.2319e-06	145.16		1	1	1	1	1	0	34313000	25102000	0	48564000	24902000
EVELEDPVENIGAK	14	0	1540.76	AT1G55490.5;AT1G55490.4;AT1G55490.3;AT1G55490.2;AT1G55490.1;AT5G56500.2;AT5G56500.1	AT1G55490.5	114	127	no	no	2	3.8206e-27	195.27	1	1	1	1	1	1	93902000	125060000	93517000	49095000	54755000	56769000
EVFADIVSASEILGK	15	0	1576.83	AT4G34260.1	AT4G34260.1	589	603	yes	yes	2	3.1144e-53	237.37	1	1	1	1	1	1	233960000	158400000	194440000	183410000	199640000	170700000
EVGLPPGVLNVLTGFGSEAGAPLASHPGVDK	31	0	2984.56	AT1G74920.1;AT1G74920.2	AT1G74920.1	203	233	yes	no	3	3.8766e-21	111.18	1	1	1	1	1	1	31736000	29980000	31950000	37686000	34540000	30939000
EVIAINQDPHGVQAK	15	0	1617.85	AT5G08380.1	AT5G08380.1	310	324	yes	yes	2;3	1.5673e-27	160.84	2	2	2	2	2	2	3135900000	3262000000	2912300000	3232100000	3233600000	2909700000
EVIAVNQDK	9	0	1014.53	AT5G08370.2;AT5G08370.1	AT5G08370.2	270	278	yes	no	2	3.6342e-10	188.98	1	2	2	1	1	1	1361200000	1493200000	1718000000	1655200000	1655300000	1503500000
EVIQALK	7	0	799.48	AT5G13690.1;AT5G13690.2	AT5G13690.1	600	606	yes	no	2	0.061366	92.319			1	1	1	1	0	0	51838000	76223000	74205000	78336000
EVITDHK	7	0	840.434	AT5G58330.3;AT5G58330.2;AT5G58330.1	AT5G58330.3	193	199	yes	no	2	0.048615	97.602	1	1	1	1	1	1	26795000	29374000	22096000	15694000	19449000	18139000
EVITELK	7	0	830.475	AT5G17920.2;AT5G17920.1;AT2G43800.1	AT5G17920.2	190	196	yes	no	1;2	0.043774	143.02	2	2	2	2	2	2	403300000	464300000	417570000	413830000	379910000	381550000
EVLALCSYTALLDESATHGLFSSDSIER	28	0	3083.48	AT1G17290.1	AT1G17290.1	130	157	yes	yes	3	5.4787e-18	139.57				1		2	0	0	0	13199000	0	7591700
EVLLEAK	7	0	800.464	AT3G10740.3;AT3G10740.1;AT3G10740.4;AT3G10740.2	AT3G10740.3	205	211	yes	no	1;2	0.001341	185.42	2	2	1	1	1	1	1952100000	2338900000	1507400000	1302400000	1038800000	1060100000
EVLYDFEDK	9	0	1156.53	AT4G37930.1	AT4G37930.1	311	319	yes	yes	2	4.8167e-07	175.38	1	1	1	1	1	1	147420000	203460000	142970000	197680000	209040000	160300000
EVNLPIAVLGAEIDQVSPPELVR	23	0	2457.35	AT3G23570.3;AT3G23570.2;AT3G23570.1	AT3G23570.3	160	182	yes	no	2;3	4.9623e-124	210.34	1	1	2	2	1	2	22799000	18858000	26974000	28013000	27215000	34786000
EVPETERPFTFLR	13	1	1619.83	AT1G03475.1;AT4G03205.1;AT4G03205.2	AT1G03475.1	54	66	yes	no	2;3	2.4625e-06	122.39	2	2	2	2	1	2	71495000	71914000	84526000	80338000	44845000	81749000
EVPVNVPIVGK	11	0	1149.68	AT5G04140.1;AT5G04140.2	AT5G04140.1	214	224	yes	no	2	0.0069772	97.431	1	1	1	1	1	1	314380000	323600000	268130000	335080000	317260000	282840000
EVQKPLEDITDSLK	14	1	1613.85	AT3G01480.1;AT3G01480.2	AT3G01480.1	120	133	yes	no	2	0.00065098	116.03				1	1	1	0	0	0	83082000	88148000	92386000
EVQLVSFHTVSK	12	0	1372.74	AT1G23310.1;AT1G23310.2	AT1G23310.1	280	291	yes	no	2;3	3.7572e-26	202.16	2	2	2	2	2	2	196660000	235910000	194430000	259510000	236160000	262750000
EVSAVQSPSR	10	0	1058.54	AT1G17820.1	AT1G17820.1	740	749	yes	yes	2;3	0.0033021	123.69	2	2	1	2	2	2	208320000	130120000	69503000	302440000	268300000	380380000
EVSQLVNMYR	10	0	1237.61	AT3G26380.1;AT3G26380.2	AT3G26380.1	269	278	yes	no	2	0.00034959	134.48	3	3	1	2	2	3	65991000	68323000	15154000	61004000	56293000	78019000
EVSVTSWITDQVPVPGAFR	19	0	2087.07	AT5G18470.1	AT5G18470.1	188	206	yes	yes	2	0.00054394	131.69	1		1	1	1	1	8356200	0	5584500	9231800	6520100	4616600
EVTIPTPVAEK	11	0	1182.65	AT1G72150.1	AT1G72150.1	27	37	yes	yes	2	0.0092266	93.598	1	1	1	1	1	1	34176000	59433000	43280000	25311000	0	26721000
EVTIPTPVAEKEEVAAPVSDEK	22	1	2337.2	AT1G72150.1	AT1G72150.1	27	48	yes	yes	2;3	4.0311e-23	141.1	1	1	1		2		0	185330000	0	0	0	0
EVTNVGAASSVYK	13	0	1323.67	AT2G05920.1	AT2G05920.1	672	684	yes	yes	2	1.9187e-21	188.28	1	1	1	1	1	1	204520000	207000000	205810000	159510000	107430000	107360000
EVTVPGFDR	9	0	1018.51	AT1G76140.2;AT1G76140.1	AT1G76140.2	502	510	yes	no	2	0.037072	85.212	1		1	1		1	0	0	9524400	7750800	0	7884500
EVVFQLLPLSEIALR	15	0	1726	AT3G26720.1;AT3G26720.2;AT3G26720.5;AT3G26720.4;AT3G26720.3	AT3G26720.1	521	535	yes	no	2	8.9315e-36	255.3	1	1	1	1			40942000	25809000	45970000	62568000	0	0
EVVPGMIVTGMEVAEIDGAPR	21	0	2169.08	AT5G54770.1	AT5G54770.1	275	295	yes	yes	2;3	2.0588e-08	112.5	2	2	1	1		1	21747000	14085000	7332100	6435200	0	6757500
EVVSTEK	7	0	790.407	AT3G20390.1;AT3G20390.2	AT3G20390.1	65	71	yes	no	2	0.029039	110.63	1	1	1	1	1	1	76117000	80925000	69796000	78607000	73926000	69053000
EVVTQISSSLK	11	0	1189.66	AT5G13980.1;AT5G13980.2;AT5G13980.3	AT5G13980.1	721	731	yes	no	2	7.4232e-21	211.27	1	1	1	1	1	1	643490000	680320000	546610000	677620000	668110000	691190000
EVWLDGAK	8	0	916.465	AT2G28100.1	AT2G28100.1	187	194	yes	yes	2	0.0084939	127.12		1	1	1	1	1	0	24955000	22280000	32252000	32958000	35087000
EVYEGGK	7	0	780.365	AT4G34180.1	AT4G34180.1	33	39	yes	yes	2	0.051633	95.793	1	1	1			1	85821000	108570000	74083000	0	0	131990000
EWAEDFEDPEVHHR	14	0	1794.76	AT4G34260.1	AT4G34260.1	632	645	yes	yes	3	8.0385e-05	115.12	1	1	1	1	1	1	82030000	106750000	111470000	69154000	66074000	82782000
EYAAFPAPWLR	11	0	1319.67	AT4G33010.1;AT2G26080.1	AT4G33010.1	990	1000	no	no	2	6.445e-10	168.72	1	1	1	1	1	1	48733000	33452000	40382000	48203000	43300000	47154000
EYDAHSIYGFSETIATHK	18	0	2067.95	AT1G68560.1	AT1G68560.1	515	532	yes	yes	2;3;4	5.2847e-52	267.43	3	3	3	3	3	2	796160000	778730000	666820000	610080000	565030000	522160000
EYEAIANSINLSGNNISGEIPR	22	0	2360.16	AT2G34930.1	AT2G34930.1	782	803	yes	yes	2;3	7.5841e-137	355.25	1		1	1	1	1	0	0	32418000	47913000	0	0
EYFDGAGEDLLHHEPVDFVSDPSGFLSNVENEEVR	35	0	3947.78	AT4G24040.1	AT4G24040.1	147	181	yes	yes	4	1.256e-27	111.79	1	1	1	1	1	1	17657000	16293000	11682000	24521000	16891000	18683000
EYGGDVGFGFCAPR	14	0	1530.66	AT2G43510.1	AT2G43510.1	35	48	yes	yes	2	5.1538e-27	193.52	1	1	1	1	1	1	21806000	16167000	25156000	72884000	61674000	66744000
EYHWEVEYK	9	0	1281.57	AT5G21105.1;AT5G21105.3	AT5G21105.1	39	47	yes	no	2;3	6.6832e-06	168.27	2	2	2	1	2	2	34486000	37749000	42283000	11337000	49368000	34620000
EYIDGLLNSISVA	13	0	1392.71	AT1G50320.1	AT1G50320.1	170	182	yes	yes	2	3.6404e-05	124.23	1	1	1	1	1	1	16122000	10714000	9383500	25791000	21610000	18687000
EYLPIEGLAAFNK	13	0	1463.77	AT4G31990.4;AT4G31990.2;AT4G31990.1;AT4G31990.3	AT4G31990.4	110	122	yes	no	2	8.1088e-06	133.83	1	1	1	1	1	1	30357000	27777000	27332000	30619000	40499000	33824000
EYPGAFIR	8	0	951.481	AT5G38420.1;AT5G38410.1;AT5G38410.3;AT5G38410.2;AT5G38430.2;AT5G38430.1	AT5G38420.1	148	155	no	no	1;2	0.024351	138.48	2	2	2	2	2	2	1684500000	2802600000	1979400000	1679500000	1850200000	2068400000
EYPIAQDLPNVDISAVGVTSFEGPEGK	27	0	2831.39	AT1G23190.1	AT1G23190.1	162	188	yes	yes	3	8.0046e-09	93.176		1	1		1	1	0	6631600	12000000	0	16204000	14350000
EYPNAFIR	8	0	1008.5	AT1G67090.1	AT1G67090.1	148	155	yes	yes	2	0.0081632	127.95	1	1	1	1	1	1	1230400000	1689300000	1040800000	1398700000	1064400000	1184400000
EYSNTGAGAGTANR	14	0	1367.61	AT3G14310.1	AT3G14310.1	538	551	yes	yes	2	4.5448e-42	218.18	1	1	1	1	1	1	49824000	62668000	52009000	18866000	27537000	21591000
EYTDVISDVALLASDR	16	0	1765.87	AT4G36760.3;AT4G36760.1;AT4G36760.2	AT4G36760.3	249	264	yes	no	2	1.8856e-38	174.9	1			1	1	1	9202600	0	0	0	9547900	9837700
EYVGDRLPEFSETEAALVK	19	1	2152.07	AT5G26000.2;AT5G26000.1	AT5G26000.2	319	337	yes	no	2;3	1.2358e-110	267.17	2	1	2	2	2	1	64728000	49591000	83032000	72667000	86306000	47921000
EYYQDTALDSHR	12	0	1496.65	AT4G37000.1	AT4G37000.1	184	195	yes	yes	2	1.1279e-05	136.63			1	1	1		0	0	0	9855200	10995000	0
FAAGTEAIANK	11	0	1091.56	AT3G12780.1	AT3G12780.1	407	417	yes	yes	2	5.8613e-12	183.47	1	1	1	1	1	1	343850000	331820000	318120000	310060000	362490000	334850000
FAAGTEAVAK	10	0	963.503	AT1G79550.2;AT1G79550.1	AT1G79550.2	332	341	yes	no	2	0.012717	99.136	1	1	1	1	1	1	67331000	71004000	68249000	73990000	87806000	69340000
FADACLR	7	0	851.396	AT5G09660.2;AT5G09660.1;AT5G09660.5;AT5G09660.3;AT5G09660.4	AT5G09660.2	255	261	yes	no	2	0.0062697	150.07	1	1	1	1	1	1	36942000	49537000	42433000	33249000	40002000	34081000
FADAVVIQK	9	0	989.555	AT4G26690.1	AT4G26690.1	577	585	yes	yes	2	0.0075113	120.46	1	1	1	1	1	1	32546000	54464000	42067000	35982000	33425000	27592000
FADELIANAAYIGTPGK	17	0	1749.89	AT2G36460.1;AT5G03690.2;AT3G52930.1	AT3G52930.1	8	24	no	no	2	3.4279e-10	163.51	1	1		1	1	1	0	0	0	0	0	32664000
FADLIEENIEELAK	14	0	1632.82	AT3G24503.1	AT3G24503.1	90	103	yes	yes	2	2.4725e-08	183.33	1	1	1	1	1	1	25271000	16619000	16977000	19835000	16556000	14111000
FADYGGSLLFVPAGR	15	0	1568.8	AT4G23500.1	AT4G23500.1	97	111	yes	yes	2	8.8191e-13	169.58			1			1	0	0	24767000	0	0	33472000
FAEAFSEAVQK	11	0	1225.6	AT1G79440.1	AT1G79440.1	347	357	yes	yes	2	0.022963	87.149	1		1	1			0	0	19995000	21509000	0	0
FAESQLFK	8	0	968.497	AT4G38220.1;AT4G38220.2	AT4G38220.1	170	177	yes	no	2	0.033127	98.009	1	1			1		0	16323000	0	0	15828000	0
FAGGSEQEFFAEFSNSMEK	19	0	2140.9	AT4G11290.1	AT4G11290.1	286	304	yes	yes	2;3	5.0243e-209	333.47	3	3	4	2	3	4	109120000	47444000	142820000	36360000	61117000	121930000
FAIVVAR	7	0	774.475	AT2G44050.1	AT2G44050.1	87	93	yes	yes	2	0.0097309	130.84	1		1	1	1	1	0	0	15737000	15722000	16713000	18214000
FALESFWDGK	10	0	1198.57	AT3G03780.3;AT3G03780.2;AT3G03780.1;AT5G17920.2;AT5G17920.1;AT5G20980.2;AT5G20980.1	AT5G17920.2	19	28	no	no	1;2	2.7522e-09	167.04	2	1	2	2	2	3	181910000	141580000	169550000	240040000	184270000	199090000
FALSGIGAVGCSPNALAGSPDGR	23	0	2173.06	AT1G29670.1;AT1G29670.2	AT1G29670.1	215	237	yes	no	2;3	3.3257e-143	366.95	2	2	2	2	2	2	393290000	303030000	411570000	419660000	335600000	371720000
FALVGIGAIGCSPNALAQGSQDGTTCVER	29	0	2948.41	AT1G29660.1	AT1G29660.1	215	243	yes	yes	2;3	4.6113e-133	202.15	2	2	2	2	2	2	300520000	243400000	335600000	402970000	418360000	440710000
FALVGIGAIGCSPNELAQNSR	21	0	2173.09	AT4G18970.1;AT4G18970.2	AT4G18970.1	212	232	yes	no	2;3	1.0603e-43	162.15	2	2	2	1	1	2	69290000	58285000	59894000	23226000	24878000	70562000
FANAVVINK	9	0	974.555	AT1G66970.3;AT1G66970.1;AT1G66970.2;AT1G66980.4;AT1G66980.1;AT1G66980.3;AT1G66980.2	AT1G66970.3	390	398	yes	no	2	0.0090927	113.7	1	1	1	1	1	1	60198000	58710000	43539000	93709000	81852000	94957000
FANFSIESEVPK	12	0	1366.68	AT1G78380.1	AT1G78380.1	170	181	yes	yes	2	0.00021852	121.9	1			1	1	1	134770000	0	0	518070000	577090000	237580000
FAPDANSK	8	0	848.403	AT1G79550.2;AT1G79550.1;AT3G12780.1	AT3G12780.1	352	359	no	no	2	0.0018839	155.51	1	1	1	1	1	1	114370000	103610000	95421000	99943000	117370000	93971000
FAQPVYEAIR	10	0	1192.62	AT1G09750.1	AT1G09750.1	336	345	yes	yes	1;2	4.5159e-09	196.95	2	1	2	2	1	2	4515700000	5078300000	4443700000	7417800000	6232700000	6989000000
FAQPVYEAIRDEFR	14	1	1739.86	AT1G09750.1	AT1G09750.1	336	349	yes	yes	2;3	1.0232e-74	263.07	3	2	2	5	3	3	10095000000	6694800000	8086700000	15234000000	13477000000	11130000000
FAQPVYEAIRDEFRK	15	2	1867.96	AT1G09750.1	AT1G09750.1	336	350	yes	yes	3	0.001455	91.441			1	1	1	1	0	0	37899000	86884000	95169000	97325000
FAQTLMER	8	0	994.491	AT4G37930.1	AT4G37930.1	366	373	yes	yes	2	0.0034789	143.11	2	2	2	2	1	2	85142000	69081000	87533000	83959000	30901000	129840000
FAQVTNPAIDPLR	13	0	1440.77	AT5G04140.1;AT5G04140.2;AT2G41220.1	AT5G04140.1	608	620	no	no	2	2.1428e-81	272.58	1	1	1	1	1	1	260740000	329840000	291770000	338980000	305680000	286440000
FASFGTPEGTCGSYR	15	0	1635.7	AT3G13750.1	AT3G13750.1	782	796	yes	yes	2	7.4523e-91	267.85	1		1	1	1	1	375750000	0	351560000	597950000	618230000	622520000
FASINVENIESNR	13	0	1491.73	AT4G26530.3;AT4G26530.2;AT4G26530.1	AT4G26530.3	40	52	yes	no	2	7.6943e-05	141.88			1	1	1	1	0	0	0	36925000	53331000	52346000
FASVSTR	7	0	766.397	AT2G34810.1	AT2G34810.1	75	81	yes	yes	2	2.4461e-05	180.49	1	2		1	1	1	76576000	93040000	0	64446000	89057000	0
FAVCLTSGK	9	0	981.495	AT1G03220.1	AT1G03220.1	200	208	yes	yes	1;2	0.004265	133.58	2	2	2	2	2	2	486820000	424400000	465060000	537290000	595270000	505910000
FCDALISIR	9	0	1093.56	AT4G33010.1;AT4G33010.2;AT2G26080.1	AT4G33010.1	942	950	no	no	2	0.0025614	133.86	1	1	1	1	1	1	246360000	240170000	273620000	364720000	445810000	361680000
FCEEEDAAH	9	0	1106.4	AT1G32470.1;AT2G35370.1	AT1G32470.1	158	166	no	no	2	7.7119e-05	155.19	1	1	1	1	1	1	147100000	145340000	136710000	86223000	98254000	91785000
FCGFDHIDSLIDATVPK	17	0	1933.92	AT4G33010.1;AT4G33010.2	AT4G33010.1	97	113	yes	no	2;3	1.7781e-19	176.42	2	2	2	2	2	2	118670000	104930000	140320000	143240000	173690000	156080000
FCGTVPHR	8	0	972.46	AT4G13340.1;AT4G18670.1	AT4G13340.1	150	157	no	no	2	0.022177	106.43	1	1	1	1	1	1	33219000	36737000	34544000	16188000	20355000	0
FCPTVCNFCK	10	0	1331.55	AT1G17860.1	AT1G17860.1	155	164	yes	yes	2	6.0763e-11	175.38	1	1	1	1	1	1	387640000	416470000	433260000	545310000	554470000	580580000
FCSPELSDIITK	12	0	1408.69	AT3G46970.1	AT3G46970.1	497	508	yes	yes	2	0.0073725	87.568				1	1	1	0	0	0	24302000	34722000	32305000
FCTGGMSLGAISR	13	0	1355.63	AT5G04140.1;AT5G04140.2;AT2G41220.1	AT5G04140.1	971	983	no	no	2	0.0031425	87.363	1		1	1	1	2	0	0	19836000	0	17969000	57271000
FDAEGNLVDEVTK	13	0	1435.68	AT3G27890.1	AT3G27890.1	164	176	yes	yes	2	0.00014902	109.24	1	1	1	1	1	1	44091000	36971000	0	0	0	50622000
FDAGIVSLEHR	11	0	1242.64	AT4G36195.1;AT4G36195.3;AT4G36195.2	AT4G36195.1	108	118	no	no	3	0.014587	70.728		1		1	1	1	0	20903000	0	22418000	26948000	0
FDAGLTESQMIQHMVDLASK	20	0	2220.06	AT4G33010.1;AT4G33010.2	AT4G33010.1	125	144	yes	no	3	2.2757e-06	114.46	1	1	1		1	1	12281000	6915600	9891500	0	16995000	16792000
FDDLFFYGIDSA	12	0	1408.62	AT3G16400.2;AT3G16400.1	AT3G16400.2	459	470	no	no	2	0.00023297	121.53	1	1	1	1	1	1	25918000	28078000	24693000	30671000	24794000	27787000
FDFTVQNDGEDVTLETDVVTAK	22	0	2442.14	AT4G12730.1	AT4G12730.1	285	306	yes	yes	2;3	9.5349e-84	302.63	2	2	2	2	2	2	107350000	72503000	134460000	100700000	110900000	118110000
FDGAFPSISPEGDR	14	0	1493.68	AT1G21670.1	AT1G21670.1	398	411	yes	yes	2;3	5.5523e-19	178.81	1	1	1	1	2	1	1569400000	2249200000	1814000000	2550400000	2406200000	2267800000
FDGEAFLK	8	0	925.455	AT2G34070.1	AT2G34070.1	120	127	yes	yes	2	0.063182	84.916	1	1	1	1	1	1	167110000	178790000	173920000	267720000	227310000	202880000
FDGGAFLR	8	0	881.44	AT1G29050.1	AT1G29050.1	116	123	yes	yes	2	0.0039665	140.98	1	1	1	1	1	1	46024000	65983000	54781000	60362000	76457000	90686000
FDLAFCGSLLR	11	0	1297.65	AT3G48420.1	AT3G48420.1	304	314	yes	yes	2	4.8083e-07	150.85	1	1	1	1	1	1	0	0	13324000	11229000	15610000	8632600
FDLTTSTSGDEVILHTGVAPSR	22	0	2302.14	AT2G45470.1	AT2G45470.1	285	306	yes	yes	2;3	6.8149e-70	227.47	2	1	2	2	2	1	773720000	550330000	828070000	1116000000	1176700000	951120000
FDMGGSAAVLGAAK	14	0	1293.64	AT2G24200.1;AT2G24200.2;AT2G24200.3;AT4G30920.1	AT2G24200.1	312	325	no	no	2	0.0047083	94.616	1	1	1		1	1	23783000	29080000	27398000	0	0	0
FDNELGALFDK	11	0	1267.61	AT5G48540.1	AT5G48540.1	152	162	yes	yes	2	1.1076e-09	164.65	1	1	1	1	1	1	174550000	166690000	205010000	270010000	219760000	219670000
FDNVLSGCTAK	11	0	1210.57	AT5G57850.2;AT5G57850.1	AT5G57850.2	199	209	yes	no	2	0.0015719	120.09	1	1	1	1	1	1	31169000	22767000	0	0	21784000	18559000
FDPDTILIEAYFDPVCPDSR	20	0	2369.09	AT1G76020.3;AT1G76020.1	AT1G76020.3	38	57	yes	no	2	6.8377e-24	151.74	1		1	1	1	1	0	0	0	9216800	9447900	0
FDPIGQGEGGEVELESDK	18	0	1904.86	AT4G02510.4;AT4G02510.3;AT4G02510.2;AT4G02510.1	AT4G02510.4	433	450	yes	no	2	0.013922	59.898			1	1	1	1	0	0	0	27344000	23730000	11203000
FDPSFYPR	8	0	1027.48	AT1G03475.1	AT1G03475.1	241	248	yes	yes	2	0.013134	117.93	1	1				1	21269000	27178000	0	0	0	20448000
FDPVPSAIPGILITDVSK	18	0	1868.03	AT2G19170.2;AT2G19170.1	AT2G19170.2	477	494	yes	no	2	0.00035348	88.552	1	1	1	1	1	1	19825000	13878000	0	18118000	14575000	14329000
FDSYSFFHNK	10	0	1290.57	AT5G06870.1	AT5G06870.1	310	319	yes	yes	2	0.0036048	122.52	1	1	1				17874000	25737000	18048000	0	0	0
FDVEVFDPADDYVK	14	0	1657.75	AT1G23190.1	AT1G23190.1	189	202	yes	yes	2	0.00069528	106.67	1	1	1	1	1	1	32785000	27722000	25911000	29979000	31689000	29478000
FDVEVFDSADDYVK	14	0	1647.73	AT1G70730.1;AT1G70730.3;AT1G70730.2	AT1G70730.1	190	203	yes	no	2	0.00012889	130.1		1	1	1	1	1	0	13516000	22882000	26762000	29163000	31801000
FDVVGPVCESADFLGK	16	0	1738.82	AT5G11880.1;AT3G14390.1	AT5G11880.1	409	424	yes	no	2	2.1332e-05	141.73	1	1		1	1	1	24983000	17603000	0	24695000	17789000	21682000
FDYILTQQALVAVDSGAAINR	21	0	2264.18	AT3G58610.3;AT3G58610.2;AT3G58610.1	AT3G58610.3	526	546	yes	no	3	0.005226	47.814	1		1	1		1	6561900	0	4863100	5156100	0	5023000
FEDENFER	8	0	1084.45	AT4G38740.1;AT2G21130.1	AT4G38740.1	90	97	yes	no	2	8.4974e-08	194.92	1	1	1	1	1	1	142930000	229430000	169320000	134790000	154100000	157510000
FEDENFTLK	9	0	1141.53	AT3G62030.3;AT3G62030.1;AT3G62030.2	AT3G62030.3	173	181	yes	no	1;2	0.001921	136.21	2	2	2	2	2	2	2926700000	3209200000	2371500000	2897700000	3058900000	2504300000
FEDIYDVDK	9	0	1142.51	AT1G51630.1	AT1G51630.1	140	148	yes	yes	2	0.015435	102.72	1	1	1	1		1	33962000	102180000	98800000	33407000	0	31731000
FEDNFDATSNLNVMVTPTDK	20	0	2257.02	AT1G06680.1;AT1G06680.2	AT1G06680.1	126	145	yes	no	2;3	3.4873e-24	186.68	1	1	1	1	1	2	63492000	37000000	23122000	28037000	0	72133000
FEDNFDATSNLNVMVTPTDKK	21	1	2385.12	AT1G06680.1;AT1G06680.2	AT1G06680.1	126	146	yes	no	3	0.0036689	30.981				1		1	0	0	0	30086000	0	46870000
FEDQYFK	7	0	975.434	AT4G20860.1	AT4G20860.1	366	372	yes	yes	2	0.015977	121.29	1	1	1	1	1	1	135790000	291050000	197680000	240200000	245390000	247000000
FEECSDEVEDVLR	13	0	1625.69	AT1G15000.1	AT1G15000.1	305	317	yes	yes	2	1.6872e-21	189.72	1	1	1	1	1	1	62153000	51071000	49525000	70764000	81894000	86113000
FEEGAEQFR	9	0	1111.49	AT3G05625.2;AT3G05625.1	AT3G05625.2	119	127	yes	no	2	0.01306	105.57	1	1	1	1	1	1	23302000	38598000	37455000	21572000	27995000	24021000
FEELGVEFAK	10	0	1167.58	AT1G08110.3;AT1G08110.2;AT1G08110.1;AT1G08110.4	AT1G08110.3	139	148	yes	no	2	8.3455e-05	145.17	1	1	1	1	1	1	61867000	68264000	63920000	68820000	72265000	58432000
FEELNMDLFR	10	0	1312.61	AT3G12580.1;AT5G02500.1;AT5G02500.2	AT3G12580.1	308	317	no	no	2	2.6626e-11	149.94	2	2	2	2	2	2	14340000	21569000	25117000	28333000	11136000	31751000
FEELNNDLFR	10	0	1295.61	AT5G28540.1;AT5G42020.3;AT5G42020.1;AT5G42020.2	AT5G42020.3	338	347	no	no	2	0.0013028	131.44	1	1	1	1	1	1	35430000	48306000	45738000	57811000	50519000	26161000
FEETLYGTSR	10	0	1201.56	AT3G55800.1	AT3G55800.1	374	383	yes	yes	2	1.4756e-11	184.36	1	1	1	1	1	1	384770000	401230000	290810000	362850000	378080000	414570000
FEGITMAPPDPILGVSEAFK	20	0	2118.07	AT4G31990.4;AT4G31990.2;AT4G31990.1;AT4G31990.3	AT4G31990.4	48	67	yes	no	2;3	9.3163e-06	118.13	1	2	2	2	3	3	6890300	8453100	23029000	27534000	38557000	43035000
FELTVQNDGEK	11	0	1278.61	AT5G55730.2;AT5G55730.1	AT5G55730.2	282	292	yes	no	2	4.3715e-27	214.83	1	1	1	1	1	1	133190000	172040000	170190000	155880000	158640000	173850000
FENPILSK	8	0	946.512	AT2G24200.1;AT2G24200.2;AT2G24200.3	AT2G24200.1	52	59	yes	no	2	0.030515	100.02	1	1		1	1	1	39232000	56850000	0	52079000	46015000	35865000
FESLTDK	7	0	838.407	AT5G56030.1;AT5G56010.1;AT5G56000.1;AT5G56030.2;AT5G52640.1	AT5G56030.1	48	54	yes	no	2	0.062523	91.906	1	1	1	1	1	1	20796000	20003000	18629000	15054000	12610000	13683000
FETLSYLPDLSDVELAK	17	0	1938.98	AT5G38420.1;AT5G38410.1;AT5G38410.3;AT5G38410.2	AT5G38420.1	67	83	yes	no	2	0.00020425	171.62	2	2	1	2	2	2	3441900000	3072200000	3322800000	5543200000	4862400000	4399100000
FETLSYLPDLTDSELAK	17	0	1940.96	AT1G67090.1;AT1G67090.2	AT1G67090.1	67	83	yes	no	2;3	1.188e-05	187.62	4	4	2	4	3	5	4993200000	3168600000	3109700000	6781900000	5966900000	4536600000
FETLSYLPDLTDVELAK	17	0	1953	AT5G38430.2;AT5G38430.1	AT5G38430.2	67	83	yes	no	2;3	1.3503e-19	179.02	2	2	2	1	2	2	926210000	741540000	801370000	981980000	1139800000	1016200000
FETVVSGETQVVSGTNYR	18	0	1971.95	AT5G47550.1	AT5G47550.1	63	80	yes	yes	2;3	2.3084e-146	295.78	2	2	1	2	2	1	416780000	327350000	234630000	561880000	270910000	203790000
FETYIFGLFNEEGKPGPTAER	21	1	2401.16	AT3G55430.1	AT3G55430.1	306	326	yes	yes	3	2.8141e-08	142.98	1	1	1	1	1		29876000	28173000	23206000	28316000	23905000	0
FEVIFSPALGR	11	0	1234.67	AT2G33255.1	AT2G33255.1	145	155	yes	yes	2	0.012226	87.913	1	1	1		1		0	4869900	9607100	0	9302500	0
FFAESSGATLLTSTLK	16	0	1671.87	AT3G10740.3;AT3G10740.1;AT3G10740.4;AT3G10740.2	AT3G10740.3	538	553	yes	no	2;3	3.2576e-09	193.23	3	2	4	2	4	3	2635900000	2310000000	2835000000	1997500000	2132600000	2014700000
FFASQGGPIILSQIENEFEPDLK	23	0	2578.3	AT1G45130.1;AT1G45130.2	AT1G45130.1	171	193	yes	no	3	8.2527e-16	150.91	2	2	1	1		1	51621000	34142000	34971000	38571000	0	31555000
FFDNAIGVNVPR	12	0	1347.69	AT3G03250.3;AT3G03250.1;AT3G03250.2;AT5G17310.2;AT5G17310.6;AT5G17310.4;AT5G17310.3;AT5G17310.5;AT5G17310.1	AT3G03250.3	342	353	no	no	2	1.4643e-06	137.05	1	1	1	1	1	1	87031000	70159000	83737000	93457000	101410000	75063000
FGEYHSEK	8	0	995.435	AT1G28600.1	AT1G28600.1	254	261	yes	yes	2	0.00011366	174.27	1	1	1	1	1	1	144670000	137510000	139990000	139670000	134480000	124980000
FGFDDAFNYK	10	0	1222.53	AT5G16970.1;AT5G16960.2;AT5G16960.1;AT1G26320.2;AT3G03080.1;AT1G26320.1	AT5G16970.1	200	209	no	no	2	0.02245	110.38	1		1	1	1	1	12386000	0	9286200	12241000	13147000	9802700
FGFSSTLLGR	10	0	1083.57	AT1G03220.1;AT1G03230.1	AT1G03220.1	411	420	no	no	2	1.6389e-06	170.22	1	1	1	1	1	1	652920000	609120000	648980000	637900000	752760000	762170000
FGGAIDDAAR	10	0	991.472	AT5G49460.2;AT5G49460.1;AT3G06650.2;AT3G06650.1	AT5G49460.2	448	457	yes	no	2	0.05128	88.948	1		1	1		1	18279000	0	18235000	10723000	0	14601000
FGGEEETPSSR	11	0	1194.52	AT3G16400.2;AT3G16400.1	AT3G16400.2	420	430	no	no	2	4.5098e-15	192.26		1					0	133840000	0	0	0	0
FGGPVPYRPAEDMAFSVAR	19	1	2066	AT3G13750.1	AT3G13750.1	268	286	yes	yes	3	0.00035282	90.316	1	1	1	1	2	1	43912000	33220000	55934000	40553000	76729000	63218000
FGGTIFDR	8	0	911.45	AT3G56060.1;AT1G12570.1	AT3G56060.1	199	206	no	no	2	0.011231	120.92	1	1	1	1	1	1	59888000	74007000	58464000	51027000	67099000	61032000
FGLAVGVHNEEGRDEFR	17	1	1930.93	AT3G44310.3;AT3G44310.1;AT3G44320.1	AT3G44310.3	77	93	yes	no	3	0.00051934	83.54	1	1	1			1	25958000	26278000	31401000	0	0	11874000
FGLGADNVLDAR	12	0	1246.63	AT2G34790.1;AT1G30760.1;AT1G30760.2	AT2G34790.1	200	211	no	no	2	5.6922e-95	282.06	1	1	1	1	1	1	610180000	543680000	591340000	446600000	443690000	444460000
FGLGDKPANK	10	1	1045.56	AT5G09650.1	AT5G09650.1	261	270	yes	yes	2	6.0954e-45	249.55	1	1	1	1	1	1	153150000	160220000	138680000	154360000	172660000	156620000
FGLSVDNLIDAK	12	0	1290.68	AT4G20840.1	AT4G20840.1	202	213	yes	yes	1;2	7.3603e-43	233.09	2	1	1	2	1	1	242510000	184080000	263070000	360540000	336970000	379500000
FGLSVDYVEDAK	12	0	1341.65	AT4G20830.2;AT4G20830.1	AT4G20830.2	203	214	yes	no	2	3.7423e-26	202.2	1	1	1	1	1	1	438800000	401520000	649540000	852080000	1008300000	936530000
FGNFSIESESPK	12	0	1340.62	AT1G78370.1	AT1G78370.1	170	181	yes	yes	2	6.387e-05	115.23	1		1	1	1	1	20825000	0	17690000	22698000	27042000	44475000
FGPSCSIQDFK	11	0	1284.58	AT1G21670.1	AT1G21670.1	668	678	yes	yes	2	1.9212e-20	239.42	1	1	1	1	1	1	1433000000	1587800000	1321000000	2058100000	1883800000	1765700000
FGQVGVGNNLDQCSPVQVR	19	0	2073.01	AT5G63860.1	AT5G63860.1	305	323	yes	yes	2	3.0184e-39	203.82				1			0	0	0	24032000	0	0
FGSLAATNTAK	11	0	1079.56	AT4G24350.1;AT4G24350.3;AT4G24340.1	AT4G24350.1	314	324	yes	no	2	1.1171e-10	173.39	1	1	1	1	1	1	183190000	218630000	202910000	156270000	174500000	187480000
FGSVGSPVTQR	11	0	1133.58	AT1G02360.1;AT1G02360.2;AT1G02360.3	AT1G02360.1	72	82	yes	no	2	2.5244e-15	195.79	1	1	1	1	1	1	764250000	957170000	743320000	925020000	814710000	1040200000
FGTDSTK	7	0	754.35	AT1G54790.1;AT1G54790.3;AT1G54790.2	AT1G54790.1	231	237	yes	no	2	0.01917	118.69	1	1	1	1	1	1	294280000	198900000	360520000	161320000	177370000	299430000
FGTTIFTETVNK	12	0	1356.69	AT2G17420.2;AT2G17420.1	AT2G17420.2	133	144	yes	no	2	0.00084401	108.43		1	1		1	1	0	0	15892000	0	0	0
FGVEPSGCVGLAK	13	0	1319.65	AT1G11930.2;AT1G11930.1	AT1G11930.2	157	169	yes	no	2	0.0012738	96.665	1	1					24462000	21903000	0	0	0	0
FGVINYK	7	0	839.454	AT1G61820.1	AT1G61820.1	121	127	yes	yes	2	0.060061	92.785	1	1	1		1	1	9684000	23604000	11848000	0	22188000	16088000
FGVNEFVNPK	10	0	1149.58	AT5G43940.1;AT5G43940.2	AT5G43940.1	238	247	yes	no	2	5.45e-11	205.36	1	1	1	1	1	1	165000000	153300000	154580000	75393000	56138000	98595000
FGVTPTFLVNADQLEIK	17	0	1891.01	AT5G04140.1;AT5G04140.2;AT2G41220.1	AT5G04140.1	1050	1066	no	no	2	1.7651e-08	206.64	1	1	1	1	1	1	215700000	157230000	190660000	273120000	271440000	265330000
FHDLVPIDGLWIDMNEVSNFCSGLCTIPEGK	31	0	3562.66	AT1G68560.1	AT1G68560.1	428	458	yes	yes	3	2.2032e-22	122.66	1	1	1	1		1	38573000	14817000	41848000	17146000	0	13113000
FHGHSPAVVTGK	12	0	1235.64	AT5G07440.1;AT5G07440.2;AT5G07440.3	AT5G07440.1	160	171	no	no	2;3	0.01047	80.706	1		1	1	1	1	14792000	0	9727900	12528000	0	10272000
FIAPVFADLAK	11	0	1190.67	AT5G42980.1	AT5G42980.1	44	54	yes	yes	2	0.004139	105.4	1	1	1	1	1	1	375030000	381630000	444570000	386680000	393620000	386240000
FIAPVFAEMAK	11	0	1222.64	AT1G45145.1	AT1G45145.1	44	54	yes	yes	2	0.010077	86.624	2		2	2	2	2	25458000	0	27896000	17588000	23026000	30267000
FIHYVNK	7	0	919.492	AT3G26720.1;AT3G26720.2;AT3G26720.5;AT3G26720.4;AT3G26720.3	AT3G26720.1	308	314	yes	no	2	0.047211	98.513	1	1	1	1	1	1	60800000	64922000	53097000	63657000	60814000	57366000
FIIEAANHPTDPDADEILSK	20	0	2195.07	AT5G18170.1	AT5G18170.1	306	325	yes	yes	3	0.017988	29.126		1	1	1		1	0	22035000	25685000	22841000	0	21643000
FILGVSTIK	9	0	976.596	AT1G30600.1	AT1G30600.1	454	462	yes	yes	2	0.043713	80.438			1	1	1	2	0	0	10782000	13340000	10798000	12552000
FISPNEVSVETIDGGNTIVK	20	0	2118.08	AT1G48030.5;AT1G48030.4;AT1G48030.3;AT1G48030.2;AT1G48030.1	AT1G48030.5	157	176	yes	no	2	5.7176e-12	197.14	1	1	1	1	1	1	134280000	112990000	111720000	147240000	133490000	144720000
FISVPGGHIEITEEDLVK	18	0	1982.04	AT4G17470.4;AT4G17470.3;AT4G17470.2;AT4G17470.1	AT4G17470.4	272	289	yes	no	3	0.00048341	69.148	1			1	1	1	0	0	0	35104000	43667000	44299000
FITDVASTINHDPEIGDLLK	20	0	2197.13	AT3G29320.1	AT3G29320.1	750	769	yes	yes	3	0.016181	41.521	1	1	1	1		1	9724900	12965000	13441000	17655000	0	16415000
FITPEGELEVECDDDVYVLDAAEEAGIDLPYSCR	34	0	3888.72	AT1G60950.1	AT1G60950.1	59	92	yes	yes	3;4	3.2954e-37	173.09	2		1	1	1	1	262860000	0	115710000	184340000	192150000	14012000
FITPEGEQEVECEEDVYVLDAAEEAGLDLPYSCR	34	0	3931.73	AT1G10960.1	AT1G10960.1	59	92	yes	yes	3;4	7.8473e-54	193	1		1	2	2	2	94877000	0	60140000	136330000	147140000	129700000
FIVEAANHPTDPDADEILSK	20	0	2181.06	AT5G07440.1;AT5G07440.2	AT5G07440.1	306	325	yes	no	3	6.1674e-05	74.505	1	1	1		1	1	38507000	47673000	33437000	0	49429000	52704000
FIVVADDTK	9	0	1006.53	AT3G04790.1	AT3G04790.1	159	167	yes	yes	2	0.014003	104.44	1	1	1	1	1	1	102390000	215200000	172530000	114470000	140220000	187540000
FIYVEQAFFQR	11	0	1446.73	AT5G13980.1;AT5G13980.2;AT5G13980.3	AT5G13980.1	90	100	yes	no	2	4.3457e-27	214.9	1	1	1	1	1	1	29701000	23789000	33240000	40829000	38444000	42615000
FKDLVADDK	9	1	1049.54	AT1G49750.1	AT1G49750.1	134	142	yes	yes	2	9.1002e-09	192.32	1	1	1	1	1	1	533380000	454900000	438120000	276970000	298780000	283490000
FLAIDAVEK	9	0	1004.55	AT3G60750.2;AT3G60750.1;AT2G45290.2;AT2G45290.1	AT3G60750.2	90	98	yes	no	2	0.057589	80.165				1	1	1	0	0	0	22891000	19125000	24962000
FLANIDPVDVAR	12	0	1328.71	AT5G42740.3;AT5G42740.2;AT5G42740.1	AT5G42740.3	154	165	yes	no	2	1.9999e-06	146.11	1	1	1	1	1	1	52153000	37044000	42282000	52661000	49341000	55589000
FLAPDDSSSK	10	0	1065.5	AT5G63180.1	AT5G63180.1	347	356	yes	yes	2	0.0069851	108.98	1	1	1	1	1	1	92555000	126180000	80624000	152320000	133700000	131080000
FLAPNIR	7	0	829.481	AT4G24780.2;AT4G24780.1	AT4G24780.2	325	331	yes	no	2	0.036565	105.42	1	1	1			1	40319000	42376000	28417000	0	0	21365000
FLCSLDYTVDHIVAIVK	17	0	1992.04	AT2G05920.1	AT2G05920.1	620	636	yes	yes	3	0.00016777	99.451	1	1	1	1	1	1	8127400	5685700	12519000	9507000	7405800	6304000
FLDILQDLHGEDLR	14	0	1682.86	AT1G53310.3;AT1G53310.2;AT1G53310.1;AT3G14940.2;AT3G14940.1	AT1G53310.3	41	54	yes	no	3	0.00020069	85.42		1	1	1	1		0	7602000	9267700	0	0	0
FLDILQDLHGEDVR	14	0	1668.85	AT2G42600.3;AT2G42600.2;AT2G42600.1	AT2G42600.3	41	54	yes	no	3	3.8491e-05	126.63	1	1	1	1	1	1	22438000	12708000	17380000	23468000	14598000	16806000
FLDLSANELNGQIHGFLDAFSR	22	0	2463.22	AT2G34930.1	AT2G34930.1	324	345	yes	yes	3	2.3777e-18	172.81	1		1	1	1		35191000	0	5133800	46800000	52316000	0
FLDLSSNEFYGK	12	0	1418.67	AT1G33610.1	AT1G33610.1	227	238	yes	yes	2	8.0803e-17	175.73	1	1	1	1	1	1	89745000	101160000	117670000	168290000	153660000	138580000
FLELGHNK	8	0	956.508	AT1G33590.1;AT1G33590.3;AT1G33590.2	AT1G33590.1	251	258	yes	no	1;2	0.027001	129.68	2	2	2	2	2	2	4410000000	6507900000	4884600000	6603900000	7041700000	7214200000
FLEQDTPLMIFEPLGGK	17	0	1933.99	AT4G20860.1	AT4G20860.1	394	410	yes	yes	2	4.3885e-38	208.68	2	2	2	2	2	2	250430000	180960000	243840000	240280000	274910000	394220000
FLETLLNK	8	0	976.559	AT3G48460.1	AT3G48460.1	212	219	yes	yes	1;2	1.571e-06	187.34	2	2	2	2	2	2	261050000	281010000	248160000	484990000	454140000	404630000
FLFCAEAIYK	10	0	1260.62	ATCG00490.1	ATCG00490.1	218	227	yes	yes	1;2	0.00027904	138.1	3	2	2	2	2	2	2079600000	1180000000	2244500000	3298000000	3321500000	2456500000
FLGAFTNLETK	11	0	1239.65	AT1G65900.2;AT1G65900.1	AT1G65900.2	146	156	yes	no	2	0.0027831	123.88	1		1	1	1		30256000	0	22654000	22311000	25572000	0
FLGDIVVQLDK	11	0	1245.7	AT1G63770.7;AT1G63770.4;AT1G63770.6;AT1G63770.5;AT1G63770.3;AT1G63770.2	AT1G63770.7	819	829	yes	no	2	0.064932	83.883	1	1	1	1	1	1	29744000	12912000	22464000	33277000	25103000	21223000
FLGLPLLTDPDMVAR	15	0	1656.89	AT2G43620.1	AT2G43620.1	200	214	yes	yes	2	1.1958e-05	171.62	2	2	2	2	2	2	221690000	168190000	188040000	186550000	193960000	233270000
FLHVVYR	7	0	932.523	AT1G11840.4;AT1G11840.3;AT1G11840.2;AT1G11840.1;AT1G11840.6;AT1G11840.5	AT1G11840.4	18	24	yes	no	2	0.0088366	132.48	1	1	1	1		1	0	33586000	55843000	0	0	0
FLLPISR	7	0	844.517	AT4G36945.1	AT4G36945.1	192	198	yes	yes	2	0.02038	117.7	1	1	1	1	1	1	17809000	19870000	16724000	15557000	20314000	23544000
FLLQLPK	7	0	857.537	AT1G33610.1	AT1G33610.1	122	128	yes	yes	2	0.024182	114.6	1	1	1	1	1	1	107620000	98681000	90177000	135290000	129750000	113530000
FLLSDSFPGNDR	12	0	1366.65	AT2G24270.3;AT2G24270.1;AT2G24270.4;AT2G24270.2	AT2G24270.3	137	148	yes	no	2	7.1045e-05	131.28	1	1	1	1	1	1	46918000	62647000	43623000	46940000	50731000	45837000
FLNVVESR	8	0	962.519	AT2G28100.1	AT2G28100.1	449	456	yes	yes	2	4.77e-05	181.81	1	1	1	1	1	1	121280000	152020000	108670000	103920000	112780000	125720000
FLSEYHR	7	0	950.461	AT2G33530.1	AT2G33530.1	250	256	yes	yes	2	0.0070993	135.82		1		1		1	0	19889000	0	6665400	0	8697000
FLSQVSVR	8	0	934.524	AT5G19110.1;AT5G19110.2	AT5G19110.1	133	140	yes	no	2	0.013627	117.16	1	1	1	1	1	1	21504000	23369000	17641000	19798000	17620000	17966000
FLSVEVSK	8	0	907.501	AT5G11720.1	AT5G11720.1	879	886	yes	yes	2	0.014949	116.88		1	1	1	1	1	0	11751000	0	0	32983000	0
FLYELDLSNNK	11	0	1354.68	AT1G49750.1	AT1G49750.1	223	233	yes	yes	2	2.9605e-27	218.55		1			1	1	0	329530000	0	0	211530000	221340000
FMFPVSR	7	0	882.442	AT1G49740.1	AT1G49740.1	196	202	yes	yes	2	0.033309	97.075	1	1	1			1	67139000	44611000	30644000	0	0	24305000
FNEFEGPVPR	10	0	1190.57	AT4G18670.1	AT4G18670.1	207	216	yes	yes	2	0.021627	88.37	1	1	1	1	1		36841000	50357000	50132000	33039000	37431000	0
FNEFEGTVPK	10	0	1166.56	AT3G24480.1;AT4G13340.1	AT4G13340.1	195	204	no	no	2	0.0078022	107.57	1	1	1	1	1	1	95621000	161300000	112190000	69403000	70728000	81469000
FNFDSFDGSNLLFLGDAELGPSSDGVSR	28	0	2962.36	AT3G15356.1;AT3G16530.1	AT3G16530.1	22	49	no	no	2;3;4	5.4805e-97	318.13	22	8	14	20	23	17	11477000000	4779200000	11083000000	13003000000	13525000000	11426000000
FNKQDFESDFIFGVASSAYQIEGGR	25	1	2811.31	AT5G25980.3;AT5G25980.1;AT5G25980.2	AT5G25980.3	50	74	yes	no	3	0.00023458	69.248			1	1	1		0	0	11944000	19912000	19984000	0
FNTDQYCCR	9	0	1262.48	AT1G75040.1	AT1G75040.1	181	189	yes	yes	1;2	2.0979e-45	256.36	3	1	3	4	3	3	4434100000	6470400000	4708300000	5205200000	5597400000	5515200000
FNYEPDSYFDHEVSVLEMDGQFDR	24	0	2938.24	AT1G32060.1	AT1G32060.1	302	325	yes	yes	3	4.8814e-16	152.13	1	1	1	1		1	44688000	24730000	40112000	21871000	0	29384000
FNYSSGQPAPETITDK	16	0	1753.82	AT5G51820.1	AT5G51820.1	195	210	yes	yes	2	2.2155e-05	131.32	1	1	1	1	1	1	44033000	52441000	39432000	0	48568000	39922000
FPAFPTVMDINQIR	14	0	1647.84	AT2G22230.1	AT2G22230.1	69	82	yes	yes	2	0.00037955	107.83	1					1	9071100	0	0	0	0	0
FPASAFAGNDCLCGSPLSPCK	21	0	2254.98	AT1G33610.1	AT1G33610.1	457	477	yes	yes	2;3	2.7688e-99	254.72	2	2	2	1	2	2	54001000	51437000	81600000	36378000	73173000	62934000
FPASAFVGNDCLCGSPLSPCK	21	0	2283.01	AT1G33600.2;AT1G33600.1;AT1G33590.1;AT1G33590.3;AT1G33590.2	AT1G33590.1	456	476	no	no	2;3	8.4506e-202	318.74	2	2	2	2	2	2	3672100000	3627100000	4075900000	5648800000	5246900000	5221900000
FPELGLR	7	0	830.465	AT4G20860.1	AT4G20860.1	326	332	yes	yes	2	0.016461	120.9	1	1	1	1	1	1	286000000	435060000	371440000	548900000	479650000	424370000
FPFLLVDR	8	0	1005.56	AT2G22230.1;AT5G10160.1	AT2G22230.1	89	96	no	no	2	0.0079967	128.37	1	1	1	1	1	1	36928000	39332000	42455000	28838000	28611000	34242000
FPFNQPMK	8	0	1007.49	AT2G06850.1;AT2G06850.2	AT2G06850.1	185	192	no	no	2	0.017973	110.34	1	1	1		1	1	44564000	39322000	35513000	0	11646000	19451000
FPGGCFVEGEWLSNAFR	17	0	1971.89	AT3G10740.3;AT3G10740.1;AT3G10740.4;AT3G10740.2	AT3G10740.3	265	281	yes	no	2;3	2.6339e-302	391.71	1	2	2	2	2	2	473380000	324180000	456050000	402430000	359960000	362850000
FPGIDQITVGENFSPAR	17	0	1846.92	AT2G31670.1	AT2G31670.1	189	205	yes	yes	2	1.9966e-49	218.5	1	1	1	1	1	1	15126000	16263000	26400000	15431000	17215000	22256000
FPGLSIVSTR	10	0	1075.6	AT4G31140.1	AT4G31140.1	430	439	yes	yes	2	0.0068492	109.48	1	1	1	1	1	1	27519000	29681000	26625000	33984000	38695000	36788000
FPGNPVLVPPPGILPK	16	0	1640.97	AT1G12240.1	AT1G12240.1	240	255	yes	yes	2	2.4478e-05	140.78	1	1	1	1	1	1	31125000	46764000	30469000	23724000	31416000	34480000
FPGPAISAQEDDR	13	0	1401.65	AT2G46570.1	AT2G46570.1	59	71	yes	yes	2	0.0012185	118.9	1	1	1	2	1	1	20042000	26079000	0	9722600	12123000	17041000
FPGTGNLDTGGDFDGAPDIDHLNPR	25	0	2597.18	AT4G25000.1	AT4G25000.1	155	179	yes	yes	3	4.3093e-39	165.34	1	1	1	1	1	1	132720000	128370000	149740000	188940000	201230000	220450000
FPLEIVDAVAK	11	0	1200.68	AT1G76680.1;AT1G76680.2	AT1G76680.1	215	225	yes	no	2	0.0011985	152.86	1	1	1	1	1	1	9306000	8460100	6236700	8790100	6211600	6475700
FPQLKPQEIDGIK	13	1	1511.83	AT2G19760.1	AT2G19760.1	39	51	yes	yes	2;3	2.1403e-16	180.97	2	2	2	2	2	1	80928000	93014000	86328000	88245000	61431000	56478000
FPSLPER	7	0	844.444	AT1G14210.1	AT1G14210.1	225	231	yes	yes	2	0.0061043	148.33	1	1	1	1	1	1	29411000	32984000	28240000	30852000	30822000	29680000
FPSPLPTFTR	10	0	1161.62	AT2G44260.1;AT2G44260.2	AT2G44260.1	31	40	yes	no	2	0.001389	131.11	1	1	1			1	25246000	36739000	29332000	0	0	9440400
FPTVVLQLPSLK	12	0	1340.81	AT4G13340.1	AT4G13340.1	178	189	yes	yes	2	0.00083642	108.47	1	1	1	1		1	4500400	7165000	4192000	4768600	0	3773800
FPVMPAECK	9	0	1077.5	AT2G06850.1;AT2G06850.2	AT2G06850.1	283	291	yes	no	2	0.004859	118.74	2	2	2	1	1	1	71300000	93607000	83847000	39309000	29159000	29247000
FPVPPPECR	9	0	1097.53	AT5G65730.1	AT5G65730.1	283	291	no	no	2	0.0032504	132.08	1	1	1	1	1	1	701460000	769140000	616240000	489940000	557780000	498320000
FPVPPPECSAGI	12	0	1269.61	AT4G37800.1	AT4G37800.1	282	293	yes	yes	1;2	2.2153e-06	176.4	1	2	2	2	2	2	474940000	814320000	705920000	568560000	634740000	533010000
FQDPSIYIGNELLCGK	16	0	1852.9	AT2G34930.1	AT2G34930.1	879	894	yes	yes	2;3	2.8812e-05	139.48	2	2	2	2	2	2	85953000	77058000	96782000	82568000	109140000	97335000
FQDPSIYIGNELLCGKPLPK	20	1	2288.19	AT2G34930.1	AT2G34930.1	879	898	yes	yes	2;3	7.1885e-15	167.88	2	2	2	2	2	2	157120000	117660000	148120000	199200000	173820000	203190000
FQEFGDVEAEIAEVGTER	18	0	2024.93	AT2G26740.1	AT2G26740.1	158	175	yes	yes	2;3	3.535e-39	208.23	2	2	1	2	1	1	57027000	42529000	24425000	70238000	36191000	28632000
FQGLDCFLAGDDVK	14	0	1583.73	AT4G39970.1	AT4G39970.1	218	231	yes	yes	2	0.0001717	97.911	1	1		1	1	1	0	22372000	0	35767000	36697000	32724000
FQIIGGDLHYFR	12	0	1464.75	AT1G72990.3;AT1G72990.4;AT1G72990.1	AT1G72990.3	22	33	yes	no	3	0.017569	47.062				1			0	0	0	9993300	0	0
FQPMGVYSTLWEADDWATR	19	0	2272.03	AT4G37800.1	AT4G37800.1	188	206	yes	yes	2;3	7.3614e-13	188.92	3	3	3	2	4	4	59543000	16563000	58411000	29269000	27732000	57158000
FQTVLNELFK	10	0	1237.67	AT5G02790.1	AT5G02790.1	184	193	yes	yes	2	0.0049745	137.14	1	1	1	1	1	1	23506000	17878000	15980000	30027000	30581000	22396000
FSALGLNTR	9	0	977.529	AT5G64120.1	AT5G64120.1	180	188	yes	yes	2	0.00051903	145.65	1	1	1	1	1	1	340570000	309720000	245460000	287160000	287830000	253730000
FSANHGAK	8	0	830.404	AT3G24170.3;AT3G24170.2;AT3G24170.1	AT3G24170.3	43	50	yes	no	2	0.062088	85.357				1	1		0	0	0	6292200	6639200	0
FSAVGLNTNDLVALSGAHTFGR	22	0	2246.14	AT5G06720.1	AT5G06720.1	182	203	yes	yes	2;3	3.4148e-56	236.17	2	1	1	2	1	2	93527000	80605000	85600000	92360000	71566000	103070000
FSCPIILFQGLEDK	14	0	1665.84	AT5G36210.1	AT5G36210.1	644	657	yes	yes	2	0.022908	67.385	1	1	1			1	10929000	5711000	6401800	0	0	6107200
FSDLLIK	7	0	834.485	AT3G48460.1	AT3G48460.1	370	376	yes	yes	2	0.0406	102.8	1	1	1	1	1	1	290690000	171320000	137820000	400030000	399440000	299220000
FSEIVSGGGK	10	0	979.497	AT3G63140.1	AT3G63140.1	131	140	yes	yes	2	4.2108e-09	163.15	1	1	1	1	1	1	153860000	172730000	147660000	121140000	125960000	118690000
FSENVLDATK	10	0	1122.56	AT5G65620.2;AT5G65620.1;AT5G10540.1	AT5G65620.2	274	283	yes	no	2	0.012788	99.013	1	1	1	1	1	1	40369000	37142000	28320000	39932000	49372000	36314000
FSFAWSR	7	0	899.429	AT5G25980.3;AT5G25980.1;AT5G25980.2	AT5G25980.3	126	132	yes	no	2	0.0061818	146.94	1	1	1	1	1	1	27841000	39306000	34667000	28205000	26812000	23810000
FSGAIPQSFAAISSLQR	17	0	1778.93	AT2G34930.1	AT2G34930.1	845	861	yes	yes	2	2.0925e-05	138.42	1	1	1	1	1	1	62781000	47734000	58424000	83601000	74916000	70741000
FSGDLPDLVCTLR	13	0	1491.74	AT2G19780.1	AT2G19780.1	312	324	yes	yes	2	0.00090482	100.72				1	1		0	0	0	11233000	0	0
FSGNPVLVPPPGIGAK	16	0	1548.87	AT1G62660.1;AT1G62660.4;AT1G62660.3;AT1G62660.2	AT1G62660.1	225	240	yes	no	2	0.0017614	98.156					1	1	0	0	0	0	32556000	30227000
FSGQIPDSFK	10	0	1124.55	AT2G19780.1;AT4G29240.2;AT4G29240.1	AT2G19780.1	145	154	no	no	2	0.0044761	141.25	1	1	1	1	1	1	17461000	36982000	22036000	28853000	29880000	33328000
FSGVIPANIGK	11	0	1101.62	AT5G12940.1	AT5G12940.1	146	156	yes	yes	2	0.00081732	127.68	1	1	1			1	171110000	109370000	79329000	0	0	41413000
FSGVIPK	7	0	746.433	AT1G33590.1;AT1G33590.3;AT1G33590.2	AT1G33590.1	283	289	yes	no	2	0.051633	95.793	1	1	1	1	1	1	5383700000	6130600000	5427900000	6582500000	7071100000	7507800000
FSGVVPK	7	0	732.417	AT1G33600.2;AT1G33600.1	AT1G33600.2	283	289	yes	no	2	0.022734	115.78	1	1	1	1	1	1	1749500000	1581200000	1311500000	1312900000	1403700000	1755600000
FSLAPLVPR	9	0	998.591	AT3G12780.1	AT3G12780.1	150	158	no	no	2	0.0001302	150.17	1	1	1	1	1	1	21204000	27478000	26902000	65423000	68049000	73882000
FSLAWSR	7	0	865.445	AT5G48375.1	AT5G48375.1	105	111	yes	yes	2	0.0013596	173.93	1	1	1	1	1	1	117320000	141600000	127470000	155380000	150200000	154640000
FSLYFLGYEDTTTAPTDPTER	21	0	2423.12	AT1G08110.3;AT1G08110.2;AT1G08110.1;AT1G08110.4	AT1G08110.3	64	84	yes	no	2	9.2106e-35	154.65	1				1	1	7545500	0	0	0	0	7382700
FSPTSIWELANFDETTK	17	0	1984.94	AT1G17860.1	AT1G17860.1	104	120	yes	yes	2	6.311e-117	286.34	1	1	1	1	1	1	175740000	131190000	122740000	178320000	174010000	166610000
FSSIVPVVTLGSISK	15	0	1532.88	AT4G23600.1;AT4G23600.3;AT4G23600.2	AT4G23600.1	231	245	yes	no	2	2.2258e-06	113.65		1	1	1	1	1	0	16959000	0	0	33875000	26279000
FSTAGDIGTANIVLR	15	0	1533.82	AT1G07370.1;AT2G29570.1	AT1G07370.1	169	183	yes	no	2	6.9331e-08	190.53	1		1	1	1	1	29664000	0	30590000	30716000	40470000	28108000
FSTFTQTVQR	10	0	1213.61	AT4G19810.2;AT4G19810.1	AT4G19810.2	76	85	yes	no	2	2.3476e-20	211.35	1	1	1	1	1	1	363350000	431660000	375530000	396930000	330820000	402650000
FSTVIHER	8	0	987.514	AT4G35090.2;AT4G35090.3;AT4G35090.1	AT4G35090.2	103	110	no	no	2	6.6926e-12	201.49	1	1	1	1	1	1	104220000	78370000	82600000	137530000	93819000	120120000
FSTVVHER	8	0	973.498	AT1G20620.5;AT1G20620.1;AT1G20620.6;AT1G20620.2	AT1G20620.5	103	110	yes	no	2	0.000768	168.23	1	1	1	1	1	1	296360000	294400000	271790000	332230000	372000000	360930000
FSTYSTNLR	9	0	1087.53	AT4G23170.1	AT4G23170.1	42	50	yes	yes	2	4.5092e-08	186.13	1	1	1	1	1	1	930020000	911530000	883730000	1633400000	1474400000	1384300000
FSVYLNQACEAK	12	0	1428.67	AT3G07470.3;AT3G07470.2;AT3G07470.1	AT3G07470.3	61	72	yes	no	2	0.00040482	140.49	1	1	1	1	1	1	75229000	75591000	78025000	0	36329000	37874000
FSWESYNEGSPSSNEAGTFVK	21	0	2322.01	AT3G52840.1;AT3G52840.2	AT3G52840.1	433	453	yes	no	2;3	4.6025e-69	290.39	2	2	2	2	2	2	577300000	550350000	545420000	888510000	844840000	954690000
FSWGSFNEATPTANEAGTFAR	21	0	2260.02	AT5G56870.1	AT5G56870.1	433	453	yes	yes	2;3	3.7597e-43	272.72	2	1	2	2	2	2	276120000	114260000	291620000	426580000	462070000	570150000
FSYASHK	7	0	838.397	AT3G03780.3;AT3G03780.2;AT3G03780.1	AT3G03780.3	130	136	yes	no	2	0.055516	94.407				1	1	1	0	0	0	25262000	25316000	23532000
FSYEDIPEDLEDLAQEYR	18	0	2230.99	AT1G62750.1	AT1G62750.1	281	298	yes	yes	2	4.9615e-06	162.72	1	1	1		1	1	17395000	10695000	19087000	0	17248000	16353000
FTDPVTGEVFNK	12	0	1352.66	AT4G29700.1	AT4G29700.1	126	137	yes	yes	2	5.0655e-13	167.93	1	1	1	1	1	1	33800000	49614000	41633000	48877000	50143000	46701000
FTDVSGTVR	9	0	980.493	AT2G04780.2;AT2G04780.1	AT2G04780.2	149	157	yes	no	2	0.00013285	149.91	1	1	1	1	1	1	344550000	530510000	351140000	391350000	389620000	454510000
FTEPQPDYSAFR	12	0	1456.66	AT5G34850.1	AT5G34850.1	398	409	yes	yes	2	1.5763e-26	208.63	1	1	1	1	1	1	394210000	260360000	254290000	661060000	505840000	293590000
FTEQGDAITFESEVDK	16	0	1814.82	AT5G57330.1	AT5G57330.1	198	213	yes	yes	2	1.6306e-101	276.41	1	1	1	1	1	1	154300000	133290000	148460000	191460000	210230000	187440000
FTFQYVGLNEPEK	13	0	1570.77	AT1G31690.1	AT1G31690.1	56	68	yes	yes	2	7.275e-55	249.23	1	1	1	1	1	1	353210000	375150000	345820000	318990000	292810000	275290000
FTGPIPESIGNIK	13	0	1371.74	AT1G49750.1	AT1G49750.1	304	316	yes	yes	2	1.4481e-81	274.5	1	1	1	1	1	1	1703300000	1703400000	1521700000	1062500000	1142800000	1028600000
FTHNIADAPK	10	0	1112.56	AT1G02640.1	AT1G02640.1	629	638	yes	yes	2	0.0043997	119.34		1	1				0	20687000	18914000	0	0	0
FTHPEDK	7	0	872.403	AT1G80600.1	AT1G80600.1	177	183	yes	yes	2	0.03116	108.92	1		1	1	1	1	9089200	0	10921000	16557000	14368000	10886000
FTLPPNLTLK	10	0	1142.67	AT3G14415.1;AT3G14415.3;AT3G14415.2;AT3G14420.3;AT3G14420.2;AT3G14420.1;AT3G14420.4;AT3G14420.5;AT3G14420.6	AT3G14420.3	172	181	no	no	2	0.006456	111.06	1	1	1	1	1	1	0	0	0	18016000	0	15820000
FTMGLFEEPLADLSFANQLGSK	22	0	2414.18	AT5G20950.2;AT5G20950.1;AT5G20950.3	AT5G20950.2	374	395	yes	no	3	0.0046955	45.011			1				0	0	6825200	0	0	0
FTPAPAVAYFSSR	13	0	1412.71	AT1G20160.1;AT1G20160.2;AT1G20160.3	AT1G20160.1	485	497	yes	no	2	2.8949e-07	147.3	1	1	1	1	1	1	61954000	71939000	78107000	72709000	80912000	74974000
FTVDFDVCK	9	0	1129.51	AT3G19620.1	AT3G19620.1	727	735	yes	yes	2	0.017688	100.02	1	1	1	1	1	1	35948000	30391000	25584000	47904000	63366000	31669000
FTYVDIFSIK	10	0	1231.65	AT3G05180.1	AT3G05180.1	279	288	yes	yes	2	0.0032581	123.86	1	1		1	1	1	0	19162000	0	0	37984000	33801000
FVALHILTGK	10	0	1097.66	AT3G05180.1	AT3G05180.1	360	369	yes	yes	2	0.013242	98.233		1	1	1	1	1	0	8374200	10168000	20028000	14200000	9829200
FVAVSTR	7	0	778.434	AT5G11420.1;AT5G25460.1	AT5G25460.1	327	333	no	no	2	0.0020779	172.39	1	1	1	1	1	1	1091500000	1336800000	1297100000	924150000	953260000	1048200000
FVEDAGGENIDK	12	0	1292.59	AT1G65900.2;AT1G65900.1	AT1G65900.2	209	220	yes	no	2	9.6972e-06	138.25	1	1	1	1	1	1	53782000	61295000	55597000	34016000	47894000	41104000
FVEDLNEMLPK	11	0	1333.66	AT5G14780.3;AT5G14780.2;AT5G14780.1	AT5G14780.3	217	227	yes	no	2	0.0017158	111.65						1	0	0	0	0	0	20259000
FVEGPVSGSK	10	0	1005.51	AT3G25530.1;AT3G25530.2;AT3G25530.3	AT3G25530.1	115	124	yes	no	2	0.064589	70.816		1			1	1	0	24280000	0	0	19464000	23411000
FVFDDPPTAA	10	0	1078.5	AT3G28940.1	AT3G28940.1	160	169	yes	yes	1;2	1.2422e-05	150.17	2	1	2	1	2	1	42729000	30939000	32375000	13751000	35360000	10944000
FVFTDGSR	8	0	927.445	AT5G51820.1	AT5G51820.1	553	560	yes	yes	2	0.0037726	141.83	1	1	1	1	1	1	47218000	33113000	48908000	41386000	51797000	70174000
FVIDVANSLSPP	12	0	1257.66	AT4G39330.1	AT4G39330.1	349	360	yes	yes	2	0.0055569	91.318	1	1	1	1	1	1	10887000	9001700	11062000	0	5588200	7382200
FVIFDGPITMDK	12	0	1381.7	AT4G23690.1	AT4G23690.1	79	90	yes	yes	2	0.00015591	125.75	2	2	2	1	2	2	115740000	91704000	131610000	60354000	64571000	95106000
FVLGLSTIK	9	0	976.596	AT4G20430.2;AT4G20430.3;AT4G20430.1	AT4G20430.2	455	463	no	no	2	0.060321	79.474	1	1		1	1	1	6831100	10955000	0	9760700	12805000	11713000
FVLNEQSK	8	0	963.503	AT1G43670.1	AT1G43670.1	18	25	yes	yes	2	0.056938	87.435	1	1	1	1	1		19024000	20965000	17720000	31682000	28468000	0
FVNLPLGR	8	0	914.534	AT2G44260.1;AT2G44260.2	AT2G44260.1	369	376	yes	no	2	0.0097406	123.99	1	1			1		27987000	27176000	0	0	13047000	0
FVNSGTEACMGVLR	14	0	1539.72	AT3G48730.1;AT5G63570.1;AT5G63570.2	AT3G48730.1	158	171	no	no	2	2.1713e-05	137.98	1					1	50958000	0	0	0	0	34794000
FVPGMAFR	8	0	923.469	AT5G56870.1	AT5G56870.1	136	143	yes	yes	2	0.012314	119.22	1	1	1	1	1	1	92541000	58964000	0	72192000	90966000	173600000
FVQGLGSVLSDSSLDK	16	0	1650.85	AT1G63770.7;AT1G63770.4;AT1G63770.6;AT1G63770.5;AT1G63770.3;AT1G63770.2;AT1G63770.1	AT1G63770.7	607	622	yes	no	2	6.4503e-06	170.66	1	1	1	1	1	1	21773000	33853000	34865000	26174000	32056000	29061000
FVQGLGSVLSDSSLDKEFIAK	21	1	2239.17	AT1G63770.7;AT1G63770.4;AT1G63770.6;AT1G63770.5;AT1G63770.3;AT1G63770.2;AT1G63770.1	AT1G63770.7	607	627	yes	no	3	1.5487e-16	161.22	1	1	1	1	1	1	17665000	16854000	21029000	25903000	28879000	21573000
FVSESVEDQTEQVLK	15	0	1736.85	AT3G20390.1;AT3G20390.2	AT3G20390.1	104	118	yes	no	2	7.4523e-91	267.85	1	1	1	1	1	1	426320000	354660000	448110000	422410000	411430000	395570000
FVTAYGQFLK	10	0	1172.62	AT1G68010.1;AT1G68010.2;AT1G68010.3	AT1G68010.1	206	215	yes	no	2	0.046324	90.657		1		1	1	1	0	18113000	0	20711000	14243000	16836000
FVTSPEFPLK	10	0	1163.62	AT4G32520.2;AT4G32520.1	AT4G32520.2	498	507	yes	no	2	0.046254	76.679	1			1	1	1	14128000	0	0	16116000	14001000	14609000
FVTVESAAVAK	11	0	1120.61	AT4G25900.1	AT4G25900.1	283	293	yes	yes	1;2	9.5707e-20	242.39	2	1	2	2	2	2	2475700000	1880700000	2169600000	2549200000	1960800000	2328300000
FVTVESAAVAKPITVNPGK	19	1	1927.08	AT4G25900.1	AT4G25900.1	283	301	yes	yes	2;3	9.4808e-40	178.15	2	2	2	2	2	2	477190000	589750000	819030000	915370000	885860000	929010000
FVVGLDISESALAK	14	0	1447.79	AT2G43910.2;AT2G43910.1;AT2G43910.3	AT2G43910.2	90	103	yes	no	2	6.3725e-14	173.64	1	1	1		1	1	13476000	0	13555000	0	12706000	12862000
FVVTGGYDGK	10	0	1041.51	AT3G45970.2;AT3G45970.1	AT3G45970.2	188	197	yes	no	2	0.00019339	141.2	1	1	1	2	1	1	980390000	916510000	782860000	1336400000	1105000000	932110000
FVWQSFDHPTDTLLTGQSLK	20	0	2319.15	AT1G78830.1	AT1G78830.1	157	176	yes	yes	2;3	1.9626e-228	367.23	2	2	3	3	3	3	2594000000	1762800000	2232500000	3340000000	3358400000	3386400000
FVWQSFDHPTDTLLVGQSLK	20	0	2317.17	AT1G78820.1	AT1G78820.1	157	176	yes	yes	2;3	5.1559e-17	126.91	2	2	2	2	2	2	158700000	122530000	175490000	198930000	148780000	157560000
FVWQSFDSPTDTLLVGQSLK	20	0	2267.15	AT1G78850.1;AT1G78860.1	AT1G78850.1	153	172	no	no	2;3	1.815e-55	223.72	2	2	2	2	2	2	770720000	601990000	634190000	723940000	687080000	786700000
FVYGNYDGR	9	0	1089.49	AT5G59680.1	AT5G59680.1	110	118	yes	yes	2	0.0083841	116.73					1	1	0	0	0	0	0	28853000
FVYLDSYK	8	0	1033.51	AT1G33811.1	AT1G33811.1	279	286	yes	yes	2	0.058131	86.953	1	1	1				30073000	35303000	28895000	0	0	0
FWADFIDK	8	0	1040.5	AT1G78380.1;AT1G17170.1	AT1G78380.1	97	104	yes	no	2	0.040383	94.114	1	1	1	1	1	1	66459000	50541000	58875000	64922000	57815000	68215000
FWEVETKPPPLPSLSTAHVDLIVR	24	1	2730.47	AT4G25900.1	AT4G25900.1	115	138	yes	yes	3;4	4.6874e-38	191.5	2	2	2	2	2	2	137250000	67227000	176700000	175110000	183180000	165820000
FWGLFHPDR	9	0	1173.57	AT3G57260.1;AT3G57260.2	AT3G57260.1	322	330	yes	no	2;3	0.0036715	85.862	2		2	1	2	1	20152000	0	18301000	17664000	31926000	17922000
FYAEEEKNDPEFAK	14	1	1715.77	AT1G79550.2;AT1G79550.1	AT1G79550.2	123	136	yes	no	2;3	8.6105e-62	250.26	2	2	2	2	2	2	95638000	141170000	82271000	134850000	133600000	116640000
FYAISAEFPEFSNK	14	0	1648.78	AT1G56340.2;AT1G56340.1;AT1G09210.1	AT1G09210.1	77	90	no	no	2	2.637e-05	135.8	1	1	1	1	1	1	29695000	35699000	46387000	34312000	30967000	30405000
FYCWDTAGQEK	11	0	1403.58	AT5G20010.1;AT5G55190.1;AT5G20020.1	AT5G20010.1	64	74	yes	no	2	0.0026604	130.66	1	1	1	1	1	1	47105000	63569000	41845000	43077000	39919000	60047000
FYGEVTQQMLK	11	0	1342.66	AT1G32060.1	AT1G32060.1	343	353	yes	yes	2	6.9582e-10	168.27	1		1	1	1	1	48009000	0	56837000	37728000	0	37198000
FYKEEEKNDPEFAK	14	2	1772.83	AT3G12780.1	AT3G12780.1	198	211	yes	yes	2;3	6.9763e-13	166.9	1	2	1	2	2	2	19738000	27952000	30246000	65435000	61644000	75800000
FYLQPLPPTEAAAR	14	0	1572.83	AT4G21280.1;AT4G21280.2	AT4G21280.1	112	125	yes	no	2	0.00036575	123.79	1	1	1	1	1	1	21601000	34371000	21346000	0	27884000	26967000
FYLYNVK	7	0	945.496	AT3G22060.1	AT3G22060.1	146	152	yes	yes	1;2	0.0086277	175.34	1	2	2	2	2	2	107650000	486030000	538120000	612580000	669670000	613370000
FYSETCPEAESIVR	14	0	1686.76	AT2G22420.1	AT2G22420.1	27	40	yes	yes	2	1.3637e-12	162.36	1	1	1	1	1	1	21682000	46671000	25155000	25780000	23185000	25804000
FYTGETVYAFGDGLSYTK	18	0	2017.93	AT5G64570.1;AT5G64570.2	AT5G64570.1	627	644	yes	no	2;3	2.8144e-79	247.69	1	2	1	2	2	2	254740000	255920000	258880000	419550000	508100000	497380000
FYTGKPIYK	9	1	1115.6	AT3G19620.1	AT3G19620.1	613	621	yes	yes	2	0.047837	140.09	1	1	1	1	1	1	59805000	77890000	62859000	87243000	111630000	92497000
FYTLEDLLSVSNPVR	15	0	1751.91	AT5G44130.1	AT5G44130.1	112	126	yes	yes	2	1.0679e-105	333.8	1	1	1	1	1	1	162660000	131160000	154370000	174610000	164450000	198840000
FYVQIDKPGDGAK	13	1	1436.73	AT3G26720.1;AT3G26720.2;AT3G26720.5;AT3G26720.4;AT3G26720.3	AT3G26720.1	838	850	yes	no	2;3	3.3675e-16	212.09	2	2	2	2	2	2	271600000	295250000	272600000	251230000	372960000	381050000
GAAHEVPFSQPAR	13	0	1365.68	AT2G33530.1	AT2G33530.1	435	447	yes	yes	2;3	0.0011694	97.813	1	1	2	2	1	1	70300000	70929000	121460000	38120000	14524000	22420000
GACVQNVLDSVIASLLDDENRK	22	1	2415.21	AT3G26720.1;AT3G26720.2;AT3G26720.5;AT3G26720.4;AT3G26720.3	AT3G26720.1	69	90	yes	no	3	3.3562e-56	218.88	1		1	1			222230000	0	521030000	75541000	0	0
GADFSLANVTK	11	0	1121.57	AT2G44920.2;AT2G44920.1	AT2G44920.2	150	160	yes	no	2	0.010693	91.584		1	1	1	1	1	0	55178000	36337000	43739000	0	0
GADFVIVVAGLDLSQETEDK	20	0	2105.05	AT5G10560.1	AT5G10560.1	499	518	yes	yes	2	7.7384e-08	142.85					1	1	0	0	0	0	8731800	5723300
GADFVIVVAGLDLSQETEDKDR	22	1	2376.18	AT5G10560.1	AT5G10560.1	499	520	yes	yes	2;3	1.6406e-17	171.07	1	1	2	2	4	3	77844000	43973000	86852000	165040000	184460000	103790000
GADSGAVCLDGTLPGYHLHR	20	0	2094.99	AT3G05910.1;AT3G05910.2	AT3G05910.1	60	79	yes	no	2;3;4	5.7712e-84	306.07	4	1	2	3	4	2	2156900000	1261200000	1887300000	2136900000	2043000000	1442100000
GADSVLEVNK	10	0	1030.53	AT4G27520.1	AT4G27520.1	69	78	yes	yes	2	9.9722e-15	194.9	1	1	1	1	1	1	314400000	346370000	333490000	259070000	223820000	231020000
GAELVLFPEGFIGGYPR	17	0	1820.95	AT3G44310.3;AT3G44310.1	AT3G44310.3	57	73	yes	no	2	0.0010485	106.49	1	1	1			1	5075800	7483900	8243200	0	0	10893000
GAETALTALEMASLFEHHLK	20	0	2168.09	AT2G44050.1	AT2G44050.1	208	227	yes	yes	4	0.00039601	72.644		1		1	1	1	0	3678700	0	7158000	5849000	7583300
GAFLEALDSYSR	12	0	1327.64	AT3G54420.1	AT3G54420.1	101	112	yes	yes	1;2	9.9127e-33	218.52	2	2	2	2	2	2	447510000	402230000	440200000	420100000	367630000	363680000
GAFTNNQIWVTR	12	0	1405.71	AT3G43670.1	AT3G43670.1	585	596	yes	yes	2	1.9061e-05	134.68			1	1	1	1	0	0	16921000	19400000	11484000	26816000
GAGHTVPEYK	10	0	1057.52	AT4G12910.1;AT3G25420.1	AT4G12910.1	471	480	yes	no	2	0.0090993	106.42	1	1		1	1	1	0	19051000	0	9982800	16053000	11893000
GAGHTVPEYKPR	12	1	1310.67	AT4G12910.1;AT3G25420.1	AT4G12910.1	471	482	yes	no	2;3	2.3967e-43	236.92	2	2	2	2	2	2	271970000	321180000	310380000	267830000	294300000	294550000
GAGITVFVPTDSAFSDLPSNVNLQSLPAEQK	31	0	3201.62	AT3G46550.1	AT3G46550.1	240	270	yes	yes	3	2.6647e-13	95.212	1			1	1	1	17841000	0	0	38063000	31168000	28557000
GAHLGGVYGLGFADDSHVVSSGEDACIR	28	0	2845.31	AT3G18060.1	AT3G18060.1	575	602	yes	yes	3;4	0.00027624	50.869	2	1	1				36706000	15462000	25220000	0	0	0
GAIDFEYCAK	10	0	1172.52	AT5G23820.1	AT5G23820.1	24	33	yes	yes	2	0.060168	72.23	1		1			1	40479000	0	29198000	0	0	11418000
GAIGAQGHFR	10	0	1012.52	AT4G33810.5;AT4G33810.1;AT4G33810.4;AT4G33810.3;AT4G33810.2	AT4G33810.5	363	372	yes	no	2	2.0496e-11	183.24	1	1	1	1	1	1	151230000	194620000	212050000	150720000	123790000	137010000
GAISVIR	7	0	714.439	AT3G18060.1	AT3G18060.1	492	498	yes	yes	2	0.042651	101.47	1		1	1	1		15987000	0	13758000	19094000	22965000	0
GALGGTCLNVGCIPSK	16	0	1602.79	AT1G48030.5;AT1G48030.4;AT1G48030.3;AT1G48030.2;AT1G48030.1;AT3G17240.2;AT3G17240.3;AT3G17240.1	AT1G48030.5	76	91	no	no	2	3.8622e-28	199.4	1	1	1	1	1	1	0	178070000	0	139050000	132190000	127110000
GALSVGVPGEVAGLFTAWK	19	0	1858	AT4G39640.2;AT4G39640.1	AT4G39640.2	121	139	yes	no	2	0.0020497	75.669	1	1	1	1			14195000	11142000	16632000	5295700	0	0
GAMIFFR	7	0	840.432	AT4G37930.1;AT5G26780.4;AT5G26780.1;AT5G26780.3;AT5G26780.2	AT4G37930.1	293	299	yes	no	2	0.039663	103.41	1	1	1	1	1	1	10040000	7675200	10394000	11517000	9897200	14427000
GANDKPETCPPTDYSR	16	1	1806.78	AT1G75040.1	AT1G75040.1	190	205	yes	yes	2;3	4.9866e-18	184.71	1	2	2	2	2	1	4588300000	7554900000	6040400000	6116400000	5228700000	5878000000
GANFASGAAGIR	12	0	1090.55	AT1G33811.1	AT1G33811.1	108	119	yes	yes	2	0.007257	87.806	1	1	1				281640000	281540000	249500000	0	0	0
GANLWDDGSTHDAVTK	16	0	1685.76	AT3G16420.3;AT3G16420.2;AT3G16420.1	AT3G16420.3	12	27	yes	no	3	0.00018794	95.751		1	1	1	1	1	0	52561000	41021000	90500000	44982000	46199000
GAPFGNVVSFSDGLPEK	17	0	1719.85	AT2G04690.3;AT2G04690.2;AT2G04690.1;AT2G04690.5	AT2G04690.3	67	83	yes	no	2;3	2.2029e-05	180.61	2	3	3	3	4	3	1160700000	1330000000	1377300000	1748400000	1802300000	1720400000
GAPHPPSLLMADTWK	15	0	1619.81	AT4G33010.1;AT2G26080.1	AT4G33010.1	970	984	no	no	3	0.0072462	59.709	1		1		1	1	13089000	0	9619700	0	0	9891500
GAPLTQGCCNGVTNLK	16	0	1688.8	AT2G38530.1	AT2G38530.1	46	61	yes	yes	2	9.2624e-101	266.69	1	1	1	1	1	1	149710000	179760000	135700000	168740000	161320000	139000000
GAQQVNLPVPEGCTDPVAENFDPTAR	26	0	2781.3	AT2G39730.1	AT2G39730.1	439	464	yes	yes	2;3	1.6375e-30	186.75	2	1	2	2	2	1	131250000	101180000	112180000	97592000	103490000	82067000
GASFAVADATLLGAPVESLTLNQQVR	26	0	2627.39	AT1G54010.1	AT1G54010.1	109	134	yes	yes	3	5.1817e-17	149.32	1	1	1	1	1	1	17046000	10066000	17734000	14680000	22173000	15820000
GASHEVPFSQPER	13	0	1439.68	AT1G28110.2;AT1G28110.1	AT1G28110.2	431	443	yes	no	2;3	0.011546	72.434	1	2	2				11751000	17791000	10584000	0	0	0
GASINNLEAGSDGR	14	0	1359.64	AT1G63940.4;AT1G63940.1;AT1G63940.2;AT1G63940.3	AT1G63940.4	271	284	yes	no	2	4.2297e-06	146.16	1	1	1	1	1	1	56187000	74655000	57078000	66628000	73317000	55632000
GASSIDQHFQSTPFEK	16	0	1777.83	AT5G42740.3;AT5G42740.2;AT5G42740.1	AT5G42740.3	270	285	yes	no	2	4.0397e-06	101.32		1	1	1	1		0	19857000	10151000	0	13297000	0
GATILASPDPSHWDVVSPLPSYGR	24	0	2521.26	AT3G16850.1	AT3G16850.1	102	125	yes	yes	3	6.4451e-10	109.75	1	1		1		1	29623000	29607000	0	59767000	0	52059000
GATILNEWEK	10	0	1159.59	AT5G04140.1;AT5G04140.2	AT5G04140.1	1577	1586	yes	no	2	0.00019339	141.2	1		1	1			86839000	0	0	0	0	0
GATLVVSGDGR	11	0	1030.54	AT1G23190.1;AT1G70730.1;AT1G70730.3;AT1G70730.2	AT1G23190.1	54	64	no	no	2	0.0049242	103.19	1	1	1	1	1	1	50634000	6752900	43229000	60407000	64609000	54569000
GAVATDDGR	9	0	860.399	AT4G39640.2;AT4G39640.1	AT4G39640.2	34	42	yes	no	2	0.0065031	129.68	1	1	1	1	1	1	75149000	113280000	55615000	22581000	23752000	21148000
GAVCLDGSAPAYHFDK	16	0	1706.77	AT4G19410.1;AT4G19410.2;AT5G45280.2;AT5G45280.1	AT4G19410.1	36	51	no	no	2;3	6.406e-14	142.54	2	1	2	2	2	2	7488600000	4662200000	7275400000	5980200000	5527600000	5007900000
GAVCLDGSPPAYHLDR	16	0	1726.81	AT4G19420.2;AT4G19420.1;AT4G19420.4;AT4G19420.3	AT4G19420.2	37	52	yes	no	3	0.0022909	60.209	1	1	1	1		1	25979000	49276000	36929000	42495000	0	42744000
GAVCLDGTLPGYHLDR	16	0	1742.84	AT3G62060.1;AT3G62060.2	AT3G62060.1	67	82	yes	no	2;3	7.5689e-13	168.02	2	1	2	2	2	2	165540000	91530000	139120000	203290000	197850000	180710000
GAVCLDGTLPGYHLHPGSGSGANR	24	0	2392.13	AT2G46930.1	AT2G46930.1	65	88	yes	yes	2;3	4.9735e-38	175.27	3	2	3	2	2	3	441810000	383910000	458270000	763610000	706450000	664310000
GAVGVGPMQWDER	13	0	1400.65	AT2G14610.1	AT2G14610.1	42	54	yes	yes	2	0.00036854	106.62	1	2	2	1	1	2	59906000	72064000	48109000	26696000	20080000	81843000
GAYLNYR	7	0	855.424	AT4G20860.1;AT5G44360.1;AT5G44360.2	AT4G20860.1	469	475	yes	no	2	0.024095	114.67	1	1	1	1	1	1	96206000	176540000	136690000	132930000	136630000	193480000
GCCGTGTVETTSLLCNPK	18	0	1953.86	AT3G16370.1	AT3G16370.1	296	313	yes	yes	2;3	1.0727e-165	312.85	1	2	2		2	1	390710000	466210000	387850000	0	141750000	154700000
GCCPPTK	7	0	818.341	AT1G14210.1	AT1G14210.1	45	51	yes	yes	2	0.029401	110.34	1	1	1	1	1	1	33541000	18755000	17973000	18734000	26131000	17746000
GCFVYSDQTLK	11	0	1316.61	AT5G12950.1	AT5G12950.1	783	793	no	no	2	0.019621	81.95	1	1	1			1	15341000	22557000	18059000	0	0	15558000
GCGGFLDSDTLYGLAR	16	0	1700.78	AT5G18860.2;AT5G18860.1	AT5G18860.2	601	616	yes	no	2	0.00067709	118.9	1		1	1	1		21562000	0	19535000	13293000	20135000	0
GCNFAAAASTIQK	13	0	1337.64	AT3G05180.1	AT3G05180.1	109	121	yes	yes	2	3.0157e-27	206.49	1	1	1	1	1	1	97933000	142120000	153930000	192660000	205530000	210060000
GCPQSPMVIGGDSK	14	0	1431.65	AT4G36195.1;AT4G36195.3	AT4G36195.1	441	454	yes	no	2	0.038544	58.132		1	1	1	1	1	0	12483000	10046000	7455800	13193000	13727000
GCPSGGVGVYNPGYWGMNIEEGK	23	0	2427.06	AT3G10740.3;AT3G10740.1;AT3G10740.4;AT3G10740.2	AT3G10740.3	135	157	yes	no	2;3	2.3815e-143	285.43	2	1	3	1	1	2	116450000	43080000	146020000	49897000	40302000	91969000
GCPSGGVGVYNPGYWGMNIEEGKK	24	1	2555.16	AT3G10740.3;AT3G10740.1;AT3G10740.4;AT3G10740.2	AT3G10740.3	135	158	yes	no	3	1.3183e-05	73.981	1			1			50248000	0	0	27524000	0	0
GCTDAVDNGDK	11	0	1150.46	AT3G10850.1	AT3G10850.1	85	95	yes	yes	2	0.037044	76.17					1	1	0	0	0	0	0	10733000
GDALAISR	8	0	801.434	AT5G13690.1	AT5G13690.1	791	798	yes	yes	2	0.005033	136.33	1		1	1	1	1	86970000	0	75786000	96681000	109100000	108410000
GDANEVGASVDNAK	14	0	1345.61	AT4G34480.1;AT4G34480.2;AT4G34480.3	AT4G34480.1	271	284	yes	no	2	3.9041e-19	181.31	1	1	1	1	1	1	136710000	157130000	120460000	148680000	146270000	145700000
GDANVVECSFVASQVTELAFFATK	24	0	2589.24	AT5G09660.2;AT5G09660.1;AT5G09660.5	AT5G09660.2	265	288	yes	no	2;3	2.5323e-12	148.24	1		2	2	1		14999000	0	29833000	26034000	13897000	0
GDETFLDEGSK	11	0	1196.52	AT2G28470.4;AT2G28470.2;AT2G28470.3;AT2G28470.1;AT2G28470.5	AT2G28470.4	488	498	yes	no	2	0.00061947	119.68	1	1	1	2		1	57241000	81314000	0	50269000	0	0
GDFAIDIGR	9	0	962.482	AT4G09320.1	AT4G09320.1	103	111	yes	yes	2	0.00031277	147.04	1	1	1	1	1	1	144650000	0	0	73926000	68355000	80688000
GDFYAGTCPNVEQIVR	16	0	1824.85	AT4G37530.1;AT4G37530.2	AT4G37530.1	29	44	yes	no	2	1.6837e-13	207.88	1	1	1	1	1	1	210030000	204760000	231080000	269200000	283850000	260420000
GDILAVGVTEK	11	0	1100.61	AT4G30920.1	AT4G30920.1	93	103	no	no	2	0.0039328	105.98	1	1		1	1	1	19191000	28416000	0	26763000	25127000	32083000
GDILVVGVTEK	11	0	1128.64	AT2G24200.1;AT2G24200.2;AT2G24200.3	AT2G24200.1	32	42	yes	no	2	0.012767	111.61	1	1	1		1	1	53446000	52128000	51984000	0	76036000	67809000
GDISNTDCSTCIQDAAK	17	0	1854.77	AT5G48540.1	AT5G48540.1	82	98	yes	yes	2	3.8147e-74	293.82	1	1	1	1	1	1	2016500000	2195100000	1762000000	1875800000	2113000000	1865800000
GDKEQQFK	8	1	978.477	AT5G57560.1	AT5G57560.1	123	130	yes	yes	2	1.3257e-29	236.09	1	1	1	1	1	1	45565000	72382000	43909000	28031000	26982000	25385000
GDLASESILLGDTK	14	0	1417.73	AT1G79720.1	AT1G79720.1	231	244	yes	yes	2	7.9688e-19	207.88	1	1	1	1	1	1	388570000	355010000	397040000	492160000	428140000	419460000
GDLAVQTGR	9	0	915.477	AT5G63310.1	AT5G63310.1	185	193	yes	yes	2	0.00013138	150.05	1	1	1	1	1	1	89082000	130050000	131040000	94174000	93521000	102070000
GDLAVTVGR	9	0	886.487	AT4G11010.1	AT4G11010.1	190	198	yes	yes	2	0.0078407	110.12	1	1	1	1	1	1	45561000	49150000	56306000	53033000	0	67099000
GDLLDAGVNR	10	0	1028.53	AT2G38010.3;AT2G38010.1;AT2G38010.2	AT2G38010.3	171	180	yes	no	2	3.0426e-07	144.12	1		1	1	1	1	117600000	0	67130000	0	0	0
GDLSALCVWPDQIR	14	0	1628.8	AT1G11190.1	AT1G11190.1	63	76	yes	yes	2	0.014252	69.721			1		1		0	0	9049000	0	12344000	0
GDLSNNDCYNCVSR	14	0	1672.66	AT2G33330.1	AT2G33330.1	94	107	yes	yes	2	0.00020796	126.19	1	1	1	1	2		21124000	20070000	17311000	0	16166000	0
GDLSPEVCSNCVAFSVDEALTR	22	0	2425.09	AT4G23170.1	AT4G23170.1	87	108	yes	yes	2;3	9.8251e-44	188.47	2	2	2	2	2	2	213310000	144900000	210260000	340100000	349970000	367750000
GDQSSQFGPK	10	0	1049.48	AT2G28100.1	AT2G28100.1	361	370	yes	yes	2	0.00018731	130.56	1	1	1	1	1	1	0	0	90895000	101750000	113230000	0
GDSLTYK	7	0	782.381	AT1G68560.1;AT3G45940.1	AT1G68560.1	249	255	yes	no	2	0.035028	106.42	1	2	1	1	1	1	143830000	169470000	144960000	93167000	100120000	96606000
GDSMVFPQGLLHFQLNSGK	19	0	2074.03	AT5G20630.1	AT5G20630.1	138	156	yes	yes	2;3	6.1956e-15	212.11	4	4	4	4	4	4	625510000	556040000	726810000	537230000	588420000	743570000
GDVEAQLSPILR	12	0	1296.7	AT1G25230.2;AT1G25230.1;AT1G25230.3	AT1G25230.2	61	72	yes	no	2	0.003044	97.284	1			1			44268000	0	0	42127000	0	0
GDVTILPTLVVNNR	14	0	1509.85	AT2G14740.2;AT2G14740.1;AT2G14720.2;AT2G14720.1;AT3G52850.1	AT2G14740.2	369	382	yes	no	2	0.033389	63.212	1	1			1	1	8285600	7711300	0	0	0	8820800
GEALPDK	7	0	728.37	AT5G67360.1	AT5G67360.1	361	367	yes	yes	2	0.056639	94.006					1		0	0	0	0	818680000	0
GEALSLHTNTESSGVR	16	0	1656.81	AT5G56870.1	AT5G56870.1	590	605	yes	yes	2;3	5.6717e-101	343.38	2	2	2	2	2	3	808470000	842500000	832280000	1387300000	1329100000	1539300000
GEALSVHTLAGSSTVEWK	18	0	1870.94	AT4G26140.9;AT4G26140.1;AT4G26140.7;AT4G26140.3;AT4G26140.2;AT4G26140.6	AT4G26140.9	616	633	yes	no	2;3	2.0385e-39	210.38	2	2	2	2	2	2	84162000	49411000	76432000	170300000	65850000	207580000
GEAMSLHTLAGSSAVK	16	0	1557.78	AT3G52840.1;AT3G52840.2	AT3G52840.1	590	605	yes	no	2;3	0	357.99	4	3	3	4	3	5	222070000	118370000	167980000	239460000	203780000	256540000
GEAVDAEK	8	0	817.382	AT3G26720.1	AT3G26720.1	979	986	yes	yes	2	0.039778	135.84	1	1	1	1	1	1	46558000	51295000	42904000	28364000	26303000	52239000
GEAVPVDFEGPILVCTR	17	0	1857.93	AT1G16080.1	AT1G16080.1	83	99	yes	yes	2	0.0012412	124.38	1	1	1	1	1	1	33547000	28779000	28080000	38115000	29030000	43926000
GECEIGPDFPASSCNR	16	0	1794.73	AT3G14067.1	AT3G14067.1	166	181	yes	yes	2	1.4343e-12	162.49	1	1	1	1	1	1	24330000	33706000	26425000	15375000	19054000	25203000
GECESGSDFDSK	12	0	1316.48	AT2G05920.1	AT2G05920.1	158	169	yes	yes	2	1.0088e-05	137.85	1	1	1	1	1	1	60837000	96045000	55315000	41092000	48339000	47875000
GEDTGLATVDSSEWVSK	17	0	1779.82	AT2G28470.4;AT2G28470.2;AT2G28470.3;AT2G28470.1;AT2G28470.5	AT2G28470.4	596	612	yes	no	2;3	1.2907e-37	252.42	2	1	2	2	1	2	1116100000	1590600000	1470600000	1222600000	1191700000	1246500000
GEDTLQVWSDR	11	0	1304.6	AT3G43670.1	AT3G43670.1	614	624	yes	yes	2	2.7406e-05	145.25	1	1	1		1		23540000	26497000	23292000	0	0	0
GEEFEYSAISCR	12	0	1446.61	AT4G23500.1	AT4G23500.1	53	64	yes	yes	2	2.751e-06	145.34	1	1	1	1	1	1	27711000	35559000	15935000	26879000	25206000	23628000
GEEGKPVEGADVYVGGR	17	1	1717.83	AT2G15620.1	AT2G15620.1	526	542	yes	yes	3	0.00082079	78.705	1	1	1	1	1	1	24498000	40277000	25497000	22461000	29007000	32653000
GEEGPGWSTTWK	12	0	1333.59	AT4G34260.1	AT4G34260.1	679	690	yes	yes	2	2.8564e-06	145.23	1	1	1	1	1	1	45392000	72858000	40445000	29090000	26548000	42286000
GEELGPLAGVLIGVK	15	0	1450.84	AT3G25660.1	AT3G25660.1	102	116	yes	yes	2	0.035587	74.944	1	1	1	1	1	1	0	5141500	4358100	4685700	5577400	5051300
GEFDPDNFFR	10	0	1242.53	AT2G34790.1	AT2G34790.1	513	522	yes	yes	2	0.00034172	135.83	1	1	1	1	1	1	267130000	309270000	283940000	150610000	143300000	164470000
GEIAAIILEPVVGNSGFITPKPEFIEGIR	29	1	3065.68	AT3G48730.1	AT3G48730.1	243	271	yes	yes	3	1.8698e-16	134.2	1	1	1	1	1	1	39532000	17176000	26258000	39022000	36456000	27290000
GEIDAELTIVMSSISLACK	19	0	2036.02	AT3G54050.2;AT3G54050.1	AT3G54050.2	94	112	yes	no	2	0.00057311	85.837				1			0	0	0	7376400	0	0
GEIGFTEK	8	0	879.434	AT3G10520.1	AT3G10520.1	2	9	yes	yes	1;2	0.019547	82.529	2	1	1		2	2	31082000	23422000	14845000	0	50535000	27629000
GEIGGISYGTQTLR	14	0	1450.74	AT2G15220.1	AT2G15220.1	41	54	yes	yes	2	8.8105e-35	209.8	1	1	1	1	1	1	60228000	63322000	69573000	100630000	101880000	107140000
GEIWVNGESIGR	12	0	1315.65	AT5G63800.1	AT5G63800.1	645	656	yes	yes	2	1.2448e-09	160.53	1	2	1	1	1	1	81490000	0	73262000	172600000	159410000	112830000
GELIGEILR	9	0	998.576	AT1G76080.1	AT1G76080.1	286	294	yes	yes	2	5.4369e-05	157.34	1	1	1	1	1	1	37428000	40821000	33692000	28696000	29058000	26738000
GENVDVDPSLVFENPR	16	0	1785.85	AT4G18670.1	AT4G18670.1	62	77	yes	yes	2	0.00077786	115.57	1	1	1			1	26765000	32179000	21596000	0	0	16057000
GEQSIINIGHGHLK	14	0	1501.8	AT5G13980.1;AT5G13980.2;AT5G13980.3	AT5G13980.1	589	602	yes	no	3	6.3209e-05	97.86	1	1	1	1	1	1	76432000	110860000	104180000	100150000	127740000	0
GESEDPIFER	10	0	1177.53	AT3G20820.1	AT3G20820.1	74	83	yes	yes	2	1.5293e-26	214.12	1	1	1	1	1	1	2050600000	2270000000	2376900000	1417900000	1390100000	1238900000
GESEDPLFQK	10	0	1148.54	AT5G12940.1	AT5G12940.1	81	90	yes	yes	2	4.2539e-09	163.04	1	1	1	1	1	1	104530000	130010000	102950000	27780000	24859000	24643000
GESGGLFR	8	0	821.403	AT1G21670.1	AT1G21670.1	524	531	yes	yes	1;2	0.0014444	162.07	2	2	2	2	2	2	1166100000	1378200000	1164200000	1778000000	1959800000	1890600000
GESLSLHSLSGSSSVEWAEGAFVAQK	26	0	2662.29	AT3G13750.1	AT3G13750.1	598	623	yes	yes	2;3	1.5966e-77	300.01	1	1	1	1	2	2	82508000	58618000	71587000	159600000	178140000	170470000
GESSVTGPVVR	11	0	1086.57	AT1G21750.2;AT1G21750.1	AT1G21750.2	204	214	yes	no	2	0.0048711	120.12	1	1	1	1	1	1	18085000	22583000	18432000	21598000	25936000	24158000
GETIPLPSWLTEEDVAYFVSK	21	0	2380.18	AT2G26740.1;AT2G26750.1	AT2G26740.1	202	222	yes	no	2;3	4.2089e-28	171.91	2	2	1	1	1	1	9881300	12717000	10939000	15846000	10875000	14567000
GETLIDGVSQTLDLIR	16	0	1728.93	AT5G47760.1;AT5G47760.2	AT5G47760.1	32	47	yes	no	2	0.00032444	128.28		1				1	0	2468300	0	0	0	4419900
GETPETAVVEEK	12	0	1287.62	AT4G20260.9;AT4G20260.8;AT4G20260.7;AT4G20260.3;AT4G20260.2;AT4G20260.10;AT4G20260.1;AT4G20260.4	AT4G20260.9	175	186	yes	no	2	2.6439e-09	159.83	1	1	1	1	1	1	35419000	40733000	47932000	30346000	37896000	34310000
GEVFVFPR	8	0	949.502	AT3G62020.2;AT3G62020.1	AT3G62020.2	114	121	yes	no	2	0.0051405	135.87	1	1	1	1	1	1	199330000	284880000	219970000	178840000	173350000	226220000
GEVLTALAVFGHDETLK	17	0	1798.95	AT4G33090.1	AT4G33090.1	667	683	yes	yes	2;3	4.7485e-10	119.69	1	1	1	3	2	2	13325000	12369000	16903000	35368000	22831000	31196000
GFDEDVR	7	0	836.366	AT3G54660.1	AT3G54660.1	298	304	yes	yes	2	0.02038	117.7		1	1	1	1	1	0	29412000	38593000	32451000	32074000	34281000
GFDFIDK	7	0	840.402	AT4G11290.1	AT4G11290.1	99	105	yes	yes	2	0.011155	128.48	1	1	1	1	1	1	193410000	314230000	228890000	188500000	214680000	213130000
GFDGADPIDPNSILVEDCDILVPAALGGVINR	32	0	3321.66	AT5G18170.1	AT5G18170.1	265	296	yes	yes	3	5.7749e-14	95.741	1		1	1	1	1	24894000	0	24364000	19447000	27403000	19005000
GFEAGGQNTPSNIWPWSIVGDHSSIYVATDR	31	0	3360.58	AT3G10740.3;AT3G10740.1;AT3G10740.4;AT3G10740.2	AT3G10740.3	84	114	yes	no	3	1.9445e-43	181.64	1	1	1		1	1	48377000	21107000	51083000	0	37277000	51245000
GFENTKPVLETIK	13	1	1474.8	AT3G23600.2;AT3G23600.1	AT3G23600.2	102	114	yes	no	2;3	7.5427e-80	272.65	2	2	2	2	2	2	90051000	78873000	75820000	78785000	75680000	75727000
GFEVIDQAK	9	0	1005.51	AT1G14540.1	AT1G14540.1	95	103	yes	yes	2	0.016647	91.516	1	1	1	1	1	1	26552000	30327000	0	13878000	12770000	0
GFEVIDTIK	9	0	1020.55	AT5G19890.1	AT5G19890.1	101	109	yes	yes	1;2	0.0083841	152.47		1	1	2	2	2	0	18814000	18812000	151270000	141330000	141730000
GFEVVDEIK	9	0	1034.53	AT2G18150.1;AT2G18140.1	AT2G18150.1	110	118	yes	no	2	0.041549	80.438		1	2		1	1	0	26473000	34686000	0	25434000	16377000
GFFEVTHDISNLTCADFLR	19	0	2241.05	AT1G20620.5;AT1G20620.1;AT1G20620.6;AT1G20620.2;AT4G35090.2;AT4G35090.3;AT4G35090.1	AT1G20620.5	73	91	no	no	3	2.5686e-131	291	1	1	1	1	1	1	182430000	114190000	168130000	209780000	228630000	205730000
GFGAQGGSTER	11	0	1065.48	AT4G01900.1	AT4G01900.1	108	118	yes	yes	2	0.0017927	118.18				1	1	1	0	0	0	11738000	0	7796900
GFGDINDNHVGININSVTSVVAEK	24	0	2498.24	AT5G03350.1	AT5G03350.1	152	175	yes	yes	2;3	2.5685e-197	316.93	2	2	3	2	2	2	850310000	748640000	993620000	558330000	533800000	571290000
GFGFIDAIK	9	0	966.517	AT1G05260.1	AT1G05260.1	98	106	yes	yes	2	0.02434	94.302	1	1	1	1	1	1	248480000	224870000	260090000	211740000	197870000	212840000
GFGFVNFENADDAAR	15	0	1628.72	AT4G34110.1	AT4G34110.1	256	270	yes	yes	2	1.8473e-05	143.79	1	1		1			26404000	16821000	0	9746800	0	0
GFGHIGVTVDDVHK	14	0	1479.75	AT1G08110.3;AT1G08110.2;AT1G08110.1;AT1G08110.4	AT1G08110.3	121	134	yes	no	3	5.858e-20	150.21	1	1	1	1	1	1	64490000	49184000	49751000	67883000	53142000	55796000
GFGSGVNNWIVHMEGGGWCTDVASCNER	28	0	3095.31	AT4G19410.1;AT4G19410.2	AT4G19410.1	52	79	yes	no	3	8.4294e-16	128.59	1	1	1	1	1	1	67121000	11628000	66821000	23198000	26969000	30956000
GFHIDGCQASVEAK	14	0	1517.69	AT2G06850.1;AT2G06850.2	AT2G06850.1	225	238	yes	no	2;3	1.4718e-42	263.74	2	2	2	2	2	2	833270000	891740000	974090000	256060000	295690000	220310000
GFIFGVASSAYQVEGGR	17	0	1743.86	AT5G26000.2;AT5G26000.1	AT5G26000.2	46	62	yes	no	2	2.0168e-101	267.75	1	1	1	1	1	1	592810000	505230000	572020000	802580000	854920000	747020000
GFIPVDER	8	0	931.476	AT4G16155.1;AT3G16950.1;AT3G16950.2	AT4G16155.1	374	381	yes	no	2	0.039025	94.662	1	1	1	1	1	1	21067000	37733000	29132000	21397000	26457000	26225000
GFLLGNPDISNPDDWR	16	0	1814.86	AT4G15100.1	AT4G15100.1	223	238	yes	yes	2	0.0018261	110.08				1		1	0	0	0	19227000	0	20070000
GFLNSDQTLYTNLVTR	16	0	1840.93	AT2G22420.1	AT2G22420.1	261	276	yes	yes	2	1.0864e-05	132.59				1		1	0	0	0	0	0	9952600
GFNVIDNIK	9	0	1018.54	AT5G05340.1	AT5G05340.1	104	112	yes	yes	2	0.0015314	138.83	1	1	1	1	1	1	284660000	374760000	345980000	521530000	518460000	570630000
GFNVVDNIK	9	0	1004.53	AT5G06720.1	AT5G06720.1	106	114	yes	yes	1;2	0.0090438	126.24	2	2	2	2	2	2	454220000	522880000	414610000	442020000	433830000	381870000
GFPGTHEFLLLDEGK	15	0	1658.83	AT3G55800.1	AT3G55800.1	231	245	yes	yes	2;3	5.634e-53	236.7	2	2	2	2	2	2	633310000	420700000	533770000	702780000	599660000	647760000
GFPVIDR	7	0	802.434	AT3G49120.1;AT3G32980.1;AT3G49110.1	AT3G49120.1	106	112	yes	no	2	0.027593	111.81	1	1	1	1	1	1	181840000	128010000	101990000	104680000	109790000	108280000
GFPYDLPPWSVSILPDCK	18	0	2090.02	AT3G52840.1;AT3G52840.2;AT5G56870.1	AT5G56870.1	391	408	no	no	2;3	0.00063113	138.55	2	2	2	2	2	2	87667000	67291000	86299000	120880000	124130000	125190000
GFQMASGGGFSSK	13	0	1259.56	AT2G05920.1	AT2G05920.1	184	196	yes	yes	2	2.3662e-05	124.67	1	1	1	1	1	1	21455000	30941000	25115000	13989000	13961000	18656000
GFSGGYHYDTR	11	0	1258.54	AT1G17030.1;AT2G47010.1;AT2G47010.2;AT2G47010.3	AT2G47010.1	266	276	no	no	2	1.9934e-11	174.41	1	1	1	1	1	1	13113000	22495000	19333000	18347000	18763000	26016000
GFSGPVNYYR	10	0	1158.55	AT2G26740.1	AT2G26740.1	227	236	yes	yes	2	0.0059304	137.18			1	1	1	1	0	0	13111000	21596000	17352000	17217000
GFTEVAEK	8	0	879.434	AT3G26380.1;AT3G26380.2	AT3G26380.1	125	132	yes	no	2	0.0025498	147.16	1	1	1	1	1	1	305880000	416240000	411440000	522030000	555130000	483430000
GFTPQDVVALSGAHTLGVAR	20	0	1995.05	AT4G33420.1;AT4G33420.2	AT4G33420.1	189	208	yes	no	2;3	6.8802e-12	154.74	1	1	1	1	2	2	59616000	61615000	85596000	103430000	115910000	152140000
GFVEEDFAK	9	0	1040.48	AT4G37930.1	AT4G37930.1	440	448	yes	yes	2	0.0089558	114.28	1	1	1	1	1	1	238120000	343730000	269190000	237120000	268480000	290680000
GFVFGTASSAFQHEGAVK	18	0	1838.9	AT1G26560.1	AT1G26560.1	40	57	yes	yes	2;3	9.2775e-11	152.4	2	1	1	1	2	2	147240000	74028000	73777000	55114000	96969000	97407000
GFVFGTATSAYQVEGETHQDGR	22	0	2356.07	AT3G18080.1	AT3G18080.1	47	68	yes	yes	3	1.4265e-84	212.35	1	1	1				68845000	85549000	84529000	0	0	0
GFVISDWQGIDR	12	0	1391.68	AT5G20950.2;AT5G20950.1;AT5G20950.3	AT5G20950.2	300	311	yes	no	2	7.6241e-17	176.38	1	1	1			1	61900000	38474000	40008000	0	0	26386000
GFVPFSDNFR	10	0	1184.56	AT1G78850.1;AT1G78860.1	AT1G78850.1	52	61	no	no	2	0.00021259	140.5	1	1	2	2	1	2	1673900000	1919500000	1957700000	1696500000	1521800000	1617300000
GGADLGNGDTTCDSYR	16	0	1657.66	AT5G25980.3;AT5G25980.1;AT5G25980.2	AT5G25980.3	92	107	yes	no	2	5.5373e-272	375.57	1	1	1	1	1	1	124010000	184430000	113340000	112350000	109050000	97095000
GGADLGNGDTTCDSYTLWQK	20	0	2157.93	AT5G26000.2;AT5G26000.1	AT5G26000.2	80	99	yes	no	2;3	2.5307e-99	259.27	2	2	2	2	1	1	124960000	186240000	162880000	145070000	102230000	109100000
GGADVTVASVENQVGVDACHGIK	23	0	2282.1	AT1G53280.1;AT1G53280.2	AT1G53280.1	78	100	yes	no	3	0.002	50.255		1			1		0	17328000	0	0	15065000	0
GGAFTGEISVEQLK	14	0	1434.74	AT2G21170.2;AT2G21170.3;AT2G21170.1	AT2G21170.2	122	135	yes	no	1;2	6.473e-19	221.5	2	1	1	1	1	2	357970000	287730000	305410000	391070000	369820000	374030000
GGAGLEVVQGK	11	0	1013.55	AT3G16400.2;AT3G16400.1;AT3G16390.2;AT3G16390.1;AT2G33070.2;AT2G33070.1;AT2G33070.3	AT3G16400.2	320	330	no	no	2	1.0717e-11	180.34	1	1	1	1	1	1	91051000	103790000	93076000	109100000	114440000	116870000
GGAIDDSVITK	11	0	1074.56	AT1G11860.1;AT1G11860.2;AT1G11860.3	AT1G11860.1	127	137	yes	no	2	0.0098568	92.732	1	1	1	1	1	1	570040000	607360000	560930000	617330000	614540000	577480000
GGAQLYVPPGK	11	0	1085.59	AT3G16850.1	AT3G16850.1	73	83	yes	yes	2	0.0095573	93.143						1	0	0	0	0	0	17290000
GGAYEESGR	9	0	924.394	AT3G26380.1;AT3G26380.2	AT3G26380.1	165	173	yes	no	2	5.8572e-06	169.06	1	1	1	1	1	1	128810000	187200000	131480000	319530000	376460000	196960000
GGCVQGMK	8	0	835.368	AT4G12880.2;AT4G12880.1	AT4G12880.2	75	82	yes	no	2	0.040262	94.163	1	1	1	1	1	1	81898000	65345000	79499000	40381000	43991000	64288000
GGDVSWHIHDER	12	0	1406.63	AT1G11860.1;AT1G11860.2;AT1G11860.3	AT1G11860.1	170	181	yes	no	2;3	4.0066e-17	181.53	2	2	1	2	2	2	164380000	56083000	56990000	149100000	155700000	184340000
GGDVWDDGGAYDNVK	15	0	1566.66	AT3G16470.1	AT3G16470.1	166	180	yes	yes	2	7.6039e-08	150.09	1	1	1	1	1	1	75689000	103810000	83828000	70691000	72636000	83975000
GGEEWDDGGAYENVK	15	0	1624.66	AT3G16470.1;AT3G16470.3;AT3G16470.4;AT3G16470.2	AT3G16470.1	12	26	yes	no	2	0.0015062	84.289	1	1	1	1	1	1	107260000	88446000	108180000	85184000	83851000	141690000
GGGAASYGVVLGYK	14	0	1297.67	AT1G30720.1	AT1G30720.1	229	242	yes	yes	2	0.00011097	130.98	1	1	1	1	1	1	32031000	59964000	53536000	92504000	87253000	96226000
GGGIGGGIGK	10	0	771.424	AT3G23450.4;AT3G23450.3;AT3G23450.2;AT3G23450.1;AT4G14301.1	AT3G23450.4	127	136	yes	no	1;2	0.022601	92.47	2	2	2				1079900000	1175800000	1040000000	0	0	0
GGGLTLAGR	9	0	800.45	AT1G73260.1	AT1G73260.1	53	61	yes	yes	2	0.027893	92.491	1	1	1	1	1	1	19456000	19936000	18820000	16221000	17179000	16940000
GGGLTMSNLK	10	0	976.501	AT1G17860.1	AT1G17860.1	53	62	yes	yes	1;2	2.2059e-11	186.67	2	2	2	2	2	2	293570000	401530000	350750000	347370000	375990000	487130000
GGGPTHLAILSQPPDTIHGQLR	22	0	2264.2	AT2G42600.3;AT2G42600.2;AT2G42600.1	AT2G42600.3	641	662	yes	no	3;4	0.001551	54.668						2	0	0	0	0	0	32450000
GGGSVIAFVK	10	0	933.528	AT1G11840.4;AT1G11840.3;AT1G11840.2;AT1G11840.1;AT1G11840.6;AT1G11840.5	AT1G11840.4	120	129	yes	no	2	0.009981	103.83	1	1					86266000	0	0	0	0	0
GGGVGGGIGK	10	0	757.408	AT3G23450.4;AT3G23450.3;AT3G23450.2;AT3G23450.1	AT3G23450.4	137	146	yes	no	1;2	0.0089566	105.04	2	2	2				501540000	456890000	435950000	0	0	0
GGHELSLATGNAGGR	15	0	1395.69	AT1G08830.2;AT1G08830.1	AT1G08830.2	128	142	yes	no	2;3	4.0894e-53	310.69	2	2	2	2	2	2	825390000	771990000	752520000	793680000	730280000	823760000
GGHELSLTTGNAGGR	15	0	1425.7	AT2G28190.1	AT2G28190.1	191	205	yes	yes	2;3	5.5684e-19	240.41	2	2	2	2	2	2	302320000	250920000	300730000	239930000	216420000	194490000
GGIGVIQIDEAALR	14	0	1410.78	AT3G03780.3;AT3G03780.2;AT3G03780.1;AT5G17920.2;AT5G17920.1	AT5G17920.2	597	610	no	no	2	2.7375e-08	195.36	1	1	1	1	1	1	844180000	693090000	737220000	926430000	992240000	854240000
GGIPVLFPQYSNTGPLPSHGFVR	23	0	2439.27	AT4G25900.1	AT4G25900.1	90	112	yes	yes	3	0.01509	37.896						1	0	0	0	0	0	51528000
GGIVPVVFQR	10	0	1070.62	AT1G20190.2;AT1G20190.1	AT1G20190.2	83	92	yes	no	2	0.021095	88.942	1	1	1	1	1	1	103930000	152470000	125170000	69413000	57310000	82735000
GGLDFTK	7	0	736.376	ATCG00490.1	ATCG00490.1	195	201	yes	yes	2	0.015977	121.29	2	2	2	2	2	2	5918500000	10137000000	5661000000	6007700000	5951100000	5259700000
GGLDFTKDDENVNSQPFMR	19	1	2168.98	ATCG00490.1	ATCG00490.1	195	213	yes	yes	2;3	1.1279e-258	467.69	4	4	4	4	4	4	2763100000	1994100000	2120300000	1903600000	1828900000	2457500000
GGMFINSCFDHCQSALEETWLSPTSPR	27	0	3126.36	AT5G23870.4;AT5G23870.1;AT5G23870.2;AT5G23870.3	AT5G23870.4	338	364	yes	no	3	1.2436e-06	53.089						1	0	0	0	0	0	16187000
GGNNILVICDTWTPAGEPIPTNK	23	0	2466.22	AT5G35630.3;AT5G35630.2;AT5G35630.1	AT5G35630.3	142	164	yes	no	2;3	9.7701e-12	185.12	1	1				1	11916000	12602000	0	0	0	10990000
GGNPDSNTLISDTTTVICLDDYHSLDR	27	0	2978.36	AT1G32060.1	AT1G32060.1	83	109	yes	yes	3	2.1578e-22	158.67	1	1	1	1	1	1	232850000	159900000	197880000	147100000	157840000	140240000
GGNWILSDGLLR	12	0	1299.69	AT1G09010.1	AT1G09010.1	354	365	yes	yes	2	0.011511	79.974	1	1	1	1			9303100	7425500	7837100	0	0	0
GGPYIGLVTVIATEENAFLR	20	0	2119.13	AT4G24350.1;AT4G24350.2	AT4G24350.1	44	63	yes	no	2;3	2.0985e-70	295.32	2	1	2	1	2	2	168920000	34586000	106490000	33344000	141090000	66362000
GGQDPALDSEYAANLK	16	0	1647.77	AT1G05260.1	AT1G05260.1	212	227	yes	yes	2	6.4105e-101	270.32	1	1	1	1	1	1	279510000	409830000	367070000	302900000	308160000	288080000
GGQFVTLIR	9	0	989.566	AT5G44130.1	AT5G44130.1	44	52	yes	yes	2	1.2931e-10	196.25	1	1	1	1	1	1	303870000	385760000	306980000	361870000	370220000	349910000
GGQPCPYDIVQESSEVDEGIPVK	23	0	2502.16	AT1G73260.1	AT1G73260.1	62	84	yes	yes	2	2.0307e-30	161.08	1	1		1		2	15117000	15831000	0	26038000	0	22076000
GGRPEFFFDDGAYPEQVDWIGQK	23	1	2657.22	AT2G37660.1	AT2G37660.1	164	186	yes	yes	3	1.0129e-08	107.21	1		1	1	1	1	28563000	0	29090000	23481000	16975000	23219000
GGRPEFIFEDGQYPEQVDWIGQK	23	1	2694.27	AT5G02240.1	AT5G02240.1	92	114	yes	yes	3	2.872e-10	132.83		1		1	1	1	0	51065000	0	71404000	61603000	67600000
GGSIQGITISGVYLEK	16	0	1620.87	AT5G41870.1	AT5G41870.1	327	342	yes	yes	2	9.1315e-06	101.33	1	1	1	1	1	1	20528000	24675000	28181000	82351000	75421000	48106000
GGSLVNYYMYHGGTNFDR	18	0	2049.9	AT5G56870.1	AT5G56870.1	286	303	yes	yes	2;3	0.00085578	69.108		1			1	2	0	16050000	0	0	17413000	32728000
GGSQYEFIK	9	0	1027.5	AT1G13900.1	AT1G13900.1	417	425	yes	yes	2	0.0072273	121.67	1	1	1	1	1	1	47398000	39792000	42257000	0	38817000	47750000
GGSSIDLASQQWTYQVGLK	19	0	2037.02	AT2G28470.4;AT2G28470.2;AT2G28470.3;AT2G28470.1;AT2G28470.5	AT2G28470.4	577	595	yes	no	2;3	1.0544e-146	295.78	1	2	2	2	2	1	259000000	255250000	335940000	401700000	436910000	374650000
GGSSTLVVGK	10	0	903.503	AT5G64260.1	AT5G64260.1	96	105	yes	yes	1;2	0.00424	123.21	2	2	2	2	2	2	631300000	537830000	527040000	342730000	364740000	443150000
GGTFQNYYMYHGGTNFDR	18	0	2126.89	AT2G28470.4;AT2G28470.2;AT2G28470.3;AT2G28470.1;AT2G28470.5	AT2G28470.4	283	300	yes	no	3	0.00020459	77.39	1	1			1	1	83630000	82836000	0	0	66501000	0
GGTGCVFVDDR	11	0	1181.51	AT1G20160.1;AT1G20160.2;AT1G20160.3	AT1G20160.1	428	438	yes	no	2	2.4838e-27	219.8	1	1	1	1	1	1	667930000	0	636640000	479980000	483920000	518070000
GGTLISYEGK	10	0	1023.52	AT3G03250.3;AT3G03250.1;AT3G03250.2;AT5G17310.2;AT5G17310.6;AT5G17310.4;AT5G17310.3;AT5G17310.5;AT5G17310.1	AT3G03250.3	257	266	no	no	2	0.012004	95.358				1	1		0	0	0	33891000	0	0
GGVTVSIK	8	0	759.449	AT4G34260.1	AT4G34260.1	784	791	yes	yes	2	0.013627	117.16	1	1	1	1	1	1	36608000	61894000	56704000	34215000	42429000	39022000
GGYTISDDSSGNKPDVILIGTGSELEIAAQAAEVLR	36	1	3645.84	AT3G60750.2;AT3G60750.1	AT3G60750.2	614	649	yes	no	3	1.2151e-17	92.387	1		1	1	1	1	0	0	17776000	27983000	18496000	13832000
GGYYDFVK	8	0	947.439	AT3G01500.4;AT3G01500.1;AT3G01500.3;AT3G01500.2	AT3G01500.4	234	241	yes	no	1;2	0.040651	122.13	2	2	2	2	2	2	396210000	613560000	453990000	468480000	489080000	418670000
GHSLESIK	8	0	869.461	AT1G32060.1	AT1G32060.1	210	217	yes	yes	2	1.1163e-17	198.87	1	1	1	1	1	1	66942000	92794000	56335000	42883000	0	29673000
GHSSFGDSSQK	11	0	1135.49	AT4G09020.1	AT4G09020.1	195	205	yes	yes	2	0.0035128	107.15	1	1					1915500	0	0	0	0	0
GHTLHVFINK	10	0	1164.64	AT5G63810.1	AT5G63810.1	507	516	yes	yes	2;3	2.059e-35	275.71	2	2	2	2	2	2	86094000	74794000	77618000	58517000	72154000	64746000
GHTVLWDDPLMQPTWVPK	18	0	2119.06	AT4G33810.5;AT4G33810.1;AT4G33810.4;AT4G33810.3;AT4G33810.2	AT4G33810.5	241	258	yes	no	2;3	1.525e-21	139.49	1	1	1	1	1	2	45731000	33121000	43302000	0	42916000	49316000
GHVLSPIAGGTIAQFIVQESGENSGGR	27	0	2680.36	AT4G39640.2;AT4G39640.1	AT4G39640.2	528	554	yes	no	3	1.4929e-70	226.24	1	1	1	1			88116000	100640000	103120000	10845000	0	0
GHYLNATAGTCEEMIK	16	0	1793.81	ATCG00490.1	ATCG00490.1	237	252	yes	yes	2;3	4.1534e-172	383.06	5	5	6	4	5	5	7285700000	6466700000	5218000000	5333300000	5725000000	7609100000
GHYLNATAGTCEEMIKR	17	1	1949.91	ATCG00490.1	ATCG00490.1	237	253	yes	yes	3	0.00021259	88.133		1	1	1	1	1	0	31913000	25584000	27232000	22172000	36349000
GIATFVTDLFQGAK	14	0	1466.78	AT4G23690.1	AT4G23690.1	160	173	yes	yes	2	5.9715e-90	271.04	1	1	1	1	1	1	64968000	67137000	72090000	47512000	61112000	53292000
GIAWVNGQSIGR	12	0	1256.66	AT2G28470.4;AT2G28470.2;AT2G28470.3;AT2G28470.1;AT2G28470.5	AT2G28470.4	647	658	yes	no	2	7.2772e-07	147.4	1	1	1	1	1	1	19540000	20927000	17328000	21366000	26379000	27571000
GIDDIMVSLAAK	12	0	1231.65	AT5G66190.1;AT5G66190.2	AT5G66190.1	326	337	yes	no	2	0.00065435	123.75	2	1	1	2	2	2	61926000	23960000	32808000	77690000	72510000	89891000
GIDLYFER	8	0	1011.5	AT1G63770.7;AT1G63770.4;AT1G63770.6;AT1G63770.5;AT1G63770.3;AT1G63770.2;AT1G63770.1	AT1G63770.7	407	414	yes	no	2	0.057216	87.323		1				1	0	6833400	0	0	0	11626000
GIEFHTEESPEAIIK	15	0	1698.85	AT3G54660.1	AT3G54660.1	315	329	yes	yes	2;3	1.9497e-12	186.81		1	1	2	1	2	0	27856000	117040000	91579000	39925000	89756000
GIELILSTEIVK	12	0	1313.78	AT3G52880.1;AT3G52880.2	AT3G52880.1	86	97	yes	no	2	0.00046107	115.78			1		1		0	0	3755600	0	5905500	0
GIELYCAPTADGSK	14	0	1480.69	AT3G44310.3;AT3G44310.1;AT3G44310.4;AT3G44310.2;AT3G44300.1	AT3G44310.3	202	215	yes	no	2	0.011324	72.531			1				0	0	14153000	0	0	0
GIESLDLSYNQFHLNTIPK	19	0	2188.12	AT1G33590.1;AT1G33590.3;AT1G33590.2	AT1G33590.1	318	336	yes	no	2;3	1.409e-112	326.36	2	2	2	2	2	2	2525400000	2130000000	2486300000	4252500000	4319200000	4613000000
GIEVIYEDPVAGADFEK	17	0	1850.89	AT1G63940.4;AT1G63940.1;AT1G63940.2;AT1G63940.3	AT1G63940.4	136	152	yes	no	2	4.6746e-14	173.11	1	1	1	1	1	1	43033000	55153000	33613000	47869000	54527000	67417000
GIFTNVTSPTAK	12	0	1234.66	AT3G55800.1	AT3G55800.1	308	319	yes	yes	2	1.122e-34	225.66	1	1	1	1	1	1	332270000	520580000	426710000	486280000	436530000	473820000
GIHPEVANVASADEFEYKDPVDGSVSK	27	1	2859.36	AT1G70730.1;AT1G70730.3;AT1G70730.2	AT1G70730.1	483	509	yes	no	3;4	3.1457e-27	166.57		1		1	2	2	0	60818000	0	46531000	76339000	70883000
GIHVLAEIDVPGHALSWGK	19	0	1998.07	AT1G65590.1	AT1G65590.1	263	281	yes	yes	3	0.0056588	53.188	1		1		1		18638000	0	14568000	0	0	0
GIICFNSDR	9	0	1080.5	AT1G33610.1	AT1G33610.1	65	73	yes	yes	2	0.0072396	121.62	1	1	1	1	1	1	49370000	64309000	46133000	60222000	66510000	60849000
GIIIFAGPEVSGFDK	15	0	1548.82	AT4G33810.5;AT4G33810.1;AT4G33810.4;AT4G33810.3;AT4G33810.2	AT4G33810.5	427	441	yes	no	1;2	7.5288e-07	128.88	2	1	1	2	2	2	376410000	287720000	365630000	353520000	364060000	328650000
GIKPNDGFYSLDEIK	15	1	1694.85	AT1G14210.1	AT1G14210.1	155	169	yes	yes	2;3	0.00941	142.91	2	2	2	2	2	2	83528000	111560000	69316000	91860000	83158000	85631000
GILAADESTGTIGK	14	0	1331.69	AT2G36460.1;AT5G03690.2;AT5G03690.1;AT3G52930.1;AT4G26530.3;AT4G26530.2;AT4G26530.1	AT3G52930.1	25	38	no	no	2	0.0010107	100.69	1	1	1	1	1	1	0	142840000	115780000	0	80045000	73014000
GILAIDESNATCGK	14	0	1447.7	AT2G01140.1	AT2G01140.1	61	74	yes	yes	2	1.6878e-07	124.67		1	1	1			0	46587000	0	0	0	0
GILAMDESNATCGK	14	0	1465.65	AT4G38970.1;AT4G38970.2	AT4G38970.1	68	81	yes	no	2	6.6158e-27	187.42	2	2	2	2	2	2	641890000	594550000	602410000	460010000	509390000	689050000
GILAQLGYNSLDDIIGR	17	0	1816.97	AT5G04140.1;AT5G04140.2	AT5G04140.1	1283	1299	yes	no	2	2.888e-102	276.95	1	1	1	1	1	1	18900000	16290000	20447000	33520000	27521000	28259000
GILDVCDAPLVSVDFR	16	0	1774.89	AT1G42970.1	AT1G42970.1	355	370	yes	yes	2	0.0037473	95.401				1			0	0	0	4736600	0	0
GILDVCDEPLVSVDFR	16	0	1832.9	AT1G12900.2;AT1G12900.4;AT1G12900.3;AT3G26650.1;AT1G12900.1;AT1G12900.5	AT1G12900.2	253	268	yes	no	2	5.8485e-37	202.81	1		1	1		1	0	0	10683000	9053100	0	11631000
GILESLR	7	0	786.46	AT1G23310.1;AT1G23310.2;AT1G70580.4;AT1G70580.3;AT1G70580.2;AT1G70580.1	AT1G23310.1	358	364	yes	no	2	0.0056341	164.78	1	1	1	1			136010000	139640000	93848000	115860000	0	0
GILGYTEDDVVSTDFVGDNR	20	0	2171	AT1G13440.1;AT1G13440.2;AT3G04120.1	AT3G04120.1	276	295	no	no	2	5.0753e-225	339.28	1	1	1	1	1	1	68822000	84540000	78071000	99866000	83689000	86543000
GILHVSVVPSNR	12	0	1276.73	AT4G25900.1	AT4G25900.1	305	316	yes	yes	2;3	1.1832e-24	222.42	2	2	2	2	2	2	429560000	611090000	559600000	585900000	650670000	582480000
GILIDSGTVITR	12	0	1243.71	AT1G79720.1	AT1G79720.1	355	366	yes	yes	2	1.5811e-09	160.36	1	1	1	1	1	1	379990000	292340000	309400000	459970000	443980000	442340000
GILQHDPFEVLDQQGVGQLIK	21	0	2333.24	AT4G15530.7;AT4G15530.3;AT4G15530.2;AT4G15530.4;AT4G15530.1;AT4G15530.6;AT4G15530.5	AT4G15530.7	778	798	yes	no	3	2.9465e-06	85.974	1	1		1	1		6736500	9807100	0	9651100	12637000	0
GILQSAVK	8	0	814.491	AT4G25000.1	AT4G25000.1	273	280	yes	yes	2	0.011284	120.65	1	1	1	1	1	1	78047000	105770000	63129000	0	84905000	124840000
GILVSCSAGNAGPSSSSLSNVAPWITTVGAGTLDR	35	0	3401.69	AT5G67360.1	AT5G67360.1	305	339	yes	yes	3;4	1.5954e-27	111.58	1	1	1	2	2	2	53393000	40743000	42100000	61105000	69125000	60620000
GINEDGINYYSGLIDGLIAR	20	0	2152.08	AT5G25980.3;AT5G25980.1;AT5G25980.2	AT5G25980.3	142	161	yes	no	2;3	2.1908e-249	429.37	3	3	3	3	3	3	913580000	657660000	992960000	628580000	594700000	634770000
GIPSILK	7	0	726.464	AT5G04590.1	AT5G04590.1	519	525	yes	yes	2	0.051011	96.048				1	1	1	0	0	0	18484000	18121000	12634000
GIPYEYVEEILENK	14	0	1694.84	AT2G29450.1	AT2G29450.1	29	42	yes	yes	2	0.0016869	91.937	1	1	1	1		1	24847000	22508000	19053000	5037100	0	5635900
GIQTSEDYR	9	0	1067.49	AT1G56340.2;AT1G56340.1;AT1G09210.1	AT1G09210.1	68	76	no	no	2	0.0072396	121.62		1				1	0	34955000	0	0	0	0
GIQVIVVTDGER	12	0	1284.7	AT5G11670.1;AT5G25880.3;AT5G25880.2;AT5G25880.1	AT5G11670.1	178	189	yes	no	2	0.008982	97.456			1	2		1	0	0	72732000	39906000	0	82261000
GISAAAELLPGK	12	0	1125.64	AT4G34260.1	AT4G34260.1	816	827	yes	yes	2	0.002201	128.35	1	1	1	1	1	1	0	32269000	0	0	19401000	15932000
GISGEIPK	8	0	799.444	AT3G20820.1	AT3G20820.1	114	121	yes	yes	1	0.056591	108.7	1	1	1	1	1	1	400420000	263290000	301800000	212650000	269690000	204000000
GISGFPPSSGTFTPEFR	17	0	1782.86	AT3G57240.1	AT3G57240.1	164	180	yes	yes	2	2.0286e-19	174.9	2	2	2	3	2	1	151120000	100610000	168900000	187140000	167250000	148670000
GISGVIPSCIENLPFLR	17	0	1871	AT5G12940.1	AT5G12940.1	121	137	yes	yes	2	2.9258e-06	180.2	1	1	1		1		25468000	33273000	38414000	0	5201400	0
GITSDEVVSPCLLK	14	0	1516.78	AT1G65900.2;AT1G65900.1	AT1G65900.2	78	91	yes	no	2	2.3923e-05	136.94	1	1		1	1	1	37803000	29977000	0	16258000	19252000	30864000
GIVDSEDLPLNISR	14	0	1526.79	AT5G56030.1;AT5G56010.1;AT5G56000.1;AT5G56030.2	AT5G56030.1	358	371	yes	no	2	0.024356	72.34	1		1		1	1	23524000	0	18135000	0	14196000	20633000
GIYYVMDYFK	10	0	1297.61	AT5G26000.2;AT5G26000.1	AT5G26000.2	399	408	yes	no	2	0.03088	81.594	1	1	1	1	1	1	25553000	22941000	28712000	22734000	21036000	22270000
GKEHVEVEFIVGNIPIDDGIGK	22	1	2364.23	AT5G13980.1;AT5G13980.2;AT5G13980.3	AT5G13980.1	699	720	yes	no	3;4	6.4615e-10	111.97	2		2	2	2	2	182930000	0	200140000	172030000	220220000	161300000
GKHIIVATGSDVK	13	1	1323.75	AT1G48030.5;AT1G48030.4;AT1G48030.3;AT1G48030.2;AT1G48030.1;AT3G17240.3;AT3G17240.1	AT1G48030.5	177	189	no	no	3	0.038014	49.482	1	1	1	1	1	1	33390000	29662000	32379000	33392000	31549000	30848000
GKLETESLLQSK	12	1	1331.73	AT1G09340.1;AT1G09340.2	AT1G09340.1	189	200	yes	no	2;3	6.4937e-52	241.92	2	2	2	2	2	2	254110000	211230000	196060000	246560000	228240000	219780000
GKPVVLYFYPADETPGCTK	19	1	2141.05	AT3G26060.3;AT3G26060.1;AT3G26060.2	AT3G26060.3	33	51	yes	no	3	0.00033109	64.249	1	1		1	1	1	35653000	37856000	0	38216000	29183000	30268000
GKPYEGSITK	10	1	1078.57	AT1G11860.1;AT1G11860.2;AT1G11860.3	AT1G11860.1	387	396	yes	no	2	0.06022	98.73		1	1	1	1	1	0	124720000	75203000	124670000	155730000	153480000
GLAITYTSK	9	0	952.523	AT3G13790.2;AT3G13790.1;AT3G13790.5;AT3G13790.4;AT3G13790.3	AT3G13790.2	213	221	yes	no	2	0.00071222	133.12	1	1	1	1		1	0	73286000	59794000	0	0	0
GLALEAAQQGIVLLK	15	0	1522.91	AT1G02640.1	AT1G02640.1	386	400	yes	yes	2	0.00031083	90.827		1	1				0	9987000	0	0	0	0
GLDGHVMEHLK	11	0	1234.61	AT4G23670.1	AT4G23670.1	86	96	yes	yes	2;3	0.00021842	135.55	4	3	3	4	4	4	193190000	150260000	133540000	94667000	80392000	151100000
GLDVDQETLTK	11	0	1217.61	AT3G19170.1;AT3G19170.2	AT3G19170.1	978	988	yes	no	2	6.0227e-10	169.09	2	1	1	1	1	2	84751000	55304000	47994000	96534000	76977000	84151000
GLEMLVGK	8	0	845.468	AT1G68560.1;AT3G45940.1	AT1G68560.1	897	904	yes	no	2	0.043943	84.097	1		1				18951000	0	34959000	0	0	0
GLENLVSQIDTVK	13	0	1414.77	AT5G22580.1	AT5G22580.1	26	38	yes	yes	2	3.6471e-13	167.12	1	1	1	1	1	1	81080000	80424000	74617000	99544000	87011000	100880000
GLETFSQLCAFDYITK	16	0	1891.9	AT3G55260.1	AT3G55260.1	153	168	yes	yes	2	4.4451e-27	190.3	1	1	1	1	1	1	24081000	0	22137000	26864000	22361000	29818000
GLFDFLGK	8	0	895.48	AT1G20440.1;AT1G76180.2;AT1G76180.1	AT1G20440.1	33	40	no	no	2	0.034351	97.068	1	1	1	1	1	1	6574200	7195300	8071000	14049000	11142000	13677000
GLFESDAALTMNPAALAQVK	20	0	2046.05	AT4G11290.1	AT4G11290.1	265	284	yes	yes	2;3	3.9254e-17	222.73	2	2	1	2	2	1	101850000	104090000	33380000	85815000	106290000	34237000
GLFGGSSGLMGLGR	14	0	1307.67	AT1G79720.1	AT1G79720.1	258	271	yes	yes	2	0.00052462	107.83	2	2	2	2	2	2	20099000	31372000	38240000	51153000	23802000	62614000
GLFIIDK	7	0	804.475	AT3G11630.1;AT5G06290.1;AT5G06290.2	AT3G11630.1	196	202	no	no	2	0.036796	105.27	1	1	1	1	1	1	150600000	229180000	155920000	89033000	111090000	130130000
GLFLDSCHAHCQGGSAASWSGDK	23	0	2447.04	AT4G19410.1;AT4G19410.2	AT4G19410.1	325	347	yes	no	2;3;4	3.2273e-123	313.26	3	2	3	3	3	2	1238900000	1044100000	1452400000	995980000	835940000	748390000
GLFLDSCHAHCQGGSAASWSGDKGPQVANTR	31	1	3270.47	AT4G19410.1;AT4G19410.2	AT4G19410.1	325	355	yes	no	3;4;5	3.0332e-184	299.33	3	2	3	3	2	3	182610000	134990000	164090000	140990000	55652000	146020000
GLFQSDSALTTNPTTLSNINR	21	0	2249.13	AT1G05260.1	AT1G05260.1	264	284	yes	yes	2;3	0	355.74	2	2	2	3	2	2	559390000	411430000	493530000	578340000	439980000	532030000
GLFSFLR	7	0	838.47	AT3G10520.1	AT3G10520.1	45	51	yes	yes	2	0.012636	126.04	1	1	1		1		3162000	3173100	6101200	0	7978200	0
GLFTSDQVLFTDSR	14	0	1584.78	AT4G37530.1	AT4G37530.1	269	282	yes	yes	2	1.3119e-139	306.48	1	1	1	1	1	1	355900000	270650000	281130000	275250000	231070000	297410000
GLGDTDQVLAYFAVSK	16	0	1682.85	AT1G16080.1	AT1G16080.1	134	149	yes	yes	2	0.001262	111.94	1		1	1	1	1	12212000	0	16695000	18459000	23527000	20301000
GLGGLLDIDSNYGFR	15	0	1595.79	AT5G18860.2;AT5G18860.1	AT5G18860.2	139	153	yes	no	2	4.2306e-08	155	1	1	1	1	1	1	16272000	13584000	17063000	14025000	12994000	12230000
GLGLLESDHGLFSDPR	16	0	1711.85	AT5G40150.1	AT5G40150.1	266	281	yes	yes	3	0.065214	31.614	1	1	1	1	1	1	15935000	15856000	16465000	10468000	10434000	10711000
GLGLLESDHGLYSDPR	16	0	1727.85	AT3G28200.1	AT3G28200.1	254	269	yes	yes	2;3	1.2439e-19	153.74	2	2	2	2	1	2	150270000	57542000	136370000	47062000	38566000	96226000
GLGSGIGQR	9	0	843.456	AT5G53370.1;AT5G53370.2	AT5G53370.1	536	544	yes	no	2	1.9581e-13	170.73	3	2	2	1	1	1	15207000	156190000	144950000	38806000	0	45625000
GLIGEVICR	9	0	1015.55	AT4G09320.1	AT4G09320.1	16	24	yes	yes	2	1.3576e-07	183.9	1	1	1	1	1	1	134000000	151920000	117330000	73346000	81147000	74021000
GLIHYQK	7	0	857.476	AT3G62020.2;AT3G62020.1	AT3G62020.2	122	128	yes	no	2	0.0061111	148.4	1	1	1	1	1	1	403160000	391180000	380590000	326570000	287480000	180020000
GLIKPGESVLIEPTSGNTGVGLAFTAAAK	29	1	2797.52	AT4G14880.5;AT4G14880.4;AT4G14880.3;AT4G14880.2;AT4G14880.1;AT3G22460.2;AT3G22460.1	AT4G14880.5	61	89	yes	no	3	3.8571e-07	80.439	1		1	1	1	1	23817000	0	17760000	29348000	27859000	25462000
GLIQSDQELFSSPDAADTLPLVR	23	0	2471.25	AT4G08780.1	AT4G08780.1	264	286	yes	yes	2;3	3.4823e-05	111.92		2	1	2		2	0	11975000	13647000	23967000	0	26193000
GLISEIISR	9	0	986.576	AT4G11010.1	AT4G11010.1	103	111	yes	yes	2	3.3496e-07	178.99		1	1	1	1	1	0	34034000	44839000	52783000	38819000	46246000
GLIVHLEK	8	0	907.549	AT5G58480.1	AT5G58480.1	289	296	yes	yes	2	0.03135	99.375		1	1	1	1	1	0	15638000	11853000	18423000	18093000	18339000
[truncated: 4,037 more rows]
