# Supplementary material for: Analysis of the apoplast fluid proteome during the induction of systemic acquired resistance in Arabidopsis thaliana
Source: PeerJ. 2023 Oct 20;11:e16324. doi: 10.7717/peerj.16324 (PMC10592298; doi:10.7717/peerj.16324)
Supplement: Supplemental Information 3 [file peerj-11-16324-s003.xlsx]

## Sheet: Proteins unique in Pst
Protein IDs	Gene name	Description	Peptides	Unique peptides	Sequence coverage [%]	Unique sequence coverage [%]	Mol. weight [kDa]	Score	LFQ intensity CK-1	LFQ intensity CK-2	LFQ intensity CK-3	LFQ intensity Pst-1	LFQ intensity Pst-2	LFQ intensity Pst-3
AT5G49460	ACLB-2	ATP citrate lyase subunit B 2	5	5	14	14	65.827	41.973					26028000	20152000
AT5G40150		Peroxidase superfamily protein	2	2	10.4	10.4	36.12	64.197				81397000	96774000	72825000
AT5G16710	DHAR3	dehydroascorbate reductase 1	2	2	10.1	10.1	28.514	8.4674				17973000		16534000
AT4G36360	BGAL3	beta-galactosidase 3	5	4	7.5	6.7	95.064	9.6623				56661000	54465000	58838000
AT4G20430		unknown	4	3	5.4	4.3	89.119	6.2827				17969000	20933000	18090000
AT4G15100	scpl30	serine carboxypeptidase-like 30	6	5	17	13.3	55.259	65.063				52478000	56056000	52369000
AT4G08780		Peroxidase superfamily protein	3	2	13.9	11	38.085	10.007				14384000		15693000
AT4G01900	GLB1	GLNB1 homolog	2	2	11.2	11.2	21.275	6.1045				17175000		13420000
AT3G61490	PGF9	Polygalacturonase Clade F 9	2	2	6.9	6.9	51.938	22.598				16186000	15332000	13400000
AT3G43270		PECTIN METHYL ESTERASE INHIBITOR-PECTIN METHYLESTERASE 32	5	2	9.3	3.4	57.635	9.9093				30110000		25269000
AT3G19710	BCAT4	branched-chain aminotransferase4	4	4	14.4	14.4	39.018	18.895				26328000	27796000	23705000
AT3G01120	AtCYS1	CYSTATHIONINE GAMMA-SYNTHASE 1 OVERACCUMULATION 1	3	3	6.6	6.6	59.918	2.9951				9278500	8477600
AT2G33150	PKT3	peroxisomal 3-ketoacyl-CoA thiolase 3	4	4	13	13	48.578	11.985				11402000	10705000	15636000
AT2G23610	MES3	methyl esterase 3	4	4	19.4	19.4	29.823	10.927				13965000	20358000	15750000
AT1G61900		unknown	3	3	12.1	12.1	45.091	32.475				42160000	47318000
AT1G56450	PBG1	20S proteasome beta subunit G1	1	1	7.3	7.3	27.651	77.681				26967000	33471000
AT1G31180	IMDH3	isopropylmalate dehydrogenase 3	7	2	22	8.4	43.847	10.77				21154000	23903000	18191000
AT1G12570		unknown	3	2	7	5.6	62	40.311					25597000	26945000
AT1G10960	FD1	ferredoxin 1	1	1	23	23	15.897	52.669				108350000	120660000	98780000

## Sheet: Proteins unique in Mock
Protein IDs	Gene name	Description	Peptides	Unique peptides	Sequence coverage [%]	Unique sequence coverage [%]	Mol. weight [kDa]	Score	LFQ intensity CK-1	LFQ intensity CK-2	LFQ intensity CK-3	LFQ intensity Pst-1	LFQ intensity Pst-2	LFQ intensity Pst-3
AT5G55480	GDPDL4	Glycerophosphodiester phosphodiesterase (GDPD) like 4	5	5	8.2	8.2	84.164	19.853	62692000	65741000	55471000
AT5G39580	PRX62	peroxidase 62	7	7	37.3	37.3	34.133	55.272	17597000	14116000
AT5G11540	GulLO3	L -gulono-1,4-lactone ( L -GulL) oxidase 3	3	3	6.5	6.5	64.96	5.0897	24559000		29388000
AT4G30610	BRS1	BRI1 SUPPRESSOR 1	2	2	6.2	6.2	52.844	5.8586	24429000		25078000
AT4G22010	sks4	SKU5 similar 4	4	3	8.3	5.4	60.455	8.4714	59774000	56480000
AT4G20360	SVR11	SUPPRESSOR OF VARIEGATION11	3	3	8	8	51.63	13.029	38703000		40074000
AT4G18930		unknown	2	2	16.6	16.6	20.514	8.7373	22021000	17851000
AT3G59980		OB-fold-like protein	3	3	19.8	19.8	29.745	89.758	13416000	16126000
AT3G47520	MDH	malate dehydrogenase	5	3	16.9	13.9	42.405	23.525	12128000		13299000
AT3G23450	KRATOS		2	2	41.7	41.7	33.357	2.8214	715290000	864150000	747680000
AT3G13920	TIF4A1	eukaryotic translation initiation factor 4A1	2	2	4.7	4.7	45.7	2.0839	24793000	25632000
AT2G41740	VLN2	villin 2	3	2	4.6	3.3	107.84	29.473	59342000	62560000	56348000
AT2G30870	GSTF10	glutathione S-transferase PHI 10	2	2	11.2	11.2	24.23	8.6124	39834000		35059000
AT2G27190	PAP12	PURPLE ACID PHOSPHATASE 12	3	3	9.4	9.4	54.122	27.863		30373000	29349000
AT2G24280		alpha/beta-Hydrolases superfamily protein	3	3	9	9	49.188	5.2353	30352000	34925000	28062000
AT1G74000	SS3	strictosidine synthase 3	4	4	17.3	17.3	34.666	9.7388	22970000	31519000	24669000
AT1G66200	GSR2	glutamine synthetase 1;2	4	0	10.7	0	40.39	4.2246	51964000		44482000
AT1G66180		putative aspartyl protease	2	2	8.8	8.8	47.313	14.552	41732000	40417000	34458000
AT1G33811	GGL7	GDSL-motif lipase	7	7	18.9	18.9	41.697	25.699	277670000	270010000	265000000
AT1G28110	SCPL45	serine carboxypeptidase-like 45	3	3	7.4	7.4	51.802	5.1659	13909000	10050000
AT1G26380	FOX1	FAD-LINKED OXIDOREDUCTASE 1	4	2	9.9	5.8	59.817	21.126	22235000	20124000
AT1G05570	CALS1	callose synthase 1	2	2	1.3	1.3	221.02	2.1632	131900000	152520000	137960000
AT1G02640	BXL2	beta-xylosidase 2	7	6	10.8	9.9	82.984	21.411		19392000	20209000

## Sheet: Proteins common in Pst and Mock
Protein IDs	Gene name	Description	Peptides	Unique peptides	Sequence coverage [%]	Unique sequence coverage [%]	Mol. weight [kDa]	Score	LFQ intensity CK-1	LFQ intensity CK-2	LFQ intensity CK-3	LFQ intensity Pst-1	LFQ intensity Pst-2	LFQ intensity Pst-3
ATCG00490	RBCL		34	34	62.6	62.6	52.954	323.31	37354000000	44426000000	39395000000	41155000000	41831000000	44304000000
AT5G67360	SBT1.7	Subtilisin-like Serine protease 1.7	25	24	52.7	51.3	79.414	323.31	2191200000	2307000000	2292100000	2579400000	2490400000	2797600000
AT5G67130		PLC-like phosphodiesterases superfamily protein	4	4	10.8	10.8	46.607	19.67	27137000			48621000	48978000
AT5G66920	sks17	SKU5 similar 17	6	6	14.5	14.5	60.82	54.039	174640000	137410000	183290000	216700000	190610000	162590000
AT5G66590		Pathogenesis-related 1 protein) superfamily protein	7	7	43.2	43.2	20.099	99.229	171400000	118570000	129970000	98610000	105290000	119010000
AT5G66530		Galactose mutarotase-like superfamily protein	7	7	35.5	35.5	30.476	26.078	60070000	58559000	66242000	76180000	69773000	73852000
AT5G66190	LFNR1	leaf-type chloroplast-targeted FNR 1	12	11	44.7	41.7	40.326	292.87	469950000	413060000	396430000	608630000	562440000	591480000
AT5G66150		Glycosyl hydrolase family 38 protein	1	1	1.6	1.6	117.88	19.197	72182000	48517000	63605000	70423000	69461000	83368000
AT5G66090		cell wall integrity/stress response component	6	6	35.7	35.7	22.54	40.443	49785000	58889000	52142000	62868000	67599000	69983000
AT5G65730	XTH6	xyloglucan endotransglucosylase/hydrolase 6	12	10	61.3	58.6	33.692	323.31	1868000000	1782800000	1721500000	1331500000	1464100000	1506900000
AT5G65620	OOP	organellar oligopeptidase	11	11	16.3	16.3	90.368	66.778	55177000	44555000	48938000	56714000	62755000	55124000
AT5G65430	GRF8	general regulatory factor 8	9	4	44.3	23.2	27.771	5.6122	28068000	28690000	24405000	19974000	25412000	23897000
AT5G64570	XYL4	beta-D-xylosidase 4	24	19	43.2	36.9	84.307	323.31	2472900000	2265600000	2302600000	3252600000	3319500000	3353800000
AT5G64260	EXL2	EXORDIUM like 2	5	4	18.7	15.7	32.674	20.479	389860000	402580000	388020000	282870000	277760000	302120000
AT5G64120	PRX71	peroxidase 71	17	17	68.9	68.9	34.889	323.31	1074200000	1077800000	1170400000	729780000	720470000	805830000
AT5G64100	PRX69	Peroxidase 69	6	4	20.5	17.8	35.678	20.111	36077000		34132000	30829000	31972000
AT5G63980	SUPO1	suppressors of PIN1 overexpression 1	5	5	27.2	27.2	37.564	72.114	22572000		23516000	34198000
AT5G63890	HISN8	HISTIDINE BIOSYNTHESIS 8	3	3	9.1	9.1	48.956	11.353	39504000	54581000		50942000	44509000
AT5G63860	UVR8	UVB-RESISTANCE 8	6	6	17.3	17.3	47.118	52.558	42945000	36207000	30579000	38859000	38615000	33479000
AT5G63810	BGAL10	beta-galactosidase 10	23	21	35.9	34.8	83.101	323.31	472990000	529210000	484640000	344370000	346760000	376210000
AT5G63800	BGAL6	beta-galactosidase 6	29	28	50	49	79.758	323.31	2139200000	2214500000	2279000000	3512500000	3302600000	3420500000
AT5G63570	GSA1	glutamate-1-semialdehyde-2,1-aminomutase	8	2	25.3	6.8	50.369	16.216	67195000	83528000	80908000	85168000	86033000	87451000
AT5G63310	NDPK2	nucleoside diphosphate kinase 2	5	5	20.8	20.8	25.55	14.309	170320000	152280000	162660000	155050000	161660000	164680000
AT5G63180		Pectin lyase-like superfamily protein	8	6	21.3	17.6	47.894	100.3	127340000	131290000	142800000	111190000	115600000	109940000
AT5G62790	PDE129	PIGMENT-DEFECTIVE EMBRYO 129	4	4	12.6	12.6	51.963	19.055	37504000	31165000	36406000		38887000	37685000
AT5G62360	PMEI13	pectin methyl-esterase inhibitor 13	2	2	7.4	7.4	22.336	31.192	189700000	129070000	139330000	73857000	79427000	73696000
AT5G61410	EMB2728	EMBRYO DEFECTIVE 2728	4	4	26.3	26.3	30.008	189.36	90351000	85752000	121970000	90482000	89636000	98175000
AT5G60600	CSB3	CONSTITUTIVE SUBTILISIN 3	3	3	5.9	5.9	80.421	72.835	14007000	8311900	12566000	11833000	13315000	12957000
AT5G60360	SAG2	SENESCENCE ASSOCIATED GENE2	2	2	4.5	4.5	38.902	4.6606	185460000	245080000	176200000	206020000	190920000	203870000
AT5G59880	ADF3	actin depolymerizing factor 3	5	5	69.4	69.4	14.124	247.71	470290000	484750000	532990000	510620000	476230000	498760000
AT5G59680		Leucine-rich repeat protein kinase family protein	7	6	9.9	9	98.368	35.461	50253000	42495000	54864000	96309000	95923000	97287000
AT5G58480		O-Glycosyl hydrolases family 17 protein	3	3	9.7	9.7	52.37	39.824	55607000	53395000	61216000	93569000	87580000	90540000
AT5G58330	NADP-MDH	NADP-dependent Malate Dehydrogenase	5	5	17.7	17.7	36.39	11.32	45025000	49585000	44207000	41185000	46119000	47979000
AT5G58090		O-Glycosyl hydrolases family 17 protein	6	6	13	13	52.211	22.867	46926000	52288000	47597000	60252000	66609000	61413000
AT5G57850	DAT1	D-AA specific transaminase D-AAT	4	4	13.5	13.5	32.271	7.8198	26884000	19492000	25879000	33144000	32344000	22241000
AT5G57700		unknown	3	3	11	11	38.478	21.176	57563000		42663000	52675000	55223000	46333000
AT5G57560	XTH22	Touch 4, xyloglucan endotransglucosylase/hydrolase 22	9	5	35.2	23.2	32.093	70.394	224380000	287890000	237520000	252620000	253180000	240320000
AT5G57550	XTR3	xyloglucan endotransglycosylase 3	7	6	22.9	20.1	32.572	17.351	52475000	71682000	49854000	97425000	101590000	102670000
AT5G57330		Galactose mutarotase-like superfamily protein	11	11	42	42	35.447	173.2	154910000	137050000	136600000	208020000	207050000	181540000
AT5G56890		Protein kinase superfamily protein	3	3	3.9	3.9	119.24	24.778	48806000		43108000	55944000	59194000	49425000
AT5G56870	BGAL4	beta-galactosidase 4	30	21	52.2	41	80.59	323.31	2109900000	2120800000	2135500000	2992700000	3170100000	3510600000
AT5G56030	ERD8	EARLY-RESPONSIVE TO DEHYDRATION 8	5	5	8.6	8.6	80.063	10.959	30046000	31144000	33225000	26968000	21794000
AT5G55730	FLA1	FASCICLIN-like arabinogalactan 1	6	6	20.8	20.8	44.849	139.24	1359800000	1389300000	1397500000	1776600000	1752600000	1719400000
AT5G55160	SUMO2	small ubiquitin-like modifier 2	3	2	42.7	33	11.654	117.17	133800000	124180000	117740000	100300000	95648000	111650000
AT5G55050		GDSL-motif lipase	5	5	15.4	15.4	41.447	14.414	83383000	82917000	82553000	16883000	19363000	30619000
AT5G54770	THI4	THIAMINE4	6	6	27.5	27.5	36.664	98.149	115740000	83504000	111990000	96788000	126560000	107390000
AT5G53560	CB5-E	cytochrome B5 isoform E	3	3	29.9	29.9	15.084	139.76	75070000	82956000		82163000	88944000
AT5G53490	TL17	Thylakoid lumenal 17.4 kDa protein	3	3	12.8	12.8	25.573	23.376	62614000	63083000	60901000	57167000	55164000	50445000
AT5G53370	ATPMEPCRF	pectin methylesterase PCR fragment F	10	9	20.3	19.1	64.24	51.382	72163000	87910000	74562000	61177000	57625000	48785000
AT5G51970	ATSDH	SORBITOL DEHYDROGENASE	7	7	25.8	25.8	39.255	323.31	74798000	67173000	63959000	66904000	70833000	76621000
AT5G51820	PGM	phosphoglucomutase	13	13	29.7	29.7	67.988	93.991	91475000	96922000	92632000	107270000	119530000	108600000
AT5G50850	MAB1	Transketolase family protein	2	2	6.9	6.9	39.175	13.332	22765000	35560000	39517000	45240000	49097000	45027000
AT5G49910	HSC70-7	HEAT SHOCK PROTEIN 70-7	5	2	8.5	3.8	76.996	46.84	98125000	83525000	91892000	65544000	85776000	71864000
AT5G49760	CARD1	CANNOT RESPOND TO DMBQ 1	2	2	2.7	2.7	104.71	21.46	10277000		11726000	16514000	13906000	13588000
AT5G49360	BXL1	beta-xylosidase 1	33	32	55.7	54.8	83.523	323.31	11973000000	11437000000	12916000000	16250000000	16690000000	17543000000
AT5G48540		receptor-like protein kinase-related family protein	12	12	51.3	51.3	28.995	323.31	1826900000	1692800000	1895100000	2172300000	2197200000	2043900000
AT5G48485	DIR1	DEFECTIVE IN INDUCED RESISTANCE 1	2	2	45.1	45.1	10.702	20.259	84250000	89858000		61408000	74964000	74261000
AT5G48300	ADG1	ADP glucose pyrophosphorylase 1	8	8	22.9	22.9	56.65	54.688	44966000	67118000	50853000	58661000	63452000	67026000
AT5G48230	EMB1276, ACAT2, AACT2	EMBRYO DEFECTIVE 1276	3	3	12.9	12.9	41.411	67.354		11971000		18333000	16850000	23432000
AT5G47550	CYS5	Cysteine proteinase inhibitor 5	3	3	46.7	46.7	13.372	213.07	298000000	168800000	277520000	377880000	376300000	234320000
AT5G46290	KAS1	KETOACYL-ACP SYNTHASE 1	3	3	8.6	8.6	44.729	27.345	58117000	43526000		75104000	99933000	149950000
AT5G45680	FKBP13	FK506-binding protein 13	3	3	12.5	12.5	22.039	5.2044	111730000	141200000	127110000	234390000	233560000	203440000
AT5G45280	PAE11	pectin acetylesterase 11	18	14	70.6	57.5	42.009	323.31	3349600000	3914600000	3534900000	3108000000	3286500000	3422100000
AT5G44720		unknown	2	2	7.5	7.5	34.798	4.437	15137000					16127000
AT5G44400	AtBBE26	FAD-binding Berberine family protein	12	10	23.3	20.1	60.345	47.557	183720000	192320000	166710000	79591000	76069000	74948000
AT5G44390	AtBBE25	FAD-binding Berberine family protein	15	12	31.7	26.8	61.482	194.59	127590000	128470000	108760000	158750000	151320000	135060000
AT5G44380	AtBBE24	FAD-binding Berberine family protein	6	3	10.2	5.7	60.616	12.375	20020000	17920000	21295000		19584000	20060000
AT5G44130	FLA13	FASCICLIN-like arabinogalactan protein 13 precursor	5	4	18.6	15	26.205	268.79	299820000	396040000	326040000	375010000	330140000	351570000
AT5G43940	ADH2	ALCOHOL DEHYDROGENASE 2	12	12	37.2	37.2	40.698	242.51	137570000	140810000	131030000	138840000	139080000	122820000
AT5G43060	RD21B	esponsive to dehydration 21B	8	8	19	19	51.203	225.57	238600000	231070000	273010000	247550000	262750000	231610000
AT5G42980	TRX3	thioredoxin 3	7	7	58.5	58.5	13.109	295.03	608860000	566810000	638880000	532460000	582370000	579620000
AT5G42790	ARS5	ARSENIC TOLERANCE 5	8	8	39.2	39.2	30.476	107.62	40068000	47766000	46354000	44654000	41930000	41466000
AT5G42740		Sugar isomerase (SIS) family protein	5	5	14	14	58.109	16.544	44362000	43811000	43473000	48855000	49930000	58639000
AT5G42720		Glycosyl hydrolase family 17 protein	4	4	11.6	11.6	47.168	4.761			17644000	19813000	23835000	16683000
AT5G42240	scpl42	serine carboxypeptidase-like 42	10	10	23.9	23.9	52.874	117.29	160890000	158630000	161230000	174060000	166370000	150880000
AT5G42100	BG_PPAP	beta-1,3-glucanase_putative	3	3	8.5	8.5	45.063	5.3002	22462000	23557000	22744000	29455000	27281000	23469000
AT5G42020	BIP	luminal binding protein	14	1	28.7	2.7	74.374	157.14	51661000	54325000	60642000	52488000	50638000	47076000
AT5G41870	PGF15	Polygalacturonase Clade F 15	6	6	18.9	18.9	48.643	39.497	45848000	64676000	55270000	116170000	104160000	97690000
AT5G40450	RBB1	Regulator of bulb biogenesis1	14	14	6	6	323	33.956	18941000	32896000	26746000	23059000	19806000	20900000
AT5G40370	GRXC2	glutaredoxin C2	4	4	54.1	54.1	11.756	44.324	47541000	49452000	50422000	35495000	34204000	33400000
AT5G40020		Pathogenesis-related thaumatin superfamily protein	2	2	9.8	9.8	28.094	36.775		117780000	105000000	120340000	102840000	110960000
AT5G39730		AIG2-like (avirulence induced gene) family protein	4	4	23.8	23.8	20.017	27.02	45837000	40540000	39602000	42500000	38053000	41441000
AT5G38480	GRF3	general regulatory factor 3	8	3	32.3	15.4	28.491	80.881	34471000	41811000	38548000	28788000	27614000	38253000
AT5G38430	RBCS1B	Rubisco small subunit 1B	11	4	56.9	20.4	20.286	179.45	789610000	693900000	789600000	952550000	1025500000	955940000
AT5G38420	DEG24, RBCS2B	Rubisco small subunit 2B	11	4	56.9	20.4	20.35	323.31	29297000000	29177000000	30411000000	35926000000	35503000000	31853000000
AT5G37850	SOS4	SALT OVERLY SENSITIVE 4	3	3	13.9	13.9	34.043	7.264	16415000		17824000	20493000	19232000	18138000
AT5G37780	CAM1	calmodulin 1	12	1	57	8.7	16.862	323.31	725960000	777530000	671950000	543630000	531360000	531920000
AT5G36790		unknown	12	11	46.1	42.8	39.761	323.31	264520000	217200000	239440000	315500000	326800000	323420000
AT5G36210		alpha/beta-Hydrolases superfamily protein	6	6	11	11	81.305	21.592	11881000	13987000	11166000	11845000	12469000	11108000
AT5G35630	GS2	glutamine synthetase 2	11	9	37.7	34.4	47.41	97.286	122440000	126230000	122760000	76047000	86644000	99704000
AT5G35590	PAA1	proteasome alpha subunit A1	11	6	44.7	26	27.294	43.838	45222000	31885000	39101000	39892000	40874000	42949000
AT5G34940	GUS3	glucuronidase 3	12	12	28	28	59.708	323.31	476800000	494480000	509820000	613000000	583710000	628790000
AT5G34850	PAP26	purple acid phosphatase 26	14	14	43.2	43.2	55.009	323.31	342500000	354420000	376940000	452650000	468440000	495330000
AT5G27380	GSH2	glutathione synthetase 2	4	4	9.3	9.3	60.27	40.852	24002000					28283000
AT5G26667	PYR6	UMP-CMP kinase 3	2	2	9.4	9.4	22.481	4.9057	22018000		34945000			22810000
AT5G26000	TGG1	thioglucoside glucohydrolase 1	17	16	39.3	36.8	51.481	323.31	4798200000	4261400000	4860100000	4527200000	4400900000	4365700000
AT5G25980	TGG2	glucoside glucohydrolase 2	21	19	55.7	51	53.422	323.31	3419200000	3423700000	3403200000	2524200000	2456600000	2715200000
AT5G25460	DGR2	DUF642 L-GalL responsive gene 2	15	9	43.4	24.9	39.978	205.23	3744500000	3746600000	3551900000	2485700000	2411900000	2326100000
AT5G23870	PAE9	pectin acetylesterase 9	6	6	22.2	22.2	45.963	94.264	136260000	101790000	133630000	208380000	178960000	216540000
AT5G23820	ML3	MD2-related lipid recognition 3	4	4	18.3	18.3	17.907	15.148	250940000	290010000	247540000	162930000	176790000	159770000
AT5G22860		Serine carboxypeptidase S28 family protein	10	10	19.5	19.5	56.454	163.43	139620000	129850000	125080000	109080000	119620000	113290000
AT5G22580		unknown	2	2	22.5	22.5	12.349	14.206	84107000	79603000	68946000	110370000	91529000	89007000
AT5G21105		Plant L-ascorbate oxidase	7	7	16.2	16.2	65.838	22.8	106380000	117870000	131050000	74612000	91660000	84068000
AT5G21100		Plant L-ascorbate oxidase	6	6	17.5	17.5	64.265	236.17	228190000	253400000	241710000	269380000	234400000	269450000
AT5G21090		Leucine-rich repeat (LRR) family protein	5	5	27.5	27.5	24.097	29.001	54034000	69713000	64380000	47910000	46967000	42525000
AT5G20950	BGLC1	Glycosyl hydrolase family protein	9	9	20.2	20.2	67.926	123.05	101590000	128020000	121680000	54036000	68879000	57978000
AT5G20720	CPN20	chaperonin 20	7	7	34.8	34.8	26.802	64.86	68833000	85007000	73965000			17303000
AT5G20630	GER3	GERMIN-LIKE PROTEIN 3	4	4	28.4	28.4	21.836	113.83	11593000000	10811000000	12479000000	11552000000	11516000000	13954000000
AT5G20230	SAG14	SENESCENCE ASSOCIATED GENE 14	3	3	21.4	21.4	20.053	272.85	514830000	493800000	495780000	511130000	449400000	518900000
AT5G20010	RAN-1	RAS-related nuclear protein-1	10	10	56.1	56.1	25.276	60.993	161190000	172250000	154850000	168110000	155640000	174050000
AT5G19890		Peroxidase superfamily protein	9	9	33.5	33.5	35.023	39.964	19134000	23646000	24496000	105800000	105220000	123290000
AT5G19240		Glycoprotein membrane precursor GPI-anchored	3	3	18.1	18.1	21.335	9.4411	171020000	193620000	195130000	240710000	264920000	303240000
AT5G19230		Glycoprotein membrane precursor GPI-anchored	4	4	22.8	22.8	20.51	9.4006	19177000	31614000	26107000	33677000	34446000	32968000
AT5G19220	APL1	ADP glucose pyrophosphorylase large subunit 1	9	9	18.4	18.4	57.673	104.99	48508000	53360000	52776000	46954000	46777000	50089000
AT5G19110		Eukaryotic aspartyl protease family protein	6	6	18.8	18.8	43.362	33.536	26239000	27684000	25195000	21051000	19059000	20353000
AT5G18860	NSH3	nucleoside hydrolase 3	8	8	12.2	12.2	99.071	42.272	36534000	28849000	34966000	22833000	23459000	22842000
AT5G18470		Curculin-like (mannose-binding) lectin family protein	5	5	13.6	13.6	45.807	14.156	72606000	89574000	81712000	103850000	88399000	71966000
AT5G18170	GDH1	glutamate dehydrogenase 1	6	4	22.9	17.5	44.524	29.702	24223000	23702000	24400000	22646000	26920000	22609000
AT5G17920	METS1	methionine synthesis 1, 5-methyltetrahydropteroyltriglutamate homocysteine methyltransferase 1	31	13	42.1	17.5	84.356	323.31	823210000	841860000	860350000	876330000	887260000	859890000
AT5G17310	UGP2	UDP-glucose pyrophosphorylase 2	12	6	30.6	14	51.919	13.885	58537000	68597000	52451000	64007000	72678000	58375000
AT5G16970	AER	alkenal reductase	6	3	22.6	12.5	38.133	44.828	30598000	25240000	24554000	33374000	34351000	30310000
AT5G16440	IPP1	isopentenyl diphosphate isomerase 1	3	3	15.1	15.1	33.214	41.224		38083000	57615000	57294000	53245000	47125000
AT5G16390	CAC1	BIOTIN CARBOXYL-CARRIER PROTEIN 1	3	3	12.6	12.6	26.927	4.9745	36854000		25934000	23789000	30536000	22955000
AT5G15350	ENODL17	early nodulin-like protein 17	2	2	12.2	12.2	19.435	15.38	296750000	220750000	230180000	245990000	236640000	209530000
AT5G14920	GASA14	A-stimulated in Arabidopsis 14	2	2	6.5	6.5	29.138	12.496	2838500000	3040300000	2490700000	642930000	633410000	741590000
AT5G14780	FDH	formate dehydrogenase	9	9	30.2	30.2	39.63	100.11	31709000	34126000	34432000	60885000	56435000	53588000
AT5G14740	CA2	carbonic anhydrase 2	14	7	68	33.2	28.344	323.31	689980000	626260000	699230000	599100000	628740000	636490000
AT5G14450		GDSL-motif lipase	6	6	15.7	15.7	43.57	47.429	66329000	76033000	64732000	57232000	53828000	51957000
AT5G14200	IMD1	isopropylmalate dehydrogenase 1	10	5	33.5	20	44.161	57.477	42010000	30365000	40999000	69925000	73613000	58939000
AT5G13980		Glycosyl hydrolase family 38 protein	31	31	37.5	37.5	115.9	323.31	661160000	620980000	690060000	739200000	747420000	797580000
AT5G13690	CYL1	CYCLOPS 1	17	17	23.2	23.2	92.688	323.31	133550000	158110000	135520000	180390000	197680000	199120000
AT5G13420	GSM2	Glc-hypersensitive mutant 2	4	4	11.4	11.4	47.698	20.347	32701000	29957000	29169000	23244000	33557000	37423000
AT5G13120	CYP20-2	cyclophilin 20-2	5	4	23.5	20.8	27.879	38.806	60216000		71897000	98503000	92349000	80595000
AT5G12950		unknown	16	5	18.6	6.2	96.235	92.02	161380000	206720000	200680000	162120000	149770000	161730000
AT5G12940		Leucine-rich repeat (LRR) family protein	15	15	45.6	45.6	39.952	110.31	204960000	216690000	180800000	36993000	42722000	40984000
AT5G12040		unknown	4	4	13.6	13.6	40.33	65.688	36690000	30686000	36310000	44545000	36894000	45560000
AT5G11880	DAPDC2	meso-diaminopimelate decarboxylase 2	5	5	12.5	12.5	54.163	13.543	22037000	20950000		22030000	19324000	22412000
AT5G11720	AGLU1	alpha-glucosidase	28	27	36.7	35.9	101.12	323.31	353910000	356340000	362910000	427500000	408900000	432650000
AT5G11670	NADP-ME2	NADP-malic enzyme 2	14	14	38.1	38.1	64.412	134.44	78590000	57982000	76154000	80015000	72725000	73866000
AT5G11420		Encodes a DUF642 cell wall protein	12	6	32.2	13.7	39.64	29.287	1459000000	1576700000	1524900000	1233400000	1193300000	1068200000
AT5G10770		Eukaryotic aspartyl protease family protein	8	8	24.5	24.5	49.864	323.31	163330000	154150000	142470000	174280000	202010000	161850000
AT5G10760	AED1	APOPLASTIC, EDS1-DEPENDENT 1 (Eukaryotic aspartyl protease family protein)	2	2	8.2	8.2	49.473	28.749	128500000		163110000	185400000	184580000	194900000
AT5G10560		Glycosyl hydrolase family protein	24	23	34.1	33.2	87.184	323.31	623280000	616440000	620800000	914360000	879890000	808210000
AT5G10450	GRF6	G-box regulating factor 6	9	4	38.2	17.1	27.718	46.904	57512000	52818000	58680000	47388000	43393000	39263000
AT5G09760		Pectin methylesterase inhibitor	11	11	30.1	30.1	60.438	323.31	489560000	410680000	396150000	468590000	433220000	425080000
AT5G09730	BX3	beta-xylosidase 3	12	7	17.9	11.3	83.221	104.85	127160000	172140000	138490000	151750000	162480000	153150000
AT5G09660	PMDH2	peroxisomal NAD-malate dehydrogenase 2	9	9	45.3	45.3	34.975	242.86	100120000	114610000	110460000	86568000	85387000	88718000
AT5G09650	PPa6	pyrophosphorylase 6	9	9	35	35	33.38	167.21	461970000	518570000	423110000	485280000	447090000	451190000
AT5G09440	EXL4	EXORDIUM like 4	8	7	30.6	27.3	29.474	153.03	297000000	315810000	304940000	328140000	342890000	314850000
AT5G08380	AGAL1	alpha-galactosidase 1	17	17	51.2	51.2	45.709	323.31	2154000000	2145500000	2169600000	2486300000	2543400000	2695400000
AT5G08370	AGAL2	alpha-galactosidase 2	23	23	64.9	64.9	41.138	323.31	1402500000	1373500000	1396800000	1749800000	1730800000	1750900000
AT5G08280	HEMC	hydroxymethylbilane synthase	12	12	33.8	33.8	41.043	36.051	82091000	108290000	80327000	65311000	84892000	70284000
AT5G08260	scpl35	serine carboxypeptidase-like 35	10	10	22.1	22.1	53.607	259.19	201540000	199200000	177740000	222430000	251910000	219010000
AT5G07830	GUS2	glucuronidase 2	13	12	35.7	34.3	60.25	291.09	738770000	705370000	803380000	1362600000	1390400000	1437600000
AT5G07440	GDH2	glutamate dehydrogenase 2	7	5	22.6	17.3	44.699	22.316	44491000	43037000	39293000	56906000	45957000	42763000
AT5G07360		Amidase family protein	5	5	12.3	12.3	72.233	33.12	56847000	43919000	48703000	60204000	69863000	62971000
AT5G07030		Eukaryotic aspartyl protease family protein	10	10	27	27	48.694	76.683	122330000	154120000	115110000	21907000	24190000	21819000
AT5G06870	PGIP2	polygalacturonase inhibiting protein 2	10	10	41.8	41.8	37.067	46.81	192780000	201840000	173810000	83339000	90589000	74134000
AT5G06860	PGIP1	polygalacturonase inhibiting protein 1	6	6	21.8	21.8	36.689	68.071	150860000	142160000	152170000	135340000	148250000	150450000
AT5G06720	PRX53	peroxidase 53	6	6	20	20	34.989	104.06	450720000	437580000	449940000	418350000	404750000	489090000
AT5G06290	2CPB	2-cysteine peroxiredoxin B	8	3	44.7	20.5	29.78	41.322	110870000	113360000	114060000		82760000	91039000
AT5G05340	PRX52	peroxidase 52	11	11	64.5	64.5	34.215	323.31	284850000	301080000	299840000	554140000	551630000	624470000
AT5G04590	SIR	sulfite reductase	4	4	10	10	71.949	25.934	25953000	32202000	21285000	24958000	23945000	33124000
AT5G04140	GLS1	glutamate synthase 1	57	47	48.8	41.9	176.75	323.31	339390000	337200000	343380000	376540000	375730000	391150000
AT5G03350	SAI-LLP1	SA-induced legume lectin-like protein 1	7	6	36.9	33.9	30.162	323.31	2373000000	2113800000	2838100000	1251800000	1338200000	1194600000
AT5G03260	LAC11	laccase 11	2	2	4.7	4.7	61.747	4.1773	11239000	10594000		9774200
AT5G02790	GSTL3	Glutathione transferase L3	6	6	31.1	31.1	27.09	39.743	38744000	32707000	33539000	35826000	34629000	32648000
AT5G02500	HSP70-1	heat shock cognate protein 70-1	15	3	29.8	9.2	71.357	84.878	114960000	146430000	103300000	74793000	81595000	89586000
AT5G02240		unknown	6	5	36.8	34	27.103	80.562	66482000	68913000	68587000	72249000	68842000	70037000
AT4G39970		unknown	5	5	23.4	23.4	34.655	25.515	24521000	20087000		35820000	36917000	33911000
AT4G39640	GGT1	gamma-glutamyl transpeptidase 1	21	21	36.2	36.2	61.189	185.87	492940000	527750000	484860000	232430000	228210000	217710000
AT4G39330	CAD9	cinnamyl alcohol dehydrogenase 9	5	5	18.9	18.9	38.933	32.859	49976000	51200000	55578000	26705000	27314000	34662000
AT4G38970	FBA2	fructose-bisphosphate aldolase 2	17	9	50.3	29.4	42.987	323.31	1415900000	1278000000	1305400000	1344900000	1408700000	1394900000
AT4G38740	ROC1	rotamase CYP 1	5	4	29.7	25.6	18.373	13.857	150010000	208900000	174520000	142720000	144940000	166990000
AT4G38220	AQI	aquaporin interactor	4	4	15.6	15.6	47.739	31.045	23365000			26630000	24925000
AT4G37930	STM, SHMT1, SHM1	serine transhydroxymethyltransferase 1	20	20	43.5	43.5	57.4	323.31	414490000	392270000	418480000	462610000	449610000	474060000
AT4G37800	XTH7	xyloglucan endotransglucosylase/hydrolase 7	13	12	56.7	53.9	33.681	323.31	2319200000	2489300000	2420000000	1919000000	1932400000	2023700000
AT4G37530		Peroxidase superfamily protein	13	12	45	41.3	35.989	323.31	423600000	447700000	445220000	478290000	498340000	466960000
AT4G37520		Peroxidase superfamily protein	11	10	37.4	33.7	36.076	155.81	70817000	84750000	71043000	81516000	83064000	82539000
AT4G37000	ACD2, ATRCCR	ARABIDOPSIS THALIANA RED CHLOROPHYLL CATABOLITE REDUCTASE, ACCELERATED CELL DEATH 2	6	6	21.6	21.6	36.448	31.115	20974000	15237000	23932000	21859000		21869000
AT4G36945		PLC-like phosphodiesterases superfamily protein	6	6	16.2	16.2	44.331	18.429	58514000	73813000	52479000	59505000	65901000	66344000
AT4G36760	APP1	aminopeptidase P1	6	6	12.2	12.2	71.696	46.991	11398000		12379000	12209000	14846000	10851000
AT4G36195		Serine carboxypeptidase S28 family protein	16	10	37.1	26.4	54.773	264.37	86918000	100070000	93345000	114620000	116020000	112990000
AT4G35830	ACO1	aconitase 1	17	12	22.7	16.3	98.151	75.474	135560000	165830000	156360000	142800000	153230000	137640000
AT4G35350	XCP1	xylem cysteine peptidase 1	3	2	13.5	9.9	39.617	25.796		51946000			45615000	60173000
AT4G35220	CYCLASE2	CYCLASE2	7	6	25.7	23.2	29.987	43.213	144250000	193950000	139530000	216520000	223140000	222910000
AT4G35090	CAT2	catalase 2	14	7	40.1	23.8	54.994	92.213	144700000	141250000	139000000	187910000	180440000	164050000
AT4G34980	SLP2	subtilisin-like serine protease 2	8	8	13	13	81.045	76.606	29972000	30396000	30122000	15922000	13660000	13384000
AT4G34480		O-Glycosyl hydrolases family 17 protein	7	7	17.9	17.9	53.121	36.608	131260000	125600000	120390000	157010000	155770000	164920000
AT4G34260	AXY8	ALTERED XYLOGLUCAN 8	29	29	39.1	39.1	93.724	323.31	421880000	456260000	398330000	353590000	354860000	334780000
AT4G34180	CYCLASE1	CYCLASE1	11	10	44.3	41.6	28.384	190.83	900620000	1002100000	949020000	1368300000	1359100000	1309000000
AT4G33810		Glycosyl hydrolase superfamily protein	11	10	26.3	24.6	60.443	220.01	612910000	505820000	590460000	478770000	460190000	458450000
AT4G33680	AGD2	ABERRANT GROWTH AND DEATH 2	9	9	29.9	29.9	50.396	198.97	105650000	89026000	120460000	135830000	147630000	135860000
AT4G33640		unknown	4	4	49.5	49.5	10.42	5.3923	15267000		15078000		12819000
AT4G33420	Prx47	Peroxidase 47	11	11	45.8	45.8	35.975	323.31	128260000	113250000	140100000	175170000	164430000	192640000
AT4G33220	PME44	pectin methylesterase 44	13	9	27.8	20.6	58.499	202.32	483560000	552750000	477610000	509740000	526290000	435750000
AT4G33090	APM1	aminopeptidase M1	15	15	22.8	22.8	98.178	78.057	43478000	44792000	50580000	48686000	50007000	43982000
AT4G33010	GLDP1	glycine decarboxylase P-protein 1	25	17	32.8	23.3	112.92	323.31	344650000	338630000	359190000	387060000	425700000	399620000
AT4G32520	SHM3	serine hydroxymethyltransferase 3	2	2	3.8	3.8	57.982	1.8786	14152000			15431000	14661000
AT4G31990	ASP5	aspartate aminotransferase 5	14	13	44.4	42.4	49.324	131.57	118880000	130320000	130680000	150840000	145160000	155530000
AT4G31840	ENODL15	early nodulin-like protein 15	4	4	23.7	23.7	18.961	32.499	79608000	125660000	92573000	103180000	108210000	128370000
AT4G31300	PBA1		5	5	23.2	23.2	25.151	112.49	49361000	60373000	49415000	61101000	55044000	47368000
AT4G31140		O-Glycosyl hydrolases family 17 protein	7	7	17.6	17.6	52.715	60.967	111060000	123910000	107510000	160790000	159910000	154990000
AT4G30920	LAP2	leucyl aminopeptidase 2	11	2	26.8	7.2	61.306	80.803	27819000	27251000	27841000	32131000	32737000	32002000
AT4G30530	GGP1	gamma-glutamyl peptidase 1	2	2	12	12	28.385	6.1902	11233000		14412000		12263000
AT4G30270	MERI5B	MERISTEM 5	12	10	48.7	39.4	30.755	323.31	7743400000	7572900000	7715300000	12371000000	12371000000	13418000000
AT4G29740	CKX4	cytokinin oxidase 4	2	2	5.2	5.2	58.061	4.5064		43769000	41022000		30661000	33864000
AT4G29700		unknown	5	5	11.9	11.9	51.587	18.992	35865000	44276000	40333000	54658000	51273000	44362000
AT4G29680		Alkaline-phosphatase-like family protein	8	8	14.7	14.7	54.678	39.012	228140000	212820000	219530000	344870000	384110000	312550000
AT4G29350	PFN2	profilin 2	4	4	38.9	38.9	13.998	121.23	166790000	131330000	140890000	108850000	88302000	103390000
AT4G29270		unknown	5	5	19.5	19.5	28.746	6.1217		31436000		32484000
AT4G29260	VSP3	Vegetative Storage Protein 3	4	4	22.4	22.4	28.906	50.594	37327000	39498000	28082000	23574000	19158000	24006000
AT4G29060	emb2726	embryo defective 2726	4	4	5.4	5.4	103.78	6.3838		34972000	39338000			31975000
AT4G27520	ENODL2	early nodulin-like protein 2	6	6	16	16	35.064	167	618620000	756030000	658240000	698380000	653970000	581860000
AT4G26840	SUMO1	SMALL UBIQUITIN-LIKE MODIFIER 1	3	2	45	35	10.976	59.136	96921000	107480000	98877000	85329000	106690000	97803000
AT4G26690	GPDL2	GLYCEROPHOSPHODIESTERASE-LIKE 2	11	10	18.6	17.3	82.561	54.131	66895000	62677000	64210000	66611000	78032000	69416000
AT4G26630	DEK3	DEK-domain containing protein 3	3	3	3.9	3.9	85.248	51.849	29359000	35158000	28401000	24852000	28334000	29162000
AT4G26530	FBA5	fructose-bisphosphate aldolase 5	5	3	18.4	12.3	38.293	24.135	71093000	62405000	65437000	47322000	49077000	58497000
AT4G26140	BGAL12	beta-galactosidase 12	19	9	31.4	20.8	80.117	323.31	409520000	335280000	468820000	591430000	603840000	640310000
AT4G25900		unknown	19	19	57.5	57.5	36.251	323.31	3066700000	2887000000	3024300000	3452800000	3348700000	3252500000
AT4G25720	QCT	GLUTAMINYL CYCLOTRANSFERASE	4	4	18.7	18.7	30.907	55.888	133360000	129380000	106560000	124840000	103420000	139930000
AT4G25260	PMEI7	Pectin Methylesterase Inihibitor 7	4	4	32.8	32.8	22.173	66.413	41722000	48935000	39965000	34045000	37123000	29573000
AT4G25130	MSRA4	methionine sulfoxide reductase A4	5	5	27.1	27.1	28.644	32.168	54450000	56300000	55914000	47683000	50068000	42506000
AT4G25100	FSD1	Fe superoxide dismutase 1	6	6	31.1	31.1	23.791	55.858	140000000	149100000	147800000	211170000	144670000	154160000
AT4G25000	AMY1	alpha-amylase-like	11	11	30.3	30.3	47.377	108.34	138410000	138600000	125690000	211310000	191930000	215520000
AT4G24780	PLL19	Encodes a pectate lyase involved in response to nematodes	8	6	22.5	18.6	45.013	137.33	63990000	95659000	70320000	33483000	34739000	40750000
AT4G24770	RBP31	ARABIDOPSIS THALIANA RNA BINDING PROTEIN	3	3	8.2	8.2	35.787	5.8479	56293000	48899000	29261000	22327000		18037000
AT4G24620	PGI1	phosphoglucose isomerase 1	8	8	16.5	16.5	67.048	53.697		28392000	22775000	30213000	33556000	34725000
AT4G24430		unknown	8	8	17.2	17.2	73.608	45.838	44871000	34985000	37561000	42255000	41257000	44291000
AT4G24350		Phosphorylase superfamily protein	9	9	35.1	35.1	36.696	198.31	272310000	310250000	296500000	237670000	233040000	242500000
AT4G24040	TRE1	trehalase 1	6	6	17.7	17.7	71.354	110.18	32568000	39181000	28051000	34272000	40584000	36086000
AT4G23820	PGF13	Pectin lyase-like superfamily protein	9	9	31.1	31.1	48.635	82.587	254320000	269120000	253060000	132380000	140210000	141170000
AT4G23690	DIR6	dirigent protein 6	3	3	21.9	21.9	21.412	103.54	85308000	67929000	98219000	59370000	64372000	71539000
AT4G23670		Polyketide cyclase/dehydrase and lipid transport superfamily protein	8	8	68.2	68.2	17.518	150.75	227100000	230590000	202770000	140810000	125830000	160060000
AT4G23600	JR2	JASMONIC ACID RESPONSIVE 2	17	17	50.2	50.2	47.038	110.81	93958000	90230000	95104000	173740000	173630000	170310000
AT4G23500	PGF12	Polygalacturonase Clade F 12	7	7	25.1	25.1	54.69	323.31	76204000	90007000	72027000	70712000	74116000	75044000
AT4G23170	CRK9	CYSTEINE-RICH RLK (RECEPTOR-LIKE PROTEIN KINASE) 9	6	6	32.8	32.8	29.722	323.31	2074700000	1678700000	1910600000	3415900000	3132900000	3016600000
AT4G23100	CAD2	cinnamyl alcohol dehydrogenase homolog 2	5	5	13.4	13.4	58.562	45.217	29498000	29433000	32720000	36239000	36998000	36036000
AT4G21650	SBT3.13	subtilase 3.13	14	12	27	22.6	81.479	323.31	287430000	276460000	281790000	79945000	81442000	76485000
AT4G21280	PSBQ-1, PSBQA, PSBQ	PHOTOSYSTEM II SUBUNIT Q	3	3	17	17	23.795	21.972	35917000	45747000	37053000	43792000	36471000	38756000
AT4G20860	BBE22	Berberine Bridge Enzyme 22	24	24	42.1	42.1	60.409	323.31	860570000	949370000	871750000	1108600000	1079300000	1146500000
AT4G20840	OGOX2	oligogalacturonide oxidase 2	27	26	51.4	49.9	60.143	323.31	508300000	590140000	531630000	731050000	745660000	729410000
AT4G20830	OGOX1	oligogalacturonide oxidase 1	29	24	51.1	45.2	60.286	323.31	1795700000	2059600000	1936400000	2502000000	2519700000	2584500000
AT4G20260	ATPCAP1	ARABIDOPSIS THALIANA PLASMA-MEMBRANE ASSOCIATED CATION-BINDING PROTEIN 1	17	17	39.1	39.1	24.584	323.31	795010000	1018300000	878830000	791450000	808240000	795900000
AT4G19810	ChiC	class V chitinase	9	9	31.7	31.7	41.128	201.78	400230000	465210000	391860000	366120000	353670000	364530000
AT4G19420	PAE8	pectin acetylesterase 8	5	5	14.9	14.9	44.439	9.0068	31302000	37936000	40989000	36360000	28333000	34243000
AT4G19410	PAE7	pectin acetylesterase 7	20	16	64.5	51.4	42.125	323.31	4821300000	5578100000	5030700000	2989500000	2770500000	2905500000
AT4G18970	GGL22	GDSL-motif lipase	10	10	49.6	49.6	39.598	291.94	448400000	412170000	403850000	283610000	287030000	315770000
AT4G18760	SNC2	suppressor of npr1-1, constitutive 2	5	5	17.4	17.4	46.07	31.157	28867000	27669000	28520000	34421000	35901000	38435000
AT4G18670	LRX5	leucine-rich repeat extensin 5	6	3	7.7	4.2	90.835	13.789	47609000	49472000	40675000	37212000	39696000	36521000
AT4G18253		receptor Serine/Threonine kinase-like protein	2	2	10.7	10.7	27.016	5.968	123970000	139270000	117340000		136650000	144690000
AT4G16760	ACX1	acyl-CoA oxidase 1	4	4	7.8	7.8	74.301	7.9667			17699000	23148000	19864000	21560000
AT4G16500	CYS4	phytocystatin 4	6	6	40.2	40.2	12.556	28.599	4067100000	5177200000	4228300000	4422200000	4949900000	5314600000
AT4G16155		unknown	14	14	32.6	32.6	60.144	102.93	63987000	70948000	67091000	62837000	66811000	69856000
AT4G15530	PPDK	pyruvate orthophosphate dikinase	5	5	10	10	93.379	14.86		11603000	12190000	19923000	13712000
AT4G15210	AT-BETA-AMY, ATBETA-AMY, BMY1, RAM1, BAM5	beta-amylase 5	9	9	35.3	35.3	50.142	232.88	52966000	53691000	51729000	58280000	53154000	45952000
AT4G14880	OASA1	O-acetylserine (thiol) lyase (OAS-TL) isoform A1	7	7	36.3	36.3	33.805	109.28	341130000	312960000	314730000	300940000	290800000	318570000
AT4G13930	SHM4	serine hydroxymethyltransferase 4	7	7	18.5	18.5	51.717	127.61	45129000	44529000	46231000	69929000	64962000	66775000
AT4G13360		unknown	4	4	12.8	12.8	46.25	4.9649	23229000	21984000				37645000
AT4G13340	LRX3	leucine-rich repeat/extensin 3	9	3	12.1	4.2	82.245	74.181	173920000	217330000	171660000	161570000	143250000	145270000
AT4G13080	XTH1	xyloglucan endotransglucosylase/hydrolase 1	2	2	8.1	8.1	33.62	2.7403		50095000				22647000
AT4G12910	scpl20	serine carboxypeptidase-like 20	15	15	29.4	29.4	55.832	323.31	742220000	793010000	738130000	687500000	709910000	691470000
AT4G12880	ENODL19	early nodulin-like protein 19	5	5	40.8	40.8	12.01	62.443	478830000	552570000	573310000	311070000	323230000	325250000
AT4G12730	FLA2	FASCICLIN-like arabinogalactan 2	7	7	27	27	43.448	323.31	379080000	309730000	380450000	425910000	445840000	436540000
AT4G12420	SKU5		9	9	17.2	17.2	65.637	137.45	143050000	163610000	135580000	193200000	185210000	170830000
AT4G12290	CuAO	Copper Amine Oxidase	2	2	2.8	2.8	75.318	3.8494		9031800	8467100	13774000	10640000	9452500
AT4G12060	ClpT2		3	3	14.9	14.9	26.56	10.916	37929000	132470000		29620000
AT4G11521		Receptor-like protein kinase-related family protein	4	4	12.5	12.5	29.583	9.6519	23881000	30031000	23265000	34415000	34311000	34777000
AT4G11290	PER39	PEROXIDASE 39	14	11	55.2	49.7	35.6	323.31	339330000	287480000	355400000	294210000	306810000	341830000
AT4G11010	NDPK3	nucleoside diphosphate kinase 3	4	4	18.1	18.1	25.734	11.507	49080000	42900000	53665000	53005000	53434000	57884000
AT4G10300	TRR14		4	4	33.6	33.6	14.937	21.862	251370000	299820000	236320000	391920000	356230000	366550000
AT4G09670		Oxidoreductase family protein	5	5	17.1	17.1	39.562	13.355	36222000	27061000	28005000	29020000	26955000	27851000
AT4G09320	NDK1	nucleoside diphosphate kinase 1	6	6	41.6	41.6	16.5	217.45	228340000	254820000	211380000	136600000	134400000	152640000
AT4G09000	GRF1	general regulatory factor 1	12	6	47.6	26.6	29.931	192.15	157370000	161950000	153480000	127140000	128240000	134600000
AT4G08870	ARGAH2	arginine amidohydrolase 2	8	6	38.4	33.4	37.98	99.265	96477000	94224000	96862000	161120000	148930000	138650000
AT4G08390	SAPX	stromal ascorbate peroxidase	4	4	22.4	22.4	40.279	16.754	34161000	29414000	27178000	27336000		26074000
AT4G03520	TRXm2	thioredoxin m2	5	5	70.8	70.8	7.9261	138.18	204980000	269220000	241390000	273510000	345350000	286650000
AT4G02520	GSTF2	glutathione S-transferase PHI 2	8	8	45.3	45.3	24.128	84.387	82019000	72293000	73290000	83267000	85966000	72337000
AT4G02510	PPI2	PLASTID PROTEIN IMPORT 2	4	4	3.8	3.8	160.82	121.84	35093000	41257000	31780000	29684000	35568000	20077000
AT4G01610	AtcathB3	Cathepsin B-like protease 3	2	2	9.2	9.2	39.344	4.4707	24067000	22988000			21682000	18980000
AT4G01130		GDSL-motif lipase	5	5	12.3	12.3	42.013	149.07	197980000	157790000	163760000	105770000	101170000	90398000
AT3G63190	cpRRF	chloroplast ribosome recycling factor	9	9	33.8	33.8	30.422	174.8	245130000	301590000	263780000	307740000	279310000	303850000
AT3G63140	CSP41A	chloroplast stem-loop binding protein of 41 kDa	11	11	36.7	36.7	43.929	256.55	216910000	207860000	175930000	197680000	202480000	198060000
AT3G62410	CP12-2	CP12 domain-containing protein 2	6	6	51.9	51.9	14.167	150.58	271920000	278850000	256220000	199890000	191650000	211900000
AT3G62110	PGF10	Polygalacturonase Clade F 10	6	6	15.1	15.1	51.996	55.456	63238000	78840000	47835000	71289000	60796000	62744000
AT3G62060	PAE6	pectin acetylesterase 6	8	8	34.1	34.1	46.479	271.45	98116000	92931000	96369000	137640000	134540000	123110000
AT3G62030	ROC4	rotamase CYP 4	8	7	30.9	28.2	28.079	42.331	2623600000	2909400000	2832200000	2142500000	2237800000	2312400000
AT3G62020	GLP10	germin-like protein 10	5	4	23.6	15.2	20.323	91.776	1029500000	1139400000	1084300000	930360000	900440000	1003400000
AT3G61440	CYSC1	cysteine synthase C1	4	4	12.8	12.8	39.927	73.848	26483000	35572000	34325000	40648000	44074000	41703000
AT3G61260	REM1.2	REMORIN 1.2	1	1	14.6	14.6	23.144	19.809	85223000		70808000	79918000	59780000	62676000
AT3G60820	PBF1		4	4	24.2	24.2	24.644	28.561	43298000	49128000	45478000	48622000	52934000	44674000
AT3G60750	AtTKL1, TKL1	transketolase 1	15	15	30	30	79.838	198.75	60629000	58018000	64649000	62524000	66399000	66666000
AT3G59970	MTHFR1	methylenetetrahydrofolate reductase 1	3	3	9.8	9.8	45.612	28.457	35534000			29332000
AT3G59920	GDI2	RAB GDP dissociation inhibitor 2	6	5	15.8	11.7	49.538	24.968		35282000	31200000	25263000	29394000	32907000
AT3G59010	PME35	pectin methylesterase 35	5	5	10.6	10.6	57.513	115.28	42237000	49693000	41775000	38065000	42991000	33399000
AT3G58610		unknown	7	7	13.9	13.9	63.812	44.884	75365000	77842000	74829000	77024000	78678000	70179000
AT3G57610	ADSS	adenylosuccinate synthase	10	10	31.2	31.2	52.964	76.096	47519000	44551000	50239000	45995000	54049000	46779000
AT3G57410	VLN3	villin 3	5	4	10.1	8.7	106.35	26.877	33938000	23817000	27929000	26736000	28122000
AT3G57260	PR2	PATHOGENESIS-RELATED PROTEIN 2	13	13	46	46	37.338	323.31	1372600000	1340100000	1427400000	1758700000	1831300000	1853100000
AT3G57240	BG3	beta-1,3-glucanase 3	13	13	59.8	59.8	37.631	323.31	300700000	248610000	315220000	398010000	442380000	462830000
AT3G56310	AGAL3	Alpha-GALACTOSIDASE 3	3	3	9.8	9.8	48.362	94.895	43863000	52930000	52221000	28014000	34786000	26212000
AT3G56060		Glucose-methanol-choline (GMC) oxidoreductase family protein	9	8	14	12.7	63.357	20.852	66038000	71698000	62039000	60173000	60498000	55436000
AT3G55800	SBPASE	sedoheptulose-bisphosphatase	16	16	52.2	52.2	42.414	231.12	577860000	602140000	544780000	625080000	645750000	661430000
AT3G55440	TPI	CYTOSOLIC TRIOSE PHOSPHATE ISOMERASE	9	9	53.9	53.9	27.169	138.59	384370000	390830000	371700000	311110000	280850000	312380000
AT3G55430		O-Glycosyl hydrolases family 17 protein	7	7	18	18	48.442	28.08	136880000	140510000	126350000	93519000	86843000	90091000
AT3G55330	PPL1	PsbP-like protein 1	8	8	38.7	38.7	25.623	65.64	207810000	254700000	229540000	331030000	384640000	332680000
AT3G55260	HEXO1, ATHEX2	beta-hexosaminidase 1	9	8	18.1	16.6	61.229	65.728	140550000	155530000	140120000	122680000	110040000	123340000
AT3G54660	GR	glutathione reductase	11	11	23.9	23.9	60.852	32.232	61445000	75896000	74863000	68434000	70218000	78054000
AT3G54420	ATCHITIV	homolog of carrot EP3-3 chitinase	6	6	29.3	29.3	29.436	323.31	628450000	649250000	622300000	591240000	595910000	503470000
AT3G54400		Eukaryotic aspartyl protease family protein	11	11	37.4	37.4	45.475	298.11	6637500000	6861900000	6528800000	7137800000	6771100000	7306400000
AT3G54050	HCEF1, cfbp1	high cyclic electron flow 1	12	12	36	36	45.161	323.31	279620000	280230000	288120000	300430000	307120000	288910000
AT3G52960	PrxIIE	peroxiredoxin-II-E	6	6	32.5	32.5	24.684	93.949	116820000	104800000	101890000	90045000	88324000	78498000
AT3G52930	FBA8	fructose-bisphosphate aldolase 8	11	6	42.7	23.5	38.539	323.31	119500000	119180000	110590000	88617000	91334000	91908000
AT3G52880	MDAR1	monodehydroascorbate reductase 1	12	12	36.4	36.4	46.487	182.8	115250000	115680000	118820000	140780000	142350000	124410000
AT3G52840	BGAL2	beta-galactosidase 2	27	19	41.7	32.3	82.014	323.31	942100000	917850000	940810000	1211700000	1287700000	1350400000
AT3G51800	EBP1	ERBB-3 BINDING PROTEIN 1	4	4	13	13	42.295	15.275			30570000	25670000		33004000
AT3G51260	PAD1	20S proteasome alpha subunit PAD1	7	7	37.6	37.6	27.337	22.655	69167000	46257000	56927000	69742000	54725000	55138000
AT3G49680	BCAT3	branched-chain aminotransferase 3	3	3	8.5	8.5	44.731	21.02	28265000	21981000	24757000	22953000	26584000	25822000
AT3G49220	PME34	Pectin Methylesterase 34	5	4	8.7	7.5	65.306	10.881	28209000	33014000	32880000	40276000	34359000	39731000
AT3G49120	PRX34, PRXCB, ATPCB, AtPRX34, PERX34, ATPERX34	PEROXIDASE 34	10	8	30	27.2	38.832	77.899	569370000	598280000	535020000	537020000	538960000	557130000
AT3G48990	AAE3	ACYL-ACTIVATING ENZYME 3	6	6	13	13	55.544	16.264	22660000	22494000	14304000	15708000		11777000
AT3G48870	ClpC2	ClpC2	4	4	6.7	6.7	102.24	17.84	95849000	61527000	100160000	53556000	46362000	54975000
AT3G48730	GSA2	glutamate-1-semialdehyde 2,1-aminomutase 2	10	4	31.4	12.7	50.141	82.876	225920000	227740000	216590000	224680000	234860000	245190000
AT3G48460	SFAR4	SEED FATTY ACID REDUCER 4	8	8	21.8	21.8	42.235	120.42	274870000	278920000	233820000	365960000	372850000	349850000
AT3G48420		unknown	9	9	33.9	33.9	34.245	90.861	130720000	107930000	128120000	154700000	154180000	152750000
AT3G47800		unknown	3	3	14.5	14.5	39.714	10.038	30334000	27289000	28516000	35359000	35548000	35764000
AT3G46970	PHS2	alpha-glucan phosphorylase 2	11	11	19.6	19.6	95.158	159.27	16856000	11816000	16594000	28978000	44651000	51610000
AT3G46550	FLA4	fasciclin-like arabinogalactan-protein 4	6	6	23.1	23.1	44.238	323.31	248520000	245310000	267860000	452720000	461120000	487010000
AT3G45970	EXPL1	expansin-like A1	14	12	56.3	48.7	25.925	323.31	1603700000	1520600000	1573100000	1609100000	1620100000	1608300000
AT3G45300	IVD	isovaleryl-CoA-dehydrogenase	4	4	12	12	44.773	12.878	19938000	15512000			20674000	23069000
AT3G45010	scpl48	serine carboxypeptidase-like 48	12	12	34.7	34.7	56.895	323.31	316580000	337280000	344830000	290050000	271570000	284790000
AT3G44310	NIT1	nitrilase 1	5	5	21.1	21.1	38.152	10.902	26498000	30133000	34185000			21979000
AT3G44100		MD-2-related lipid recognition domain-containing protein	2	2	18.4	18.4	16.07	7.4422	211620000	248620000	207550000	99398000		66725000
AT3G43670	CuAOgamma2	COPPER AMINE OXIDASE GAMMA 2	6	6	11.4	11.4	77.532	21.593	43198000	40892000	45401000	45788000	37018000	40351000
AT3G28940		AIG2-like (avirulence induced gene) family protein	6	6	42	42	19.465	63.998	80443000	64146000	62363000	58026000	49061000	48653000
AT3G28200		unknown	10	10	38	38	35.302	132.35	265230000	272380000	258630000	168830000	157190000	171080000
AT3G27850	RPL12-C	ribosomal protein L12-C	3	3	16.6	16.6	19.682	52.71			58353000		46965000
AT3G27430	PBB1	Proteasome subunit beta type-7-A	2	2	7.5	7.5	28.811	3.2228	37874000	46120000	42039000	35775000	45097000
AT3G26720		Glycosyl hydrolase family 38 protein	31	31	40.8	40.8	115.22	323.31	672950000	657660000	688780000	681900000	675070000	682810000
AT3G26380	APSE	ARAPASE	22	22	41.7	41.7	72.342	323.31	389690000	340580000	364080000	544060000	553670000	548380000
AT3G26060	PRXQ	peroxiredoxin Q	7	7	53.2	53.2	17.028	62.427	217140000	240560000	213510000	191590000	189580000	186250000
AT3G25530	GLYR1	glyoxylate reductase 1	4	4	20.1	20.1	30.691	13.58	38083000	40474000	34383000	54918000	47522000	36939000
AT3G24170	GR1	glutathione-disulfide reductase	9	9	32.7	32.7	53.87	93.325	55629000	37701000	53988000	53735000	61813000	51168000
AT3G23940	DHAD	Dihydroxyacid dehydratase	7	7	12.4	12.4	64.713	41.328	32316000	32410000	34336000	27914000	29303000	28913000
AT3G23600		alpha/beta-Hydrolases superfamily protein	6	6	43.2	43.2	25.563	145.23	62262000	56705000	44453000	53804000	56721000	53498000
AT3G23570		alpha/beta-Hydrolases superfamily protein	2	2	14.6	14.6	26.53	124.46			19832000	24004000		26846000
AT3G22630	PBD1	20S proteasome beta subunit D1	4	1	22.1	5.4	22.54	5.8036	38023000	41610000	32174000	33306000	44147000
AT3G22200	POP2	POLLEN-PISTIL INCOMPATIBILITY 2	3	3	6.9	6.9	55.187	6.4178		12415000		22277000	23491000
AT3G22110	PAC1	20S proteasome alpha subunit C1	7	7	31.2	31.2	27.475	52.738	43076000	47760000	45840000	46299000	41470000	39678000
AT3G22060		unknown	11	11	46.4	46.4	27.863	230.03	4034800000	3909400000	3883900000	4248500000	4369600000	4296100000
AT3G21160	MANIA	ALPHA-MANNOSIDASE IA	3	3	9.6	9.6	45.809	9.8424	38714000					33914000
AT3G20820		Leucine-rich repeat (LRR) family protein	15	15	56.4	56.4	39.862	323.31	5330300000	4693700000	5517700000	3662300000	3826800000	3841900000
AT3G20390	RidA	Reactive Intermediate Deaminase A	8	8	47.6	47.6	19.816	108.93	399690000	428240000	420450000	411240000	395760000	403130000
AT3G19620		Glycosyl hydrolase family protein	30	29	46.6	45.5	85.499	323.31	2141700000	2244100000	2118400000	2589000000	2551000000	2715400000
AT3G19170	ATZNMP, ATPREP1, PREP1	presequence protease 1	27	27	29.6	29.6	121.01	249.1	117110000	121880000	112650000	128730000	140210000	127780000
AT3G18490	ASPG1	ASPARTIC PROTEASE IN GUARD CELL 1	13	13	38.8	38.8	53.233	323.31	673910000	537330000	634180000	1596000000	1560900000	1601100000
AT3G18080	BGLU44	B-S glucosidase 44	10	10	22.3	22.3	58.983	100.9	96137000	162130000	118040000		57836000
AT3G18060		unknown	11	11	26.6	26.6	66.041	37.639	35829000	28301000	32914000	37923000	30262000	31302000
AT3G16910	AAE7	acyl-activating enzyme 7	2	2	4.6	4.6	62.956	2.6418	18976000					16768000
AT3G16850	PGF5	Polygalacturonase Clade F 5	7	7	26.6	26.6	49.124	47.521	50854000	52350000	53204000	63712000	58074000	53049000
AT3G16640	TCTP1	translationally controlled tumor protein	7	7	53.6	53.6	18.91	46.818	413080000	466430000	403120000	311120000	350500000	271080000
AT3G16530		unknown	13	10	63	46.7	30.509	323.31	10007000000	8865700000	10742000000	11493000000	11814000000	11399000000
AT3G16470	JAL35	jacalin-related lectin 35	16	16	59.2	59.2	48.496	323.31	293070000	269220000	303960000	320420000	301450000	309310000
AT3G16460	JAL34	jacalin-related lectin 34	2	2	3	3	72.473	3.0553	14525000		14768000		12645000	13326000
AT3G16420	JAL30	JACALIN-RELATED LECTIN 30	5	3	25.8	17.1	32.158	131.03	119670000	123980000	108870000	114420000	115610000	92826000
AT3G16400	NSP1	nitrile specifier protein 1	13	3	30.4	7.2	51.669	245.01	172420000	203680000	173460000	206540000	213470000	204830000
AT3G16370	GGL19	GDSL-motif lipase	10	10	40.2	40.2	38.199	323.31	661780000	585210000	606510000	313060000	303830000	300130000
AT3G15730	PLD	phospholipase D alpha 1	12	12	20.9	20.9	91.847	77.809	47445000	47929000	51697000	50484000	45806000	42012000
AT3G15360	TRX-M4	thioredoxin M-type 4	5	5	21.8	21.8	21.172	91.834	581160000	744770000	611750000	878480000	1018000000	1068600000
AT3G15356		Legume lectin family protein	13	10	64.2	47.6	29.749	322.05	7676600000	7796700000	8128100000	7935800000	8126900000	8398200000
AT3G14990	DJ1A	DJ-1 homolog A	4	4	12.5	12.5	39.478	22.322	34930000	34980000	35823000	36703000	31080000	31743000
AT3G14930	HEME1	Uroporphyrinogen decarboxylase	6	6	23.2	23.2	38.268	25.749	47171000	46340000	39466000	49483000	51910000	48743000
AT3G14920		unknown	9	9	16.6	16.6	68.995	323.31	360060000	416490000	373220000	473370000	495920000	460170000
AT3G14850	TBL41	TRICHOME BIREFRINGENCE-LIKE 41	11	11	27.8	27.8	40.111	38.57	114280000	113130000	118910000	156280000	177060000	157260000
AT3G14420	GOX1	glycolate oxidase 1	14	6	45.2	16.6	40.3	40.437	118010000	117380000	112920000	122010000	131050000	115000000
AT3G14210	GOX1	glycolate oxidase 1	7	1	30.7	3	30.308	7.8557	148420000	145870000	136080000	143460000	134620000	130550000
AT3G14310	PME3	pectin methylesterase 3	9	8	18.2	17.1	64.255	115.1	151120000	177580000	149840000	73621000	83211000	61988000
AT3G14290	PAE2	20S proteasome alpha subunit E2	7	7	38.8	38.8	25.977	163.9	57490000	71255000	62741000	53609000	55015000	63567000
AT3G14210	ESM1	epithiospecifier modifier 1	9	3	30.1	11.5	44.06	323.31	534590000	505890000	513000000	587300000	596200000	652100000
AT3G14067	SASP	Senescence-Associated Subtilisin Protease	12	11	23.4	22.5	81.816	109.65	63451000	61635000	65524000	61281000	52913000	50181000
AT3G13790	CWI1	ARABIDOPSIS THALIANA CELL WALL INVERTASE 1	12	12	24.3	24.3	65.953	153.85	269620000	262240000	266430000	142190000	119040000	120350000
AT3G13750	BGAL1	beta galactosidase 1	23	21	39.6	37.9	93.658	323.31	782200000	761830000	787810000	1195300000	1139600000	1230400000
AT3G12780	PGK1	phosphoglycerate kinase 1	20	11	58.8	37	50.111	223.41	399170000	395910000	401820000	550250000	591830000	526040000
AT3G12700	NANA	Aspartic proteinase NANA	5	5	11.7	11.7	50.567	47.335	40929000	34393000	39274000		21759000	24760000
AT3G12580	HSP70	heat shock protein 70	17	7	35.5	17.5	71.101	209.14	604490000	634790000	581060000	621670000	648200000	636980000
AT3G12500	PR-3	PATHOGENESIS-RELATED 3, basic chitinase	3	3	13.1	13.1	36.183	59.191	32745000	31764000	36734000	60957000	51798000	50332000
AT3G12145	FLR1	FLORAL TRANSITION AT THE MERISTEM4	9	9	39.4	39.4	35.808	323.31	553960000	618750000	573100000	413270000	413660000	376420000
AT3G11630	2CPA	2-Cys peroxiredoxin A	8	3	45.9	21.1	29.092	109.52	351820000	271980000	328680000	247690000	254520000	259570000
AT3G10920	MSD1	Asuperoxide dismutase 1	4	4	24.3	24.3	25.344	75.927	145510000	124060000	123130000	133380000	134660000	125750000
AT3G10850	GLX2-2	GLYOXALASE 2-2	9	9	54.7	54.7	28.791	76.677	102040000	85884000	92578000	87855000	82732000	88086000
AT3G10740	ARAF1	alpha-L-arabinofuranosidase 1	26	26	48.2	48.2	75.044	323.31	3548500000	3180200000	3608200000	2663100000	2558500000	2785500000
AT3G10720	PMEI-PME25	PECTIN METHYL ESTERASE INHIBITOR-PECTIN METHYLESTERASE 25	6	5	13.4	12.3	67.956	40.587	104930000	83420000	92886000	77813000	74454000	68188000
AT3G10520	PGB2	phytoglobin2	5	5	37.3	37.3	17.871	37.072	46808000	50184000	65695000		105200000	56985000
AT3G09820	ADK1	adenosine kinase 1	6	1	22.7	4.4	37.836	64.038	179510000	158550000	175380000	140510000		169570000
AT3G09410	AtPAE5	Pectin Acetyesterase 5	2	2	5.6	5.6	44.023	2.8733		18995000	16644000	16770000	14012000	15854000
AT3G08770	LTP6	lipid transfer protein 6	3	3	27.4	27.4	11.878	18.033	80902000	117370000	86899000	63746000	69951000	70438000
AT3G08590	iPGAM2	2,3-biphosphoglycerate-independent phosphoglycerate mutase 2	14	10	37.9	23.9	60.763	44.483	56494000	51050000	56751000	62430000	66156000	60955000
AT3G08030	AthA2-1		16	16	55.1	55.1	39.065	323.31	3903900000	3698600000	4085900000	5683200000	5622000000	5710000000
AT3G07470		DUF538 protein	4	4	31.8	31.8	17.386	18.885	121300000	85713000	123720000		50730000	51675000
AT3G07390	AIR12	Auxin-Induced in Root cultures 12	5	5	18.3	18.3	27.926	82.226	583250000	596390000	529640000	589580000	698170000	604790000
AT3G05910	AtPAE12	Pectin Acetyesterase 12	16	16	48.2	48.2	46.326	323.31	1245000000	1314500000	1325300000	1167000000	1141900000	1155200000
AT3G05900		neurofilament protein-like protein	26	26	50.7	50.7	73.453	323.31	158810000	185760000	152140000	112420000	108780000	108290000
AT3G05625		Tetratricopeptide repeat (TPR)-like superfamily protein	3	3	15.6	15.6	21.848	5.4955	30524000	40017000	36363000		29031000	28595000
AT3G05180	GGL16	GDSL-motif lipase	11	11	26.9	26.9	42.344	323.31	243820000	232720000	222350000	339410000	362680000	343850000
AT3G04790	EMB3119	EMBRYO DEFECTIVE 3119	7	7	42	42	29.305	64.982	235720000	216960000	229120000	221180000	243880000	247860000
AT3G04720	PR-4	pathogenesis-related 4	2	2	11.3	11.3	22.936	6.026	235770000				376440000	295920000
AT3G04120	GAPC1	glyceraldehyde-3-phosphate dehydrogenase C subunit 1	12	2	45.6	8	36.914	289.98	114560000	116550000	121150000	129650000	125190000	130630000
AT3G03780	MS2	methionine synthase 2	30	12	43.1	18.4	84.583	220.55	146170000	144160000	134430000	140750000	145720000	143200000
AT3G03250	UGP1	UDP-GLUCOSE PYROPHOSPHORYLASE 1	13	7	35.2	18.4	51.115	55.653	140980000	152670000	146010000	156080000	158520000	148930000
AT3G02780	IDI2	isopentenyl pyrophosphate:dimethylallyl pyrophosphate isomerase 2	3	3	19	19	27.55	9.9608	31381000	27455000		26388000	29022000	25694000
AT3G02730	TRXF1	thioredoxin F-type 1	3	3	18	18	19.325	41.773	100380000	91404000	110030000	96388000	113610000	105160000
AT3G02230	RGP1	reversibly glycosylated polypeptide 1	6	3	17.6	12.3	40.629	17.401	43061000	34904000	38949000	29504000	31725000	31192000
AT3G01910	SOX	sulfite oxidase	8	8	24.7	24.7	43.329	32.659	52368000	62110000	51194000	73631000	64266000	57440000
AT3G01500	SABP3	SALICYLIC ACID-BINDING PROTEIN 3	13	6	61	26.3	28.198	323.31	2222500000	2455000000	2299800000	2651800000	2698800000	2407200000
AT3G01480	CYP38	cyclophilin 38	12	12	43.9	43.9	47.981	318.14	92403000	82963000	74573000	99666000	101410000	103230000
AT2G47400	CP12-1	CP12 domain-containing protein 1	3	3	49.2	49.2	13.487	294.9	275660000	201920000	219330000	205900000	188340000	186180000
AT2G47390	CGEP	chloroplast glutamyl peptidase	10	10	15	15	106.26	48.908	36684000	41950000	40695000	37154000	47495000	52625000
AT2G47010		calcium/calmodulin-dependent Serine/Threonine-kinase	5	4	13.2	11	55.05	16.24	16335000			20685000	22602000	25002000
AT2G46930	PAE3	pectin acetylesterase 3	15	15	53.1	53.1	45.944	323.31	700270000	700680000	672480000	957350000	985800000	1004700000
AT2G46760	GulLO6	L -gulono-1,4-lactone ( L -GulL) oxidase 6	13	11	29.4	26.2	66.281	208.42	182040000	199010000	213450000	183700000	195840000	189330000
AT2G46570	LAC6	laccase 6	6	6	12	12	63.9	17.035	33290000	49312000	44910000			28015000
AT2G45790	PMM	phosphomannomutase	3	3	12.2	12.2	27.761	11.482	11392000	7521100	10876000	12918000	10913000	9138500
AT2G45470	FLA8	FASCICLIN-like arabinogalactan protein 8	11	11	28.3	28.3	43.074	166.7	999550000	1071500000	987780000	1187100000	1164500000	1150800000
AT2G45220	PME17	pectin methylesterase 17	8	8	24.5	24.5	55.976	124.17	59548000	66313000	51639000	63335000	69517000	68896000
AT2G45180	DRN1	Lipid Transfer Protein 1	4	4	17.9	17.9	13.955	16.056	466190000	232710000	471850000	69436000	75214000	66727000
AT2G44920		unknown	6	6	36.2	36.2	23.778	264.13	77890000	94166000	83369000	113150000	100510000	112000000
AT2G44790	UCC2	uclacyanin 2	3	3	20.3	20.3	20.354	161.65	353510000	421940000	313410000	280960000	259490000	242930000
AT2G44350	CSY4	CITRATE SYNTHASE 4	3	3	8.2	8.2	52.654	9.3409		16584000		15130000	19237000	20630000
AT2G44260		DUF946 family protein	10	10	27.3	27.3	60.953	42.256	57764000	58138000	56016000	22729000	24724000	23866000
AT2G44100	GDI1	guanosine nucleotide diphosphate dissociation inhibitor 1	5	4	14.2	10	48.438	22.176	37049000	36664000	32682000	29271000	30535000	26782000
AT2G44050	COS1	COI1 SUPPRESSOR1	4	4	20.3	20.3	24.024	9.6985	45905000	32662000	43706000	45560000	41790000	44765000
AT2G43945		unknown	3	3	14.2	14.2	32.167	14.371	22444000	19227000	20693000	16835000	27505000	20230000
AT2G43910	ATHOL1	HARMLESS TO OZONE LAYER 1	6	6	36.9	36.9	24.096	81.458	87936000	108260000	89590000	85559000	75825000	85100000
AT2G43750	OASB	O-acetylserine (thiol) lyase B	7	7	31.1	31.1	41.656	47.834	86739000	91603000	93440000	101060000	88094000	91637000
AT2G43620		Chitinase family protein	10	10	48.4	48.4	30.377	211.88	272370000	284790000	284770000	310750000	296510000	341830000
AT2G43590		Chitinase family protein	5	5	29.2	29.2	28.353	290.77	375360000	495600000	427340000	547560000	498660000	491370000
AT2G43570	CHI	chitinase, putative	8	8	42.6	42.6	29.775	323.31	1035900000	1149400000	1042500000	1192300000	1137000000	1181300000
AT2G43510	ATTI1, TI1	trypsin inhibitor protein 1	3	3	34.8	34.8	9.8854	27.606		17728000			70532000	56324000
AT2G42600	PPC2	phosphoenolpyruvate carboxylase 2	10	7	15.9	11.7	109.75	60.239	46830000	36555000	38228000	42352000	36801000	35423000
AT2G42590	GRF9	general regulatory factor 9	7	6	32.3	28.5	29.52	20.644	38114000	44038000	37133000	31357000	28581000	36340000
AT2G41530	SFGH	S-formylglutathione hydrolase	6	6	29.2	29.2	31.655	69.496	140080000	185350000		92577000	101200000	112500000
AT2G40610	EXPA8	expansin A8	2	2	12.6	12.6	27.26	12.138	747070000	924440000	875040000	870200000	813980000	1010100000
AT2G40600		unknown	5	5	28.4	28.4	27.478	58.119	34397000	41255000	41650000	45865000	34695000	36918000
AT2G40490	HEME2	Uroporphyrinogen decarboxylase	9	9	32.7	32.7	43.579	55.113	69271000	61063000	74797000	83817000	82663000	76042000
AT2G40300	FER4	ferritin 4	4	4	24.7	24.7	29.029	9.6791		14726000	22546000			17176000
AT2G39730	RCA	rubisco activase	1	1	5.5	5.5	51.981	29.35	104680000		71175000	71080000	68364000
AT2G38870		Predicted to encode a PR (pathogenesis-related) peptide that belongs to the PR-6 proteinase inhibitor family	3	3	50	50	7.6215	84.988	121920000	95746000	103800000	152460000	165850000	185950000
AT2G38540	LTP1	lipid transfer protein 1	6	6	43.2	43.2	11.755	313.8	22690000000	32531000000	25981000000	9216000000	9029300000	9515200000
AT2G38530	LTP2	lipid transfer protein 2	5	5	46.6	46.6	11.938	150.79	1919600000	2092300000	1794700000	1499100000	1467800000	1507500000
AT2G38010	AtNCER2	neutral ceramidase 2	14	14	22.2	22.2	83.207	130.14	100950000	101470000	90381000	56806000	46590000	57931000
AT2G37720	TBL15	TRICHOME BIREFRINGENCE-LIKE 15	9	9	18.9	18.9	54.167	37.709	54960000	57176000	57710000	81284000	84051000	93240000
AT2G37660		NAD(P)-binding Rossmann-fold superfamily protein	5	4	19.1	16.9	34.879	57.861	34098000	35211000	33603000	18478000	18045000	26242000
AT2G37500		unknown	3	3	9.5	9.5	42.225	4.7506	18647000		18492000	11662000	13144000
AT2G37130		Peroxidase superfamily protein	6	6	29.1	29.1	33.272	92.059	50112000	42885000	53651000	88480000	83534000	80613000
AT2G36530	ENO2	enolase 2	14	14	43.2	43.2	47.719	323.31	223120000	214000000	218730000	163940000	165430000	165060000
AT2G36460	FBA6	fructose-bisphosphate aldolase 6	6	1	22.6	3.4	38.386	4.8073			30605000		36651000	26544000
AT2G35830		unknown	3	3	31.5	31.5	20.231	16.121	47890000	40893000	34706000	47086000	39331000	33747000
AT2G35635	UBQ7	ubiquitin 7	5	5	37	37	17.15	110.22	139560000	128450000	137980000	117720000	135760000	112580000
AT2G35410		unknown	3	3	12	12	33.785	126.52	52950000		58334000	46881000	50663000	39953000
AT2G35370	GDCH	glycine decarboxylase complex H	5	2	53.9	30.9	17.947	50.638	89062000	57638000	105370000	59044000	64576000	81589000
AT2G34930	no symbol available	disease resistance family protein / LRR family protein	36	36	49.4	49.4	100.28	323.31	798940000	884710000	831910000	895800000	867390000	857640000
AT2G34810	AtBBE16	FAD-binding Berberine family protein	16	15	30.9	29.6	61.306	86.491	122360000	151300000	131510000	114290000	120830000	127820000
AT2G34790	AtBBE-like 15	Berberine Bridge Enzyme-Like 15	26	21	57.3	49.1	59.646	323.31	838590000	842690000	823020000	524390000	499670000	530500000
AT2G34070	TBL37	TRICHOME BIREFRINGENCE-LIKE 37	7	7	24.9	24.9	43.353	105.66	162770000	157700000	154370000	262160000	243910000	236840000
AT2G33530	scpl46	serine carboxypeptidase-like 46	8	8	19.8	19.8	51.883	35.461	69520000	81522000	84092000	21420000	24323000	24605000
AT2G33330	PDLP3	plasmodesmata-located protein 3	3	3	14.1	14.1	32.658	107.37	50318000	55040000	51341000		38471000
AT2G33255		HAD-type hydrolase	2	2	9.8	9.8	27.496	5.0606			18888000		20826000
AT2G32520		alpha/beta-Hydrolases superfamily protein	3	3	17.8	17.8	24.331	8.0064	48988000	42805000	41333000	47452000	39139000	50616000
AT2G32090	GLXI-like;9	Glyoxalase I-Like;9	3	3	24.4	24.4	14.996	4.6447	41309000	42208000		33695000	34308000	35165000
AT2G31670	UP3	UP3	3	3	15.6	15.6	28.865	65.88	26399000	29936000	34071000	26665000	26684000	29331000
AT2G30200	MCAT	malonyl CoA-ACP malonyltransferase	4	4	11.9	11.9	38.98	18.736	46884000	43662000	47618000	52092000	45909000	39474000
AT2G29450	GSTU5	glutathione S-transferase tau 5	4	4	21	21	26	7.4029	19602000		15383000			15917000
AT2G28470	BGAL8	beta-galactosidase 8	24	23	41.3	41.3	92.565	323.31	2221800000	2100100000	2023500000	2487100000	2635700000	2508900000
AT2G28190	CSD2	copper/zinc superoxide dismutase 2	6	6	45.8	45.8	22.244	323.31	301900000	291940000	333970000	278360000	268490000	233890000
AT2G28100	FUC1	alpha-L-fucosidase 1	17	17	39.9	39.9	57.186	121.67	278410000	358590000	301810000	366100000	367320000	370330000
AT2G28000	CPN60A	chaperonin-60alpha	21	21	47.3	47.3	62.071	103.3	118850000	123060000	111650000	79762000	80984000	86240000
AT2G27920	SCPL51	serine carboxypeptidase-like 51	14	14	27.5	27.5	51.752	323.31	616660000	667690000	624190000	692980000	683150000	677870000
AT2G27020	PAG1	20S proteasome alpha subunit G1	4	4	21.7	21.7	27.377	47.99	46684000	68405000	53466000	52506000	49934000	44712000
AT2G26740	SEH	soluble epoxide hydrolase	7	7	27.4	27.4	36.423	73.334	31328000	27149000	32325000	38108000	37404000	39812000
AT2G26730		Leucine-rich repeat protein kinase family protein	2	2	4.9	4.9	71.751	106.7	66997000	41495000	52530000	39660000	32722000	36458000
AT2G26080	GLDP2	glycine decarboxylase P-protein 2	18	10	24.2	14.8	113.77	143.55	78482000	80109000	80809000	86590000	84334000	86368000
AT2G25060	ENODL14	early nodulin-like protein 14	3	3	13.7	13.7	19.482	32.602	74072000	75350000	80781000	74544000	67779000	73527000
AT2G24940	MAPR2	membrane-associated progesterone binding protein 2	3	3	34	34	11.031	68.375		114080000	225230000	199150000	207390000	165240000
AT2G24270	ALDH11A3	aldehyde dehydrogenase 11A3	7	7	19.2	19.2	53.06	41.457	55551000	50684000	50361000	57676000	58907000	50758000
AT2G24200	, atLAP1	leucyl aminopeptidase 1	16	10	48.5	34	54.509	323.31	138480000	142340000	139730000	156680000	163340000	147980000
AT2G23600	MES2	METHYL ESTERASE 2	6	6	27	27	31.4	61.58	67517000	76068000	61928000	67087000	71850000	42077000
AT2G22990	SCPL8	SERINE CARBOXYPEPTIDASE-LIKE 8	3	3	6.9	6.9	36.756	5.076	70763000	47629000	38239000	38267000	39507000	25107000
AT2G22980	SCPL13	serine carboxypeptidase-like 13	4	4	10.5	10.5	49.15	6.0458	42585000	53263000	35325000	61439000	64558000	53497000
AT2G22420	PRX17	Peroxidase 17	7	7	27.1	27.1	36.67	58.837	38841000	51106000	45022000	49375000	39570000	45390000
AT2G22230		Thioesterase superfamily protein	4	2	21.8	12.7	24.242	8.0446	34241000	37319000	44649000	29726000		36797000
AT2G21330	FBA1	fructose-bisphosphate aldolase 1	15	7	50.6	29.8	42.93	323.31	894110000	869980000	832070000	864800000	875790000	891660000
AT2G21170	PDTPI	PLASTID ISOFORM TRIOSE PHOSPHATE ISOMERASE	12	12	47.1	47.1	32.306	183	346650000	335080000	340310000	413190000	397710000	390350000
AT2G20890	THF1	THYLAKOID FORMATION1	4	4	16	16	33.795	16.403	55255000	53261000	48998000	33414000		44156000
AT2G20420		ATP citrate lyase (ACL) family protein	11	11	30.9	30.9	45.345	156.68	90888000	81123000	72653000	90813000	86166000	80346000
AT2G20270	GrxS12	chloroplast Grx 12	2	2	22.9	22.9	19.125	69.226			66193000		81383000	57051000
AT2G19940		unknown	10	10	34.2	34.2	42.822	100.41	37984000	39762000	40242000	53416000	51196000	47316000
AT2G19780		Leucine-rich repeat (LRR) family protein	5	4	15.9	13.4	42.843	14.597		29284000	27632000	27609000	30083000	36471000
AT2G19760	PRF1	profilin 1	4	4	42	42	14.266	48.598	130240000	158620000	153740000	105220000	89684000	99189000
AT2G18150		Peroxidase superfamily protein	4	3	18.6	14.2	37.079	21.482	122400000	115680000	123810000	101990000	66391000	86112000
AT2G15620	NIR	NITRITE REDUCTASE	13	13	25.9	25.9	65.504	29.441	47408000	45782000	46505000	39316000	42692000	40640000
AT2G15220		Plant basic secretory protein (BSP) family protein	7	7	36.9	36.9	25.164	52.431	91323000	74511000	84630000	131920000	112000000	115000000
AT2G14900	GASA7	Gibberellin-regulated family protein	4	4	31.5	31.5	11.381	23.585	876670000	1023900000	886210000	447270000	573110000	461360000
AT2G14740	VSR3	vaculolar sorting receptor 3	6	6	10.4	10.4	69.743	8.2068	9487900	10926000	7526500	7938000	6749700	8756100
AT2G14610	PR1	pathogenesis-related gene 1	2	2	12.4	12.4	17.677	4.7498	262650000	233660000	239490000	177390000	148390000	230800000
AT2G14170	ALDH6B2	aldehyde dehydrogenase 6B2	4	4	13.9	13.9	53.406	5.2074	15454000	19206000	15721000	15915000		19319000
AT2G13360	AGT1	alanine:glyoxylate aminotransferase	15	15	61.3	61.3	44.207	239.63	319150000	278630000	319310000	427940000	407910000	437180000
AT2G10940		lipid-transfer protein	5	5	19.9	19.9	29.648	79.822	3918900000	3239500000	3436900000	432720000	464050000	345520000
AT2G06850	XTH4	xyloglucan endotransglucosylase/hydrolase 4	15	13	51.4	45.6	34.291	127.07	560830000	602060000	544720000	233430000	212650000	200920000
AT2G06050	OPR3	oxophytodienoate-reductase 3	4	4	11	11	42.691	4.8102			23259000		20395000
AT2G05990	ENR1	ENOYL-ACP REDUCTASE 1	7	7	21.8	21.8	41.213	33.018	60090000	87529000	81813000	65338000	61549000	67401000
AT2G05920	SBT1.8	subtilase 1.8	21	20	38.1	38.1	80.014	323.31	364140000	347910000	338000000	247760000	240920000	260670000
AT2G05840	PAA2	20S proteasome subunit PAA2	7	2	30.9	12.2	27.35	4.7368			13325000	14583000
AT2G05790		O-Glycosyl hydrolases family 17 protein	4	4	9.5	9.5	51.306	7.2587	51943000	42914000	45123000	34438000	31038000	26137000
AT2G05710	ACO3	aconitase 3	10	5	14.2	8.4	108.2	27.877	21391000	23965000		37714000	34313000	32771000
AT2G04780	FLA7	FASCICLIN-like arabinoogalactan 7	3	3	13.4	13.4	26.845	54.996	377390000	433830000	343830000	470400000	386130000	450120000
AT2G04690		Pyridoxamine 5-phosphate oxidase family protein	9	6	50.2	36.9	22.821	161.15	1284700000	1367600000	1377100000	1632400000	1679400000	1746000000
AT2G04030	EMB1956	EMBRYO DEFECTIVE 1956	5	5	8.6	8.6	88.255	15.596		22777000	25645000			19717000
AT2G03980		GDSL-motif lipase	5	5	19.9	19.9	40.757	61.63	148050000	128340000	147980000	171500000	177560000	174520000
AT2G02990	RNS1	ribonuclease 1	10	10	62.2	62.2	25.396	323.31	224230000	223260000	204830000	107730000	103550000	105490000
AT2G02850	ARPN	plantacyanin	2	2	17.1	17.1	14.038	49.688		286310000	254750000	345760000		503120000
AT2G01820	TMK3	Transmembrane kinase 3	8	8	10.9	10.9	101.96	227.44	73520000	72441000	64015000	97595000	87493000	99206000
AT2G01140	FBA3	fructose-bisphosphate aldolase 3	9	7	30.9	26.6	42.327	25.804	30958000	43336000	38303000		29815000	31418000
AT1G80600	TUP5	TUMOR PRONE 5	12	12	32.4	32.4	48.826	128.46	58089000	56562000	56961000	70858000	64969000	61483000
AT1G80560	IMD2	isopropylmalate dehydrogenase 2	6	3	21	12.6	43.37	18.344	12239000	11696000		12783000		10141000
AT1G80380	GLYK	glycerate kinase	5	5	17.6	17.6	40.819	43.347	38270000	29429000	29367000	28763000	37447000	38355000
AT1G79720		Eukaryotic aspartyl protease family protein	10	10	26.7	26.7	52.395	212.05	353570000	379260000	379860000	475350000	464740000	466330000
AT1G79550	PGK3	phosphoglycerate kinase 3	17	14	56.6	46.6	42.131	238.18	153240000	158200000	151880000	171440000	177200000	167730000
AT1G79440	ALDH5F1	aldehyde dehydrogenase 5F1	5	5	13.4	13.4	56.558	14.23	26293000		23939000			21030000
AT1G79210		N-terminal nucleophile aminohydrolases (Ntn hydrolases) superfamily protein	4	4	22.1	22.1	25.733	10.98	49503000	49671000	49652000		45817000	40321000
AT1G78850	MBL1	Mannose Binding Lectin1	25	14	67.6	42	49.051	323.31	2835900000	2905400000	2881100000	2494900000	2411800000	2482400000
AT1G78830	MNB1		20	12	57.1	37.6	50.342	323.31	7735900000	8420600000	8026100000	8580900000	8181300000	9111600000
AT1G78820		unknown	16	8	42.6	23.1	50.594	121.74	217640000	249880000	211590000	200760000	198150000	211800000
AT1G78680	GGH2	gamma-glutamyl hydrolase 2	6	6	26.1	26.1	36.957	85.55	53214000	80697000	57712000	67383000	60323000	71798000
AT1G78460	cHBP3	cytosolic heme (tetrapyrrole) binding protein 3	5	5	21.5	21.5	24.25	11.99	16939000	17316000	15967000	23298000	18175000	26120000
AT1G78380	GSTU19	glutathione S-transferase TAU 19	10	9	44.3	44.3	25.65	31.503	331880000	326380000	300320000	331470000	332910000	311610000
AT1G78370	GSTU20	glutathione S-transferase TAU 20	3	2	14.3	11.1	25.006	5.6089	24823000		23950000	26341000	24368000	35097000
AT1G78300	GRF2	general regulatory factor 2, 14-3-3 PROTEIN G-BOX FACTOR14 OMEGA	9	5	42.9	25.9	29.161	63.851	48837000	55025000	55229000	36686000	54912000	42895000
AT1G78060		Glycosyl hydrolase family protein	30	30	48.9	48.9	83.891	323.31	791930000	854060000	845480000	1207800000	1237800000	1282400000
AT1G77510	PDI6	PROTEIN DISULFIDE ISOMERASE 6	5	4	15	12.4	56.364	10.665		7804100	14337000	16120000	16578000	11668000
AT1G77490	TAPX	thylakoidal ascorbate peroxidase	5	5	15.7	15.7	45.643	29.621	46849000	46314000	40679000	63209000	64488000	63614000
AT1G76680	OPR1	12-oxophytodienoate reductase 1	2	2	6.7	6.7	41.167	4.742	11571000		7446700	9495300	6316900	6348400
AT1G76180	ERD14	EARLY RESPONSE TO DEHYDRATION 14	9	8	50.8	46.5	20.786	115.41	231720000	271870000	239030000	99435000	109570000	97820000
AT1G76160	sks5	SKU5 similar 5	19	12	46.4	34	60.04	323.31	6332900000	6875500000	6373600000	9589900000	9902500000	9962100000
AT1G76140	POQR-like	POQR-LIKE Putative prolyl oligopeptidase	3	3	5.4	5.4	89.062	7.3168			20414000			16377000
AT1G76080	CDSP32	chloroplastic drought-induced stress protein of 32 kD	7	7	27.2	27.2	33.684	50.144	70324000	72197000	71447000	54367000	62312000	58925000
AT1G75330	OTC	ornithine carbamoyltransferase	3	3	8	8	41.002	6.2129		33923000	38131000			65720000
AT1G75040	PR5	pathogenesis-related gene 5	13	13	69.9	69.9	25.252	323.31	13281000000	15750000000	13755000000	17115000000	16625000000	17493000000
AT1G74920	ALDH10A8	aldehyde dehydrogenase 10A8	9	9	35.9	35.9	54.431	94.278	31606000	31578000	33603000	38833000	34408000	33190000
AT1G74210	GDPD5	glycerophosphodiester phosphodiesterase 5	8	7	28.1	25.8	45.021	128.79	136130000	123950000	154510000	198550000	181470000	156050000
AT1G73260	ATKTI1	kunitz trypsin inhibitor 1	3	3	18.6	18.6	23.793	32.165	31432000	30021000	28346000	34587000	28565000	33413000
AT1G72990	BGAL17	beta-galactosidase 17	3	3	5.1	5.1	72.621	10.274		23198000	18307000	32824000	31360000	26553000
AT1G72610	GER1	germin-like protein 1	4	4	11.5	11.5	21.559	17.505	1817800000	2422300000	2008500000	988080000	1006600000	1071500000
AT1G72230		Cupredoxin superfamily protein	4	4	43.1	43.1	18.371	70.616	33118000	33720000		53126000	50514000	50162000
AT1G72150	PATL1	PATELLIN 1	15	15	25.3	25.3	64.046	92.2	196800000	241500000	223050000	134140000	144520000	128000000
AT1G71950	SPI-1	Subtilisin Propeptide-Like Inhibitor 1	3	3	28.7	28.7	14.852	11.09	32570000		31832000	35222000	35857000	31070000
AT1G70890	MLP43	major latex protein like 43	9	8	61.4	55.1	17.889	154.77	322230000	340950000	289210000	287580000	286430000	257240000
AT1G70730	PGM2	phosphoglucomutase 2	16	10	38.5	26.8	63.481	71.67	49837000	47351000	45398000	62024000	66280000	60896000
AT1G69740	ALAD1	5-aminolevulinic acid dehydratase 1	3	3	10	10	46.69	11.775	22269000	18166000	21006000	21112000	21921000
AT1G68560	TRG1	thermoinhibition resistant germination 1	27	26	39.1	38.4	102.4	320.33	680940000	705660000	658460000	433450000	441940000	439280000
AT1G68290	ENDO2	endonuclease 2	5	5	24.8	24.8	32.745	56.316	32173000		21190000	31955000	29364000	32285000
AT1G68010	HPR	hydroxypyruvate reductase	17	17	53.1	53.1	42.247	282.64	524390000	547790000	520370000	564070000	565280000	625740000
AT1G67830	FXG1	alpha-fucosidase 1	9	9	34.7	34.7	40.461	54.455	53544000	58519000	64011000	42996000	47743000	43098000
AT1G67280	AtGLYI6	GlyoxalaseI 6	7	6	26.6	22	39.167	33.101	75000000	69901000	57967000	104970000	93047000	80328000
AT1G67090	RBCS1A	ribulose bisphosphate carboxylase small chain 1A	11	8	56.1	35	20.216	323.31	4164300000	3894200000	4189400000	5148500000	5020400000	4922700000
AT1G66970	GDPDL1	Glycerophosphodiester phosphodiesterase (GDPD) like 1	11	10	25.3	23.6	62.234	194.93	77081000	73051000	69532000	99237000	97263000	89526000
AT1G66250		O-Glycosyl hydrolases family 17 protein	2	2	4.6	4.6	54.206	6.1557		32117000	41792000	42508000		35363000
AT1G65960	GAD2	glutamate decarboxylase 2	3	2	11.7	5.3	56.14	10.967	47485000	61477000	53114000	53618000	62655000	47732000
AT1G65930	cICDH	cytosolic NADP+-dependent isocitrate dehydrogenase	14	12	32.9	28.5	45.746	296.38	181010000	172490000	180360000	197750000	189000000	170320000
AT1G65900		unknown	5	5	16.5	16.5	40.245	14.249	62758000	61218000	53875000	36776000	45508000	49286000
AT1G65590	HEXO3	beta-hexosaminidase 3	14	13	31.2	29.7	60.013	74.283	241350000	256590000	233290000	128180000	144830000	145350000
AT1G63940	MDAR6	monodehydroascorbate reductase 6	16	15	44	42.3	52.115	94.116	72829000	71167000	74768000	85144000	84059000	81200000
AT1G63770		Peptidase M1 family protein	21	21	28.2	28.2	99.157	323.31	67926000	62488000	73378000	69650000	82891000	75960000
AT1G62750	SCO1	SNOWY COTYLEDON 1	7	7	14.2	14.2	86.057	300.03	51682000	38623000	43335000	47545000	45714000	40724000
AT1G62660	VI1	VACUOLAR INVERTASE 1	7	6	12.8	11.1	72.227	94.058	56654000	62536000	56023000	55270000	47490000	56149000
AT1G62480		unknown	10	10	83.6	83.6	16.628	323.31	1649600000	1673000000	1666900000	1259700000	1337600000	1227400000
AT1G61820	BGLU46	beta glucosidase 46	5	5	10.9	10.9	59.112	15.246	27843000	28516000	29284000	38519000	34528000	37063000
AT1G59900	AT-E1 ALPHA	pyruvate dehydrogenase complex E1 alpha subunit	3	3	9	9	41.895	44.292	23644000		24058000	25766000	24747000	29934000
AT1G58370	ATXYN1	ARABIDOPSIS THALIANA XYLANASE 1	7	7	10	10	102.46	25.222	135080000	183150000	152130000	187390000	165740000	199730000
AT1G57720		Translation elongation factor EF1B, gamma chain	2	1	7	4.8	46.4	8.1786	33343000	34832000		22409000	18173000	20356000
AT1G57590		Pectin Acetyesterase 2	5	5	14	14	49.914	32.634	36580000	34410000	27652000		26128000
AT1G56070	LOS1	LOW EXPRESSION OF OSMOTICALLY RESPONSIVE GENES 1	9	9	15.4	15.4	93.89	112.88	34490000	42050000	42605000	32997000	31953000	27066000
AT1G55490	CPN60B	chaperonin-60beta1	16	2	33.8	4.2	63.808	150.65	134930000	124240000	126880000	86578000	79022000	81579000
AT1G55480	ZKT, MET1	protein containing PDZ domain, a K-box domain, and a TPR region	3	3	9	9	37.41	74.655		42239000	43796000	49377000	48790000	36149000
AT1G55260	LTPG6	glycosylphosphatidylinositol-anchored lipid protein transfer 6	5	5	25.4	25.4	25.034	178.25	281580000	262230000	255480000	270750000	238870000	223390000
AT1G55120	FRUCT5	beta-fructofuranosidase 5, 6-fructan exohydrolase	6	6	14.6	14.6	62.388	55.73	32916000	24668000	30526000	33406000	26188000	34672000
AT1G54790		GDSL-motif lipase	6	6	14.7	14.7	42.408	113.79	370560000	353240000	331180000	374670000	429860000	375040000
AT1G53920	GLIP5	GDSL-motif lipase 5	3	3	6.5	6.5	43.457	7.6582	18541000	20706000	17291000	10740000	11323000	11895000
AT1G53580	GLX2-3	GLYOXALASE 2-3	3	3	15.6	15.6	32.358	4.2476	19693000			23428000
AT1G53310	PPC1	PEP(PHOSPHOENOLPYRUVATE) CARBOXYLASE 1	6	3	8.9	4.8	110.28	10.927	17225000				10965000
AT1G53240	mMDH1	mitochondrial malate dehydrogenase 1	8	6	32	28.4	35.804	160.31	259860000	224790000	270000000	289220000	302160000	285170000
AT1G53070		Legume lectin family protein	8	8	37.5	37.5	30.378	71.51	1321300000	1062800000	1316800000	1461800000	1602400000	1544400000
AT1G51805	SIF3	stress induced factor 3	6	5	9.8	8.9	98.075	90.203	60119000	57262000	72802000	101010000	98960000	94755000
AT1G51630	MSR2	Mannan Synthesis Related 2	4	4	9.9	9.9	47.142	13.576			57396000	45984000	54886000	49195000
AT1G50480	THFS	10-formyltetrahydrofolate synthetase	6	6	15.1	15.1	67.801	66.299	23015000	20454000	20717000	21059000	26786000	27680000
AT1G50320	THX	thioredoxin X	3	3	20.3	20.3	19.648	17.63	14710000	10320000	9134700	25382000	23383000	19988000
AT1G49750		Leucine-rich repeat (LRR) family protein	13	13	26.3	26.3	54.407	187.09	1548700000	1786300000	1616300000	1066000000	1108100000	1036900000
AT1G49740		unknown	13	13	42.6	42.6	39.825	323.31	415100000	383740000	383430000	349690000	350690000	351750000
AT1G48030	mtLPD1	mitochondrial lipoamide dehydrogenase 1	20	10	49.9	30.4	53.987	323.31	243490000	213200000	215440000	244250000	252430000	254210000
AT1G47960	C/VIF1	cell wall / vacuolar inhibitor of fructosidase 1	5	5	39.8	39.8	18.033	168.85	519540000	479740000	585090000	726360000	794830000	691910000
AT1G47128	RD21A	responsive to dehydration 21A	7	7	17.3	17.3	50.966	107.52	287030000	256640000	294520000	297620000	315930000	274190000
AT1G45145	TRX-h5	thioredoxin H-type 5	3	3	36.4	36.4	13.122	212.88	87097000	78268000	78185000	83983000	88227000	103340000
AT1G45130	BGAL5	beta-galactosidase 5	12	9	23.2	19.8	81.443	29.032	44129000	55214000	48758000	45249000	44184000	50645000
AT1G43670	FBP	fructose-1,6-bisphosphatase	10	10	33.7	33.7	37.287	96.323	49706000	55215000	49706000	53958000	60800000	54688000
AT1G41830	SKS6	SKU5 SIMILAR 6	19	15	45.2	36.3	60.577	284.12	1339900000	1540400000	1391300000	1560500000	1532600000	1701400000
AT1G35720	ANNAT1	annexin 1	16	16	61.8	61.8	36.203	210.48	199610000	210790000	200980000	183840000	173360000	187280000
AT1G35160	GRF4	GENERAL REGULATORY FACTOR 4	9	2	35.6	12	30.194	15.342	51775000	36877000	30946000	30519000	27599000
AT1G33610		Leucine-rich repeat (LRR) family protein	14	14	33.9	33.9	52.666	323.31	387820000	388400000	367520000	500030000	457200000	475570000
AT1G33600		Leucine-rich repeat (LRR) family protein	19	18	43.7	39.3	52.47	323.31	2807700000	3025700000	2802200000	2706300000	2887300000	3035800000
AT1G33590		Leucine-rich repeat (LRR) family protein	25	24	68.8	68.8	51.741	323.31	9458400000	9504900000	9632300000	13579000000	13629000000	14083000000
AT1G32990	PRPL11	plastid ribosomal protein l11	2	2	13.1	13.1	23.148	4.9744	32894000	20073000	43859000	33191000		30683000
AT1G32470	GDC-H1		5	2	53.6	30.7	17.897	323.31	545990000	496900000	562080000	484960000	543710000	648460000
AT1G32060	PRK	phosphoribulokinase	14	14	52.4	52.4	44.463	248.16	233820000	194850000	228580000	123110000	124200000	131240000
AT1G31740	BGAL15	beta-galactosidase 15	1	1	1.4	1.4	86.341	7.5747	104540000		116990000	124440000
AT1G31690	CuAOalpha2	COPPER AMINE OXIDASE ALPHA 2	25	25	38.6	38.6	76.673	323.31	1617300000	1576200000	1688500000	1254100000	1221000000	1223900000
AT1G30720	AtBBE10	FAD-binding Berberine family protein	18	17	37	35.7	58.878	176.38	288520000	253810000	262770000	353740000	348080000	338170000
AT1G30600		unknown	7	6	10.6	8.5	88.544	25.5	29968000	33886000	33281000	39557000	37346000	37505000
AT1G29670	GGL6	GDSL-motif lipase	16	16	56.7	56.7	39.871	323.31	6120300000	6395300000	6643300000	4249700000	4108000000	4482100000
AT1G29660	GGL5	GDSL-motif lipase	13	13	46.4	46.4	40.141	323.31	6631700000	6280500000	6773600000	8277800000	8261200000	8289100000
AT1G29050	TBL38	TRICHOME BIREFRINGENCE-LIKE 38	8	8	23.9	23.9	42.708	37.726	64703000	75259000	71912000	103140000	104940000	108210000
AT1G28670	ARAB-1	GDSL lipase	2	2	6	6	42.427	11.967	29530000	31924000		30614000	26088000	28833000
AT1G28600	GGL2	Guard-cell-enriched GDSL Lipase 2	9	9	31.8	31.8	43.61	323.31	427120000	373450000	382770000	434900000	415540000	427030000
AT1G27950	LTPG1	glycosylphosphatidylinositol-anchored lipid protein transfer 1	6	6	21.2	21.2	19.759	38.632	415980000	329320000	383890000	368100000	340820000	275090000
AT1G26560	BGLU40	beta glucosidase 40	9	9	24.1	24.1	58.125	52.424	153890000	150800000	147960000	148690000	107600000	109500000
AT1G26420	AtBBE7	FAD-binding Berberine family protein	7	4	13.4	7.4	59.217	23.604	38541000	47472000	38687000	57076000	61371000	51986000
AT1G26390	AtBBE4	FAD-binding Berberine family protein	5	2	12.1	5.5	58.947	26.461	29634000	39685000	30027000		27670000	35987000
AT1G25230		Calcineurin-like metallo-phosphoesterase superfamily protein	2	2	9.6	9.6	30.903	35.192	45524000			40872000
AT1G23820	SPDS1	spermidine synthase 1	4	2	15.3	7.5	36.553	25.061	27935000	31379000	34174000	29655000	28610000	29973000
AT1G23740	AOR	alkenal/one oxidoreductase	12	12	41.7	41.7	40.986	101.31	153580000	169170000	170570000	158400000	163150000	174490000
AT1G23310	GGT1	GLUTAMATE:GLYOXYLATE AMINOTRANSFERASE 1	23	23	55.7	55.7	53.301	323.31	255890000	261840000	273080000	291680000	289400000	307230000
AT1G23205		unknown	3	3	12.7	12.7	22.676	18.052	48241000	70943000	60061000	63161000	67690000	58376000
AT1G23190	PGM3	phosphoglucomutase 3	17	11	39.1	27.4	63.17	91.804	2624900000	2772900000	2596600000	3029500000	2981200000	2782800000
AT1G22840	ATCYTC-A, CYTC-1	CYTOCHROME C-A, CYTOCHROME C-1	3	2	30.7	23.7	12.394	67.401	49923000	71380000	47061000	56474000	60168000	70120000
AT1G22530	PATL2	PATELLIN 2	15	15	24.6	24.6	76.007	144.7	84845000	94930000	82780000	56661000	61558000	49464000
AT1G22300	GRF10	general regulatory factor 10, 14-3-3 PROTEIN G-BOX FACTOR14 EPSILON	6	5	25.2	21.3	28.9	139.31	141020000	167380000	144050000	130470000	134840000	129120000
AT1G21880	LYM1	LysM-containing receptor protein 2	3	2	9.9	7	43.489	21.745	102810000	99171000	88664000	90423000	93129000	92221000
AT1G21750	PDI5	PDI-like 1-1, ARABIDOPSIS THALIANA PROTEIN DISULFIDE ISOMERASE 5, PROTEIN DISULFIDE ISOMERASE 5	6	5	13.3	10.7	54.158	27.067	30194000	39394000	30224000	31964000	40487000	38492000
AT1G21680		DPP6 N-terminal domain-like protein	16	13	27.5	24.1	78.441	73.462	41736000	53064000	43012000	61022000	66793000	60589000
AT1G21670		DPP6 amino-terminal domain protein	38	35	62	58.6	77.288	323.31	3242300000	3460800000	3350700000	4749700000	4799200000	4984200000
AT1G21350		Thioredoxin superfamily protein	5	5	31.1	31.1	24.822	44.097	51256000	42973000	51437000	84909000	71671000	74160000
AT1G20850	XCP2	xylem cysteine peptidase 2	3	2	11.8	8.1	39.707	58.297	65943000	77074000	92877000	58890000	62670000	69510000
AT1G20620	CAT3	catalase 3	17	13	46.6	34.6	55.967	323.31	771080000	722570000	710910000	949960000	965170000	945830000
AT1G20450	LTI45	LOW TEMPERATURE INDUCED 45	4	4	23.6	23.6	29.443	70.595	68822000	85245000	80235000	38197000	40436000	45121000
AT1G20440	COR47	cold-regulated 47	11	10	43.8	40.8	29.896	323.31	425290000	478990000	458270000	235070000	222950000	215050000
AT1G20340	DRT112	DNA-DAMAGE-REPAIR/TOLERATION PROTEIN 112	2	2	38.9	38.9	16.984	56.187	6272400000		6617200000		7608200000	8837700000
AT1G20190	EXPA11	expansin 11	4	4	25.4	25.4	21.011	101.97	214210000	267030000	241780000	122300000	118820000	168650000
AT1G20160	CRSP	CO2 RESPONSE SECRETED PROTEASE	14	14	26.7	26.7	81.479	323.31	601150000	667990000	661060000	521560000	524570000	524790000
AT1G20020	LFNR2	leaf-type chloroplast-targeted FNR 2	12	11	40.1	37.1	41.168	245.92	410110000	411810000	432490000	585320000	627410000	610110000
AT1G19570	DHAR5	DEHYDROASCORBATE REDUCTASE 5	13	13	69	69	23.641	308.01	801010000	730630000	700680000	930490000	905670000	842770000
AT1G19320		Pathogenesis-related thaumatin superfamily protein	6	6	37.7	37.7	25.43	82.383	104490000	121910000	102240000	148150000	141550000	143770000
AT1G19130		unknown	4	4	34.9	34.9	21.64	34.737	18876000	28111000	24254000	24549000		23915000
AT1G18210		Calcium-binding EF-hand family protein	3	3	20	20	18.35	8.7224	32077000	29323000	36411000	31436000	34394000	31690000
AT1G18080	SAC53	Suppressor of Acaulis 53	6	6	28.7	28.7	35.747	23.096	63010000		54857000	63634000
AT1G17860	AtKTI5	ARABIDOPSIS THALIANA KUNITZ TRYPSIN INHIBITOR 5	11	11	65.3	65.3	22.081	322.53	1500300000	1602600000	1525900000	2238300000	2063100000	1931500000
AT1G17820		testis-expressed sequence 2-like protein (DUF2404)	1	1	1.2	1.2	90.11	2.045	133640000	107100000		195930000	150440000	183410000
AT1G17650	GLYR2	glyoxylate reductase 2	3	3	18.7	18.7	31.282	11.761	15826000	16325000	14412000	18966000	17913000	16192000
AT1G17290	AlaAT1	alanine aminotransferase	9	9	24.9	24.9	59.82	71.92	458130000	455170000	505780000	497910000	538260000	444690000
AT1G16080		unknown	12	12	43.5	43.5	34.13	107.41	120780000	109280000	95769000	127610000	116200000	117930000
AT1G15340	MBD10	methyl-CPG-binding domain 10	4	4	15.7	15.7	36.502	10.861	22900000	39030000	32115000	31803000	25999000	25152000
AT1G15000	scpl50	serine carboxypeptidase-like 50	3	3	7.7	7.7	49.222	31.866	57823000	46345000	47281000	76983000	93245000	79843000
AT1G14540	PER4	peroxidase 4	4	4	16.8	16.8	34.411	34.863	36068000	31936000	34112000	27388000	30025000	30137000
AT1G14210		unknown	8	8	34	34	28.186	25.349	98126000	103650000	87483000	95679000	97495000	91932000
AT1G13930		unknown	3	3	21.9	21.9	16.163	14.794	64821000	49868000	43890000	29618000	30890000	36343000
AT1G13900	PAP2	purple acid phosphatase 2	14	14	21.6	21.6	73.716	83.258	134660000	143740000	128200000	98560000	110770000	96432000
AT1G13750	PAP1	PURPLE ACID PHOSPHATASE 1	8	8	15.2	15.2	68.241	88.144	83187000	108880000	98282000	108770000	103180000	107480000
AT1G13440	GAPC2	glyceraldehyde-3-phosphate dehydrogenase C2	12	2	45.6	8	36.913	5.6091			22375000		19067000	23558000
AT1G13270	MAP1B	methionine aminopeptidase 1B	4	4	16.5	16.5	40.424	8.2165			19440000			22761000
AT1G12900	GAPA-2	glyceraldehyde 3-phosphate dehydrogenase A subunit 2	2	1	9.8	5	34.332	36.684			14206000	13418000		14377000
AT1G12310		Calcium-binding EF-hand family protein	4	2	33.1	18.9	16.517	110.9	49606000	52119000	53198000	27684000	32551000	33663000
AT1G12240	VIN2	vacuolar invertase 2	11	10	20.9	19.3	73.843	139.07	73987000	61916000	64126000	72302000	75152000	73441000
AT1G12080		unkown	7	7	64.5	64.5	15.382	323.31	618350000	601820000	632800000	446900000	416610000	427380000
AT1G11930		unknown	4	4	26.3	26.3	27.766	12.668	21356000	18526000		23180000	17908000
AT1G11860	GLDT	T-protein is the aminomethyltransferase of the glycine cleavage multienzyme system GCS	13	13	41.2	41.2	44.444	323.31	616590000	480250000	549910000	615850000	633380000	651700000
AT1G11840	GLYI3	glyoxalaseI 3, glyoxalase I homolog	11	10	40.3	34.6	31.928	224.66	181210000	197340000	164260000	158370000	160340000	162890000
AT1G11820		O-Glycosyl hydrolases family 17 protein	4	4	22.9	22.9	42.348	38.85	30780000		37489000			59536000
AT1G11190	BFN1	bifunctional nuclease i	3	3	14.8	14.8	34.884	10.138			9138700		12254000
AT1G11080	scpl31	serine carboxypeptidase-like 31	4	3	11.1	7.5	55.839	3.9619	45779000	39525000			27938000	31853000
AT1G09880		Rhamnogalacturonate lyase family protein	2	2	5.2	5.2	72.388	6.3179			17981000		18829000
AT1G09750		Eukaryotic aspartyl protease family protein	14	14	33	33	47.661	323.31	7518100000	7341100000	7418700000	10622000000	10645000000	11647000000
AT1G09640		unknown	2	1	4.8	2.7	46.66	6.2529	31404000	37696000			27660000
AT1G09560	GLP5	germin-like protein 5	4	2	22.4	11.9	22.868	77.758	154680000	121360000	139170000	91408000	77044000
AT1G09390		GDSL-motif lipase	3	3	9.2	9.2	40.476	25.687	37233000	46129000	39870000	43461000		47678000
AT1G09340	CRB	chloroplast RNA binding	19	19	55.3	55.3	42.619	309.91	579240000	561870000	540740000	607170000	613040000	553710000
AT1G09310	SVBL	SVB-like	7	7	39.7	39.7	19.947	72.553	282500000	280750000	222940000	127200000	144140000	140680000
AT1G09210	CRT1b	calreticulin 1b	7	3	21.2	11.6	48.156	16.325	32776000	52608000	39564000	34807000	37963000	32487000
AT1G09010		glycoside hydrolase family 2 protein	6	6	13.8	13.8	107.66	15.579	34591000	22619000	27684000	29882000	36857000	32395000
AT1G08980	ATAMI1, AMI1, TOC64-I, ATTOC64-I	amidase 1	4	4	15.1	15.1	45.056	19.291	16185000		14814000		17991000	20511000
AT1G08830	SOD1	superoxide dismutase 1	5	4	55.3	46.7	15.098	255.91	550420000	569920000	499470000	522950000	482200000	533780000
AT1G08110	GLYI2	Glyoxalase12	7	7	56.8	56.8	20.848	83.664	99534000	97139000	97608000	110840000	108910000	97262000
AT1G07890	MEE6	maternal effect embryo arrest 6	4	4	16.9	16.9	27.52	23.375	44198000	50178000	50531000	32183000	32108000	21851000
AT1G07370	PCNA1	proliferating cellular nuclear antigen 1	3	3	14.4	14.4	29.122	11.797	29334000		33186000	31852000	35557000	29619000
AT1G06680	PSII-P	OXYGEN-EVOLVING ENHANCER PROTEIN 2, PHOTOSYSTEM II SUBUNIT P	8	8	38	38	28.095	174.96	427170000	479880000	473040000	317950000	342840000	402790000
AT1G06290	ACX3	acyl-CoA oxidase 3	3	3	6.1	6.1	75.675	22.06		10153000	12717000		13938000
AT1G06130	GLX2-4	glyoxalase 2-4	2	2	7.6	7.6	36.496	9.4538	23126000		23111000	26875000	27197000	23831000
AT1G05310		Pectin lyase-like superfamily protein	6	6	24.9	24.9	43.349	103.79	278630000	256410000	303610000	296100000	339960000	253480000
AT1G05260	PER3	PEROXIDASE 3	12	11	55.2	52.5	34.905	323.31	349620000	340520000	395700000	328550000	305250000	348010000
AT1G04420		NAD(P)-linked oxidoreductase superfamily protein	7	7	22.6	22.6	46.427	17.531	40194000	47743000	45160000	61495000	56913000	47894000
AT1G04410	c-NAD-MDH1	cytosolic-NAD-dependent malate dehydrogenase 1	11	11	35.2	35.2	35.571	293.12	257780000	217600000	261380000	223500000	227890000	243950000
AT1G03870	FLA9	FASCICLIN-like arabinoogalactan 9	5	4	20.6	17	26.115	135.63	113520000	124040000	113520000	140470000	115440000	118320000
AT1G03680	TRX-M1	thioredoxin M-type 1	6	6	36.3	36.3	19.664	193.11	339600000	354600000	349430000	565620000	564570000	553070000
AT1G03475	LIN2	LESION INITIATION 2	7	7	19.9	19.9	43.796	33.912	55061000	60282000	55713000	50896000	53519000	52333000
AT1G03230	SAP1	secreted aspartic protease 1	14	7	37.1	21.9	46.148	179.66	120070000	107490000	127160000	61848000	61177000	62036000
AT1G03220	SAP2	secreted aspartic protease 2	20	13	55.2	40	45.717	323.31	3769500000	3465900000	3687700000	3907900000	3998100000	3925600000
AT1G02360		Chitinase family protein	9	9	47.4	47.4	30.137	290.29	836040000	912700000	698210000	915310000	942560000	939880000
AT1G02335	PDGLP2	PLASMODESMAL GERMIN-LIKE PROTEIN 2	6	4	33.8	23.3	23.441	317.06	1081300000	1308300000	1300700000	1045200000	1092100000	1232300000
AT1G01090	PDH-E1 ALPHA	pyruvate dehydrogenase E1 alpha	3	3	9.6	9.6	47.173	7.6594	23538000	19614000	22180000	22204000	21780000	17247000
