# Supplementary material for: Analysis of the apoplast fluid proteome during the induction of systemic acquired resistance in Arabidopsis thaliana
Source: PeerJ. 2023 Oct 20;11:e16324. doi: 10.7717/peerj.16324 (PMC10592298; doi:10.7717/peerj.16324)
Supplement: Supplemental Information 4 [file peerj-11-16324-s004.xlsx]

## Sheet: BP
GOIDs	Ontology	Description	Counts	pvalue	p.adjust	IDs
GO:0009735	BP	response to cytokinin	34	4.84326e-19	3.43871e-17	AT5G20630/AT1G78830/AT3G15360/AT1G20020/AT5G42980/AT4G33680/AT3G49120/AT3G54050/AT3G04790/AT1G04410/AT3G63140/AT4G38740/AT3G14420/AT4G25130/AT3G55440/AT1G56070/AT2G43750/AT2G40490/AT3G16640/AT5G35630/AT1G03475/AT5G42020/AT1G13930/AT1G21750/AT1G07890/AT1G32060/AT4G39330/AT1G50480/AT1G78370/AT4G08390/AT3G48990/AT2G36460/AT3G27850/AT3G47520
GO:0009409	BP	response to cold	43	6.97529e-19	4.12704e-17	AT5G20630/AT1G03680/AT3G01500/AT3G12780/AT1G67280/AT1G09340/AT3G57260/AT1G20620/AT4G35090/AT1G67090/AT3G54050/AT1G05260/AT3G16470/AT5G51820/AT3G11630/AT5G57560/AT3G14210/AT1G53240/AT1G63940/AT4G37930/AT1G23740/AT1G35720/AT3G16460/AT5G54770/AT1G56070/AT5G61410/AT5G06290/AT4G02520/AT2G36530/AT5G02500/AT2G27020/AT1G55490/AT1G09560/AT1G32060/AT1G20450/AT5G38480/AT1G20440/AT5G04590/AT1G76180/AT4G24770…
GO:0009651	BP	response to salt stress	52	5.79639e-18	2.9396e-16	AT3G46550/AT5G14200/AT5G26000/AT2G05710/AT4G34180/AT5G17920/AT1G08830/AT5G09650/AT4G19810/AT3G16470/AT5G43060/AT1G04410/AT1G53240/AT1G65930/AT3G03250/AT4G37530/AT5G20010/AT3G04120/AT4G35830/AT1G03220/AT3G03780/AT1G35720/AT3G10920/AT3G23940/AT4G25130/AT3G02230/AT3G55440/AT3G52930/AT4G02520/AT2G36530/AT5G25980/AT5G17310/AT5G35630/AT3G60750/AT5G07440/AT1G13930/AT1G21750/AT5G39730/AT1G09210/AT1G07890…
GO:0019253	BP	reductive pentose-phosphate cycle	14	9.74035e-18	4.16805e-16	ATCG00490/AT3G12780/AT5G38430/AT1G67090/AT3G54050/AT3G04790/AT2G21170/AT5G38420/AT2G47400/AT3G55800/AT3G62410/AT3G60750/AT1G32060/AT1G12900
GO:0005975	BP	carbohydrate metabolic process	49	1.11746e-15	2.58413e-14	AT5G41870/AT5G26000/AT5G58480/AT5G63800/AT4G25000/AT3G13750/AT5G56870/AT4G26140/AT3G57240/AT4G31140/AT3G52840/AT3G57260/AT1G61820/AT5G58090/AT4G34480/AT5G08370/AT2G28100/AT4G19810/AT3G19620/AT2G28470/AT5G08380/AT5G51820/AT5G11720/AT1G04410/AT1G53240/AT4G25900/AT1G23190/AT1G26560/AT3G55260/AT5G25980/AT5G63810/AT2G05790/AT5G58330/AT1G45130/AT3G12700/AT1G09010/AT3G56310/AT1G65590/AT5G13420/AT4G23820…
GO:0006979	BP	response to oxidative stress	40	1.59515e-15	3.27892e-14	AT5G19890/AT5G05340/AT2G37130/AT2G05710/AT4G33420/AT3G49120/AT4G20830/AT1G08830/AT5G59880/AT1G20620/AT5G20230/AT5G06720/AT4G35090/AT1G78380/AT4G11290/AT1G05260/AT2G28190/AT4G37530/AT3G04120/AT4G25100/AT1G14540/AT1G76080/AT1G45145/AT4G37520/AT2G18150/AT5G64120/AT4G11010/AT3G25530/AT3G28200/AT2G22420/AT1G09210/AT5G16970/AT4G39640/AT2G01140/AT5G44380/AT2G14170/AT5G64100/AT1G13440/AT2G29450/AT5G39580
GO:0006096	BP	glycolytic process	19	1.26181e-15	4.47943e-14	AT4G38970/AT3G12780/AT2G21330/AT2G21170/AT3G08590/AT1G79550/AT3G04120/AT3G55440/AT4G26530/AT3G52930/AT2G36530/AT5G42740/AT5G50850/AT1G01090/AT4G24620/AT1G59900/AT2G01140/AT2G36460/AT1G13440
GO:0042744	BP	hydrogen peroxide catabolic process	23	1.97752e-15	6.382e-14	AT5G19890/AT5G05340/AT2G37130/AT1G77490/AT4G33420/AT5G34850/AT3G49120/AT1G20620/AT5G06720/AT4G35090/AT4G11290/AT1G05260/AT4G37530/AT1G14540/AT4G37520/AT2G18150/AT5G64120/AT3G28200/AT2G22420/AT1G07890/AT4G08390/AT5G64100/AT5G39580
GO:0042742	BP	defense response to bacterium	35	2.53314e-14	7.49388e-13	AT3G01500/AT1G20020/AT5G66190/AT1G09340/AT3G49120/AT1G08830/AT5G09650/AT3G01480/AT3G63190/AT3G11630/AT4G23100/AT3G04790/AT3G14210/AT1G53240/AT1G65930/AT1G80600/AT3G55800/AT3G10920/AT3G14420/AT1G79210/AT3G52960/AT1G06680/AT5G06290/AT4G02520/AT5G08280/AT3G16640/AT5G02500/AT5G50850/AT2G37660/AT1G32060/AT1G73260/AT2G39730/AT3G04720/AT1G13440/AT3G27850
GO:0034599	BP	cellular response to oxidative stress	14	9.12493e-10	1.9055e-08	AT1G50320/AT1G03680/AT3G15360/AT1G77490/AT5G42980/AT1G08830/AT4G03520/AT2G28190/AT4G25130/AT3G02730/AT1G76080/AT1G45145/AT1G07890/AT4G08390
GO:0045454	BP	cell redox homeostasis	22	4.48338e-09	7.57905e-08	AT1G50320/AT1G03680/AT3G15360/AT5G42980/AT4G35090/AT4G03520/AT3G11630/AT1G48030/AT3G52880/AT3G26060/AT3G02730/AT1G76080/AT3G52960/AT5G06290/AT1G45145/AT3G54660/AT4G16155/AT5G40370/AT3G24170/AT1G21750/AT1G77510/AT2G20270
GO:0006099	BP	tricarboxylic acid cycle	12	4.44169e-07	4.3248e-06	AT2G05710/AT1G04410/AT1G53240/AT1G65930/AT4G35830/AT5G09660/AT2G20420/AT5G58330/AT2G42600/AT2G44350/AT1G53310/AT3G47520
GO:0009853	BP	photorespiration	10	8.4161e-07	1.14912e-05	ATCG00490/AT2G13360/AT5G36790/AT5G38430/AT1G67090/AT5G38420/AT4G37930/AT1G23310/AT5G04140/AT1G80380
GO:0071555	BP	cell wall organization	28	1.94707e-06	1.80104e-05	AT5G41870/AT5G57550/AT5G23870/AT5G45280/AT5G58480/AT2G46930/AT3G62060/AT4G34480/AT5G08370/AT5G08380/AT3G05910/AT4G13340/AT4G18670/AT4G37800/AT5G65730/AT3G02230/AT1G68560/AT3G56310/AT4G19410/AT4G23820/AT4G19420/AT5G42100/AT2G06850/AT3G09410/AT2G38540/AT1G57590/AT4G13080/AT1G05570
GO:0015995	BP	chlorophyll biosynthetic process	9	2.26813e-06	2.75617e-05	AT3G48730/AT5G63570/AT5G08280/AT2G40490/AT1G03475/AT3G14930/AT5G16440/AT3G02780/AT1G69740
GO:0016042	BP	lipid catabolic process	18	2.28731e-06	2.75617e-05	AT3G05180/AT3G48460/AT1G54790/AT1G28600/AT1G29660/AT2G03980/AT3G14210/AT5G14450/AT4G18970/AT1G29670/AT3G15730/AT1G53920/AT4G01130/AT3G16370/AT1G28670/AT5G55050/AT1G09390/AT1G33811
GO:0043086	BP	negative regulation of catalytic activity	4	3.56139e-06	3.83119e-05	AT1G03680/AT3G15360/AT1G47960/AT3G02730
GO:0006040	BP	amino sugar metabolic process	6	3.84172e-06	4.01121e-05	AT3G12500/AT2G43570/AT3G54420/AT2G43590/AT2G43620/AT3G04720
GO:0009416	BP	response to light stimulus	14	1.03117e-05	0.000100126	AT3G49120/AT1G20620/AT4G35090/AT4G37930/AT5G04140/AT1G79550/AT4G38740/AT4G25130/AT2G36530/AT3G62410/AT1G55480/AT2G39730/AT1G79440/AT1G66180
GO:0006109	BP	regulation of carbohydrate metabolic process	4	1.04356e-05	0.000100126	AT1G03680/AT3G15360/AT3G02730/AT1G13900
GO:0006662	BP	glycerol ether metabolic process	8	2.10563e-05	0.00019671	AT1G50320/AT1G03680/AT3G15360/AT5G42980/AT4G03520/AT3G02730/AT1G76080/AT1G45145
GO:0019222	BP	regulation of metabolic process	3	3.6714e-05	0.000270686	AT4G09000/AT5G38480/AT5G65430
GO:0015979	BP	photosynthesis	14	3.80424e-05	0.000270686	AT3G01500/AT3G55330/AT1G20020/AT1G67090/AT3G54050/AT1G43670/AT2G42600/AT4G21280/AT5G16440/AT1G55480/AT3G02780/AT4G15530/AT2G40300/AT1G53310
GO:0043085	BP	positive regulation of catalytic activity	5	3.41007e-05	0.000302644	AT1G50320/AT1G03680/AT3G15360/AT4G03520/AT3G02730
GO:0006749	BP	glutathione metabolic process	9	6.66818e-05	0.000538001	AT1G78380/AT4G02520/AT3G54660/AT3G24170/AT1G57720/AT5G02790/AT1G09640/AT2G29450/AT2G30870
GO:0035999	BP	tetrahydrofolate interconversion	5	7.08647e-05	0.000559044	AT4G13930/AT4G37930/AT1G50480/AT4G32520/AT3G59970
GO:0000103	BP	sulfate assimilation	8	9.38541e-05	0.000682011	AT1G50320/AT1G03680/AT3G15360/AT5G42980/AT4G03520/AT3G02730/AT1G76080/AT1G45145
GO:0009590	BP	detection of gravity	3	9.78747e-05	0.000682011	AT1G70730/AT5G51820/AT1G23190
GO:0030388	BP	fructose 1,6-bisphosphate metabolic process	3	9.78747e-05	0.000682011	AT3G54050/AT3G55800/AT1G43670
GO:0016998	BP	cell wall macromolecule catabolic process	5	9.7979e-05	0.000682011	AT3G12500/AT2G43570/AT3G54420/AT2G43590/AT2G43620
GO:0019222	BP	regulation of metabolic process	3	7.5775e-05	0.000690395	AT4G09000/AT5G38480/AT5G65430
GO:0009408	BP	response to heat	13	0.000159134	0.00102714	AT3G12580/AT5G42980/AT5G57560/AT4G23100/AT1G79550/AT3G04120/AT1G35720/AT4G26840/AT5G49910/AT5G02500/AT1G07890/AT1G79440/AT2G04030
GO:0009664	BP	plant-type cell wall organization	10	0.000250254	0.00153173	AT2G37130/AT4G33420/AT2G40610/AT4G11290/AT1G05260/AT5G57560/AT5G64120/AT1G20190/AT5G64100/AT5G39580
GO:0042545	BP	cell wall modification	9	0.0003034	0.00182433	AT4G33220/AT5G09760/AT1G05310/AT3G10720/AT5G53370/AT2G45220/AT3G59010/AT3G49220/AT3G14310
GO:0009631	BP	cold acclimation	7	0.000308337	0.00182433	AT1G77490/AT1G56070/AT1G20450/AT5G38480/AT1G20440/AT1G76180/AT4G24770
GO:0006508	BP	proteolysis	12	0.000359774	0.00209377	AT3G54400/AT1G09750/AT1G47128/AT5G10770/AT1G03220/AT1G20160/AT1G63770/AT2G22980/AT2G22990/AT5G10760/AT1G66180/AT4G30610
GO:0010188	BP	response to microbial phytotoxin	3	0.000468254	0.00268113	AT4G23600/AT5G42980/AT1G45145
GO:0009408	BP	response to heat	13	0.000537574	0.00342935	AT3G12580/AT5G42980/AT5G57560/AT4G23100/AT1G79550/AT3G04120/AT1G35720/AT4G26840/AT5G49910/AT5G02500/AT1G07890/AT1G79440/AT2G04030
GO:0010497	BP	plasmodesmata-mediated intercellular transport	4	0.000683892	0.00421734	AT1G02335/AT3G62020/AT1G09560/AT2G33330
GO:0006457	BP	protein folding	18	0.000710839	0.00448376	AT1G50320/AT1G03680/AT3G15360/AT5G42980/AT4G03520/AT3G01480/AT4G38740/AT3G16420/AT3G02730/AT1G76080/AT3G62030/AT1G45145/AT5G49910/AT2G28000/AT1G21750/AT1G09210/AT5G13120/AT2G04030
GO:0010442	BP	guard cell morphogenesis	2	0.000856722	0.00453935	AT4G26690/AT5G55480
GO:0010193	BP	response to ozone	5	0.00100323	0.00523744	AT1G08830/AT1G19570/AT4G23100/AT4G25100/AT2G06050
GO:0051775	BP	response to redox state	2	0.00179471	0.00919789	AT3G04120/AT5G58330
GO:0009854	BP	oxidative photosynthetic carbon pathway	3	0.00184119	0.00920595	AT1G68010/AT3G14420/AT1G80380
GO:0080153	BP	negative regulation of reductive pentose-phosphate cycle	2	0.00252014	0.0121801	AT2G47400/AT3G62410
GO:0006097	BP	glyoxylate cycle	3	0.00257327	0.0121801	AT2G05710/AT5G09660/AT3G16910
GO:0030163	BP	protein catabolic process	9	0.00326539	0.0152528	AT3G18490/AT3G54400/AT1G09750/AT5G10770/AT1G03220/AT5G42790/AT3G12700/AT5G10760/AT1G66180
GO:0080027	BP	response to herbivore	3	0.00369755	0.0171012	AT3G16400/AT4G15210/AT3G04720
GO:0006783	BP	heme biosynthetic process	3	0.00451586	0.0205529	AT2G40490/AT3G14930/AT1G69740
GO:0009617	BP	response to bacterium	8	0.00471276	0.0207586	AT3G57240/AT3G12580/AT3G54420/AT4G18760/AT1G12240/AT2G45220/AT1G62660/AT5G60600
GO:0055114	BP	oxidation-reduction process	14	0.00457341	0.0208344	AT1G50320/AT1G03680/AT3G15360/AT3G07390/AT5G20230/AT4G03520/AT1G23740/AT3G02730/AT1G76080/AT2G44790/AT4G09670/AT1G20340/AT5G53560/AT2G02850
GO:0006955	BP	immune response	3	0.00525531	0.0215468	AT3G61440/AT5G60360/AT1G21880
GO:0009611	BP	response to wounding	13	0.00530435	0.022821	AT4G23600/AT3G15356/AT2G38870/AT1G09340/AT3G54420/AT3G16470/AT2G34810/AT5G18860/AT1G73260/AT2G02990/AT3G13790/AT1G55480/AT4G16760
GO:0009862	BP	systemic acquired resistance, salicylic acid mediated signaling pathway	3	0.00574397	0.0258115	AT4G33680/AT5G60600/AT5G48485
GO:0009615	BP	response to virus	5	0.0064537	0.0271349	AT2G43570/AT3G12580/AT1G75040/AT5G02500/AT3G04720
GO:0009737	BP	response to abscisic acid	19	0.0064427	0.0282365	AT3G18490/AT4G23600/AT5G26000/AT2G05710/AT4G25000/AT4G38970/AT4G19810/AT3G22060/AT1G35720/AT1G22300/AT2G36530/AT5G25980/AT5G02240/AT1G43670/AT3G15730/AT1G20450/AT1G20440/AT1G76180/AT5G14920
GO:0042546	BP	cell wall biogenesis	6	0.00686269	0.0297104	AT4G30270/AT5G57560/AT4G37800/AT5G65730/AT2G06850/AT4G13080
GO:0002213	BP	defense response to insect	3	0.00715304	0.0302301	AT5G26000/AT4G23100/AT5G25980
GO:2000280	BP	regulation of root development	3	0.00715304	0.0302301	AT1G02335/AT3G62020/AT1G09560
GO:0006011	BP	UDP-glucose metabolic process	2	0.00807777	0.0325864	AT3G03250/AT5G17310
GO:0010623	BP	programmed cell death involved in cell development	2	0.00807777	0.0325864	AT1G20850/AT4G35350
GO:0042989	BP	sequestering of actin monomers	2	0.00807777	0.0325864	AT4G29350/AT2G19760
GO:0044262	BP	cellular carbohydrate metabolic process	2	0.00807777	0.0325864	AT3G55440/AT5G61410
GO:0010623	BP	programmed cell death involved in cell development	2	0.0103482	0.041618	AT1G20850/AT4G35350
GO:0044262	BP	cellular carbohydrate metabolic process	2	0.0103482	0.041618	AT3G55440/AT5G61410
GO:0006807	BP	nitrogen compound metabolic process	4	0.0107535	0.0419897	AT1G65960/AT5G12040/AT5G18170/AT3G44310
GO:0006002	BP	fructose 6-phosphate metabolic process	3	0.0105368	0.0420288	AT3G54050/AT3G55800/AT1G43670
GO:0009407	BP	toxin catabolic process	5	0.010806	0.0426236	AT1G78380/AT4G02520/AT1G78370/AT2G29450/AT2G30870
GO:0009414	BP	response to water deprivation	14	0.0111381	0.0434508	AT3G46970/AT3G18490/AT4G20260/AT2G26740/AT2G14610/AT1G35720/AT1G76080/AT5G65730/AT2G38530/AT1G74920/AT1G20450/AT1G20440/AT2G04030/AT2G30870
GO:0000050	BP	urea cycle	2	0.0118825	0.0448755	AT4G08870/AT1G75330
GO:0010037	BP	response to carbon dioxide	2	0.0118825	0.0448755	AT3G01500/AT1G20160
GO:2000122	BP	negative regulation of stomatal complex development	2	0.0118825	0.0448755	AT3G01500/AT1G20160
GO:0000302	BP	response to reactive oxygen species	4	0.0122483	0.0457701	AT1G77490/AT1G07890/AT4G08390/AT2G40300
GO:0042546	BP	cell wall biogenesis	6	0.0124023	0.0488174	AT4G30270/AT5G57560/AT4G37800/AT5G65730/AT2G06850/AT4G13080
GO:0009052	BP	pentose-phosphate shunt, non-oxidative branch	2	0.0163149	0.0573444	AT3G04790/AT5G61410
GO:0010019	BP	chloroplast-nucleus signaling pathway	2	0.0163149	0.0573444	AT1G77490/AT3G12700
GO:0051085	BP	chaperone cofactor-dependent protein refolding	2	0.0163149	0.0573444	AT1G55490/AT5G20720
GO:0019748	BP	secondary metabolic process	4	0.0172777	0.0643989	AT4G12910/AT2G22980/AT2G33530/AT1G28110
GO:0006790	BP	sulfur compound metabolic process	3	0.0176227	0.0652039	AT3G01910/AT5G04590/AT5G63980
GO:0034976	BP	response to endoplasmic reticulum stress	3	0.0196729	0.0678047	AT5G42020/AT1G21750/AT1G77510
GO:0010019	BP	chloroplast-nucleus signaling pathway	2	0.0207897	0.0686804	AT1G77490/AT3G12700
GO:0015977	BP	carbon fixation	2	0.0207897	0.0686804	AT2G42600/AT1G53310
GO:0050790	BP	regulation of catalytic activity	2	0.0207897	0.0686804	AT4G23690/AT4G01610
GO:0071669	BP	plant-type cell wall organization or biogenesis	2	0.0207897	0.0686804	AT4G30270/AT3G02230
GO:0010214	BP	seed coat development	3	0.0224628	0.0759457	AT5G49360/AT5G67360/AT3G48990
GO:0052543	BP	callose deposition in cell wall	2	0.0269046	0.0781891	AT3G03250/AT5G17310
GO:0009753	BP	response to jasmonic acid	9	0.0292931	0.0781891	AT4G23600/AT4G19810/AT3G16470/AT1G19570/AT4G23100/AT2G34810/AT5G18860/AT2G39730/AT5G27380
GO:0005996	BP	monosaccharide metabolic process	1	0.0292934	0.0781891	AT1G09340
GO:0010157	BP	response to chlorate	1	0.0292934	0.0781891	AT2G04030
GO:0010477	BP	response to sulfur dioxide	1	0.0292934	0.0781891	AT3G01910
GO:0016051	BP	carbohydrate biosynthetic process	1	0.0292934	0.0781891	AT3G55800
GO:0019424	BP	sulfide oxidation, using siroheme sulfite reductase	1	0.0292934	0.0781891	AT5G04590
GO:0019500	BP	cyanide catabolic process	1	0.0292934	0.0781891	AT3G61440
GO:0040014	BP	regulation of multicellular organism growth	1	0.0292934	0.0781891	AT3G16640
GO:0044843	BP	cell cycle G1/S phase transition	1	0.0292934	0.0781891	AT3G51800
GO:0046294	BP	formaldehyde catabolic process	1	0.0292934	0.0781891	AT2G41530
GO:0051336	BP	regulation of hydrolase activity	1	0.0292934	0.0781891	AT3G16420
GO:0071588	BP	hydrogen peroxide mediated signaling pathway	1	0.0292934	0.0781891	AT1G77490
GO:0080094	BP	response to trehalose-6-phosphate	1	0.0292934	0.0781891	AT3G09820
GO:0080114	BP	positive regulation of glycine hydroxymethyltransferase activity	1	0.0292934	0.0781891	AT5G04140
GO:1901671	BP	positive regulation of superoxide dismutase activity	1	0.0292934	0.0781891	AT5G20720
GO:0006734	BP	NADH metabolic process	2	0.0240301	0.0788187	AT1G04410/AT5G58330
GO:0019676	BP	ammonia assimilation cycle	2	0.0240301	0.0788187	AT5G04140/AT5G35630
GO:1901657	BP	glycosyl compound metabolic process	3	0.0320525	0.0842862	AT1G61820/AT1G26560/AT3G18080
GO:0010119	BP	regulation of stomatal movement	4	0.0339177	0.087889	AT5G26000/AT3G01500/AT5G25980/AT3G15730
GO:0009612	BP	response to mechanical stimulus	2	0.0271151	0.088005	AT5G57560/AT2G06850
GO:0009414	BP	response to water deprivation	14	0.0295517	0.0892568	AT3G46970/AT3G18490/AT4G20260/AT2G26740/AT2G14610/AT1G35720/AT1G76080/AT5G65730/AT2G38530/AT1G74920/AT1G20450/AT1G20440/AT2G04030/AT2G30870
GO:0010214	BP	seed coat development	3	0.031253	0.0892568	AT5G49360/AT5G67360/AT3G48990
GO:0005996	BP	monosaccharide metabolic process	1	0.0332904	0.0892568	AT1G09340
GO:0040014	BP	regulation of multicellular organism growth	1	0.0332904	0.0892568	AT3G16640
GO:0071588	BP	hydrogen peroxide mediated signaling pathway	1	0.0332904	0.0892568	AT1G77490
GO:0009856	BP	pollination	1	0.0332904	0.0892568	AT2G02850
GO:0051014	BP	actin filament severing	1	0.0332904	0.0892568	AT3G57410
GO:0042631	BP	cellular response to water deprivation	3	0.0394513	0.0974986	AT1G09340/AT1G68010/AT1G78380
GO:0001558	BP	regulation of cell growth	2	0.0395487	0.0974986	AT3G16640/AT3G51800
GO:0009308	BP	amine metabolic process	2	0.0395487	0.0974986	AT1G31690/AT3G43670
GO:0009704	BP	de-etiolation	2	0.0395487	0.0974986	AT4G38740/AT2G04030
GO:0009932	BP	cell tip growth	2	0.0395487	0.0974986	AT4G12420/AT4G26690
GO:0015976	BP	carbon utilization	2	0.0258329	0.0986247	AT3G01500/AT5G14740
GO:0048511	BP	rhythmic process	3	0.0328749	0.0986247	AT2G37130/AT4G37520/AT5G64120
GO:0042026	BP	protein refolding	2	0.0417057	0.110222	AT2G28000/AT1G55490
GO:0009856	BP	pollination	1	0.0424116	0.112186	AT2G02850
GO:0045730	BP	respiratory burst	1	0.0424116	0.112186	AT5G64120
GO:0008652	BP	cellular amino acid biosynthetic process	5	0.0464363	0.112429	AT3G61440/AT3G20390/AT4G14880/AT5G04140/AT2G43750
GO:0015996	BP	chlorophyll catabolic process	2	0.0465553	0.112429	AT2G20890/AT4G37000
GO:0043067	BP	regulation of programmed cell death	2	0.0465553	0.112429	AT1G21750/AT4G37000
GO:0009407	BP	toxin catabolic process	5	0.0441424	0.113115	AT1G78380/AT4G02520/AT1G78370/AT2G29450/AT2G30870
GO:0009636	BP	response to toxic substance	5	0.0461935	0.118692	AT3G20390/AT5G02790/AT1G78370/AT2G29450/AT2G30870
GO:0050832	BP	defense response to fungus	20	0.0495125	0.118763	AT2G37130/AT3G12500/AT2G38870/AT4G08870/AT5G42980/AT3G49120/AT5G20230/AT5G09440/AT1G27950/AT1G47128/AT4G23100/AT3G16530/AT1G45145/AT4G02520/AT5G64120/AT5G02500/AT1G20440/AT3G48990/AT2G43510/AT5G39580
GO:0048354	BP	mucilage biosynthetic process involved in seed coat development	2	0.0539755	0.121989	AT3G46550/AT5G63800
GO:0002215	BP	defense response to nematode	1	0.05773	0.121989	AT5G06720
GO:0006069	BP	ethanol oxidation	1	0.05773	0.121989	AT5G43940
GO:0006560	BP	proline metabolic process	1	0.05773	0.121989	AT4G08870
GO:0009820	BP	alkaloid metabolic process	1	0.05773	0.121989	AT1G74000
GO:0019285	BP	glycine betaine biosynthetic process from choline	1	0.05773	0.121989	AT1G74920
GO:0019499	BP	cyanide metabolic process	1	0.05773	0.121989	AT3G61440
GO:0043489	BP	RNA stabilization	1	0.05773	0.121989	AT4G24770
GO:0051410	BP	detoxification of nitrogen compound	1	0.05773	0.121989	AT3G61440
GO:0051511	BP	negative regulation of unidimensional cell growth	1	0.05773	0.121989	AT4G20260
GO:0071454	BP	cellular response to anoxia	1	0.05773	0.121989	AT3G62410
GO:1900409	BP	positive regulation of cellular response to oxidative stress	1	0.05773	0.121989	AT3G14990
GO:0010119	BP	regulation of stomatal movement	4	0.0502503	0.123951	AT5G26000/AT3G01500/AT5G25980/AT3G15730
GO:0001558	BP	regulation of cell growth	2	0.0498716	0.123951	AT3G16640/AT3G51800
GO:0009625	BP	response to insect	3	0.0490418	0.123951	AT5G26000/AT3G14210/AT1G73260
GO:0006520	BP	cellular amino acid metabolic process	3	0.0613318	0.127652	AT4G23600/AT5G07440/AT5G18170
GO:0006098	BP	pentose-phosphate shunt	2	0.0617793	0.127652	AT3G55440/AT5G13420
GO:0009269	BP	response to desiccation	2	0.0617793	0.127652	AT1G05260/AT1G76180
GO:0042542	BP	response to hydrogen peroxide	4	0.0618481	0.127652	AT3G12580/AT5G63310/AT3G04120/AT1G73260
GO:0006069	BP	ethanol oxidation	1	0.0654743	0.144199	AT5G43940
GO:0019499	BP	cyanide metabolic process	1	0.0654743	0.144199	AT3G61440
GO:1900409	BP	positive regulation of cellular response to oxidative stress	1	0.0654743	0.144199	AT3G14990
GO:0043903	BP	regulation of symbiotic process	1	0.0654743	0.144199	AT1G19570
GO:0010286	BP	heat acclimation	3	0.0713656	0.145602	AT5G42980/AT4G26840/AT1G20440
GO:0048354	BP	mucilage biosynthetic process involved in seed coat development	2	0.067715	0.145666	AT3G46550/AT5G63800
GO:0046685	BP	response to arsenic-containing substance	2	0.067715	0.145666	AT4G16155/AT5G42790
GO:0019538	BP	protein metabolic process	2	0.0784236	0.159088	AT3G48870/AT4G12060
GO:0009620	BP	response to fungus	5	0.0758325	0.159421	AT5G08370/AT2G45220/AT3G14310/AT4G16760/AT2G06050
GO:0007568	BP	aging	2	0.0644575	0.160167	AT4G14880/AT5G35630
GO:0009967	BP	positive regulation of signal transduction	1	0.085335	0.160285	AT1G18080
GO:0010363	BP	regulation of plant-type hypersensitive response	1	0.085335	0.160285	AT4G37000
GO:0080187	BP	floral organ senescence	1	0.085335	0.160285	AT1G11190
GO:2000030	BP	regulation of response to red or far red light	1	0.085335	0.160285	AT1G78370
GO:2000038	BP	regulation of stomatal complex development	1	0.085335	0.160285	AT1G20160
GO:0072593	BP	reactive oxygen species metabolic process	2	0.077308	0.160696	AT3G49120/AT1G79440
GO:0006952	BP	defense response	21	0.0787488	0.161873	AT4G16500/AT5G58480/AT4G31140/AT3G54420/AT3G49120/AT2G43590/AT5G58090/AT4G18760/AT5G47550/AT2G43620/AT1G70890/AT1G19570/AT2G14610/AT1G21880/AT2G43910/AT1G20850/AT5G23820/AT5G42100/AT1G66250/AT2G43510/AT1G11820
GO:0008299	BP	isoprenoid biosynthetic process	2	0.0872107	0.162093	AT3G02780/AT5G48230
GO:0043171	BP	peptide catabolic process	2	0.0872107	0.162093	AT1G63770/AT4G33090
GO:0010150	BP	leaf senescence	5	0.0890916	0.164727	AT2G43570/AT4G30920/AT3G14067/AT2G39730/AT1G11190
GO:0006520	BP	cellular amino acid metabolic process	3	0.0829634	0.168662	AT4G23600/AT5G07440/AT5G18170
GO:0010026	BP	trichome differentiation	2	0.0962742	0.176172	AT4G26690/AT5G55480
GO:0010229	BP	inflorescence development	2	0.0962742	0.176172	AT4G29350/AT2G19760
GO:0019538	BP	protein metabolic process	2	0.0976419	0.182462	AT3G48870/AT4G12060
GO:0009967	BP	positive regulation of signal transduction	1	0.0965885	0.182462	AT1G18080
GO:0080187	BP	floral organ senescence	1	0.0965885	0.182462	AT1G11190
GO:2000030	BP	regulation of response to red or far red light	1	0.0965885	0.182462	AT1G78370
GO:0012501	BP	programmed cell death	2	0.0976419	0.182462	AT4G23170/AT1G73260
GO:0051410	BP	detoxification of nitrogen compound	1	0.0830285	0.18912	AT3G61440
GO:0043903	BP	regulation of symbiotic process	1	0.0830285	0.18912	AT1G19570
GO:0044419	BP	interspecies interaction between organisms	1	0.0847696	0.190732	AT1G80600
GO:0002237	BP	response to molecule of bacterial origin	2	0.10559	0.192229	AT1G79550/AT1G73260
GO:0009399	BP	nitrogen fixation	1	0.112132	0.198045	AT1G66200
GO:0009443	BP	pyridoxal 5'-phosphate salvage	1	0.112132	0.198045	AT5G37850
GO:0009649	BP	entrainment of circadian clock	1	0.112132	0.198045	AT5G63860
GO:0010476	BP	gibberellin mediated signaling pathway	1	0.112132	0.198045	AT1G18080
GO:0080167	BP	response to karrikin	7	0.112905	0.208874	AT1G53070/AT5G48540/AT5G66920/AT3G52930/AT5G63810/AT5G25460/AT3G13790
GO:0006869	BP	lipid transport	5	0.120184	0.211214	AT1G27950/AT2G38530/AT3G08770/AT5G48485/AT2G38540
GO:0009649	BP	entrainment of circadian clock	1	0.126668	0.225324	AT5G63860
GO:0071456	BP	cellular response to hypoxia	2	0.134835	0.23465	AT1G14540/AT1G26380
GO:0043433	BP	negative regulation of DNA-binding transcription factor activity	1	0.138146	0.23465	AT4G26840
GO:0080001	BP	mucilage extrusion from seed coat	1	0.138146	0.23465	AT5G67360
GO:0009826	BP	unidimensional cell growth	4	0.143735	0.24298	AT5G07830/AT3G49120/AT2G19760/AT2G06850
GO:0006739	BP	NADP metabolic process	1	0.121926	0.243853	AT1G65930
GO:0007154	BP	cell communication	1	0.121926	0.243853	AT5G42100
GO:0032504	BP	multicellular organism reproduction	1	0.121926	0.243853	AT2G21170
GO:0009791	BP	post-embryonic development	2	0.155211	0.260612	AT3G16640/AT1G62750
GO:0009860	BP	pollen tube growth	5	0.155633	0.260612	AT4G14880/AT2G43750/AT3G16640/AT1G72150/AT5G48230
GO:0009823	BP	cytokinin catabolic process	1	0.163399	0.266085	AT4G29740
GO:0033356	BP	UDP-L-arabinose metabolic process	1	0.163399	0.266085	AT3G02230
GO:0048359	BP	mucilage metabolic process involved in seed coat development	1	0.163399	0.266085	AT5G67360
GO:0043433	BP	negative regulation of DNA-binding transcription factor activity	1	0.155748	0.266791	AT4G26840
GO:0080001	BP	mucilage extrusion from seed coat	1	0.155748	0.266791	AT5G67360
GO:0002238	BP	response to molecule of fungal origin	1	0.187913	0.293873	AT1G73260
GO:0006665	BP	sphingolipid metabolic process	1	0.187913	0.293873	AT2G38010
GO:0006986	BP	response to unfolded protein	1	0.187913	0.293873	AT5G20720
GO:0009819	BP	drought recovery	1	0.187913	0.293873	AT3G16640
GO:0050665	BP	hydrogen peroxide biosynthetic process	1	0.187913	0.293873	AT3G14420
GO:0071219	BP	cellular response to molecule of bacterial origin	1	0.187913	0.293873	AT4G20260
GO:1902290	BP	positive regulation of defense response to oomycetes	1	0.187913	0.293873	AT4G18760
GO:0048359	BP	mucilage metabolic process involved in seed coat development	1	0.183862	0.3037	AT5G67360
GO:0002239	BP	response to oomycetes	1	0.183862	0.3037	AT3G16530
GO:0070417	BP	cellular response to cold	2	0.197435	0.307409	AT5G20230/AT3G62410
GO:0009791	BP	post-embryonic development	2	0.189503	0.310248	AT3G16640/AT1G62750
GO:0009826	BP	unidimensional cell growth	4	0.197297	0.317391	AT5G07830/AT3G49120/AT2G19760/AT2G06850
GO:0009832	BP	plant-type cell wall biogenesis	2	0.208206	0.319817	AT5G57550/AT3G02230
GO:0006518	BP	peptide metabolic process	1	0.21171	0.319817	AT5G65620
GO:0006796	BP	phosphate-containing compound metabolic process	1	0.21171	0.319817	AT5G09650
GO:0009051	BP	pentose-phosphate shunt, oxidative branch	1	0.21171	0.319817	AT5G11670
GO:0010358	BP	leaf shaping	1	0.21171	0.319817	AT3G15730
GO:0009555	BP	pollen development	7	0.232004	0.34163	AT2G01820/AT3G08590/AT3G03250/AT3G23940/AT3G02230/AT5G17310/AT5G63890
GO:0009808	BP	lignin metabolic process	1	0.23481	0.34163	AT5G64120
GO:0019760	BP	glucosinolate metabolic process	1	0.23481	0.34163	AT4G30530
GO:0009860	BP	pollen tube growth	5	0.221823	0.347773	AT4G14880/AT2G43750/AT3G16640/AT1G72150/AT5G48230
GO:0071554	BP	cell wall organization or biogenesis	3	0.184133	0.355412	AT2G34070/AT1G29050/AT3G14850
GO:0009058	BP	biosynthetic process	4	0.186375	0.355412	AT4G23600/AT1G17290/AT4G31990/AT1G74000
GO:0043433	BP	negative regulation of DNA-binding transcription factor activity	1	0.194853	0.363135	AT4G26840
GO:0009567	BP	double fertilization forming a zygote and endosperm	2	0.251756	0.364789	AT4G14880/AT2G43750
GO:0009610	BP	response to symbiotic fungus	1	0.257235	0.366741	AT1G19570
GO:0010262	BP	somatic embryogenesis	1	0.257235	0.366741	AT3G54420
GO:0043069	BP	negative regulation of programmed cell death	1	0.257235	0.366741	AT4G34180
GO:0090333	BP	regulation of stomatal closure	1	0.257235	0.366741	AT3G16640
GO:0010358	BP	leaf shaping	1	0.237316	0.368936	AT3G15730
GO:0009911	BP	positive regulation of flower development	2	0.262701	0.373035	AT5G08370/AT4G24620
GO:0008152	BP	metabolic process	5	0.228742	0.384768	AT5G13690/AT3G48420/AT4G34260/AT1G67830/AT2G30200
GO:0048316	BP	seed development	3	0.27287	0.385932	AT3G04120/AT1G21750/AT1G53580
GO:0006949	BP	syncytium formation	1	0.279004	0.393041	AT2G40610
GO:0009698	BP	phenylpropanoid metabolic process	1	0.300135	0.414584	AT2G22990
GO:0010192	BP	mucilage biosynthetic process	1	0.300135	0.414584	AT3G46550
GO:0046470	BP	phosphatidylcholine metabolic process	1	0.300135	0.414584	AT3G15730
GO:0048359	BP	mucilage metabolic process involved in seed coat development	1	0.229017	0.417321	AT5G67360
GO:0061077	BP	chaperone-mediated protein folding	2	0.276178	0.422256	AT5G45680/AT5G56030
GO:0009845	BP	seed germination	3	0.313015	0.430699	AT3G15730/AT1G62750/AT1G18080
GO:0007346	BP	regulation of mitotic cell cycle	1	0.320649	0.434467	AT3G16640
GO:0010015	BP	root morphogenesis	1	0.320649	0.434467	AT5G25460
GO:0009626	BP	plant-type hypersensitive response	3	0.329136	0.44427	AT3G12500/AT4G37930/AT4G38740
GO:0009567	BP	double fertilization forming a zygote and endosperm	2	0.301058	0.44916	AT4G14880/AT2G43750
GO:0008219	BP	cell death	2	0.254931	0.454443	AT4G35090/AT1G55490
GO:0006880	BP	intracellular sequestering of iron ion	1	0.340562	0.454509	AT2G40300
GO:0010030	BP	positive regulation of seed germination	1	0.340562	0.454509	AT3G48990
GO:0042335	BP	cuticle development	1	0.340562	0.454509	AT1G27950
GO:0009911	BP	positive regulation of flower development	2	0.313448	0.456597	AT5G08370/AT4G24620
GO:0006949	BP	syncytium formation	1	0.311014	0.456597	AT2G40610
GO:0090332	BP	stomatal closure	1	0.311014	0.456597	AT5G02500
GO:0009793	BP	embryo development ending in seed dormancy	9	0.344628	0.458214	AT3G63190/AT3G10920/AT3G16640/AT2G28000/AT2G34790/AT1G21750/AT1G07890/AT1G53580/AT3G47520
GO:0042128	BP	nitrate assimilation	2	0.349596	0.463084	AT2G15620/AT3G01910
GO:0001666	BP	response to hypoxia	2	0.325789	0.467216	AT1G17290/AT1G23310
GO:0016032	BP	viral process	2	0.325789	0.467216	AT4G20260/AT3G09820
GO:0009785	BP	blue light signaling pathway	1	0.359892	0.469712	AT4G38740
GO:0050826	BP	response to freezing	1	0.359892	0.469712	AT5G38480
GO:1900426	BP	positive regulation of defense response to bacterium	1	0.359892	0.469712	AT4G18760
GO:0009791	BP	post-embryonic development	2	0.270894	0.471373	AT3G16640/AT1G62750
GO:0007623	BP	circadian rhythm	5	0.275926	0.471373	AT4G13930/AT1G09340/AT3G63140/AT4G37930/AT4G25100
GO:0009698	BP	phenylpropanoid metabolic process	1	0.333965	0.47163	AT2G22990
GO:0048316	BP	seed development	3	0.340926	0.477813	AT3G04120/AT1G21750/AT1G53580
GO:0009767	BP	photosynthetic electron transport chain	1	0.378657	0.485282	AT5G66190
GO:0010167	BP	response to nitrate	1	0.378657	0.485282	AT2G15620
GO:0010187	BP	negative regulation of seed germination	1	0.378657	0.485282	AT5G02500
GO:0052544	BP	defense response by callose deposition in cell wall	1	0.378657	0.485282	AT4G23100
GO:2000377	BP	regulation of reactive oxygen species metabolic process	1	0.378657	0.485282	AT5G14920
GO:0007155	BP	cell adhesion	1	0.293068	0.490441	AT3G46550
GO:0009266	BP	response to temperature stimulus	1	0.356152	0.491703	AT3G12580
GO:0019684	BP	photosynthesis, light reaction	1	0.396872	0.506797	AT1G06680
GO:0010030	BP	positive regulation of seed germination	1	0.377602	0.5099	AT3G48990
GO:0042335	BP	cuticle development	1	0.377602	0.5099	AT1G27950
GO:0009718	BP	anthocyanin-containing compound biosynthetic process	1	0.414554	0.520024	AT2G02990
GO:0010223	BP	secondary shoot formation	1	0.414554	0.520024	AT3G14067
GO:0051302	BP	regulation of cell division	1	0.414554	0.520024	AT3G51800
GO:0009624	BP	response to nematode	3	0.39562	0.530361	AT5G61410/AT1G73260/AT3G14310
GO:0009739	BP	response to gibberellin	3	0.440336	0.54657	AT4G25000/AT5G14920/AT1G18080
GO:0010187	BP	negative regulation of seed germination	1	0.418384	0.552865	AT5G02500
GO:0009825	BP	multidimensional cell growth	1	0.418384	0.552865	AT3G46550
GO:0006631	BP	fatty acid metabolic process	2	0.452719	0.558039	AT3G15730/AT3G10520
GO:0010228	BP	vegetative to reproductive phase transition of meristem	3	0.463345	0.562858	AT3G16470/AT3G12145/AT1G18080
GO:0009738	BP	abscisic acid-activated signaling pathway	6	0.463722	0.562858	AT5G26000/AT5G25980/AT1G12240/AT1G62660/AT3G15730/AT5G63980
GO:0009960	BP	endosperm development	1	0.464556	0.562858	AT1G53580
GO:0048653	BP	anther development	1	0.464556	0.562858	AT2G02850
GO:0080147	BP	root hair cell development	1	0.480257	0.57593	AT3G61440
GO:0010154	BP	fruit development	1	0.495498	0.5883	AT3G04120
GO:0034605	BP	cellular response to heat	1	0.495498	0.5883	AT3G62410
GO:0010223	BP	secondary shoot formation	1	0.456499	0.590575	AT3G14067
GO:0051302	BP	regulation of cell division	1	0.456499	0.590575	AT3G51800
GO:0009585	BP	red, far-red light phototransduction	2	0.500707	0.592503	AT5G63310/AT4G38740
GO:0009814	BP	defense response, incompatible interaction	1	0.510293	0.595901	AT4G37000
GO:0051726	BP	regulation of cell cycle	1	0.510293	0.595901	AT1G07370
GO:0006949	BP	syncytium formation	1	0.379328	0.609899	AT2G40610
GO:0009793	BP	embryo development ending in seed dormancy	9	0.491012	0.626464	AT3G63190/AT3G10920/AT3G16640/AT2G28000/AT2G34790/AT1G21750/AT1G07890/AT1G53580/AT3G47520
GO:0009960	BP	endosperm development	1	0.509046	0.640636	AT1G53580
GO:0048653	BP	anther development	1	0.509046	0.640636	AT2G02850
GO:0010182	BP	sugar mediated signaling pathway	1	0.565266	0.655783	AT2G20890
GO:0010197	BP	polar nucleus fusion	1	0.565266	0.655783	AT2G34790
GO:0006413	BP	translational initiation	1	0.525409	0.656762	AT3G13920
GO:0048364	BP	root development	4	0.572688	0.662228	AT5G55730/AT1G80600/AT3G23940/AT3G16640
GO:0010228	BP	vegetative to reproductive phase transition of meristem	3	0.549319	0.672917	AT3G16470/AT3G12145/AT1G18080
GO:0051726	BP	regulation of cell cycle	1	0.55652	0.672917	AT1G07370
GO:0009741	BP	response to brassinosteroid	1	0.590397	0.68049	AT5G57560
GO:0009789	BP	positive regulation of abscisic acid-activated signaling pathway	1	0.602413	0.68986	AT3G15730
GO:0006629	BP	lipid metabolic process	5	0.579735	0.691941	AT1G66970/AT1G74210/AT4G26690/AT5G67130/AT5G55480
GO:0006730	BP	one-carbon metabolic process	1	0.63816	0.747213	AT3G59970
GO:0007264	BP	small GTPase mediated signal transduction	3	0.658908	0.749719	AT5G20010/AT2G44100/AT3G59920
GO:0048573	BP	photoperiodism, flowering	1	0.667469	0.757034	AT5G48300
GO:0016125	BP	sterol metabolic process	1	0.677228	0.763225	AT5G48230
GO:0010029	BP	regulation of seed germination	1	0.661891	0.770124	AT1G20450
GO:0006974	BP	cellular response to DNA damage stimulus	1	0.6867	0.771451	AT5G54770
GO:0006623	BP	protein targeting to vacuole	1	0.673167	0.778349	AT2G14740
GO:0009845	BP	seed germination	3	0.54534	0.784524	AT3G15730/AT1G62750/AT1G18080
GO:0008283	BP	cell population proliferation	2	0.537128	0.784524	AT3G16640/AT1G22840
GO:0009846	BP	pollen germination	1	0.704821	0.786828	AT5G48230
GO:0098542	BP	defense response to other organism	1	0.713485	0.791522	AT5G02500
GO:0010468	BP	regulation of gene expression	2	0.721835	0.798291	AT1G09340/AT3G13920
GO:0048573	BP	photoperiodism, flowering	1	0.714639	0.811093	AT5G48300
GO:0008360	BP	regulation of cell shape	1	0.724158	0.811935	AT1G05570
GO:0009846	BP	pollen germination	1	0.750857	0.836798	AT5G48230
GO:0098542	BP	defense response to other organism	1	0.75917	0.840996	AT5G02500
GO:0009965	BP	leaf morphogenesis	1	0.774254	0.85096	AT5G08370
GO:0009908	BP	flower development	4	0.807876	0.878226	AT5G06720/AT4G23100/AT3G02780/AT2G40300
GO:0009734	BP	auxin-activated signaling pathway	4	0.823623	0.891421	AT3G07390/AT5G63310/AT4G02520/AT3G51800
GO:0048367	BP	shoot system development	1	0.846786	0.910936	AT5G55730
GO:0031347	BP	regulation of defense response	1	0.851287	0.912187	AT4G18760
GO:0009553	BP	embryo sac development	1	0.855657	0.912187	AT3G23940
GO:0045087	BP	innate immune response	1	0.859899	0.913964	AT4G24770
GO:0010118	BP	stomatal movement	1	0.662015	0.920088	AT3G08590
GO:0009873	BP	ethylene-activated signaling pathway	3	0.887938	0.940949	AT3G15356/AT3G15730/AT5G38480
GO:0006970	BP	response to osmotic stress	2	0.875636	0.947325	AT1G35720/AT1G20440
GO:0045087	BP	innate immune response	1	0.893405	0.955375	AT4G24770
GO:0009751	BP	response to salicylic acid	2	0.924986	0.974391	AT4G23170/AT1G73260
GO:0009723	BP	response to ethylene	1	0.947686	0.995351	AT3G04720
GO:0048573	BP	photoperiodism, flowering	1	0.799394	1	AT5G48300
GO:0009846	BP	pollen germination	1	0.831437	1	AT5G48230
GO:0007165	BP	signal transduction	2	0.999964	1	AT4G38740/AT5G21090
GO:0040008	BP	regulation of growth	1	0.985992	1	AT1G78370
GO:0031640	BP	killing of cells of other organism	3	0.999718	1	AT3G12500/AT3G04720/AT2G43510
GO:0007275	BP	multicellular organism development	1	0.999996	1	AT3G51800
GO:0009607	BP	response to biotic stimulus	1	0.890937	1	AT1G70890
GO:0007049	BP	cell cycle	2	0.965911	1	AT1G22530/AT1G72150
GO:0051301	BP	cell division	2	0.999094	1	AT1G22530/AT1G72150
GO:0009733	BP	response to auxin	3	0.972008	1	AT2G26740/AT5G57560/AT2G06850
GO:0010200	BP	response to chitin	1	0.975223	1	AT3G16530
GO:0007165	BP	signal transduction	2	0.998458	1	AT4G38740/AT5G21090
GO:0007165	BP	signal transduction	2	0.99949	1	AT4G38740/AT5G21090
GO:0015031	BP	protein transport	2	0.998792	1	AT2G44100/AT3G59920
GO:0040008	BP	regulation of growth	1	0.964107	1	AT1G78370
GO:0006810	BP	transport	2	0.981069	1	AT1G72150/AT5G13120
GO:0031640	BP	killing of cells of other organism	3	0.996953	1	AT3G12500/AT3G04720/AT2G43510
GO:0007275	BP	multicellular organism development	1	0.999932	1	AT3G51800

## Sheet: MF
GOIDs	Ontology	Description	Counts	pvalue	p.adjust	IDs
GO:0004601	MF	peroxidase activity	25	2.91589e-14	7.96262e-13	AT5G19890/AT5G05340/AT2G37130/AT4G33420/AT5G34850/AT3G49120/AT5G06720/AT1G78380/AT4G11290/AT1G05260/AT3G11630/AT4G37530/AT1G35720/AT1G14540/AT3G26060/AT3G52960/AT5G06290/AT4G02520/AT4G37520/AT2G18150/AT5G64120/AT3G28200/AT2G22420/AT5G64100/AT5G39580
GO:0050660	MF	flavin adenine dinucleotide binding	23	6.16572e-11	1.36802e-09	AT1G26420/AT4G20840/AT4G20830/AT1G30720/AT4G20860/AT5G44390/AT1G48030/AT3G52880/AT2G46760/AT2G34810/AT4G29740/AT3G54660/AT4G16155/AT3G24170/AT2G34790/AT5G44400/AT4G16760/AT1G26390/AT5G44380/AT3G45300/AT1G06290/AT5G11540/AT1G26380
GO:0030170	MF	pyridoxal phosphate binding	19	4.18213e-09	7.42328e-08	AT3G46970/AT4G23600/AT4G13930/AT4G33680/AT1G17290/AT3G61440/AT4G14880/AT4G31990/AT3G48730/AT1G80600/AT4G37930/AT1G23310/AT2G43750/AT5G63570/AT1G65960/AT5G57850/AT3G49680/AT3G22200/AT4G32520
GO:0016788	MF	hydrolase activity, acting on ester bonds	18	1.4377e-08	2.04596e-07	AT3G05180/AT3G48460/AT1G54790/AT1G28600/AT1G29660/AT2G03980/AT3G14210/AT5G14450/AT1G67830/AT2G23600/AT4G18970/AT1G29670/AT4G01130/AT3G16370/AT1G28670/AT1G09390/AT1G53580/AT1G33811
GO:0051287	MF	NAD binding	14	2.21967e-08	3.42601e-07	AT5G14200/AT5G14780/AT1G68010/AT2G19940/AT1G65930/AT3G04120/AT5G11670/AT3G25530/AT1G17650/AT5G63890/AT1G80560/AT1G13440/AT1G12900/AT1G79440
GO:0016614	MF	oxidoreductase activity, acting on CH-OH group of donors	12	1.27021e-07	1.30549e-06	AT1G26420/AT4G20840/AT4G20830/AT1G30720/AT4G20860/AT5G44390/AT2G34810/AT4G29740/AT5G44400/AT1G26390/AT5G44380/AT1G26380
GO:0004553	MF	hydrolase activity, hydrolyzing O-glycosyl compounds	16	3.25765e-06	3.73053e-05	AT5G57550/AT4G30270/AT5G58480/AT4G31140/AT5G58090/AT4G34480/AT3G19620/AT5G57560/AT5G11720/AT4G37800/AT5G65730/AT2G05790/AT2G06850/AT1G66250/AT1G11820/AT4G13080
GO:0043295	MF	glutathione binding	5	8.46691e-06	8.58786e-05	AT1G78380/AT4G02520/AT2G29450/AT5G27380/AT2G30870
GO:0008061	MF	chitin binding	7	1.65681e-05	0.000127713	AT3G12500/AT2G43570/AT3G54420/AT2G43590/AT4G19810/AT2G43620/AT3G04720
GO:0002020	MF	protease binding	5	3.41007e-05	0.000302644	AT4G16500/AT5G47550/AT5G02500/AT1G22530/AT1G72150
GO:0016671	MF	oxidoreductase activity, acting on a sulfur group of donors, disulfide as acceptor	8	4.2852e-05	0.000362202	AT1G50320/AT1G03680/AT3G15360/AT5G42980/AT4G03520/AT3G02730/AT1G76080/AT1G45145
GO:0004364	MF	glutathione transferase activity	9	6.66818e-05	0.000538001	AT1G78380/AT1G19570/AT4G02520/AT1G57720/AT5G02790/AT1G78370/AT1G09640/AT2G29450/AT2G30870
GO:0051920	MF	peroxiredoxin activity	4	8.16944e-05	0.000630468	AT3G11630/AT3G26060/AT3G52960/AT5G06290
GO:0020037	MF	heme binding	27	9.15209e-05	0.000682011	AT5G19890/AT5G05340/AT2G37130/AT1G77490/AT4G33420/AT3G49120/AT1G20620/AT5G06720/AT4G35090/AT4G11290/AT1G05260/AT4G37530/AT2G15620/AT1G14540/AT4G37520/AT2G18150/AT5G64120/AT1G22840/AT3G28200/AT2G22420/AT1G07890/AT5G04590/AT3G10520/AT4G08390/AT5G53560/AT5G64100/AT5G39580
GO:0004784	MF	superoxide dismutase activity	4	0.000133002	0.000890865	AT1G08830/AT2G28190/AT4G25100/AT3G10920
GO:0045330	MF	aspartyl esterase activity	9	0.000140704	0.000925	AT4G33220/AT5G09760/AT1G05310/AT3G10720/AT5G53370/AT2G45220/AT3G59010/AT3G49220/AT3G14310
GO:0008047	MF	enzyme activator activity	5	0.000178351	0.00117839	AT1G50320/AT1G03680/AT3G15360/AT4G03520/AT3G02730
GO:0051920	MF	peroxiredoxin activity	4	0.000339146	0.00252818	AT3G11630/AT3G26060/AT3G52960/AT5G06290
GO:0046910	MF	pectinesterase inhibitor activity	8	0.000600814	0.00338554	AT4G33220/AT5G09760/AT3G10720/AT5G53370/AT2G45220/AT3G59010/AT3G49220/AT3G14310
GO:0004784	MF	superoxide dismutase activity	4	0.000546368	0.00373352	AT1G08830/AT2G28190/AT4G25100/AT3G10920
GO:0004462	MF	lactoylglutathione lyase activity	3	0.000801606	0.00444641	AT1G67280/AT1G11840/AT1G08110
GO:0016594	MF	glycine binding	2	0.000856722	0.00453935	AT4G33010/AT2G26080
GO:0090353	MF	polygalacturonase inhibitor activity	2	0.000856722	0.00453935	AT5G06860/AT5G06870
GO:0030247	MF	polysaccharide binding	11	0.000806903	0.00481539	AT3G46550/AT5G58480/AT3G57240/AT4G31140/AT3G57260/AT5G58090/AT4G34480/AT2G05790/AT5G42100/AT1G66250/AT1G11820
GO:0009055	MF	electron transfer activity	14	0.000882617	0.00510263	AT4G27520/AT5G20230/AT5G15350/AT4G31840/AT2G44790/AT2G25060/AT5G40370/AT1G22840/AT4G12880/AT4G16760/AT3G45300/AT2G02850/AT2G20270/AT1G06290
GO:0010013	MF	N-1-naphthylphthalamic acid binding	2	0.00110644	0.0062028	AT4G33090/AT4G36760
GO:0046872	MF	metal ion binding	67	0.00158034	0.00813072	AT5G19890/AT5G05340/AT5G26000/AT2G37130/AT1G77490/AT4G33420/AT3G07390/AT1G67280/AT5G34850/AT3G49120/AT5G20230/AT3G48420/AT5G06720/AT3G54050/AT4G11290/AT1G05260/AT5G04140/AT3G55800/AT5G63310/AT1G11840/AT4G37530/AT2G15620/AT3G10920/AT1G14540/AT5G63180/AT1G08110/AT1G13750/AT5G22580/AT5G61410/AT1G13900/AT4G37520/AT3G10850/AT2G44790/AT5G11670/AT2G18150/AT3G60750/AT5G65620/AT5G64120/AT1G43670/AT3G28200…
GO:0008483	MF	transaminase activity	5	0.00164736	0.00835445	AT4G23600/AT1G11860/AT4G33680/AT3G48730/AT5G63570
GO:0030246	MF	carbohydrate binding	22	0.00165235	0.00903286	AT1G78830/AT3G15356/AT3G13750/AT3G26720/AT1G53070/AT3G47800/AT3G16470/AT2G28470/AT5G11720/AT3G16400/AT3G16530/AT1G78820/AT5G13980/AT4G25900/AT3G16460/AT1G78850/AT3G16420/AT5G66150/AT1G68560/AT1G09210/AT5G03350/AT1G31740
GO:0004130	MF	cytochrome-c peroxidase activity	3	0.00181372	0.00932052	AT1G77490/AT1G07890/AT4G08390
GO:0016688	MF	L-ascorbate peroxidase activity	3	0.00181372	0.00932052	AT1G77490/AT1G07890/AT4G08390
GO:0043395	MF	heparan sulfate proteoglycan binding	2	0.00252014	0.0121801	AT5G07830/AT5G34940
GO:0052890	MF	oxidoreductase activity, acting on the CH-CH group of donors, with a flavin as acceptor	3	0.00257327	0.0121801	AT4G16760/AT3G45300/AT1G06290
GO:0042277	MF	peptide binding	5	0.00287303	0.0139871	AT4G38740/AT3G62030/AT1G63770/AT4G33090/AT5G13120
GO:0043395	MF	heparan sulfate proteoglycan binding	2	0.00324591	0.0153972	AT5G07830/AT5G34940
GO:0004124	MF	cysteine synthase activity	3	0.00346168	0.0159597	AT3G61440/AT4G14880/AT2G43750
GO:0004362	MF	glutathione-disulfide reductase activity	2	0.00523258	0.0215468	AT3G54660/AT3G24170
GO:0000062	MF	fatty-acyl-CoA binding	3	0.0125204	0.0462994	AT4G16760/AT3G45300/AT1G06290
GO:0051539	MF	4 iron, 4 sulfur cluster binding	6	0.0126756	0.04639	AT2G05710/AT4G35830/AT2G15620/AT3G23940/AT5G04590/AT5G60600
GO:0008236	MF	serine-type peptidase activity	3	0.0147029	0.0532604	AT1G20160/AT2G47390/AT4G34980
GO:0004540	MF	ribonuclease activity	3	0.0148741	0.0573274	AT3G14290/AT2G02990/AT3G04720
GO:0000062	MF	fatty-acyl-CoA binding	3	0.0176227	0.0652039	AT4G16760/AT3G45300/AT1G06290
GO:0003746	MF	translation elongation factor activity	6	0.0188439	0.0655841	AT1G56070/AT1G62750/AT1G57720/AT1G09640/AT4G29060/AT4G20360
GO:0004096	MF	catalase activity	2	0.0207897	0.0686804	AT1G20620/AT4G35090
GO:0003959	MF	NADPH dehydrogenase activity	2	0.0269046	0.0781891	AT1G76680/AT2G06050
GO:0004019	MF	adenylosuccinate synthase activity	1	0.0292934	0.0781891	AT3G57610
GO:0004418	MF	hydroxymethylbilane synthase activity	1	0.0292934	0.0781891	AT5G08280
GO:0016002	MF	sulfite reductase activity	1	0.0292934	0.0781891	AT5G04590
GO:0016603	MF	glutaminyl-peptide cyclotransferase activity	1	0.0292934	0.0781891	AT4G25720
GO:0046863	MF	ribulose-1,5-bisphosphate carboxylase/oxygenase activator activity	1	0.0292934	0.0781891	AT2G39730
GO:0070001	MF	aspartic-type peptidase activity	1	0.0292934	0.0781891	AT3G18490
GO:0050661	MF	NADP binding	5	0.0329127	0.0859119	AT3G04120/AT3G54660/AT3G24170/AT1G13440/AT1G12900
GO:0019239	MF	deaminase activity	1	0.0332904	0.0892568	AT3G20390
GO:0003755	MF	peptidyl-prolyl cis-trans isomerase activity	5	0.0393202	0.0974986	AT5G45680/AT3G01480/AT4G38740/AT3G62030/AT5G13120
GO:0003995	MF	acyl-CoA dehydrogenase activity	2	0.0395487	0.0974986	AT4G16760/AT1G06290
GO:0045735	MF	nutrient reservoir activity	5	0.032768	0.0986247	AT5G20630/AT1G02335/AT3G62020/AT1G09560/AT1G72610
GO:0004121	MF	cystathionine beta-lyase activity	1	0.05773	0.121989	AT4G23600
GO:0004766	MF	spermidine synthase activity	1	0.05773	0.121989	AT1G23820
GO:0005244	MF	voltage-gated ion channel activity	1	0.05773	0.121989	AT1G19570
GO:0016836	MF	hydro-lyase activity	1	0.05773	0.121989	AT3G23940
GO:0042834	MF	peptidoglycan binding	1	0.05773	0.121989	AT1G21880
GO:0045157	MF	electron transporter, transferring electrons within the noncyclic electron transport pathway of photosynthesis activity	1	0.05773	0.121989	AT5G66190
GO:0046028	MF	electron transporter, transferring electrons from cytochrome b6/f complex of photosystem II activity	1	0.05773	0.121989	AT1G20340
GO:2001227	MF	quercitrin binding	1	0.05773	0.121989	AT4G02520
GO:0042803	MF	protein homodimerization activity	8	0.0636853	0.130684	AT1G35720/AT5G54770/AT4G23690/AT1G03475/AT3G48870/AT5G63860/AT2G04030/AT5G27380
GO:0003755	MF	peptidyl-prolyl cis-trans isomerase activity	5	0.0616284	0.144199	AT5G45680/AT3G01480/AT4G38740/AT3G62030/AT5G13120
GO:2001227	MF	quercitrin binding	1	0.0654743	0.144199	AT4G02520
GO:0030337	MF	DNA polymerase processivity factor activity	1	0.0654743	0.144199	AT1G07370
GO:2001147	MF	camalexin binding	1	0.0654743	0.144199	AT4G02520
GO:0004857	MF	enzyme inhibitor activity	5	0.0758325	0.159421	AT1G03680/AT3G15360/AT1G47960/AT3G02730/AT4G25260
GO:0004329	MF	formate-tetrahydrofolate ligase activity	1	0.085335	0.160285	AT1G50480
GO:0004801	MF	sedoheptulose-7-phosphate:D-glyceraldehyde-3-phosphate glyceronetransferase activity	1	0.085335	0.160285	AT5G13420
GO:0004802	MF	transketolase activity	1	0.085335	0.160285	AT3G60750
GO:0005078	MF	MAP-kinase scaffold activity	1	0.085335	0.160285	AT1G18080
GO:0008242	MF	omega peptidase activity	1	0.085335	0.160285	AT1G78680
GO:0010297	MF	heteropolysaccharide binding	1	0.085335	0.160285	AT1G09340
GO:0050017	MF	L-3-cyanoalanine synthase activity	1	0.085335	0.160285	AT3G61440
GO:0052691	MF	UDP-arabinopyranose mutase activity	1	0.085335	0.160285	AT3G02230
GO:0004888	MF	transmembrane signaling receptor activity	1	0.0965885	0.182462	AT4G02510
GO:0036524	MF	protein deglycase activity	1	0.0965885	0.182462	AT3G14990
GO:0005344	MF	oxygen carrier activity	1	0.0830285	0.18912	AT3G10520
GO:0030234	MF	enzyme regulator activity	2	0.08945	0.19824	AT3G16420/AT2G39730
GO:0019825	MF	oxygen binding	1	0.126668	0.225324	AT3G10520
GO:0016756	MF	glutathione gamma-glutamylcysteinyltransferase activity	1	0.138146	0.23465	AT4G39640
GO:0070402	MF	NADPH binding	1	0.138146	0.23465	AT5G62790
GO:0045174	MF	glutathione dehydrogenase (ascorbate) activity	1	0.121926	0.243853	AT1G19570
GO:0010181	MF	FMN binding	3	0.158486	0.264143	AT3G14420/AT1G76680/AT2G06050
GO:0016810	MF	hydrolase activity, acting on carbon-nitrogen (but not peptide) bonds	1	0.155748	0.266791	AT1G08980
GO:0042802	MF	identical protein binding	4	0.164001	0.27835	AT4G31990/AT3G48730/AT1G80600/AT5G63570
GO:0016884	MF	carbon-nitrogen ligase activity, with glutamine as amido-N-donor	1	0.187913	0.293873	AT1G08980
GO:0051538	MF	3 iron, 4 sulfur cluster binding	1	0.187913	0.293873	AT5G04140
GO:0005504	MF	fatty acid binding	1	0.183862	0.3037	AT5G48485
GO:0016616	MF	oxidoreductase activity, acting on the CH-OH group of donors, NAD or NADP as acceptor	1	0.21171	0.319817	AT5G14780
GO:0019199	MF	transmembrane receptor protein kinase activity	1	0.21171	0.319817	AT5G21090
GO:0016747	MF	transferase activity, transferring acyl groups other than amino-acyl groups	4	0.219552	0.330258	AT4G12910/AT2G22980/AT2G33530/AT1G28110
GO:0005496	MF	steroid binding	1	0.21104	0.333696	AT2G24940
GO:0016866	MF	intramolecular transferase activity	1	0.21104	0.333696	AT3G02230
GO:0008200	MF	ion channel inhibitor activity	1	0.23481	0.34163	AT2G43510
GO:0019139	MF	cytokinin dehydrogenase activity	1	0.23481	0.34163	AT4G29740
GO:0043023	MF	ribosomal large subunit binding	1	0.23481	0.34163	AT3G63190
GO:0045156	MF	electron transporter, transferring electrons within the cyclic electron transport pathway of photosynthesis activity	1	0.23481	0.34163	AT5G66190
GO:0031386	MF	protein tag	1	0.256512	0.384768	AT4G26840
GO:0003756	MF	protein disulfide isomerase activity	2	0.276178	0.422256	AT1G21750/AT1G77510
GO:0009881	MF	photoreceptor activity	1	0.287274	0.432078	AT5G63860
GO:0019899	MF	enzyme binding	1	0.287274	0.432078	AT1G78370
GO:0008233	MF	peptidase activity	5	0.330354	0.470119	AT2G38870/AT1G17860/AT1G47128/AT2G45180/AT4G30530
GO:0051087	MF	chaperone binding	1	0.377602	0.5099	AT5G20720
GO:0003779	MF	actin binding	1	0.414554	0.520024	AT1G20450
GO:0005096	MF	GTPase activator activity	3	0.416957	0.521196	AT2G44100/AT3G15730/AT3G59920
GO:0003824	MF	catalytic activity	3	0.407173	0.523509	AT1G09340/AT3G63140/AT5G12950
GO:0008327	MF	methyl-CpG binding	1	0.464556	0.562858	AT1G15340
GO:0016298	MF	lipase activity	2	0.481835	0.57593	AT1G53920/AT5G55050
GO:0008134	MF	transcription factor binding	1	0.456499	0.590575	AT3G12145
GO:0005528	MF	FK506 binding	1	0.510293	0.595901	AT5G45680
GO:0008234	MF	cysteine-type peptidase activity	1	0.510293	0.595901	AT1G47128
GO:0051082	MF	unfolded protein binding	1	0.47461	0.609743	AT5G20720
GO:0005199	MF	structural constituent of cell wall	2	0.411208	0.648443	AT4G13340/AT4G18670
GO:0005085	MF	guanyl-nucleotide exchange factor activity	1	0.430916	0.6667	AT5G63860
GO:0005528	MF	FK506 binding	1	0.55652	0.672917	AT5G45680
GO:0051015	MF	actin filament binding	1	0.55652	0.672917	AT3G57410
GO:0005544	MF	calcium-dependent phospholipid binding	1	0.602413	0.68986	AT1G35720
GO:0042349	MF	guiding stereospecific synthesis activity	1	0.585595	0.694456	AT4G23690
GO:0048038	MF	quinone binding	2	0.469424	0.712829	AT1G31690/AT3G43670
GO:0052689	MF	carboxylic ester hydrolase activity	1	0.677228	0.763225	AT2G41530
GO:0008289	MF	lipid binding	6	0.541511	0.784524	AT1G27950/AT2G38530/AT3G08770/AT1G22530/AT1G72150/AT2G38540
GO:0003713	MF	transcription coactivator activity	1	0.704821	0.786828	AT3G14990
GO:0004497	MF	monooxygenase activity	4	0.694938	0.798531	ATCG00490/AT5G38430/AT1G67090/AT5G38420
GO:0042393	MF	histone binding	1	0.724158	0.811935	AT4G26630
GO:0051537	MF	2 iron, 2 sulfur cluster binding	1	0.832447	0.898233	AT2G20270
GO:0043621	MF	protein self-association	1	0.828493	0.901596	AT5G48485
GO:0005516	MF	calmodulin binding	2	0.910027	0.967557	AT4G20260/AT2G38540
GO:0005215	MF	transporter activity	1	0.992005	0.992005	AT1G22530
GO:0016853	MF	isomerase activity	1	0.799394	1	AT4G25900
GO:0016829	MF	lyase activity	2	0.803636	1	AT5G41870/AT2G32090
GO:0016740	MF	transferase activity	5	0.860152	1	AT3G61440/AT4G14880/AT2G43750/AT2G30200/AT2G44050
GO:0003682	MF	chromatin binding	2	0.970584	1	AT5G63860/AT4G26630
GO:0016491	MF	oxidoreductase activity	5	0.992781	1	AT5G54770/AT2G44100/AT5G21105/AT4G09670/AT3G59920
GO:0016787	MF	hydrolase activity	6	0.999871	1	AT3G48420/AT3G20390/AT4G19410/AT5G16440/AT3G02780/AT3G23570
GO:0003735	MF	structural constituent of ribosome	3	1	1	ATCG00490/AT1G32990/AT3G27850
GO:0003743	MF	translation initiation factor activity	1	0.966586	1	AT3G13920
GO:0016301	MF	kinase activity	2	0.988078	1	AT5G03350/AT4G15530
GO:0043531	MF	ADP binding	1	0.997048	1	AT2G39730
GO:0000166	MF	nucleotide binding	3	0.999724	1	AT1G09750/AT2G35410/AT4G24770
GO:0000166	MF	nucleotide binding	3	0.999941	1	AT1G09750/AT2G35410/AT4G24770
GO:0003723	MF	RNA binding	4	0.999996	1	AT1G09340/AT2G02990/AT4G24770/AT3G51800
GO:0004674	MF	protein serine/threonine kinase activity	3	1	1	AT5G59680/AT2G01820/AT5G49760
GO:0003677	MF	DNA binding	9	1	1	AT3G18490/AT3G54400/AT1G09340/AT3G04120/AT2G36530/AT4G26630/AT5G04590/AT1G07370/AT1G13440
GO:0016757	MF	transferase activity, transferring glycosyl groups	1	0.999269	1	AT1G51630
GO:0003676	MF	nucleic acid binding	3	0.999832	1	AT2G35410/AT1G68290/AT1G11190
GO:0004672	MF	protein kinase activity	2	0.999977	1	AT1G51805/AT2G26730

## Sheet: CC
GOIDs	Ontology	Description	Counts	pvalue	p.adjust	IDs
GO:0048046	CC	apoplast	189	1.58552e-163	2.93321e-161	AT5G05340/AT5G20630/AT4G23600/AT1G78830/AT3G15356/AT3G54400/AT5G57550/AT5G26000/AT4G23170/AT4G30270/AT1G03680/AT3G01500/AT5G63800/AT4G25000/AT3G13750/AT5G56870/AT4G26140/AT3G57240/AT1G76160/AT3G05180/AT1G41830/AT1G78060/AT4G38970/AT1G09750/AT1G20020/AT2G43570/AT1G02335/AT5G64570/AT3G12780/AT5G49360/AT5G17920/AT2G21330/AT2G13360/AT5G66190/AT3G52840/AT4G27520/AT3G12580/AT1G11860/AT1G09340/AT4G20840…
GO:0005618	CC	cell wall	131	1.50748e-82	5.35154e-80	AT5G05340/AT5G20630/AT5G07830/AT1G78830/AT3G15356/AT3G54400/AT4G16500/AT5G57550/AT4G30270/AT5G45280/AT5G58480/AT1G33600/AT2G38870/AT5G63800/AT2G05710/AT3G15360/AT3G13750/AT5G56870/AT4G26140/AT3G57240/AT3G45970/AT1G76160/AT1G41830/AT1G78060/AT1G09750/AT1G02335/AT4G34180/AT5G64570/AT1G47960/AT3G12780/AT2G40610/AT3G52840/AT3G12580/AT3G54420/AT1G17860/AT5G42980/AT3G49120/AT4G33220/AT3G57260/AT1G20620…
GO:0009505	CC	plant-type cell wall	94	1.6981e-75	3.01414e-73	AT5G20630/AT5G07830/AT1G78830/AT3G54400/AT5G26000/AT2G37130/AT4G30270/AT5G23870/AT5G45280/AT1G33600/AT3G13750/AT3G45970/AT1G76160/AT1G41830/AT1G78060/AT1G09750/AT2G46930/AT2G43570/AT5G64570/AT5G10560/AT4G33420/AT5G49360/AT4G31140/AT3G62060/AT3G26720/AT1G21680/AT2G01820/AT5G34850/AT3G49120/AT4G20830/AT5G08370/AT1G53070/AT4G12420/AT5G34940/AT1G27950/AT5G44130/AT4G11290/AT1G05260/AT5G08380/AT5G21100…
GO:0005773	CC	vacuole	94	5.39024e-44	4.78384e-42	AT4G23600/AT4G16500/AT5G26000/AT1G15000/AT3G12500/AT5G63800/AT3G13750/AT5G56870/AT4G26140/AT3G57240/AT5G10560/AT1G47960/AT4G31140/AT3G52840/AT3G26720/AT4G27520/AT1G21680/AT1G09340/AT5G13690/AT5G42980/AT5G34850/AT3G49120/AT3G57260/AT4G20830/AT1G20620/AT5G20230/AT3G20390/AT2G28100/AT1G47128/AT3G16470/AT2G28470/AT1G19570/AT1G75040/AT5G43060/AT5G15350/AT5G11720/AT3G14210/AT1G04410/AT4G30920/AT1G74210…
GO:0005829	CC	cytosol	149	3.33477e-27	1.23387e-25	AT3G46970/AT5G05340/AT4G16500/AT2G37130/AT5G45280/AT2G05710/AT4G13930/AT3G12780/AT5G17920/AT3G12580/AT5G14740/AT5G42980/AT1G68010/AT5G36790/AT5G34850/AT4G20830/AT1G08830/AT5G59880/AT2G26740/AT1G53070/AT4G20860/AT4G03520/AT1G78380/AT4G14880/AT1G19570/AT3G63190/AT5G43060/AT5G51820/AT2G21170/AT4G30920/AT1G65930/AT3G08590/AT1G80600/AT4G37930/AT1G79550/AT2G24200/AT3G03250/AT1G23190/AT5G20010/AT3G04120…
GO:0009506	CC	plasmodesma	99	3.48305e-25	1.07394e-23	AT1G78830/AT4G16500/AT5G45280/AT3G13750/AT3G45970/AT1G76160/AT1G41830/AT1G78060/AT4G13930/AT1G02335/AT5G17920/AT4G31140/AT4G20260/AT1G09340/AT2G01820/AT5G42980/AT4G20830/AT5G59880/AT1G20620/AT5G58090/AT4G12420/AT5G09440/AT5G44130/AT1G47128/AT3G16470/AT3G14210/AT1G04410/AT1G30600/AT5G66920/AT1G65930/AT3G08590/AT1G79550/AT4G35830/AT1G03220/AT5G06860/AT3G03780/AT1G35720/AT4G13340/AT3G16460/AT1G22300…
GO:0010319	CC	stromule	24	4.76743e-25	1.95465e-23	AT1G03680/AT3G01500/AT3G12780/AT1G67280/AT1G09340/AT1G70730/AT4G35090/AT3G54050/AT5G51820/AT3G11630/AT3G63140/AT1G63940/AT4G37930/AT1G23740/AT1G23190/AT5G54770/AT5G61410/AT5G06290/AT1G55490/AT1G32060/AT5G04590/AT2G20890/AT2G39730/AT3G47520
GO:0005829	CC	cytosol	149	2.40228e-18	6.56623e-17	AT3G46970/AT5G05340/AT4G16500/AT2G37130/AT5G45280/AT2G05710/AT4G13930/AT3G12780/AT5G17920/AT3G12580/AT5G14740/AT5G42980/AT1G68010/AT5G36790/AT5G34850/AT4G20830/AT1G08830/AT5G59880/AT2G26740/AT1G53070/AT4G20860/AT4G03520/AT1G78380/AT4G14880/AT1G19570/AT3G63190/AT5G43060/AT5G51820/AT2G21170/AT4G30920/AT1G65930/AT3G08590/AT1G80600/AT4G37930/AT1G79550/AT2G24200/AT3G03250/AT1G23190/AT5G20010/AT3G04120…
GO:0046658	CC	anchored component of plasma membrane	33	1.05669e-17	4.16805e-16	AT3G46550/AT5G58480/AT3G57240/AT4G31140/AT4G20260/AT4G27520/AT3G57260/AT5G58090/AT5G20230/AT4G34480/AT5G55730/AT2G04780/AT4G12420/AT1G27950/AT5G44130/AT4G12730/AT5G15350/AT2G45470/AT1G03870/AT4G31840/AT1G21880/AT4G26690/AT2G44790/AT2G25060/AT2G05790/AT4G12880/AT5G19230/AT5G42100/AT2G02850/AT1G66250/AT5G67130/AT1G11820/AT5G55480
GO:0005739	CC	mitochondrion	81	3.0511e-13	7.73671e-12	AT5G14780/AT4G08870/AT2G05710/AT3G12780/AT3G12580/AT1G11860/AT5G42980/AT1G32470/AT1G17290/AT4G20830/AT3G61440/AT5G59880/AT1G20620/AT3G20390/AT4G35090/AT1G19570/AT1G48030/AT4G31990/AT2G21170/AT4G33010/AT1G53240/AT1G80600/AT1G63940/AT4G37930/AT3G19170/AT5G04140/AT3G04120/AT4G35830/AT2G26080/AT4G25100/AT1G35720/AT2G15620/AT1G22300/AT3G10920/AT5G54770/AT4G25130/AT3G55440/AT3G52930/AT2G43750/AT2G20420…
GO:0005576	CC	extracellular region	90	6.78748e-12	1.39143e-10	AT5G19890/AT5G41870/AT5G07830/AT4G16500/AT1G15000/AT5G23870/AT5G45280/AT5G58480/AT4G25000/AT3G45970/AT2G46930/AT4G33420/AT2G40610/AT3G48460/AT3G62060/AT4G11521/AT4G33220/AT5G09760/AT1G54790/AT4G34480/AT1G28600/AT5G06720/AT5G47550/AT4G19810/AT2G03980/AT5G34940/AT1G27950/AT1G05310/AT4G11290/AT1G05260/AT5G08260/AT5G21100/AT5G48540/AT1G30600/AT5G67360/AT1G74210/AT5G42240/AT4G37530/AT3G22060/AT5G06860…
GO:0031225	CC	anchored component of membrane	31	6.15528e-12	1.45675e-10	AT3G46550/AT5G58480/AT5G19240/AT4G31140/AT3G07390/AT4G27520/AT4G20830/AT1G66970/AT5G58090/AT5G20230/AT5G55730/AT2G04780/AT4G12420/AT1G27950/AT5G44130/AT4G12730/AT1G55260/AT5G15350/AT5G10770/AT2G45470/AT1G03870/AT4G31840/AT1G21880/AT4G26690/AT2G44790/AT2G25060/AT5G19230/AT5G42100/AT3G44100/AT1G66250/AT5G55480
GO:0005739	CC	mitochondrion	81	1.69832e-10	2.85627e-09	AT5G14780/AT4G08870/AT2G05710/AT3G12780/AT3G12580/AT1G11860/AT5G42980/AT1G32470/AT1G17290/AT4G20830/AT3G61440/AT5G59880/AT1G20620/AT3G20390/AT4G35090/AT1G19570/AT1G48030/AT4G31990/AT2G21170/AT4G33010/AT1G53240/AT1G80600/AT1G63940/AT4G37930/AT3G19170/AT5G04140/AT3G04120/AT4G35830/AT2G26080/AT4G25100/AT1G35720/AT2G15620/AT1G22300/AT3G10920/AT5G54770/AT4G25130/AT3G55440/AT3G52930/AT2G43750/AT2G20420…
GO:0005774	CC	vacuolar membrane	41	2.47777e-09	4.88671e-08	AT2G05710/AT5G10560/AT5G17920/AT3G26720/AT3G12580/AT1G21680/AT3G49120/AT4G12420/AT1G78380/AT4G12730/AT4G14880/AT1G04410/AT5G13980/AT1G79550/AT3G04120/AT1G35720/AT1G78850/AT3G02230/AT3G55440/AT3G52930/AT1G56070/AT3G16640/AT5G11670/AT5G02240/AT5G02500/AT1G22840/AT1G78300/AT3G51260/AT3G14067/AT5G42020/AT2G27020/AT5G50850/AT4G29260/AT5G07440/AT5G35590/AT3G14990/AT1G77510/AT3G22630/AT5G53560/AT2G04030…
GO:0019773	CC	proteasome core complex, alpha-subunit complex	8	2.77961e-09	5.19348e-08	AT1G79210/AT3G14290/AT3G51260/AT2G27020/AT5G42790/AT3G22110/AT5G35590/AT2G05840
GO:0022626	CC	cytosolic ribosome	23	9.26414e-09	1.4949e-07	AT5G26000/AT2G21330/AT1G11860/AT1G20620/AT4G35090/AT1G67090/AT3G14210/AT5G38420/AT4G37930/AT3G14420/AT3G02230/AT5G25980/AT5G35630/AT2G28000/AT5G02500/AT3G14290/AT3G51260/AT1G55490/AT3G22110/AT1G32990/AT3G18080/AT1G18080/AT2G05840
GO:0005886	CC	plasma membrane	132	2.6683e-08	3.52596e-07	AT3G46550/AT1G78830/AT4G30270/AT5G45280/AT5G58480/AT3G01500/AT4G13930/AT5G19240/AT5G17920/AT4G31140/AT4G20260/AT2G13360/AT3G07390/AT4G27520/AT3G12580/AT2G01820/AT4G20840/AT5G42980/AT4G20830/AT1G66970/AT5G59880/AT1G20620/AT5G58090/AT5G20230/AT4G18760/AT5G55730/AT2G04780/AT4G12420/AT1G27950/AT1G78380/AT5G44130/AT4G12730/AT4G14880/AT1G19570/AT5G15350/AT1G04410/AT5G10770/AT1G65930/AT2G45470/AT4G37930…
GO:0009534	CC	chloroplast thylakoid	22	2.44063e-08	3.6101e-07	AT1G20020/AT1G77490/AT2G21330/AT5G66190/AT1G11860/AT2G44920/AT3G01480/AT3G63140/AT4G33010/AT4G37930/AT3G02730/AT1G06680/AT1G29670/AT4G21280/AT5G13120/AT1G55480/AT2G38540/AT2G01140/AT2G20890/AT2G22230/AT1G20340/AT4G20360
GO:0031977	CC	thylakoid lumen	12	4.96117e-08	5.73636e-07	AT5G45680/AT3G55330/AT2G21330/AT5G66190/AT1G67280/AT2G44920/AT1G67090/AT3G01480/AT1G06680/AT4G21280/AT5G13120/AT1G20340
GO:0019773	CC	proteasome core complex, alpha-subunit complex	8	4.85781e-08	6.639e-07	AT1G79210/AT3G14290/AT3G51260/AT2G27020/AT5G42790/AT3G22110/AT5G35590/AT2G05840
GO:0022626	CC	cytosolic ribosome	23	9.29616e-08	1.01164e-06	AT5G26000/AT2G21330/AT1G11860/AT1G20620/AT4G35090/AT1G67090/AT3G14210/AT5G38420/AT4G37930/AT3G14420/AT3G02230/AT5G25980/AT5G35630/AT2G28000/AT5G02500/AT3G14290/AT3G51260/AT1G55490/AT3G22110/AT1G32990/AT3G18080/AT1G18080/AT2G05840
GO:0005777	CC	peroxisome	23	8.71283e-08	1.23722e-06	AT5G26000/AT5G17920/AT2G13360/AT1G09340/AT1G68010/AT1G20620/AT4G35090/AT4G14880/AT1G19570/AT3G14210/AT1G23310/AT4G12910/AT3G14420/AT5G25980/AT3G01910/AT3G24170/AT2G31670/AT4G16760/AT5G48230/AT1G13440/AT1G06290/AT2G06050/AT3G16910
GO:0016020	CC	membrane	79	2.60769e-07	3.05472e-06	AT1G33600/AT3G01500/AT3G45970/AT1G41830/AT4G38970/AT4G13930/AT3G12780/AT5G17920/AT2G40610/AT2G13360/AT1G11860/AT1G09340/AT5G42980/AT1G20620/AT5G38430/AT2G19940/AT2G04780/AT4G12420/AT5G09440/AT1G67090/AT4G12730/AT3G16470/AT4G14880/AT3G14210/AT1G04410/AT2G46760/AT5G38420/AT4G37930/AT1G23310/AT5G04140/AT1G79550/AT3G04120/AT1G03220/AT5G06860/AT1G35720/AT3G16460/AT2G15620/AT3G14420/AT1G56070/AT4G02520…
GO:0031977	CC	thylakoid lumen	12	6.42214e-07	6.58269e-06	AT5G45680/AT3G55330/AT2G21330/AT5G66190/AT1G67280/AT2G44920/AT1G67090/AT3G01480/AT1G06680/AT4G21280/AT5G13120/AT1G20340
GO:0009536	CC	plastid	24	1.8582e-06	2.44319e-05	AT5G14200/AT5G09650/AT3G20390/AT4G23100/AT3G23940/AT3G52960/AT2G43750/AT3G58610/AT3G60750/AT3G57610/AT4G11010/AT3G48870/AT4G02510/AT5G13420/AT5G04590/AT5G16440/AT4G24620/AT5G16390/AT2G01140/AT1G80560/AT5G20720/AT2G04030/AT4G20360/AT3G47520
GO:0005759	CC	mitochondrial matrix	14	2.32916e-06	2.75617e-05	AT1G48030/AT1G53240/AT4G37930/AT3G19170/AT5G04140/AT3G10920/AT5G65620/AT5G50850/AT1G59900/AT2G44350/AT3G45300/AT5G20720/AT4G29060/AT1G79440
GO:0005960	CC	glycine cleavage complex	4	3.56139e-06	3.83119e-05	AT1G32470/AT4G33010/AT2G26080/AT2G35370
GO:0005960	CC	glycine cleavage complex	4	5.92037e-06	5.21557e-05	AT1G32470/AT4G33010/AT2G26080/AT2G35370
GO:0009536	CC	plastid	24	1.55629e-05	0.000126482	AT5G14200/AT5G09650/AT3G20390/AT4G23100/AT3G23940/AT3G52960/AT2G43750/AT3G58610/AT3G60750/AT3G57610/AT4G11010/AT3G48870/AT4G02510/AT5G13420/AT5G04590/AT5G16440/AT4G24620/AT5G16390/AT2G01140/AT1G80560/AT5G20720/AT2G04030/AT4G20360/AT3G47520
GO:0009543	CC	chloroplast thylakoid lumen	8	4.2852e-05	0.000362202	AT5G45680/AT3G55330/AT2G44920/AT3G01480/AT5G53490/AT3G26060/AT1G06680/AT4G11010
GO:0005740	CC	mitochondrial envelope	4	0.000133002	0.000890865	AT3G04120/AT3G52930/AT2G36530/AT1G13900
GO:0009532	CC	plastid stroma	5	0.000175381	0.00111179	AT5G49910/AT3G48870/AT2G20890/AT4G12060/AT3G47520
GO:0000502	CC	proteasome complex	11	0.00013858	0.00113636	AT1G79210/AT3G14290/AT3G51260/AT3G60820/AT2G27020/AT5G42790/AT3G22110/AT5G35590/AT3G27430/AT3G22630/AT2G05840
GO:0005794	CC	Golgi apparatus	40	0.000219752	0.00136863	AT5G05340/AT1G78830/AT4G30270/AT2G34070/AT3G45970/AT1G29050/AT3G14850/AT4G34180/AT4G35220/AT3G12580/AT5G42980/AT3G49120/AT5G06720/AT1G27950/AT5G44130/AT1G47128/AT5G57560/AT5G20010/AT1G03220/AT5G06860/AT1G78850/AT3G02230/AT2G43750/AT2G38530/AT1G13900/AT5G64260/AT3G16640/AT2G05920/AT5G02500/AT1G78300/AT1G22530/AT1G72150/AT1G07890/AT5G38480/AT2G14740/AT1G77510/AT1G51630/AT3G21160/AT1G66180/AT5G39580
GO:0009532	CC	plastid stroma	5	0.000951213	0.00557139	AT5G49910/AT3G48870/AT2G20890/AT4G12060/AT3G47520
GO:0005839	CC	proteasome core complex	4	0.00123815	0.00673699	AT4G31300/AT3G60820/AT3G27430/AT3G22630
GO:0005794	CC	Golgi apparatus	40	0.00244286	0.0122143	AT5G05340/AT1G78830/AT4G30270/AT2G34070/AT3G45970/AT1G29050/AT3G14850/AT4G34180/AT4G35220/AT3G12580/AT5G42980/AT3G49120/AT5G06720/AT1G27950/AT5G44130/AT1G47128/AT5G57560/AT5G20010/AT1G03220/AT5G06860/AT1G78850/AT3G02230/AT2G43750/AT2G38530/AT1G13900/AT5G64260/AT3G16640/AT2G05920/AT5G02500/AT1G78300/AT1G22530/AT1G72150/AT1G07890/AT5G38480/AT2G14740/AT1G77510/AT1G51630/AT3G21160/AT1G66180/AT5G39580
GO:0005839	CC	proteasome core complex	4	0.00299902	0.0144659	AT4G31300/AT3G60820/AT3G27430/AT3G22630
GO:0005615	CC	extracellular space	11	0.00390004	0.0175977	AT5G09440/AT1G47128/AT5G43060/AT5G60360/AT4G29740/AT5G64260/AT1G20850/AT1G78680/AT4G01610/AT4G35350/AT4G30610
GO:0010287	CC	plastoglobule	7	0.00635331	0.0281928	AT4G38970/AT2G21330/AT1G09340/AT3G63140/AT3G26060/AT2G01140/AT2G39730
GO:0031012	CC	extracellular matrix	3	0.0206344	0.0686804	AT5G20630/AT1G72610/AT2G02850
GO:0005615	CC	extracellular space	11	0.0210184	0.0749353	AT5G09440/AT1G47128/AT5G43060/AT5G60360/AT4G29740/AT5G64260/AT1G20850/AT1G78680/AT4G01610/AT4G35350/AT4G30610
GO:0000325	CC	plant-type vacuole	4	0.0224174	0.0759457	AT1G12240/AT1G62660/AT5G23820/AT4G35350
GO:0005788	CC	endoplasmic reticulum lumen	4	0.0289767	0.0781891	AT5G42020/AT1G21750/AT1G09210/AT1G77510
GO:0005835	CC	fatty acid synthase complex	1	0.0292934	0.0781891	AT2G05990
GO:0009349	CC	riboflavin synthase complex	1	0.0292934	0.0781891	AT2G44050
GO:0009516	CC	leucoplast	1	0.0292934	0.0781891	AT1G74920
GO:0030931	CC	heterotetrameric ADPG pyrophosphorylase complex	1	0.0292934	0.0781891	AT5G48300
GO:0009654	CC	photosystem II oxygen evolving complex	3	0.0320525	0.0842862	AT3G55330/AT1G06680/AT4G21280
GO:0005835	CC	fatty acid synthase complex	1	0.0332904	0.0892568	AT2G05990
GO:0030931	CC	heterotetrameric ADPG pyrophosphorylase complex	1	0.0332904	0.0892568	AT5G48300
GO:0005881	CC	cytoplasmic microtubule	1	0.0332904	0.0892568	AT4G20260
GO:0009575	CC	chromoplast stroma	1	0.0332904	0.0892568	AT1G55480
GO:0071944	CC	cell periphery	7	0.0345854	0.109077	AT4G33220/AT5G09760/AT3G10720/AT5G53370/AT2G45220/AT3G59010/AT3G49220
GO:0010287	CC	plastoglobule	7	0.0392421	0.112186	AT4G38970/AT2G21330/AT1G09340/AT3G63140/AT3G26060/AT2G01140/AT2G39730
GO:0005835	CC	fatty acid synthase complex	1	0.0424116	0.112186	AT2G05990
GO:0031012	CC	extracellular matrix	3	0.0384855	0.112186	AT5G20630/AT1G72610/AT2G02850
GO:0009654	CC	photosystem II oxygen evolving complex	3	0.0442149	0.115208	AT3G55330/AT1G06680/AT4G21280
GO:0043626	CC	PCNA complex	1	0.0654743	0.144199	AT1G07370
GO:0000015	CC	phosphopyruvate hydratase complex	1	0.085335	0.160285	AT2G36530
GO:0000015	CC	phosphopyruvate hydratase complex	1	0.0965885	0.182462	AT2G36530
GO:0009509	CC	chromoplast	1	0.112132	0.198045	AT2G43750
GO:0009897	CC	external side of plasma membrane	1	0.112132	0.198045	AT3G46550
GO:0005938	CC	cell cortex	2	0.119271	0.218466	AT4G29350/AT2G19760
GO:0009897	CC	external side of plasma membrane	1	0.126668	0.225324	AT3G46550
GO:0000427	CC	plastid-encoded plastid RNA polymerase complex	1	0.138146	0.23465	AT1G09340
GO:0009533	CC	chloroplast stromal thylakoid	1	0.138146	0.23465	AT5G13120
GO:0000311	CC	plastid large ribosomal subunit	1	0.163399	0.266085	AT3G27850
GO:0055035	CC	plastid thylakoid membrane	1	0.163399	0.266085	AT1G20340
GO:0009317	CC	acetyl-CoA carboxylase complex	1	0.155748	0.266791	AT5G16390
GO:0019898	CC	extrinsic component of membrane	3	0.196839	0.317391	AT3G55330/AT1G06680/AT4G21280
GO:0010168	CC	ER body	1	0.23481	0.34163	AT5G23820
GO:0005795	CC	Golgi stack	1	0.300135	0.414584	AT3G02230
GO:0042644	CC	chloroplast nucleoid	1	0.300135	0.414584	AT5G04590
GO:0009501	CC	amyloplast	1	0.320649	0.434467	AT4G31990
GO:0031090	CC	organelle membrane	1	0.320649	0.434467	AT4G33090
GO:0000148	CC	1,3-beta-D-glucan synthase complex	1	0.359892	0.469712	AT1G05570
GO:0031090	CC	organelle membrane	1	0.356152	0.491703	AT4G33090
GO:0019898	CC	extrinsic component of membrane	3	0.309653	0.507831	AT3G55330/AT1G06680/AT4G21280
GO:0090406	CC	pollen tube	2	0.412494	0.520024	AT3G03250/AT3G16640
GO:0010494	CC	cytoplasmic stress granule	1	0.431719	0.537755	AT1G47128
GO:0015935	CC	small ribosomal subunit	1	0.448381	0.554618	ATCG00490
GO:0005783	CC	endoplasmic reticulum	20	0.470664	0.568283	AT3G18490/AT3G57240/AT4G34180/AT4G35220/AT3G57260/AT1G27950/AT1G05260/AT5G43060/AT4G02520/AT5G42020/AT4G33090/AT3G15730/AT1G21750/AT1G09210/AT5G42100/AT5G48485/AT1G77510/AT5G53560/AT3G21160/AT1G26380
GO:0005819	CC	spindle	2	0.472235	0.568283	AT2G19760/AT3G51260
GO:0005762	CC	mitochondrial large ribosomal subunit	1	0.541228	0.671995	AT1G32990
GO:0070469	CC	respirasome	1	0.571304	0.686307	AT1G22840
GO:0031966	CC	mitochondrial membrane	2	0.619819	0.70751	AT5G51970/AT3G15730
GO:0009504	CC	cell plate	1	0.612767	0.722051	AT1G05570
GO:0005730	CC	nucleolus	10	0.712587	0.791522	AT2G19940/AT3G52930/AT1G56070/AT5G02500/AT2G19760/AT5G42020/AT5G50850/AT1G07370/AT1G13440/AT4G20360
GO:0005783	CC	endoplasmic reticulum	20	0.69976	0.799109	AT3G18490/AT3G57240/AT4G34180/AT4G35220/AT3G57260/AT1G27950/AT1G05260/AT5G43060/AT4G02520/AT5G42020/AT4G33090/AT3G15730/AT1G21750/AT1G09210/AT5G42100/AT5G48485/AT1G77510/AT5G53560/AT3G21160/AT1G26380
GO:0000932	CC	P-body	1	0.753142	0.830327	AT1G47128
GO:0005747	CC	mitochondrial respiratory chain complex I	1	0.787318	0.862647	AT1G48030
GO:0005802	CC	trans-Golgi network	6	0.791921	0.865021	AT2G43750/AT2G38530/AT1G13900/AT2G14740/AT1G51630/AT3G21160
GO:0009524	CC	phragmoplast	2	0.795903	0.872194	AT2G19760/AT3G51260
GO:0016592	CC	mediator complex	1	0.796761	0.872194	AT5G42020
GO:0005768	CC	endosome	6	0.808958	0.878226	AT2G43750/AT2G38530/AT1G13900/AT2G14740/AT1G51630/AT3G21160
GO:0005856	CC	cytoskeleton	1	0.855657	0.912187	AT2G41740
GO:0070469	CC	respirasome	1	0.662015	0.920088	AT1G22840
GO:0009295	CC	nucleoid	1	0.690145	0.943199	AT4G20360
GO:0009504	CC	cell plate	1	0.703322	0.94545	AT1G05570
GO:0005768	CC	endosome	6	0.891496	0.955375	AT2G43750/AT2G38530/AT1G13900/AT2G14740/AT1G51630/AT3G21160
GO:0080008	CC	Cul4-RING E3 ubiquitin ligase complex	1	0.91564	0.967418	AT3G18060
GO:0005622	CC	intracellular	6	0.97127	0.992005	AT3G15356/AT2G43570/AT3G54420/AT2G43590/AT2G43620/AT3G04720
GO:0009524	CC	phragmoplast	2	0.892972	1	AT2G19760/AT3G51260
GO:0016592	CC	mediator complex	1	0.870182	1	AT5G42020
GO:0000785	CC	chromatin	1	0.91961	1	AT5G63860
GO:0012505	CC	endomembrane system	1	0.988242	1	AT2G24940
GO:0005737	CC	cytoplasm	48	0.999998	1	AT5G19890/AT4G30270/AT4G39970/AT3G12780/AT1G78380/AT5G63310/AT1G23190/AT4G25100/AT5G43940/AT2G35635/AT5G55160/AT4G26840/AT2G36530/AT4G37520/AT1G63770/AT5G37780/AT5G51970/AT5G40370/AT4G29350/AT5G02500/AT1G43670/AT2G24270/AT2G19760/AT4G31300/AT1G12310/AT1G57720/AT1G20450/AT5G38480/AT3G14310/AT1G07370/AT2G06850/AT1G78370/AT1G76680/AT3G27430/AT3G57410/AT5G56030/AT4G37000/AT3G48990/AT1G08980/AT1G09640…
GO:0005840	CC	ribosome	2	0.965968	1	AT1G09340/AT3G63140
GO:0043231	CC	intracellular membrane-bounded organelle	2	0.970745	1	AT4G02520/AT1G09010
GO:0043231	CC	intracellular membrane-bounded organelle	2	0.98458	1	AT4G02520/AT1G09010
GO:0000139	CC	Golgi membrane	2	0.999709	1	AT2G14740/AT3G21160
GO:0005789	CC	endoplasmic reticulum membrane	3	0.999757	1	AT5G45680/AT4G25720/AT5G53560
GO:0005634	CC	nucleus	69	1	1	AT5G19890/AT5G20630/AT3G12780/AT3G12580/AT1G08830/AT1G29660/AT3G16470/AT4G14880/AT1G55260/AT3G14210/AT1G04410/AT3G16530/AT4G37930/AT1G79550/AT5G63310/AT1G23190/AT5G20010/AT3G04120/AT3G16460/AT2G35635/AT3G14420/AT1G79210/AT3G16420/AT5G55160/AT4G26840/AT5G10450/AT2G36530/AT3G16640/AT2G35370/AT5G02500/AT1G43670/AT2G19760/AT4G31300/AT3G14290/AT3G51260/AT3G60820/AT5G42020/AT2G27020/AT3G15730/AT5G42790…
GO:0016021	CC	integral component of membrane	28	1	1	AT5G59680/AT2G34070/AT1G51805/AT2G37720/AT3G45970/AT1G29050/AT1G77490/AT3G14850/AT2G01820/AT4G18760/AT5G44390/AT4G31840/AT4G25720/AT5G53370/AT1G22530/AT1G72150/AT4G24040/AT4G02510/AT3G49220/AT2G26730/AT2G14740/AT5G49760/AT1G51630/AT2G20890/AT5G53560/AT2G33330/AT3G21160/AT1G05570
GO:0016021	CC	integral component of membrane	28	1	1	AT5G59680/AT2G34070/AT1G51805/AT2G37720/AT3G45970/AT1G29050/AT1G77490/AT3G14850/AT2G01820/AT4G18760/AT5G44390/AT4G31840/AT4G25720/AT5G53370/AT1G22530/AT1G72150/AT4G24040/AT4G02510/AT3G49220/AT2G26730/AT2G14740/AT5G49760/AT1G51630/AT2G20890/AT5G53560/AT2G33330/AT3G21160/AT1G05570
