# Supplementary material for: Analysis of the apoplast fluid proteome during the induction of systemic acquired resistance in Arabidopsis thaliana
Source: PeerJ. 2023 Oct 20;11:e16324. doi: 10.7717/peerj.16324 (PMC10592298; doi:10.7717/peerj.16324)
Supplement: Supplemental Information 6 [file peerj-11-16324-s006.xlsx]

## Sheet: Sheet1
Protein IDs	Gene Name	Description	LFQ intensity in CK1	LFQ intensity in CK2	LFQ intensity in CK3	LFQ intensity in Pst1	LFQ intensity in Pst2	LFQ intensity in Pst3	CK average	Pst average	Pst/CK	Pvalue	Sign
AT5G19890	PER59	peroxidase 59	19134000	23646000	24496000	105800000	105220000	123290000	2.24253e+07	1.11437e+08	4.96923	0.000133173	Up
AT3G46970	PHS2	alpha-glucan phosphorylase 2	16856000	11816000	16594000	28978000	44651000	51610000	1.50887e+07	4.17463e+07	2.76673	0.018011	Up
AT3G18490	ASPG1	aspartic protease in guard cell 1	673910000	537330000	634180000	1596000000	1560900000	1601100000	615140000	1586000000	2.57827	2.17202e-05	Up
AT1G50320	THX	thioredoxin X	14710000	10320000	9134700	25382000	23383000	19988000	1.13882e+07	2.29177e+07	2.0124	0.00758342	Up
AT5G59680	/	leucine-rich repeat protein kinase family protein	50253000	42495000	54864000	96309000	95923000	97287000	49204000	9.65063e+07	1.96135	0.000200532	Up
AT5G05340	PRX52	peroxidase 52	284850000	301080000	299840000	554140000	551630000	624470000	2.95257e+08	5.76747e+08	1.95337	0.000324261	Up
AT5G41870	PGF15	polygalacturonase clade F 15 (Glycoside hydrolase family 28)	45848000	64676000	55270000	116170000	104160000	97690000	5.52647e+07	1.06007e+08	1.91816	0.00270878	Up
AT5G07830	GUS2	glucuronidase 2 （glycoside hydrolase family 79）	738770000	705370000	803380000	1362600000	1390400000	1437600000	7.49173e+08	1.39687e+09	1.86454	5.70294e-05	Up
AT4G23600	JR2	jasmonic acid responsive 2	93958000	90230000	95104000	173740000	173630000	170310000	9.30973e+07	172560000	1.85354	1.76559e-06	Up
AT3G46550	FLA4	fasciclin-like arabinogalactan-protein 4	248520000	245310000	267860000	452720000	461120000	487010000	2.53897e+08	466950000	1.83913	6.93457e-05	Up
AT5G14200	IMD1	isopropylmalate dehydrogenase 1	42010000	30365000	40999000	69925000	73613000	58939000	3.77913e+07	6.74923e+07	1.78592	0.00675734	Up
AT5G45680	FKBP13	FK506-binding protein 13	111730000	141200000	127110000	234390000	233560000	203440000	126680000	2.23797e+08	1.76663	0.00185425	Up
AT5G57550	XTH25	xyloglucan endotransglucosylase/hydrolase 25 (Glycoside hydrolase family 16)	52475000	71682000	49854000	97425000	101590000	102670000	5.80037e+07	1.00562e+08	1.73371	0.00382514	Up
AT2G37130	PER21	peroxidase 21	50112000	42885000	53651000	88480000	83534000	80613000	4.88827e+07	84209000	1.72268	0.000833475	Up
AT5G14780	FDH	formate dehydrogenase	31709000	34126000	34432000	60885000	56435000	53588000	3.34223e+07	5.69693e+07	1.70453	0.000505635	Up
AT4G23170	CRK9	cysteine-rich receptor-like kinase 9	2074700000	1678700000	1910600000	3415900000	3132900000	3016600000	1888000000	3.18847e+09	1.68881	0.00140394	Up
AT4G30270	XTH24	xyloglucan endotransglucosylase/hydrolase 24	7743400000	7572900000	7715300000	12371000000	12371000000	13418000000	7677200000	12720000000	1.65685	0.000139429	Up
AT1G15000	scpl50	serine carboxypeptidase-like 50	57823000	46345000	47281000	76983000	93245000	79843000	50483000	83357000	1.65119	0.00614222	Up
AT5G23870	PAE9	pectin acetylesterase 9	136260000	101790000	133630000	208380000	178960000	216540000	1.23893e+08	2.01293e+08	1.62473	0.00824055	Up
AT1G03680	TRX-M1	thioredoxin M-type 1	339600000	354600000	349430000	565620000	564570000	553070000	3.47877e+08	5.61087e+08	1.61289	3.64257e-06	Up
AT3G12500	PR3	pathogenesis-related 3	32745000	31764000	36734000	60957000	51798000	50332000	3.37477e+07	5.43623e+07	1.61085	0.00486611	Up
AT5G58480	/	O-Glycosyl hydrolases family 17 protein (Glycoside hydrolase family 17)	55607000	53395000	61216000	93569000	87580000	90540000	5.67393e+07	90563000	1.59612	0.000308724	Up
AT1G21350	/	thioredoxin superfamily protein	51256000	42973000	51437000	84909000	71671000	74160000	4.85553e+07	7.69133e+07	1.58403	0.00452503	Up
AT4G29680	/	alkaline-phosphatase-like family protein	228140000	212820000	219530000	344870000	384110000	312550000	2.20163e+08	3.47177e+08	1.57691	0.00387624	Up
AT2G38870	PR6-like	PR-6 proteinase inhibitor family	121920000	95746000	103800000	152460000	165850000	185950000	1.07155e+08	1.68087e+08	1.56863	0.00804323	Up
AT2G34070	TBL37	trichome birefringence-like 37	162770000	157700000	154370000	262160000	243910000	236840000	158280000	2.47637e+08	1.56455	0.000353145	Up
AT4G08870	ARGAH2	arginine amidohydrolase 2	96477000	94224000	96862000	161120000	148930000	138650000	9.58543e+07	1.49567e+08	1.56035	0.00120225	Up
AT1G51805	SIF3	stress induced factor 3	60119000	57262000	72802000	101010000	98960000	94755000	6.33943e+07	9.82417e+07	1.54969	0.00243176	Up
AT5G63800	BGAL6	beta-galactosidase 6 (Glycoside hydrolase family 35)	2139200000	2214500000	2279000000	3512500000	3302600000	3420500000	2210900000	3.41187e+09	1.5432	7.97216e-05	Up
AT4G25000	AMY1	alpha-amylase-like	138410000	138600000	125690000	211310000	191930000	215520000	1.34233e+08	2.06253e+08	1.53653	0.00102902	Up
AT3G15360	TRX-M4	thioredoxin M-type 4	581160000	744770000	611750000	878480000	1018000000	1068600000	6.45893e+08	988360000	1.53022	0.0107008	Up
AT3G13750	BGAL1	beta galactosidase 1 (Glycoside hydrolase family 35)	782200000	761830000	787810000	1195300000	1139600000	1230400000	777280000	1.18843e+09	1.52896	0.00011807	Up
AT2G37720	TBL15	trichome birefringence-like 15	54960000	57176000	57710000	81284000	84051000	93240000	5.66153e+07	8.61917e+07	1.52241	0.00134209	Up
AT5G56870	BGAL4	beta-galactosidase 4 (Glycoside hydrolase family 35)	2109900000	2120800000	2135500000	2992700000	3170100000	3510600000	2.12207e+09	3.22447e+09	1.51949	0.00192535	Up
AT3G55330	PPL1	PsbP-like protein 1	207810000	254700000	229540000	331030000	384640000	332680000	2.30683e+08	349450000	1.51485	0.00589739	Up
AT4G26140	BGAL12	beta-galactosidase 12 (Glycoside hydrolase family 35)	409520000	335280000	468820000	591430000	603840000	640310000	404540000	611860000	1.51248	0.0073997	Up
AT3G57240	BG3	beta-1,3-glucanase 3 (Glycoside hydrolase family 17)	300700000	248610000	315220000	398010000	442380000	462830000	2.88177e+08	4.34407e+08	1.50743	0.00628517	Up
AT3G26380	APSE	arapase (Glycoside hydrolase family 27)	389690000	340580000	364080000	544060000	553670000	548380000	3.64783e+08	5.48703e+08	1.50419	0.000219558	Up
AT1G76160	sks5	SKU5 similar 5	6332900000	6875500000	6373600000	9589900000	9902500000	9962100000	6.52733e+09	9.81817e+09	1.50416	9.5407e-05	Up
AT2G19760	PRF1	profilin 1	130240000	158620000	153740000	105220000	89684000	99189000	1.47533e+08	98031000	0.664467	0.00737982	down
AT3G05900	/	neurofilament protein-like protein	158810000	185760000	152140000	112420000	108780000	108290000	165570000	109830000	0.663345	0.00576589	down
AT2G05790	/	O-Glycosyl hydrolases family 17 protein (Glycoside hydrolase family 17)	51943000	42914000	45123000	34438000	31038000	26137000	46660000	3.05377e+07	0.654472	0.0113394	down
AT5G25460	DGR2	DUF642 L-gall responsive gene 2	3744500000	3746600000	3551900000	2485700000	2411900000	2326100000	3681000000	2407900000	0.654143	8.8178e-05	down
AT1G49750	/	Leucine-rich repeat (LRR) family protein	1548700000	1786300000	1616300000	1066000000	1108100000	1036900000	1.65043e+09	1.07033e+09	0.648517	0.00140388	down
AT4G23670	/	polyketide cyclase/dehydrase and lipid transport superfamily protein	227100000	230590000	202770000	140810000	125830000	160060000	2.20153e+08	1.42233e+08	0.646065	0.00414136	down
AT1G68560	XYL1	alpha-xylosidase 1	680940000	705660000	658460000	433450000	441940000	439280000	6.81687e+08	4.38223e+08	0.642852	6.16666e-05	down
AT1G55490	CPN60B	chaperonin-60beta1	134930000	124240000	126880000	86578000	79022000	81579000	1.28683e+08	82393000	0.640277	0.000290352	down
AT1G22530	PATL2	patellin 2	84845000	94930000	82780000	56661000	61558000	49464000	8.75183e+07	5.58943e+07	0.638659	0.00354172	down
AT4G29260	VSP3	vegetative storage protein 3	37327000	39498000	28082000	23574000	19158000	24006000	34969000	22246000	0.636163	0.0292668	down
AT5G23820	ML3	MD2-related lipid recognition 3	250940000	290010000	247540000	162930000	176790000	159770000	262830000	1.66497e+08	0.633477	0.00272899	down
AT3G28200	/	peroxidase superfamily protein	265230000	272380000	258630000	168830000	157190000	171080000	2.65413e+08	165700000	0.624309	6.97536e-05	down
AT2G34790	AtBBE-like 15	berberine bridge enzyme-Like 15	838590000	842690000	823020000	524390000	499670000	530500000	8.34767e+08	5.18187e+08	0.620756	9.21568e-06	down
AT1G72150	PATL1	patellin 1	196800000	241500000	223050000	134140000	144520000	128000000	220450000	1.35553e+08	0.614894	0.00357611	down
AT1G13930	/	nodulin-related protein 2	64821000	49868000	43890000	29618000	30890000	36343000	5.28597e+07	3.22837e+07	0.610743	0.0349223	down
AT4G09320	NDK1	nucleoside diphosphate kinase 1	228340000	254820000	211380000	136600000	134400000	152640000	2.31513e+08	1.41213e+08	0.609958	0.002885	down
AT2G37660	/	NAD(P)-binding Rossmann-fold superfamily protein	34098000	35211000	33603000	18478000	18045000	26242000	34304000	2.09217e+07	0.60989	0.00777858	down
AT1G12310	/	calcium-binding EF-hand family protein	49606000	52119000	53198000	27684000	32551000	33663000	51641000	3.12993e+07	0.606095	0.000661829	down
AT1G53920	GLIP5	GDSL-motif lipase 5	18541000	20706000	17291000	10740000	11323000	11895000	18846000	1.13193e+07	0.600623	0.00201811	down
AT4G12880	ENODL19	early nodulin-like protein 19	478830000	552570000	573310000	311070000	323230000	325250000	5.34903e+08	319850000	0.597959	0.00176669	down
AT3G56310	AGAL3	alpha-galactosidase 3（Glycoside Hydrolase Family 27）	43863000	52930000	52221000	28014000	34786000	26212000	4.96713e+07	2.96707e+07	0.59734	0.00690904	down
AT1G07890	MEE6	maternal effect embryo arrest 6	44198000	50178000	50531000	32183000	32108000	21851000	4.83023e+07	28714000	0.594464	0.0080586	down
AT1G32060	PRK	phosphoribulokinase	233820000	194850000	228580000	123110000	124200000	131240000	2.19083e+08	1.26183e+08	0.57596	0.00173618	down
AT4G01130	/	GDSL-motif lipase	197980000	157790000	163760000	105770000	101170000	90398000	1.73177e+08	9.91127e+07	0.572321	0.00512729	down
AT1G65590	HEXO3	beta-hexosaminidase 3	241350000	256590000	233290000	128180000	144830000	145350000	2.43743e+08	1.39453e+08	0.572132	0.00029782	down
AT1G20190	EXPA11	expansin 11	214210000	267030000	241780000	122300000	118820000	168650000	2.41007e+08	136590000	0.566748	0.00921167	down
AT4G39330	CAD9	cinnamyl alcohol dehydrogenase 9	49976000	51200000	55578000	26705000	27314000	34662000	5.22513e+07	2.95603e+07	0.565734	0.00178829	down
AT4G19410	PAE7	pectin acetylesterase 7	4821300000	5578100000	5030700000	2989500000	2770500000	2905500000	5.14337e+09	2888500000	0.561597	0.000653533	down
AT2G38010	AtNCER2	neutral ceramidase 2	100950000	101470000	90381000	56806000	46590000	57931000	9.76003e+07	5.37757e+07	0.550978	0.00101187	down
AT4G23820	PGF13	pectin lyase-like superfamily protein	254320000	269120000	253060000	132380000	140210000	141170000	2.58833e+08	137920000	0.532853	3.25823e-05	down
AT2G14900	GASA7	gibberellin-regulated family protein	876670000	1023900000	886210000	447270000	573110000	461360000	9.28927e+08	4.93913e+08	0.531703	0.00217638	down
AT1G20450	LTI45	low temperature induced 45	68822000	85245000	80235000	38197000	40436000	45121000	7.81007e+07	4.12513e+07	0.528182	0.00220173	down
AT1G09310	SVB2	ABA responsive trichome formation regulator	282500000	280750000	222940000	127200000	144140000	140680000	2.62063e+08	137340000	0.524072	0.00351948	down
AT1G03230	SAP1	secreted aspartic protease 1	120070000	107490000	127160000	61848000	61177000	62036000	118240000	61687000	0.52171	0.00060229	down
AT5G03350	SAI-LLP1	SA-induced legume lectin-like protein 1	2373000000	2113800000	2838100000	1251800000	1338200000	1194600000	2.44163e+09	1.26153e+09	0.516676	0.00545394	down
AT5G20950	BGLC1	glycosyl hydrolase family protein	101590000	128020000	121680000	54036000	68879000	57978000	1.17097e+08	6.02977e+07	0.514939	0.00338473	down
AT5G62360	PMEI13	pectin methyl-esterase inhibitor 13	189700000	129070000	139330000	73857000	79427000	73696000	152700000	75660000	0.495481	0.0149589	down
AT3G16370	GGL19	GDSL-motif lipase	661780000	585210000	606510000	313060000	303830000	300130000	6.17833e+08	3.05673e+08	0.49475	0.000174696	down
AT1G20440	COR47	cold-regulated 47	425290000	478990000	458270000	235070000	222950000	215050000	4.54183e+08	2.24357e+08	0.493978	0.000160957	down
AT1G72610	GER1	germin-like protein 1	1817800000	2422300000	2008500000	988080000	1006600000	1071500000	2.08287e+09	1022060000	0.490699	0.00416317	down
AT2G02990	RNS1	ribonuclease 1	224230000	223260000	204830000	107730000	103550000	105490000	217440000	105590000	0.485605	6.39441e-05	down
AT3G13790	CWI1	cell wall invertase 1	269620000	262240000	266430000	142190000	119040000	120350000	2.66097e+08	1.27193e+08	0.477997	5.86054e-05	down
AT4G34980	SLP2	subtilisin-like serine protease 2	29972000	30396000	30122000	15922000	13660000	13384000	3.01633e+07	14322000	0.474815	4.1e-05	down
AT4G24780	PLL19	probable pectate lyase 18	63990000	95659000	70320000	33483000	34739000	40750000	7.66563e+07	36324000	0.473855	0.0153376	down
AT3G14310	PME3	pectin methylesterase 3	151120000	177580000	149840000	73621000	83211000	61988000	1.59513e+08	72940000	0.457266	0.00137331	down
AT4G39640	GGT1	gamma-glutamyl transpeptidase 1	492940000	527750000	484860000	232430000	228210000	217710000	501850000	2.26117e+08	0.450566	3.77436e-05	down
AT5G06870	PGIP2	polygalacturonase inhibiting protein 2	192780000	201840000	173810000	83339000	90589000	74134000	1.89477e+08	8.26873e+07	0.436399	0.000361551	down
AT5G44400	AtBBE26	FAD-binding berberine family protein	183720000	192320000	166710000	79591000	76069000	74948000	1.80917e+08	7.68693e+07	0.424888	0.000169504	down
AT2G44260	/	DUF946 family protein	57764000	58138000	56016000	22729000	24724000	23866000	57306000	23773000	0.414843	2.73941e-06	down
AT1G76180	ERD14	early response to dehydration 14	231720000	271870000	239030000	99435000	109570000	97820000	247540000	102275000	0.413166	0.000352443	down
AT2G06850	XTH4	xyloglucan endotransglucosylase/hydrolase 4	560830000	602060000	544720000	233430000	212650000	200920000	5.69203e+08	2.15667e+08	0.378892	5.48839e-05	down
AT2G38540	LTP1	lipid transfer protein 1	22690000000	32531000000	25981000000	9216000000	9029300000	9515200000	2.70673e+10	9253500000	0.34187	0.0035424	down
AT2G33530	scpl46	serine carboxypeptidase-like 46	69520000	81522000	84092000	21420000	24323000	24605000	78378000	2.34493e+07	0.299183	0.000282916	down
AT4G21650	SBT3.13	subtilase 3.13	287430000	276460000	281790000	79945000	81442000	76485000	2.81893e+08	7.92907e+07	0.281279	5.27737e-07	down
AT5G55050	/	GDSL-motif lipase	83383000	82917000	82553000	16883000	19363000	30619000	82951000	2.22883e+07	0.268693	0.000137779	down
AT5G14920	GASA14	A-stimulated in Arabidopsis 14	2838500000	3040300000	2490700000	642930000	633410000	741590000	2.78983e+09	6.72643e+08	0.241105	0.000208606	down
AT5G12940	/	leucine-rich repeat (LRR) family protein	204960000	216690000	180800000	36993000	42722000	40984000	2.00817e+08	40233000	0.200347	0.000114888	down
AT2G45180	DRN1	disease related nonspecific lipid transfer protein 1	466190000	232710000	471850000	69436000	75214000	66727000	390250000	70459000	0.180548	0.0153881	down
AT5G07030	/	eukaryotic aspartyl protease family protein	122330000	154120000	115110000	21907000	24190000	21819000	130520000	2.26387e+07	0.17345	0.000849513	down
AT2G10940	/	lipid-transfer protein	3918900000	3239500000	3436900000	432720000	464050000	345520000	3.53177e+09	4.14097e+08	0.117249	0.000108734	down
AT1G10960	FD1	ferredoxin 1				108350000	120660000	98780000		1.09263e+08			Unique in Pst
AT5G40150	/	peroxidase superfamily protein				81397000	96774000	72825000		8.36653e+07			Unique in Pst
AT4G15100	scpl30	serine carboxypeptidase-like 30				52478000	56056000	52369000		5.36343e+07			Unique in Pst
AT4G36360	BGAL3	beta-galactosidase 3 (Glycoside hydrolase family 35)				56661000	54465000	58838000		5.66547e+07			Unique in Pst
AT3G19710	BCAT4	branched-chain aminotransferase 4				26328000	27796000	23705000		25943000			Unique in Pst
AT1G31180	IMDH3	isopropylmalate dehydrogenase 3				21154000	23903000	18191000		2.10827e+07			Unique in Pst
AT4G20430	/	subtilase family protein				17969000	20933000	18090000		1.89973e+07			Unique in Pst
AT2G23610	MES3	methyl esterase 3				13965000	20358000	15750000		16691000			Unique in Pst
AT3G61490	PGF9	Polygalacturonase Clade F 9				16186000	15332000	13400000		1.49727e+07			Unique in Pst
AT2G33150	PKT3	peroxisomal 3-ketoacyl-CoA thiolase 3				11402000	10705000	15636000		12581000			Unique in Pst
AT3G23450	KRATOS	kratos restricts cell death during differentiation of tracheary elements	715290000	864150000	747680000				7.75707e+08				Unique in CK
AT1G33811	GGL7	GDSL-motif lipase	277670000	270010000	265000000				2.70893e+08				Unique in CK
AT1G05570	CALS1	callose synthase 1	131900000	152520000	137960000				1.40793e+08				Unique in CK
AT2G41740	VLN2	villin 2	59342000	62560000	56348000				5.94167e+07				Unique in CK
AT5G55480	GDPDL4	glycerophosphodiester phosphodiesterase (GDPD) like 4	62692000	65741000	55471000				6.13013e+07				Unique in CK
AT1G66180	/	putative aspartyl protease	41732000	40417000	34458000				38869000				Unique in CK
AT2G24280	/	alpha/beta-hydrolases superfamily protein	30352000	34925000	28062000				31113000				Unique in CK
AT1G74000	SS3	strictosidine synthase 3	22970000	31519000	24669000				26386000				Unique in CK
