# Supplementary material for: Analysis of the apoplast fluid proteome during the induction of systemic acquired resistance in Arabidopsis thaliana
Source: PeerJ. 2023 Oct 20;11:e16324. doi: 10.7717/peerj.16324 (PMC10592298; doi:10.7717/peerj.16324)
Supplement: Supplemental Information 7 [file peerj-11-16324-s007.xlsx]

## Sheet: BP
GOIDs	Ontology	Description	Counts	Levels	pvalue	p.adjust	IDs
GO:0005975	BP	carbohydrate metabolic process	14	4	1.07911e-08	2.58986e-07	AT5G41870/AT5G58480/AT5G63800/AT4G25000/AT3G13750/AT5G56870/AT4G26140/AT3G57240/AT2G05790/AT3G56310/AT1G65590/AT4G23820/AT3G13790/AT4G36360
GO:0071555	BP	cell wall organization	11	4	5.18056e-07	9.32501e-06	AT5G41870/AT5G57550/AT5G23870/AT5G58480/AT1G68560/AT3G56310/AT4G19410/AT4G23820/AT2G06850/AT2G38540/AT1G05570
GO:0042744	BP	hydrogen peroxide catabolic process	6	5	4.23232e-06	9.73433e-05	AT5G19890/AT5G05340/AT2G37130/AT3G28200/AT1G07890/AT5G40150
GO:0043085	BP	positive regulation of catalytic activity	3	5	3.22058e-05	0.000617277	AT1G50320/AT1G03680/AT3G15360
GO:0009611	BP	response to wounding	6	4	0.000256909	0.00205527	AT4G23600/AT2G38870/AT2G02990/AT3G13790/AT3G19710/AT2G33150
GO:0034599	BP	cellular response to oxidative stress	4	5	0.000142338	0.00216499	AT1G50320/AT1G03680/AT3G15360/AT1G07890
GO:0043086	BP	negative regulation of catalytic activity	2	5	0.000203806	0.00260418	AT1G03680/AT3G15360
GO:0006109	BP	regulation of carbohydrate metabolic process	2	5	0.0003048	0.00318655	AT1G03680/AT3G15360
GO:0006662	BP	glycerol ether metabolic process	3	5	0.000862738	0.00724122	AT1G50320/AT1G03680/AT3G15360
GO:0009737	BP	response to abscisic acid	7	5	0.00100079	0.00724122	AT3G18490/AT4G23600/AT4G25000/AT1G20450/AT1G20440/AT1G76180/AT5G14920
GO:0016042	BP	lipid catabolic process	5	5	0.0010353	0.00724122	AT1G53920/AT4G01130/AT3G16370/AT5G55050/AT1G33811
GO:0009735	BP	response to cytokinin	5	5	0.00109139	0.00724122	AT3G15360/AT1G13930/AT1G07890/AT1G32060/AT4G39330
GO:0009631	BP	cold acclimation	3	5	0.00113341	0.00724122	AT1G20450/AT1G20440/AT1G76180
GO:0000103	BP	sulfate assimilation	3	5	0.00153999	0.00892586	AT1G50320/AT1G03680/AT3G15360
GO:0009409	BP	response to cold	6	5	0.00191493	0.0100099	AT1G03680/AT1G55490/AT1G32060/AT1G20450/AT1G20440/AT1G76180
GO:0048354	BP	mucilage biosynthetic process involved in seed coat development	2	4	0.00193456	0.0131374	AT3G46550/AT5G63800
GO:0006979	BP	response to oxidative stress	6	4	0.00253943	0.0140646	AT5G19890/AT5G05340/AT2G37130/AT3G28200/AT4G39640/AT5G40150
GO:0009826	BP	unidimensional cell growth	3	5	0.00386786	0.0193393	AT5G07830/AT2G19760/AT2G06850
GO:0006560	BP	proline metabolic process	1	5	0.00909724	0.0337478	AT4G08870
GO:0009081	BP	branched-chain amino acid metabolic process	1	5	0.00909724	0.0337478	AT3G19710
GO:0009820	BP	alkaloid metabolic process	1	5	0.00909724	0.0337478	AT1G74000
GO:0010442	BP	guard cell morphogenesis	1	5	0.00909724	0.0337478	AT5G55480
GO:0009651	BP	response to salt stress	6	5	0.0146159	0.0494362	AT3G46550/AT5G14200/AT1G13930/AT1G07890/AT1G31180/AT5G14920
GO:0042989	BP	sequestering of actin monomers	1	5	0.0225898	0.0666109	AT2G19760
GO:0009414	BP	response to water deprivation	4	5	0.0238631	0.0686063	AT3G46970/AT3G18490/AT1G20450/AT1G20440
GO:0000050	BP	urea cycle	1	5	0.0270468	0.0723344	AT4G08870
GO:0010188	BP	response to microbial phytotoxin	1	5	0.0270468	0.0723344	AT4G23600
GO:0042546	BP	cell wall biogenesis	2	5	0.0288133	0.0753074	AT4G30270/AT2G06850
GO:0006665	BP	sphingolipid metabolic process	1	5	0.0314837	0.0787092	AT2G38010
GO:0051085	BP	chaperone cofactor-dependent protein refolding	1	5	0.0314837	0.0787092	AT1G55490
GO:0080167	BP	response to karrikin	3	4	0.0245119	0.0932571	AT5G25460/AT3G13790/AT1G10960
GO:0045454	BP	cell redox homeostasis	3	5	0.0415722	0.0975673	AT1G50320/AT1G03680/AT3G15360
GO:0009414	BP	response to water deprivation	4	4	0.0339615	0.110684	AT3G46970/AT3G18490/AT1G20450/AT1G20440
GO:0042546	BP	cell wall biogenesis	2	4	0.0353574	0.110684	AT4G30270/AT2G06850
GO:0071669	BP	plant-type cell wall organization or biogenesis	1	4	0.0351645	0.110684	AT4G30270
GO:0009612	BP	response to mechanical stimulus	1	4	0.0400871	0.111011	AT2G06850
GO:0010192	BP	mucilage biosynthetic process	1	5	0.0533696	0.12275	AT3G46550
GO:0009739	BP	response to gibberellin	2	5	0.0551565	0.123448	AT4G25000/AT5G14920
GO:0010015	BP	root morphogenesis	1	5	0.0576877	0.123448	AT5G25460
GO:0050832	BP	defense response to fungus	5	5	0.0579668	0.123448	AT2G37130/AT3G12500/AT2G38870/AT4G08870/AT1G20440
GO:0009664	BP	plant-type cell wall organization	2	5	0.0611539	0.127293	AT2G37130/AT1G20190
GO:0009269	BP	response to desiccation	1	5	0.0619863	0.127293	AT1G76180
GO:0042026	BP	protein refolding	1	4	0.049858	0.128206	AT1G55490
GO:0045454	BP	cell redox homeostasis	3	4	0.0546336	0.135642	AT1G50320/AT1G03680/AT3G15360
GO:0006040	BP	amino sugar metabolic process	1	5	0.0705255	0.137465	AT3G12500
GO:2000377	BP	regulation of reactive oxygen species metabolic process	1	5	0.0705255	0.137465	AT5G14920
GO:0016998	BP	cell wall macromolecule catabolic process	1	5	0.0747661	0.13763	AT3G12500
GO:0022900	BP	electron transport chain	1	5	0.0747661	0.13763	AT1G10960
GO:0009718	BP	anthocyanin-containing compound biosynthetic process	1	5	0.0789877	0.13763	AT2G02990
GO:0010026	BP	trichome differentiation	1	5	0.0789877	0.13763	AT5G55480
GO:0010229	BP	inflorescence development	1	5	0.0789877	0.13763	AT2G19760
GO:0030163	BP	protein catabolic process	2	5	0.0803679	0.137945	AT3G18490/AT1G66180
GO:0019253	BP	reductive pentose-phosphate cycle	1	5	0.0873737	0.147764	AT1G32060
GO:0009416	BP	response to light stimulus	2	5	0.102604	0.165983	AT3G19710/AT1G66180
GO:0009825	BP	multidimensional cell growth	1	4	0.0785842	0.176815	AT3G46550
GO:0012501	BP	programmed cell death	1	4	0.0785842	0.176815	AT4G23170
GO:0009058	BP	biosynthetic process	2	3	0.0496753	0.178167	AT4G23600/AT1G74000
GO:0007155	BP	cell adhesion	1	3	0.0527903	0.178167	AT3G46550
GO:0022900	BP	electron transport chain	1	4	0.0832877	0.178447	AT1G10960
GO:0010197	BP	polar nucleus fusion	1	5	0.120169	0.189307	AT2G34790
GO:0009832	BP	plant-type cell wall biogenesis	1	5	0.124185	0.192991	AT5G57550
GO:0000302	BP	response to reactive oxygen species	1	5	0.132164	0.194857	AT1G07890
GO:0006520	BP	cellular amino acid metabolic process	1	5	0.132164	0.194857	AT4G23600
GO:0009789	BP	positive regulation of abscisic acid-activated signaling pathway	1	5	0.132164	0.194857	AT2G33150
GO:0010286	BP	heat acclimation	1	5	0.140071	0.2039	AT1G20440
GO:0055114	BP	oxidation-reduction process	3	3	0.0807102	0.217917	AT1G50320/AT1G03680/AT3G15360
GO:0006520	BP	cellular amino acid metabolic process	1	4	0.146696	0.234714	AT4G23600
GO:0061077	BP	chaperone-mediated protein folding	1	4	0.146696	0.234714	AT5G45680
GO:0048511	BP	rhythmic process	1	2	0.0786613	0.235984	AT2G37130
GO:0010029	BP	regulation of seed germination	1	4	0.151056	0.236435	AT1G20450
GO:0006457	BP	protein folding	3	3	0.124754	0.259105	AT1G50320/AT1G03680/AT3G15360
GO:0008219	BP	cell death	1	3	0.144477	0.270482	AT1G55490
GO:0019748	BP	secondary metabolic process	1	3	0.150268	0.270482	AT2G33530
GO:0008360	BP	regulation of cell shape	1	4	0.176754	0.270771	AT1G05570
GO:0007049	BP	cell cycle	2	3	0.194318	0.308622	AT1G22530/AT1G72150
GO:0071554	BP	cell wall organization or biogenesis	1	3	0.21148	0.31722	AT2G34070
GO:0009626	BP	plant-type hypersensitive response	1	5	0.270799	0.353885	AT3G12500
GO:0042545	BP	cell wall modification	1	5	0.287326	0.371264	AT3G14310
GO:0009620	BP	response to fungus	1	4	0.294146	0.392194	AT3G14310
GO:0009624	BP	response to nematode	1	4	0.294146	0.392194	AT3G14310
GO:0042742	BP	defense response to bacterium	2	5	0.322603	0.403254	AT2G37660/AT1G32060
GO:0009793	BP	embryo development ending in seed dormancy	2	5	0.329289	0.407185	AT2G34790/AT1G07890
GO:0006869	BP	lipid transport	1	5	0.334717	0.409494	AT2G38540
GO:0009860	BP	pollen tube growth	1	5	0.358703	0.429696	AT1G72150
GO:0009617	BP	response to bacterium	1	4	0.332904	0.435802	AT3G57240
GO:0009793	BP	embryo development ending in seed dormancy	2	4	0.379851	0.479812	AT2G34790/AT1G07890
GO:0009860	BP	pollen tube growth	1	4	0.391837	0.486418	AT1G72150
GO:0006970	BP	response to osmotic stress	1	4	0.422321	0.506785	AT1G20440
GO:0006508	BP	proteolysis	1	5	0.44127	0.523155	AT1G66180
GO:0051301	BP	cell division	2	3	0.42585	0.52647	AT1G22530/AT1G72150
GO:0015979	BP	photosynthesis	1	4	0.454109	0.530607	AT3G55330
GO:0009408	BP	response to heat	1	5	0.458968	0.538585	AT1G07890
GO:0009751	BP	response to salicylic acid	1	5	0.480911	0.558634	AT4G23170
GO:0009753	BP	response to jasmonic acid	1	5	0.490378	0.563935	AT4G23600
GO:0009408	BP	response to heat	1	4	0.497282	0.568323	AT1G07890
GO:0006629	BP	lipid metabolic process	1	4	0.544182	0.612205	AT5G55480
GO:0006810	BP	transport	1	4	0.590996	0.654641	AT1G72150
GO:0009733	BP	response to auxin	1	5	0.665063	0.714787	AT2G06850
GO:0006952	BP	defense response	2	4	0.674954	0.725323	AT5G58480/AT5G23820
GO:0031640	BP	killing of cells of other organism	1	4	0.776907	0.822607	AT3G12500

## Sheet: MF
GOIDs	Ontology	Description	Counts	Levels	pvalue	p.adjust	IDs
GO:0008047	MF	enzyme activator activity	3	4	8.28603e-05	0.000852278	AT1G50320/AT1G03680/AT3G15360
GO:0004601	MF	peroxidase activity	5	5	0.000279691	0.00318655	AT5G19890/AT5G05340/AT2G37130/AT3G28200/AT5G40150
GO:0004553	MF	hydrolase activity, hydrolyzing O-glycosyl compounds	5	5	0.000439565	0.0042125	AT5G57550/AT4G30270/AT5G58480/AT2G05790/AT2G06850
GO:0016671	MF	oxidoreductase activity, acting on a sulfur group of donors, disulfide as acceptor	3	5	0.00113341	0.00724122	AT1G50320/AT1G03680/AT3G15360
GO:0002020	MF	protease binding	2	5	0.00180568	0.00988823	AT1G22530/AT1G72150
GO:0004601	MF	peroxidase activity	5	3	0.0015742	0.0121094	AT5G19890/AT5G05340/AT2G37130/AT3G28200/AT5G40150
GO:0030247	MF	polysaccharide binding	4	4	0.00211587	0.0131374	AT3G46550/AT5G58480/AT3G57240/AT2G05790
GO:0016788	MF	hydrolase activity, acting on ester bonds	4	4	0.00218957	0.0131374	AT4G01130/AT3G16370/AT2G23610/AT1G33811
GO:0051287	MF	NAD binding	3	5	0.00453174	0.0209709	AT5G14200/AT5G14780/AT1G31180
GO:0070001	MF	aspartic-type peptidase activity	1	5	0.0045589	0.0209709	AT3G18490
GO:0004121	MF	cystathionine beta-lyase activity	1	5	0.00909724	0.0337478	AT4G23600
GO:0090353	MF	polygalacturonase inhibitor activity	1	5	0.00909724	0.0337478	AT5G06870
GO:0020037	MF	heme binding	6	5	0.0114365	0.0410998	AT5G19890/AT5G05340/AT2G37130/AT3G28200/AT1G07890/AT5G40150
GO:0043395	MF	heparan sulfate proteoglycan binding	1	5	0.0136151	0.0474466	AT5G07830
GO:0030170	MF	pyridoxal phosphate binding	3	5	0.019547	0.0607543	AT3G46970/AT4G23600/AT3G19710
GO:0016756	MF	glutathione gamma-glutamylcysteinyltransferase activity	1	5	0.0225898	0.0666109	AT4G39640
GO:0043395	MF	heparan sulfate proteoglycan binding	1	4	0.0152231	0.0685038	AT5G07830
GO:0016298	MF	lipase activity	2	5	0.0261129	0.0723344	AT1G53920/AT5G55050
GO:0016616	MF	oxidoreductase activity, acting on the CH-OH group of donors, NAD or NADP as acceptor	1	5	0.0359005	0.0878418	AT5G14780
GO:0004130	MF	cytochrome-c peroxidase activity	1	4	0.0400871	0.111011	AT1G07890
GO:0016688	MF	L-ascorbate peroxidase activity	1	4	0.0400871	0.111011	AT1G07890
GO:0004857	MF	enzyme inhibitor activity	2	4	0.0471663	0.125777	AT1G03680/AT3G15360
GO:0003779	MF	actin binding	1	5	0.0789877	0.13763	AT1G20450
GO:0008236	MF	serine-type peptidase activity	1	5	0.0789877	0.13763	AT4G34980
GO:0005528	MF	FK506 binding	1	5	0.10392	0.165983	AT5G45680
GO:0004540	MF	ribonuclease activity	1	4	0.0785842	0.176815	AT2G02990
GO:0008483	MF	transaminase activity	1	5	0.128184	0.194857	AT4G23600
GO:0008289	MF	lipid binding	3	3	0.0674971	0.202491	AT1G22530/AT1G72150/AT2G38540
GO:0050660	MF	flavin adenine dinucleotide binding	2	5	0.146398	0.210447	AT2G34790/AT5G44400
GO:0005528	MF	FK506 binding	1	4	0.115554	0.21333	AT5G45680
GO:0008233	MF	peptidase activity	2	4	0.115023	0.21333	AT2G38870/AT2G45180
GO:0008061	MF	chitin binding	1	4	0.124564	0.218636	AT3G12500
GO:0030246	MF	carbohydrate binding	4	3	0.0995756	0.244413	AT3G13750/AT1G68560/AT5G03350/AT4G36360
GO:0016722	MF	oxidoreductase activity, oxidizing metal ions	1	4	0.193457	0.286002	AT1G76160
GO:0009055	MF	electron transfer activity	2	4	0.194641	0.286002	AT4G12880/AT1G10960
GO:0045735	MF	nutrient reservoir activity	1	2	0.192956	0.289434	AT1G72610
GO:0051537	MF	2 iron, 2 sulfur cluster binding	1	5	0.240089	0.332653	AT1G10960
GO:0016614	MF	oxidoreductase activity, acting on CH-OH group of donors	1	4	0.237681	0.33555	AT5G44400
GO:0003755	MF	peptidyl-prolyl cis-trans isomerase activity	1	5	0.253892	0.34407	AT5G45680
GO:0046910	MF	pectinesterase inhibitor activity	1	5	0.257304	0.34407	AT3G14310
GO:0045330	MF	aspartyl esterase activity	1	5	0.264082	0.349074	AT3G14310
GO:0046872	MF	metal ion binding	9	5	0.29748	0.380113	AT5G19890/AT5G05340/AT2G37130/AT3G28200/AT4G09320/AT1G07890/AT4G24780/AT1G10960/AT5G40150
GO:0003755	MF	peptidyl-prolyl cis-trans isomerase activity	1	4	0.279506	0.387008	AT5G45680
GO:0016747	MF	transferase activity, transferring acyl groups other than amino-acyl groups	1	5	0.313002	0.395552	AT2G33530
GO:0005215	MF	transporter activity	1	2	0.410757	0.410757	AT1G22530
GO:0016829	MF	lyase activity	1	3	0.378754	0.511317	AT5G41870
GO:0005516	MF	calmodulin binding	1	4	0.456912	0.530607	AT2G38540
GO:0016301	MF	kinase activity	1	5	0.629228	0.689155	AT5G03350
GO:0004672	MF	protein kinase activity	1	4	0.867537	0.892323	AT1G51805
GO:0016491	MF	oxidoreductase activity	1	3	0.851993	0.934008	AT1G10960
GO:0016787	MF	hydrolase activity	1	3	0.95226	0.965917	AT4G19410
GO:0003723	MF	RNA binding	1	5	0.953131	0.987478	AT2G02990
GO:0004674	MF	protein serine/threonine kinase activity	1	5	0.971889	0.997922	AT5G59680
GO:0003677	MF	DNA binding	1	5	0.999705	1	AT3G18490

## Sheet: CC
GOIDs	Ontology	Description	Counts	Levels	pvalue	p.adjust	IDs
GO:0048046	CC	apoplast	31	4	8.60057e-27	6.19241e-25	AT5G05340/AT4G23600/AT5G57550/AT4G23170/AT4G30270/AT1G03680/AT5G63800/AT4G25000/AT3G13750/AT5G56870/AT4G26140/AT3G57240/AT1G76160/AT2G19760/AT1G68560/AT1G55490/AT1G72150/AT2G37660/AT4G12880/AT3G56310/P25697/AT4G39330/AT5G03350/AT3G16370/AT1G72610/AT3G13790/AT3G14310/AT4G39640/AT2G06850/AT4G36360/AT2G38540
GO:0005618	CC	cell wall	31	5	9.81238e-26	1.12842e-23	AT5G05340/AT5G07830/AT5G57550/AT4G30270/AT5G58480/AT2G38870/AT5G63800/AT3G15360/AT3G13750/AT5G56870/AT4G26140/AT3G57240/AT1G76160/AT2G19760/AT1G68560/AT2G34790/AT1G07890/AT1G65590/AT1G20190/AT4G19410/AT5G03350/AT2G02990/AT3G13790/AT4G34980/AT3G14310/AT5G06870/AT5G44400/AT2G06850/AT4G36360/AT4G20430/AT1G74000
GO:0009505	CC	plant-type cell wall	19	5	1.33071e-17	7.65161e-16	AT5G07830/AT2G37130/AT4G30270/AT5G23870/AT3G13750/AT1G76160/AT5G25460/AT1G68560/AT3G28200/AT3G56310/AT1G65590/AT4G19410/AT4G39640/AT5G06870/AT2G06850/AT2G38540/AT2G33530/AT4G21650/AT1G74000
GO:0005576	CC	extracellular region	26	3	7.50177e-10	2.02548e-08	AT5G19890/AT5G41870/AT5G07830/AT1G15000/AT5G23870/AT5G58480/AT4G25000/AT3G28200/AT1G53920/AT4G01130/AT1G20190/AT4G19410/AT2G38010/AT4G23820/AT2G14900/AT2G02990/AT5G06870/AT2G06850/AT5G40150/AT4G15100/AT4G20430/AT2G33530/AT4G21650/AT5G55050/AT5G14920/AT1G33811
GO:0005773	CC	vacuole	14	5	2.78434e-07	1.06733e-05	AT4G23600/AT1G15000/AT3G12500/AT5G63800/AT3G13750/AT5G56870/AT4G26140/AT3G57240/AT4G29260/AT5G23820/AT1G72150/AT3G56310/AT4G36360/AT1G74000
GO:0005773	CC	vacuole	14	4	1.02657e-06	1.47826e-05	AT4G23600/AT1G15000/AT3G12500/AT5G63800/AT3G13750/AT5G56870/AT4G26140/AT3G57240/AT4G29260/AT5G23820/AT1G72150/AT3G56310/AT4G36360/AT1G74000
GO:0009506	CC	plasmodesma	17	4	4.43194e-06	5.31832e-05	AT3G13750/AT1G76160/AT2G19760/AT5G25460/AT1G68560/AT2G34790/AT1G72150/AT1G07890/AT4G19410/AT1G20450/AT4G39640/AT5G06870/AT5G44400/AT2G06850/AT2G33530/AT1G05570/AT5G55480
GO:0009507	CC	chloroplast	25	5	1.92995e-06	5.5486e-05	AT3G46970/AT1G50320/AT5G14200/AT5G45680/AT5G14780/AT1G03680/AT4G08870/AT3G15360/AT2G37720/AT3G55330/AT1G49750/AT1G68560/AT1G55490/AT1G22530/AT1G72150/AT1G13930/AT2G37660/AT1G07890/P25697/AT5G03350/AT1G76180/AT2G06850/AT1G10960/AT1G31180/AT2G33150
GO:0009570	CC	chloroplast stroma	11	4	0.000241218	0.00205527	AT1G50320/AT5G14200/AT1G03680/AT3G15360/AT1G55490/AT1G13930/AT2G37660/AT1G07890/P25697/AT1G10960/AT1G31180
GO:0046658	CC	anchored component of plasma membrane	6	5	0.000150608	0.00216499	AT3G46550/AT5G58480/AT3G57240/AT2G05790/AT4G12880/AT5G55480
GO:0009579	CC	thylakoid	7	3	0.000307874	0.0041563	AT5G14780/AT1G03680/AT3G15360/AT3G55330/AT2G37660/P25697/AT1G31180
GO:0010319	CC	stromule	3	3	0.00179399	0.0121094	AT1G03680/AT1G55490/P25697
GO:0009543	CC	chloroplast thylakoid lumen	2	5	0.0179264	0.0578597	AT5G45680/AT3G55330
GO:0009897	CC	external side of plasma membrane	1	5	0.0181126	0.0578597	AT3G46550
GO:0009897	CC	external side of plasma membrane	1	4	0.0202463	0.0857491	AT3G46550
GO:0005886	CC	plasma membrane	20	4	0.025665	0.0932571	AT3G46550/AT4G30270/AT5G58480/AT2G19760/AT1G55490/AT1G22530/AT1G72150/AT1G13930/AT1G12310/AT1G07890/AT1G65590/AT5G03350/AT2G02990/AT3G13790/AT3G14310/AT1G76180/AT2G38540/AT5G14920/AT1G05570/AT5G55480
GO:0031977	CC	thylakoid lumen	2	4	0.0259048	0.0932571	AT5G45680/AT3G55330
GO:0010168	CC	ER body	1	5	0.0402975	0.0965461	AT5G23820
GO:0005794	CC	Golgi apparatus	7	5	0.055993	0.123448	AT5G05340/AT4G30270/AT2G34070/AT1G22530/AT1G72150/AT1G07890/AT1G66180
GO:0000148	CC	1,3-beta-D-glucan synthase complex	1	5	0.0662656	0.133694	AT1G05570
GO:0031225	CC	anchored component of membrane	3	5	0.0996663	0.165983	AT3G46550/AT5G58480/AT5G55480
GO:0009654	CC	photosystem II oxygen evolving complex	1	5	0.10392	0.165983	AT3G55330
GO:0031977	CC	thylakoid lumen	2	3	0.0431248	0.178167	AT5G45680/AT3G55330
GO:0016020	CC	membrane	12	3	0.0487606	0.178167	AT1G55490/AT1G72150/P25697/AT1G20190/AT4G19410/AT1G20450/AT1G20440/AT4G34980/AT4G24780/AT5G06870/AT2G06850/AT2G33150
GO:0005794	CC	Golgi apparatus	7	4	0.0892236	0.178447	AT5G05340/AT4G30270/AT2G34070/AT1G22530/AT1G72150/AT1G07890/AT1G66180
GO:0005938	CC	cell cortex	1	4	0.0879674	0.178447	AT2G19760
GO:0031012	CC	extracellular matrix	1	4	0.0879674	0.178447	AT1G72610
GO:0009654	CC	photosystem II oxygen evolving complex	1	4	0.115554	0.21333	AT3G55330
GO:0005829	CC	cytosol	13	4	0.118949	0.214108	AT3G46970/AT5G05340/AT2G37130/AT2G19760/AT4G29260/AT3G28200/AT1G12310/AT1G07890/P25697/AT1G20450/AT1G20440/AT1G76180/AT3G19710
GO:0031225	CC	anchored component of membrane	3	4	0.127538	0.218636	AT3G46550/AT5G58480/AT5G55480
GO:0000325	CC	plant-type vacuole	1	5	0.155671	0.221014	AT5G23820
GO:0009504	CC	cell plate	1	4	0.133484	0.223509	AT1G05570
GO:0031012	CC	extracellular matrix	1	3	0.114931	0.258594	AT1G72610
GO:0009504	CC	cell plate	1	3	0.17305	0.292022	AT1G05570
GO:0019898	CC	extrinsic component of membrane	1	4	0.209824	0.302147	AT3G55330
GO:0005819	CC	spindle	1	5	0.218908	0.307005	AT2G19760
GO:0005856	CC	cytoskeleton	1	5	0.257304	0.34407	AT2G41740
GO:0019898	CC	extrinsic component of membrane	1	3	0.268342	0.381328	AT3G55330
GO:0009536	CC	plastid	2	5	0.354195	0.428762	AT5G14200/AT1G31180
GO:0009524	CC	phragmoplast	1	4	0.363044	0.466771	AT2G19760
GO:0009536	CC	plastid	2	4	0.406891	0.496545	AT5G14200/AT1G31180
GO:0005829	CC	cytosol	13	3	0.428975	0.52647	AT3G46970/AT5G05340/AT2G37130/AT2G19760/AT4G29260/AT3G28200/AT1G12310/AT1G07890/P25697/AT1G20450/AT1G20440/AT1G76180/AT3G19710
GO:0009524	CC	phragmoplast	1	3	0.450626	0.528995	AT2G19760
GO:0005730	CC	nucleolus	2	5	0.53472	0.60884	AT2G19760/AT2G33150
GO:0009534	CC	chloroplast thylakoid	1	5	0.570235	0.642913	AT2G38540
GO:0022626	CC	cytosolic ribosome	1	5	0.581963	0.649764	AT1G55490
GO:0022626	CC	cytosolic ribosome	1	4	0.623442	0.680118	AT1G55490
GO:0005777	CC	peroxisome	1	5	0.625788	0.689155	AT2G33150
GO:0005774	CC	vacuolar membrane	2	5	0.663305	0.714787	AT4G29260/AT2G33150
GO:0005783	CC	endoplasmic reticulum	2	5	0.807672	0.860021	AT3G18490/AT3G57240
GO:0005783	CC	endoplasmic reticulum	2	4	0.855081	0.892259	AT3G18490/AT3G57240
GO:0005789	CC	endoplasmic reticulum membrane	1	5	0.863339	0.910862	AT5G45680
GO:0005739	CC	mitochondrion	3	5	0.905678	0.946845	AT5G14780/AT4G08870/AT2G33150
GO:0005739	CC	mitochondrion	3	4	0.941334	0.954592	AT5G14780/AT4G08870/AT2G33150
GO:0005737	CC	cytoplasm	8	3	0.965917	0.965917	AT5G19890/AT4G30270/AT2G19760/AT1G12310/AT1G20450/AT3G14310/AT2G06850/AT2G41740
GO:0005634	CC	nucleus	4	5	0.999998	1	AT5G19890/AT2G19760/AT1G12310/AT1G20450
GO:0016021	CC	integral component of membrane	7	5	1	1	AT5G59680/AT2G34070/AT1G51805/AT2G37720/AT1G22530/AT1G72150/AT1G05570
GO:0016021	CC	integral component of membrane	7	4	1	1	AT5G59680/AT2G34070/AT1G51805/AT2G37720/AT1G22530/AT1G72150/AT1G05570
