# Supplementary material for: Analysis of the apoplast fluid proteome during the induction of systemic acquired resistance in Arabidopsis thaliana
Source: PeerJ. 2023 Oct 20;11:e16324. doi: 10.7717/peerj.16324 (PMC10592298; doi:10.7717/peerj.16324)
Supplement: Supplemental Information 8 [file peerj-11-16324-s008.xlsx]

## Sheet: Sheet1
ID	Description	pvalue	p.adjust	qvalue	geneID	Count	Link
ath01100	Metabolic pathways - Arabidopsis thaliana (thale cress)	3.49884e-08	1.60946e-06	1.21538e-06	AT5G19890/AT3G46970/AT5G05340/AT5G07830/AT4G23600/AT5G14200/AT2G37130/AT5G14780/AT3G12500/AT4G08870/AT4G25000/AT3G55330/AT3G28200/AT2G34790/AT4G09320/AT3G56310/AT1G07890/AT1G32060/AT1G65590/AT4G39330/AT2G38010/AT5G20950/AT3G13790/AT4G24780/AT3G14310/AT4G39640/AT1G10960/AT5G40150/AT1G31180/AT2G33150/AT1G74000	31	http://www.genome.jp/kegg-bin/show_pathway?ath01100/ath:AT5G19890%09red/ath:AT3G46970%09red/ath:AT5G05340%09red/ath:AT5G07830%09red/ath:AT4G23600%09red/ath:AT5G14200%09red/ath:AT2G37130%09red/ath:AT5G14780%09red/ath:AT3G12500%09red/ath:AT4G08870%09red/ath:AT4G25000%09red/ath:AT3G55330%09red/ath:AT3G28200%09red/ath:AT2G34790%09red/ath:AT4G09320%09red/ath:AT3G56310%09red/ath:AT1G07890%09red/ath:AT1…
ath00940	Phenylpropanoid biosynthesis - Arabidopsis thaliana (thale cress)	2.31476e-05	0.000532395	0.000402038	AT5G19890/AT5G05340/AT2G37130/AT3G28200/AT2G34790/AT4G39330/AT5G40150	7	http://www.genome.jp/kegg-bin/show_pathway?ath00940/ath:AT5G19890%09red/ath:AT5G05340%09red/ath:AT2G37130%09red/ath:AT3G28200%09red/ath:AT2G34790%09red/ath:AT4G39330%09red/ath:AT5G40150%09red
ath01110	Biosynthesis of secondary metabolites - Arabidopsis thaliana (thale cress)	0.000431073	0.00660979	0.00499137	AT5G19890/AT3G46970/AT5G05340/AT5G14200/AT2G37130/AT4G08870/AT4G25000/AT3G28200/AT2G34790/AT4G09320/AT4G39330/AT5G20950/AT3G13790/AT5G40150/AT3G19710/AT1G31180/AT2G33150/AT1G74000	18	http://www.genome.jp/kegg-bin/show_pathway?ath01110/ath:AT5G19890%09red/ath:AT3G46970%09red/ath:AT5G05340%09red/ath:AT5G14200%09red/ath:AT2G37130%09red/ath:AT4G08870%09red/ath:AT4G25000%09red/ath:AT3G28200%09red/ath:AT2G34790%09red/ath:AT4G09320%09red/ath:AT4G39330%09red/ath:AT5G20950%09red/ath:AT3G13790%09red/ath:AT5G40150%09red/ath:AT3G19710%09red/ath:AT1G31180%09red/ath:AT2G33150%09red/ath:AT1…
ath00600	Sphingolipid metabolism - Arabidopsis thaliana (thale cress)	0.00073428	0.00844422	0.00637664	AT3G56310/AT1G65590/AT2G38010	3	http://www.genome.jp/kegg-bin/show_pathway?ath00600/ath:AT3G56310%09red/ath:AT1G65590%09red/ath:AT2G38010%09red
ath00531	Glycosaminoglycan degradation - Arabidopsis thaliana (thale cress)	0.00185492	0.014221	0.010739	AT5G07830/AT1G65590	2	http://www.genome.jp/kegg-bin/show_pathway?ath00531/ath:AT5G07830%09red/ath:AT1G65590%09red
ath00603	Glycosphingolipid biosynthesis - globo and isoglobo series - Arabidopsis thaliana (thale cress)	0.00185492	0.014221	0.010739	AT3G56310/AT1G65590	2	http://www.genome.jp/kegg-bin/show_pathway?ath00603/ath:AT3G56310%09red/ath:AT1G65590%09red
ath00290	Valine, leucine and isoleucine biosynthesis - Arabidopsis thaliana (thale cress)	0.00959005	0.0630203	0.0475897	AT5G14200/AT1G31180	2	http://www.genome.jp/kegg-bin/show_pathway?ath00290/ath:AT5G14200%09red/ath:AT1G31180%09red
ath01210	2-Oxocarboxylic acid metabolism - Arabidopsis thaliana (thale cress)	0.0117531	0.0675805	0.0510334	AT5G14200/AT3G19710/AT1G31180	3	http://www.genome.jp/kegg-bin/show_pathway?ath01210/ath:AT5G14200%09red/ath:AT3G19710%09red/ath:AT1G31180%09red
ath00966	Glucosinolate biosynthesis - Arabidopsis thaliana (thale cress)	0.0137269	0.0701595	0.0529809	AT5G14200/AT3G19710	2	http://www.genome.jp/kegg-bin/show_pathway?ath00966/ath:AT5G14200%09red/ath:AT3G19710%09red
ath00500	Starch and sucrose metabolism - Arabidopsis thaliana (thale cress)	0.0228749	0.105224	0.07946	AT3G46970/AT4G25000/AT5G20950/AT3G13790	4	http://www.genome.jp/kegg-bin/show_pathway?ath00500/ath:AT3G46970%09red/ath:AT4G25000%09red/ath:AT5G20950%09red/ath:AT3G13790%09red
ath00901	Indole alkaloid biosynthesis - Arabidopsis thaliana (thale cress)	0.0264194	0.110481	0.0834298	AT1G74000	1	http://www.genome.jp/kegg-bin/show_pathway?ath00901/ath:AT1G74000%09red
ath00604	Glycosphingolipid biosynthesis - ganglio series - Arabidopsis thaliana (thale cress)	0.0338426	0.12973	0.0979653	AT1G65590	1	http://www.genome.jp/kegg-bin/show_pathway?ath00604/ath:AT1G65590%09red
ath00660	C5-Branched dibasic acid metabolism - Arabidopsis thaliana (thale cress)	0.0412108	0.145823	0.110118	AT1G31180	1	http://www.genome.jp/kegg-bin/show_pathway?ath00660/ath:AT1G31180%09red
ath00052	Galactose metabolism - Arabidopsis thaliana (thale cress)	0.0525414	0.172636	0.130366	AT3G56310/AT3G13790	2	http://www.genome.jp/kegg-bin/show_pathway?ath00052/ath:AT3G56310%09red/ath:AT3G13790%09red
ath00460	Cyanoamino acid metabolism - Arabidopsis thaliana (thale cress)	0.0614884	0.181095	0.136754	AT5G20950/AT4G39640	2	http://www.genome.jp/kegg-bin/show_pathway?ath00460/ath:AT5G20950%09red/ath:AT4G39640%09red
ath00430	Taurine and hypotaurine metabolism - Arabidopsis thaliana (thale cress)	0.0629896	0.181095	0.136754	AT4G39640	1	http://www.genome.jp/kegg-bin/show_pathway?ath00430/ath:AT4G39640%09red
ath00590	Arachidonic acid metabolism - Arabidopsis thaliana (thale cress)	0.0772412	0.209006	0.15783	AT4G39640	1	http://www.genome.jp/kegg-bin/show_pathway?ath00590/ath:AT4G39640%09red
ath00511	Other glycan degradation - Arabidopsis thaliana (thale cress)	0.108542	0.27282	0.206019	AT1G65590	1	http://www.genome.jp/kegg-bin/show_pathway?ath00511/ath:AT1G65590%09red
ath00195	Photosynthesis - Arabidopsis thaliana (thale cress)	0.112686	0.27282	0.206019	AT3G55330/AT1G10960	2	http://www.genome.jp/kegg-bin/show_pathway?ath00195/ath:AT3G55330%09red/ath:AT1G10960%09red
ath01040	Biosynthesis of unsaturated fatty acids - Arabidopsis thaliana (thale cress)	0.138812	0.291483	0.220113	AT2G33150	1	http://www.genome.jp/kegg-bin/show_pathway?ath01040/ath:AT2G33150%09red
ath00040	Pentose and glucuronate interconversions - Arabidopsis thaliana (thale cress)	0.139405	0.291483	0.220113	AT4G24780/AT3G14310	2	http://www.genome.jp/kegg-bin/show_pathway?ath00040/ath:AT4G24780%09red/ath:AT3G14310%09red
ath00480	Glutathione metabolism - Arabidopsis thaliana (thale cress)	0.139405	0.291483	0.220113	AT1G07890/AT4G39640	2	http://www.genome.jp/kegg-bin/show_pathway?ath00480/ath:AT1G07890%09red/ath:AT4G39640%09red
ath00220	Arginine biosynthesis - Arabidopsis thaliana (thale cress)	0.220761	0.423125	0.319522	AT4G08870	1	http://www.genome.jp/kegg-bin/show_pathway?ath00220/ath:AT4G08870%09red
ath00513	Various types of N-glycan biosynthesis - Arabidopsis thaliana (thale cress)	0.220761	0.423125	0.319522	AT1G65590	1	http://www.genome.jp/kegg-bin/show_pathway?ath00513/ath:AT1G65590%09red
ath00592	alpha-Linolenic acid metabolism - Arabidopsis thaliana (thale cress)	0.235628	0.42816	0.323324	AT2G33150	1	http://www.genome.jp/kegg-bin/show_pathway?ath00592/ath:AT2G33150%09red
ath04016	MAPK signaling pathway - plant - Arabidopsis thaliana (thale cress)	0.24419	0.42816	0.323324	AT3G12500/AT4G09320	2	http://www.genome.jp/kegg-bin/show_pathway?ath04016/ath:AT3G12500%09red/ath:AT4G09320%09red
ath00520	Amino sugar and nucleotide sugar metabolism - Arabidopsis thaliana (thale cress)	0.251311	0.42816	0.323324	AT3G12500/AT1G65590	2	http://www.genome.jp/kegg-bin/show_pathway?ath00520/ath:AT3G12500%09red/ath:AT1G65590%09red
ath00071	Fatty acid degradation - Arabidopsis thaliana (thale cress)	0.267373	0.439256	0.331703	AT2G33150	1	http://www.genome.jp/kegg-bin/show_pathway?ath00071/ath:AT2G33150%09red
ath00280	Valine, leucine and isoleucine degradation - Arabidopsis thaliana (thale cress)	0.300545	0.463441	0.349967	AT2G33150	1	http://www.genome.jp/kegg-bin/show_pathway?ath00280/ath:AT2G33150%09red
ath00330	Arginine and proline metabolism - Arabidopsis thaliana (thale cress)	0.319217	0.463441	0.349967	AT4G08870	1	http://www.genome.jp/kegg-bin/show_pathway?ath00330/ath:AT4G08870%09red
ath00999	Biosynthesis of various plant secondary metabolites - Arabidopsis thaliana (thale cress)	0.329668	0.463441	0.349967	AT5G20950	1	http://www.genome.jp/kegg-bin/show_pathway?ath00999/ath:AT5G20950%09red
ath00240	Pyrimidine metabolism - Arabidopsis thaliana (thale cress)	0.342514	0.463441	0.349967	AT4G09320	1	http://www.genome.jp/kegg-bin/show_pathway?ath00240/ath:AT4G09320%09red
ath00053	Ascorbate and aldarate metabolism - Arabidopsis thaliana (thale cress)	0.350106	0.463441	0.349967	AT1G07890	1	http://www.genome.jp/kegg-bin/show_pathway?ath00053/ath:AT1G07890%09red
ath00561	Glycerolipid metabolism - Arabidopsis thaliana (thale cress)	0.350106	0.463441	0.349967	AT3G56310	1	http://www.genome.jp/kegg-bin/show_pathway?ath00561/ath:AT3G56310%09red
ath01212	Fatty acid metabolism - Arabidopsis thaliana (thale cress)	0.352618	0.463441	0.349967	AT2G33150	1	http://www.genome.jp/kegg-bin/show_pathway?ath01212/ath:AT2G33150%09red
ath00710	Carbon fixation in photosynthetic organisms - Arabidopsis thaliana (thale cress)	0.386809	0.494256	0.373237	AT1G32060	1	http://www.genome.jp/kegg-bin/show_pathway?ath00710/ath:AT1G32060%09red
ath01232	Nucleotide metabolism - Arabidopsis thaliana (thale cress)	0.414715	0.497525	0.375706	AT4G09320	1	http://www.genome.jp/kegg-bin/show_pathway?ath01232/ath:AT4G09320%09red
ath00230	Purine metabolism - Arabidopsis thaliana (thale cress)	0.430421	0.497525	0.375706	AT4G09320	1	http://www.genome.jp/kegg-bin/show_pathway?ath00230/ath:AT4G09320%09red
ath04146	Peroxisome - Arabidopsis thaliana (thale cress)	0.430421	0.497525	0.375706	AT2G33150	1	http://www.genome.jp/kegg-bin/show_pathway?ath04146/ath:AT2G33150%09red
ath00630	Glyoxylate and dicarboxylate metabolism - Arabidopsis thaliana (thale cress)	0.432631	0.497525	0.375706	AT5G14780	1	http://www.genome.jp/kegg-bin/show_pathway?ath00630/ath:AT5G14780%09red
ath01230	Biosynthesis of amino acids - Arabidopsis thaliana (thale cress)	0.481045	0.539708	0.40756	AT4G08870/AT1G31180	2	http://www.genome.jp/kegg-bin/show_pathway?ath01230/ath:AT4G08870%09red/ath:AT1G31180%09red
ath03018	RNA degradation - Arabidopsis thaliana (thale cress)	0.523908	0.573804	0.433307	AT1G55490	1	http://www.genome.jp/kegg-bin/show_pathway?ath03018/ath:AT1G55490%09red
ath01200	Carbon metabolism - Arabidopsis thaliana (thale cress)	0.562956	0.59234	0.447304	AT5G14780/AT1G32060	2	http://www.genome.jp/kegg-bin/show_pathway?ath01200/ath:AT5G14780%09red/ath:AT1G32060%09red
ath00270	Cysteine and methionine metabolism - Arabidopsis thaliana (thale cress)	0.566586	0.59234	0.447304	AT4G23600	1	http://www.genome.jp/kegg-bin/show_pathway?ath00270/ath:AT4G23600%09red
ath04626	Plant-pathogen interaction - Arabidopsis thaliana (thale cress)	0.748718	0.765356	0.577958	AT1G12310	1	http://www.genome.jp/kegg-bin/show_pathway?ath04626/ath:AT1G12310%09red
ath01240	Biosynthesis of cofactors - Arabidopsis thaliana (thale cress)	0.807763	0.807763	0.609981	AT4G09320	1	http://www.genome.jp/kegg-bin/show_pathway?ath01240/ath:AT4G09320%09red
