# Supplementary material for: Analysis of the apoplast fluid proteome during the induction of systemic acquired resistance in Arabidopsis thaliana
Source: PeerJ. 2023 Oct 20;11:e16324. doi: 10.7717/peerj.16324 (PMC10592298; doi:10.7717/peerj.16324)
Supplement: Supplemental Information 9 [file peerj-11-16324-s009.xlsx]

## Sheet: sheet1
Accession number	Functional classes	Protein families	(Putative) functions
AT1G03230	Proteases	Asp protease	Asp protease (pepsin family) (Peptidase family A1, subfamily A1B, non-peptidase homologues, MEROPS) (homologous to carrot EDGP and tomato XEGIP)
AT1G03680			PF00085 Thioredoxin IPR005746 Thioredoxin IPR012336 Thioredoxin-like fold IPR013766 Thioredoxin domain IPR017937 Thioredoxin, conserved site
AT1G07890			PF00141 Peroxidase IPR002016 Haem peroxidase IPR002207 Class I peroxidase IPR010255 Haem peroxidase superfamily IPR019793 Peroxidases heam-ligand binding site IPR019794 Peroxidase, active site
AT1G09310			PF04398 Protein of unknown function, DUF538 IPR007493 Protein of unknown function DUF538
AT1G12310			PF13499 EF-hand domain pair PF13405 EF-hand domain IPR002048 EF-hand domain IPR011992 EF-hand domain pair IPR018247 EF-Hand 1, calcium-binding site
AT1G13930
AT1G15000	Proteases	Ser carboxypeptidase	Ser carboxypeptidase (AtSCPL50) (Peptidase family S10 unassigned peptidases, MEROPS)
AT1G20190	Proteins acting on cell wall carbohydrates	expansin	alpha-expansin (ATHEXP ALPHA 1.14) (AtEXPA11)
AT1G20440	Miscellaneous		PF00257 Dehydrin IPR000167 Dehydrin IPR030513 Dehydrin, conserved site
AT1G20450	Miscellaneous		PF00257 Dehydrin IPR000167 Dehydrin IPR030513 Dehydrin, conserved site
AT1G21350			PF00578 AhpC/TSA family IPR000866 Alkyl hydroperoxide reductase subunit C/ Thiol specific antioxidant IPR012336 Thioredoxin-like fold
AT1G22530			PF03765 CRAL/TRIO, N-terminal domain PF00650 CRAL/TRIO domain IPR001071 Cellular retinaldehyde binding/alpha-tocopherol transport IPR001251 CRAL-TRIO lipid binding domain IPR009038 GOLD domain IPR011074 CRAL/TRIO, N-terminal domain
AT1G31180			PF00180 Isocitrate/isopropylmalate dehydrogenase IPR001804 Isocitrate and isopropylmalate dehydrogenases family IPR004429 Isopropylmalate dehydrogenase IPR019818 Isocitrate/isopropylmalate dehydrogenase, conserved site IPR024084 Isopropylmalate dehydrogenase-like domain
AT1G32060			PF00485 Phosphoribulokinase / Uridine kinase family IPR006082 Phosphoribulokinase IPR006083 Phosphoribulokinase/uridine kinase IPR027417 P-loop containing nucleoside triphosphate hydrolase
AT1G33811	Proteins related to lipid metabolism	GDSL family	lipase acylhydrolase (GDSL family)
AT1G49750	Proteins with interaction domains (with proteins or polysaccharides)	LRR protein	expressed protein (LRR domains)
AT1G50320			PF00085 Thioredoxin IPR005746 Thioredoxin IPR012336 Thioredoxin-like fold IPR013766 Thioredoxin domain
AT1G53920	Proteins related to lipid metabolism	GDSL family	lipase acylhydrolase (AtGLIP5, GDSL LIPASE LIKE 5, GDSL-motif lipase/hydrolase 5)
AT1G55490			PF00118 TCP-1/cpn60 chaperonin family IPR001844 Chaperonin Cpn60 IPR002423 Chaperonin Cpn60/TCP-1 family IPR018370 Chaperonin Cpn60, conserved site IPR027409 GroEL-like apical domain superfamily IPR027413 GroEL-like equatorial domain superfamily
AT1G65590	Proteins acting on cell wall carbohydrates	glycoside hydrolase (GH)	glycoside hydrolase family 20 - GH20 (N-acetyl-beta-glucosaminidase)
AT1G68560	Proteins acting on cell wall carbohydrates	glycoside hydrolase (GH)	glycoside hydrolase family 31 - GH31 (alpha-xylosidase) (XYL1)
AT1G72150			PF03765 CRAL/TRIO, N-terminal domain PF00650 CRAL/TRIO domain IPR001251 CRAL-TRIO lipid binding domain IPR009038 GOLD domain IPR011074 CRAL/TRIO, N-terminal domain
AT1G72610	Miscellaneous	germin	germin (subfamily 3 member 1, GLP1)
AT1G74000	Miscellaneous		strictosidine synthase
AT1G76160	Oxido-reductases	multicopper oxidase	multicopper oxidase (AtSKS5, homologous to SKU5)
AT1G76180	Miscellaneous		PF00257 Dehydrin IPR000167 Dehydrin IPR030513 Dehydrin, conserved site
AT2G02990	Miscellaneous		ribonuclease T2
AT2G06850	Proteins acting on cell wall carbohydrates	glycoside hydrolase (GH)	glycoside hydrolase family 16 - GH16 (endoxyloglucan transferase) (At-XTH4)
AT2G10940	Proteins related to lipid metabolism	lipid transfer protein (LTP)	homologous to non-specific lipid transfer protein
AT2G14900	Miscellaneous	gibberellic acid-stimulated Arabidopsis (GASA) protein	gibberellic acid-stimulated Arabidopsis (AtGASA7) protein
AT2G19760			PF00235 Profilin IPR005455 Profilin IPR027310 Profilin conserved site
AT2G23610			PF12697 Alpha/beta hydrolase family IPR000073 Alpha/beta hydrolase fold-1 IPR029058 Alpha/Beta hydrolase fold
AT2G24280	Proteases	peptidase family S28	Pro-Xaa carboxypeptidase (Peptidase family S28.A01, MEROPS)
AT2G33150			PF02803 Thiolase, C-terminal domain PF00108 Thiolase, N-terminal domain IPR002155 Thiolase IPR016039 Thiolase-like IPR020610 Thiolase, active site IPR020613 Thiolase, conserved site IPR020615 Thiolase, acyl-enzyme intermediate active site IPR020616 Thiolase, N-terminal IPR020617 Thiolase, C-terminal
AT2G33530	Proteases	Ser carboxypeptidase	Ser carboxypeptidase (AtSCPL46) (Peptidase family, S10.A42, MEROPS)
AT2G34790	Oxido-reductases	berberine-bridge oxido-reductase-like (BBE-like)	berberine-bridge enzyme (S)-reticulin:oxygen oxido-reductase-like (AtBBE-like 15)
AT2G37660			PF13460 NAD(P)H-binding IPR016040 NAD(P)-binding domain
AT2G37720	Miscellaneous		PF13839 GDSL/SGNH-like Acyl-Esterase family found in Pmr5 and Cas1p PF14416 PMR5 N terminal Domain IPR026057 PC-Esterase IPR025846 PMR5 N-terminal domain
AT2G38540	Proteins related to lipid metabolism	lipid transfer protein (LTP)	non-specific lipid-transfer protein (AtLTP1.5, AtLTP1)
AT2G38870			PF00280 Potato inhibitor I family IPR000864 Proteinase inhibitor I13, potato inhibitor I
AT2G45180	Proteins related to lipid metabolism	lipid transfer protein (LTP)	homologous to non-specific lipid transfer protein
AT3G05900
AT3G12500	Proteins acting on cell wall carbohydrates	glycoside hydrolase (GH)	glycoside hydrolase family 19 - GH19
AT3G13750	Proteins acting on cell wall carbohydrates	glycoside hydrolase (GH)	glycoside hydrolase family 35 - GH35 (beta-galactosidase) (AtBGAL1)
AT3G13790	Proteins acting on cell wall carbohydrates	glycoside hydrolase (GH)	glycoside hydrolase family 32 - GH32 (fructosidase/invertase) (AtcwINV1)
AT3G14310	Proteins acting on cell wall carbohydrates	carbohydrate esterase (CE)	carbohydrate esterase family 8 - CE8 (pectin methylesterase - PME) (AtPME3)
AT3G15360			PF00085 Thioredoxin IPR005746 Thioredoxin IPR012336 Thioredoxin-like fold IPR013766 Thioredoxin domain IPR017937 Thioredoxin, conserved site
AT3G16370	Proteins related to lipid metabolism	GDSL family	lipase acylhydrolase (GDSL family)
AT3G18490	Proteases	Asp protease	Asp protease (pepsin family) (Peptidase family A01.A09, MEROPS) (ASPG1, ASPARTIC PROTEASE IN GUARD CELL 1)
AT3G19710			PF01063 Amino-transferase class IV IPR001544 Aminotransferase class IV IPR005786 Branched-chain amino acid aminotransferase II IPR033939 Branched-chain aminotransferase
AT3G26380	Proteins acting on cell wall carbohydrates	glycoside hydrolase (GH)	glycoside hydrolase family 27 - GH27 (alpha-galactosidase/melibiase)
AT3G28200	Oxido-reductases	class III peroxidase	peroxidase (AtPrx31)
AT3G46550	Signaling	fasciclin-like arabinogalactan protein (FLA)	fasciclin-like arabinogalactan protein (FLA4, SOS5)
AT3G55330			PF01789 PsbP IPR002683 PsbP, C-terminal IPR016123 Mog1/PsbP, alpha/beta/alpha sandwich
AT3G56310	Proteins acting on cell wall carbohydrates	glycoside hydrolase (GH)	glycoside hydrolase family 27 - GH27 (alpha-galactosidase/melibiase)
AT3G57240	Proteins acting on cell wall carbohydrates	glycoside hydrolase (GH)	glycoside hydrolase family 17 - GH17 (beta-1,3-glucosidase) (BG3) (PR3)
AT3G61490	Proteins acting on cell wall carbohydrates	glycoside hydrolase (GH)	glycoside hydrolase family 28 - GH28 (polygalacturonase)
AT4G01130	Proteins related to lipid metabolism	GDSL family	lipase acylhydrolase (GDSL family)
AT4G09320			PF00334 Nucleoside diphosphate kinase IPR001564 Nucleoside diphosphate kinase IPR023005 Nucleoside diphosphate kinase, active site
AT4G12880	Oxido-reductases	blue copper binding protein	early nodulin AtEN20 homologous to blue copper binding protein
AT4G19410	Proteins acting on cell wall carbohydrates	carbohydrate esterase (CE)	carbohydrate esterase family 13 - CE13 (pectin acylesterase - PAE) (AtPAE7)
AT4G21650	Proteases	Ser protease	Ser protease (subtilisin) (AtSBT3.13) (Peptidase family S08.A48, MEROPS)
AT4G23170	Unknown function		expressed protein (Gnk2-homologous domain, antifungal protein of Ginkgo seeds)
AT4G23600			PF00155 Aminotransferase class I and II IPR004839 Aminotransferase, class I/classII IPR005958 Tyrosine/nicotianamine aminotransferase IPR015421 Pyridoxal phosphate-dependent transferase, major domain IPR015422 Pyridoxal phosphate-dependent transferase domain 1 IPR015424 Pyridoxal phosphate-dependent transferase
AT4G23670			PF00407 Pathogenesis-related protein Bet v I family IPR000916 Bet v I/Major latex protein IPR023393 START-like domain superfamily
AT4G23820	Proteins acting on cell wall carbohydrates	glycoside hydrolase (GH)	glycoside hydrolase family 28 - GH28 (polygalacturonase)
AT4G24780	Proteins acting on cell wall carbohydrates	polysaccharide lyase (PL)	polysaccharide lyase family 1 - PL1 (pectate lyase) (AtPLL19)
AT4G30270	Proteins acting on cell wall carbohydrates	glycoside hydrolase (GH)	glycoside hydrolase family 16 - GH16 (endoxyloglucan transferase) (meri-5) (At-XTH24)
AT4G34980	Proteases	Ser protease	Ser protease (subtilisin) (AtSBT1.6) (Peptidase family S08.A39, MEROPS)
AT4G39330			PF00107 Zinc-binding dehydrogenase PF08240 Alcohol dehydrogenase GroES-like domain IPR002085 Alcohol dehydrogenase superfamily, zinc-type IPR002328 Alcohol dehydrogenase, zinc-type, conserved site IPR011032 GroES-like superfamily IPR013149 Alcohol dehydrogenase, C-terminal IPR013154 Alcohol dehydrogenase, N-terminal IPR016040 NAD(P)-binding domain IPR020843 Polyketide synthase, enoylreductase dom…
AT4G39640			PF01019 Gamma-glutamyltranspeptidase IPR000101 Gamma-glutamyltranspeptidase IPR029055 Nucleophile aminohydrolases, N-terminal
AT5G03350	Proteins with interaction domains (with proteins or polysaccharides)	lectin	lectin (legume lectin domain)
AT5G05340	Oxido-reductases	class III peroxidase	peroxidase (AtPrx52)
AT5G06870	Proteins with interaction domains (with proteins or polysaccharides)	LRR protein	PGIP2 (LRR domains)
AT5G07030	Proteases	Asp protease	Asp protease (pepsin family) (Peptidase family A01.A54, MEROPS)
AT5G07830	Proteins acting on cell wall carbohydrates	glycoside hydrolase (GH)	glycoside hydrolase family 79 - GH79 (endo-beta-glucuronidase/heparanase)
AT5G12940	Proteins with interaction domains (with proteins or polysaccharides)	LRR protein	expressed protein (LRR domains)
AT5G14200			PF00180 Isocitrate/isopropylmalate dehydrogenase IPR001804 Isocitrate and isopropylmalate dehydrogenases family IPR004429 Isopropylmalate dehydrogenase IPR019818 Isocitrate/isopropylmalate dehydrogenase, conserved site IPR024084 Isopropylmalate dehydrogenase-like domain
AT5G14780			PF00389 D-isomer specific 2-hydroxyacid dehydrogenase, catalytic domain PF02826 D-isomer specific 2-hydroxyacid dehydrogenase, NAD binding domain IPR006139 D-isomer specific 2-hydroxyacid dehydrogenase, catalytic domain IPR006140 D-isomer specific 2-hydroxyacid dehydrogenase, NAD-binding domain IPR016040 NAD(P)-binding domain IPR029752 D-isomer specific 2-hydroxyacid dehydrogenase, NAD-binding do…
AT5G14920	Miscellaneous	gibberellic acid-stimulated Arabidopsis (GASA) protein	gibberellic acid-stimulated Arabidopsis (AtGASA14) protein
AT5G20950	Proteins acting on cell wall carbohydrates	glycoside hydrolase (GH)	glycoside hydrolase family 3 - GH3
AT5G23820	Proteins related to lipid metabolism		expressed protein (MD-2-related lipid-recognition (ML) domain)
AT5G23870	Proteins acting on cell wall carbohydrates	carbohydrate esterase (CE)	carbohydrate esterase family 13 - CE13 (pectin acylesterase - PAE) (AtPAE9)
AT5G25460	Unknown function		expressed protein (DUF642)
AT5G41870	Proteins acting on cell wall carbohydrates	glycoside hydrolase (GH)	glycoside hydrolase family 28 - GH28 (polygalacturonase)
AT5G44400	Oxido-reductases	berberine-bridge oxido-reductase-like (BBE-like)	berberine-bridge enzyme (S)-reticulin:oxygen oxido-reductase-like (AtBBE-like 26)
AT5G55050	Proteins related to lipid metabolism	GDSL family	lipase acylhydrolase (GDSL family)
AT5G55480	Miscellaneous		glycerophosphoryl diester phosphodiesterase (GDPDL4, GPDL1)
AT5G56870	Proteins acting on cell wall carbohydrates	glycoside hydrolase (GH)	glycoside hydrolase family 35 - GH35 (beta-galactosidase) (AtBGAL4)
AT5G58480	Proteins acting on cell wall carbohydrates	glycoside hydrolase (GH)	glycoside hydrolase family 17 - GH17 (beta-1,3-glucosidase)
AT5G62360	Proteins with interaction domains (with proteins or polysaccharides)		plant invertase/ pectin methylesterase inhibitor (PMEI)
AT5G63800	Proteins acting on cell wall carbohydrates	glycoside hydrolase (GH)	glycoside hydrolase family 35 - GH35 (beta-galactosidase) (AtBGAL6)
