# Supplementary material for: Analysis of the apoplast fluid proteome during the induction of systemic acquired resistance in Arabidopsis thaliana
Source: PeerJ. 2023 Oct 20;11:e16324. doi: 10.7717/peerj.16324 (PMC10592298; doi:10.7717/peerj.16324)
Supplement: Supplemental Information 10 [file peerj-11-16324-s010.xlsx]

## Sheet: Sheet1
Proteins exclusive up in SAR-induced apoplast				Proteins commonly up in SAR-induced apoplast and SAR induced leaves				Proteins exclusive up in SAR-induced leaves					Proteins exclusive down in SAR-induced leaves					Proteins commonly down in SAR-induced apoplast and SAR induced leaves				Proteins exclusive down in SAR-induced apoplast					Proteins up in SAR-induced leaves down in SAR-induced apoplast
AT5G19890		Peroxidase superfamily protein		AT4G08870	ARGAH2	arginine amidohydrolase 2		AT2G27710	P2Y	RIBOSOMAL PROTEIN P2Y			AT5G50920	HSP93-V	HEAT SHOCK PROTEIN 93-V			AT2G37660		NAD(P)-binding Rossmann-fold superfamily protein		AT2G19760	PRF1	profilin 1			AT1G32060	PRK	phosphoribulokinase
AT3G46970	PHS2	alpha-glucan phosphorylase 2						AT5G52840		NADH-ubiquinone oxidoreductase-like protein			AT3G56190	ASNAP	ALPHA-SOLUBLE NSF ATTACHMENT PROTEIN 2							AT3G05900		neurofilament protein-like protein			AT1G55490	CPN60B	chaperonin-60beta1
AT3G18490	ASPG1	ASPARTIC PROTEASE IN GUARD CELL 1						AT5G09650	PPA6	PYROPHOSPHORYLASE 6			AT4G38980		hypothetical protein							AT2G05790		O-Glycosyl hydrolases family 17 protein
AT1G50320	THX	thioredoxin X						At1G29910	CAB3	CHLOROPHYLL A/B BINDING PROTEIN 3			AT4G38970	FBA2	FRUCTOSE-BISPHOSPHATE ALDOLASE 2							AT5G25460	DGR2	DUF642 L-GalL responsive gene 2
AT5G59680		Leucine-rich repeat protein kinase family protein						AT2G30870	GSTF10	GLUTATHIONE S-TRANSFERASE PHI 10			AT1G74090	SOT18	DESULFO-GLUCOSINOLATE SULFOTRANSFERASE 18							AT1G49750		Leucine-rich repeat (LRR) family protein
AT5G05340	PRX52	peroxidase 52						AT1G06680	PSII-P	PHOTOSYSTEM II SUBUNIT P-1			AT5G63570	GSA1	GLUTAMATE-1-SEMIALDEHYDE-2,1-AMINOMUTASE							AT4G23670		Polyketide cyclase/dehydrase and lipid transport superfamily protein
AT5G41870	PGF15	Polygalacturonase Clade F 15						AT2G24060	SVR9	SUPPRESSOR OF VARIEGATION9			AT3G60820	PBF1	proteasome beta subunit PBF1							AT1G68560	TRG1	thermoinhibition resistant germination 1
AT5G07830	GUS2	glucuronidase 2						At2G39730	RCA	RUBISCO ACTIVASE			AT3G46780	PTAC16	PLASTID TRANSCRIPTIONALLY ACTIVE 16							AT1G22530	PATL2	PATELLIN 2
AT4G23600	JR2	JASMONIC ACID RESPONSIVE 2						AT1G12840	VHA-C	THALIANA VACUOLAR ATP SYNTHASE SUBUNIT C												AT4G29260	VSP3	Vegetative Storage Protein 3
AT3G46550	FLA4	fasciclin-like arabinogalactan-protein 4						AT5G26000	BGLU38	BETA GLUCOSIDASE 38												AT5G23820	ML3	MD2-related lipid recognition 3
AT5G14200	IMD1	isopropylmalate dehydrogenase 1						AT4G36760		aminopeptidase P1												AT3G28200		unknown
AT5G45680	FKBP13	FK506-binding protein 13						AT3G25770	AOC2	ALLENE OXIDE CYCLASE 2												AT2G34790	AtBBE-like 15	Berberine Bridge Enzyme-Like 15
AT5G57550	XTR3	xyloglucan endotransglycosylase 3						AT1G70890	MLP43	MLP-LIKE PROTEIN 43												AT1G72150	PATL1	PATELLIN 1
AT2G37130		Peroxidase superfamily protein						AT3G08740		elongation factor P (EF-P) family protein												AT1G13930		unknown
AT5G14780	FDH	formate dehydrogenase						AT2G29450	GSTU5	GLUTATHIONE S-TRANSFERASE TAU 5												AT4G09320	NDK1	nucleoside diphosphate kinase 1
AT4G23170	CRK9	CYSTEINE-RICH RLK (RECEPTOR-LIKE PROTEIN KINASE) 9						AT3G44860	FAMT	FARNESOIC ACID CARBOXYL-O-METHYLTRANSFERASE												AT1G12310		Calcium-binding EF-hand family protein
AT4G30270	MERI5B	MERISTEM 5						AT2G21870	MGP1	MALE GAMETOPHYTE DEFECTIVE 1												AT1G53920	GLIP5	GDSL-motif lipase 5
AT1G15000	scpl50	serine carboxypeptidase-like 50						AT5G20890	CCT2	CHAPERONIN CONTAINING T-COMPLEX POLYPEPTIDE-1 SUBUNIT 2												AT4G12880	ENODL19	early nodulin-like protein 19
AT5G23870	PAE9	pectin acetylesterase 9						AT2G33210	HSP60	HEAT SHOCK PROTEIN 60-2												AT3G56310	AGAL3	Alpha-GALACTOSIDASE 3
AT1G03680	TRX-M1	thioredoxin M-type 1						AT1G15140	FNRL	FERREDOXIN-NADP(+) OXIDOREDUCTASE -LIKE												AT1G07890	MEE6	maternal effect embryo arrest 6
AT3G12500	PR-3	PATHOGENESIS-RELATED 3, basic chitinase						AT1G61000	NUF2	NUCLEAR FILAMENT-CONTAINING PROTEIN 2												AT4G01130		GDSL-motif lipase
AT5G58480		O-Glycosyl hydrolases family 17 protein						At3G48560	IMR1	IMIDAZOLE RESISTANT 1												AT1G65590	HEXO3	beta-hexosaminidase 3
AT1G21350		Thioredoxin superfamily protein						AT1G50200	ALATS	ALANYL-TRNA SYNTHETASE												AT1G20190	EXPA11	expansin 11
AT4G29680		Alkaline-phosphatase-like family protein						AT4G25080	CHLM	MAGNESIUM-PROTOPORPHYRIN IX METHYLTRANSFERASE												AT4G39330	CAD9	cinnamyl alcohol dehydrogenase 9
AT2G38870		Predicted to encode a PR (pathogenesis-related) peptide that belongs to the PR-6 proteinase inhibitor family						AT1G48030	MTLPD1	MITOCHONDRIAL LIPOAMIDE DEHYDROGENASE 1												AT4G19410	PAE7	pectin acetylesterase 7
AT2G34070	TBL37	TRICHOME BIREFRINGENCE-LIKE 37						AT4G33010	GLDP1	GLYCINE DECARBOXYLASE P-PROTEIN 1												AT2G38010	AtNCER2	neutral ceramidase 2
AT1G51805	SIF3	stress induced factor 3						AT1G02930	GSTF6	GLUTATHIONE S-TRANSFERASE 6												AT4G23820	PGF13	Pectin lyase-like superfamily protein
AT5G63800	BGAL6	beta-galactosidase 6						AT5G66190	LFNR1	LEAF-TYPE CHLOROPLAST-TARGETED FNR 1												AT2G14900	GASA7	Gibberellin-regulated family protein
AT4G25000	AMY1	alpha-amylase-like																				AT1G20450	LTI45	LOW TEMPERATURE INDUCED 45
AT3G15360	TRX-M4	thioredoxin M-type 4																				AT1G09310	SVBL	SVB-like
AT3G13750	BGAL1	beta galactosidase 1																				AT1G03230	SAP1	secreted aspartic protease 1
AT2G37720	TBL15	TRICHOME BIREFRINGENCE-LIKE 15																				AT5G03350	SAI-LLP1	SA-induced legume lectin-like protein 1
AT5G56870	BGAL4	beta-galactosidase 4																				AT5G20950	BGLC1	Glycosyl hydrolase family protein
AT3G55330	PPL1	PsbP-like protein 1																				AT5G62360	PMEI13	pectin methyl-esterase inhibitor 13
AT4G26140	BGAL12	beta-galactosidase 12																				AT3G16370	GGL19	GDSL-motif lipase
AT3G57240	BG3	beta-1,3-glucanase 3																				AT1G20440	COR47	cold-regulated 47
AT3G26380	APSE	ARAPASE																				AT1G72610	GER1	germin-like protein 1
AT1G76160	sks5	SKU5 similar 5																				AT2G02990	RNS1	ribonuclease 1
AT1G10960	FD1	ferredoxin 1																				AT3G13790	CWI1	ARABIDOPSIS THALIANA CELL WALL INVERTASE 1
AT5G40150		Peroxidase superfamily protein																				AT4G34980	SLP2	subtilisin-like serine protease 2
AT4G15100	scpl30	serine carboxypeptidase-like 30																				AT4G24780	PLL19	Encodes a pectate lyase involved in response to nematodes
AT4G36360	BGAL3	beta-galactosidase 3																				AT3G14310	PME3	pectin methylesterase 3
AT3G19710	BCAT4	branched-chain aminotransferase4																				AT4G39640	GGT1	gamma-glutamyl transpeptidase 1
AT1G31180	IMDH3	isopropylmalate dehydrogenase 3																				AT5G06870	PGIP2	polygalacturonase inhibiting protein 2
AT4G20430		unknown																				AT5G44400	AtBBE26	FAD-binding Berberine family protein
AT2G23610	MES3	methyl esterase 3																				AT2G44260		DUF946 family protein
AT3G61490	PGF9	Polygalacturonase Clade F 9																				AT1G76180	ERD14	EARLY RESPONSE TO DEHYDRATION 14
AT2G33150	PKT3	peroxisomal 3-ketoacyl-CoA thiolase 3																				AT2G06850	XTH4	xyloglucan endotransglucosylase/hydrolase 4
																						AT2G38540	LTP1	lipid transfer protein 1
																						AT2G33530	scpl46	serine carboxypeptidase-like 46
																						AT4G21650	SBT3.13	subtilase 3.13
																						AT5G55050		GDSL-motif lipase
																						AT5G14920	GASA14	A-stimulated in Arabidopsis 14
																						AT5G12940		Leucine-rich repeat (LRR) family protein
																						AT2G45180	DRN1	Lipid Transfer Protein 1
																						AT5G07030		Eukaryotic aspartyl protease family protein
																						AT2G10940		lipid-transfer protein
																						AT3G23450	KRATOS
																						AT1G33811	GGL7	GDSL-motif lipase
																						AT1G05570	CALS1	callose synthase 1
																						AT2G41740	VLN2	villin 2
																						AT5G55480	GDPDL4	Glycerophosphodiester phosphodiesterase (GDPD) like 4
																						AT1G66180		putative aspartyl protease
																						AT2G24280		alpha/beta-Hydrolases superfamily protein
																						AT1G74000	SS3	strictosidine synthase 3
