# Supplementary material for: Analysis of the apoplast fluid proteome during the induction of systemic acquired resistance in Arabidopsis thaliana
Source: PeerJ. 2023 Oct 20;11:e16324. doi: 10.7717/peerj.16324 (PMC10592298; doi:10.7717/peerj.16324)
Supplement: Supplemental Information 11 [file peerj-11-16324-s011.xlsx]

## Sheet: Sheet1
DAPs exclusive in SAR-induced apoplast				DAPs commonly down in SAR-iduced apoplast and Pst-induced secretory proteome					DAPs exclusive in the Pst-induced secretory proteome
AT5G19890		Peroxidase superfamily protein		AT4G09320	NDK1	nucleoside diphosphate kinase 1			AT1G14890		Plant invertase/pectin methylesterase inhibitor superfamily protein
AT3G46970	PHS2	alpha-glucan phosphorylase 2		AT2G02990	RNS1	ribonuclease 1			AT5G64120	PRX71	PEROXIDASE 71
AT3G18490	ASPG1	ASPARTIC PROTEASE IN GUARD CELL 1							AT2G43570	CHI	CHITINASE
AT1G50320	THX	thioredoxin X							AT1G78380	GST8	GLUTATHIONE TRANSFERASE 8
AT5G59680		Leucine-rich repeat protein kinase family protein							AT3G52880	MDAR1	MONODEHYDROASCORBATE REDUCTASE 1
AT5G05340	PRX52	peroxidase 52							AT3G55440	CYTOTPI	CYTOSOLIC TRIOSE PHOSPHATE ISOMERASE
AT5G41870	PGF15	Polygalacturonase Clade F 15							AT4G25100	FSD1	FE SUPEROXIDE DISMUTASE 1
AT5G07830	GUS2	glucuronidase 2							AT5G19440		unknown
AT4G23600	JR2	JASMONIC ACID RESPONSIVE 2							AT1G13440	GAPC2	GLYCERALDEHYDE-3-PHOSPHATE DEHYDROGENASE C-2
AT3G46550	FLA4	fasciclin-like arabinogalactan-protein 4							AT1G23190	PGM3	PHOSPHOGLUCOMUTASE 3
AT5G14200	IMD1	isopropylmalate dehydrogenase 1							AT1G56070	LOS1	Elongation factor 2
AT5G45680	FKBP13	FK506-binding protein 13							AT1G63770		Peptidase M1 family protein
AT5G57550	XTR3	xyloglucan endotransglycosylase 3							AT2G36530	ENO2	Bifunctional enolase 2/transcriptional activator
AT2G37130		Peroxidase superfamily protein							AT5G17920	METS1	METHIONINE SYNTHESIS 1
AT5G14780	FDH	formate dehydrogenase							AT1G35720	ANN1	Annexin D1
AT4G23170	CRK9	CYSTEINE-RICH RLK (RECEPTOR-LIKE PROTEIN KINASE) 9							AT1G45145	TRX-H	THIOREDOXIN H-TYPE 5
AT4G30270	MERI5B	MERISTEM 5							AT1G78830	CCLP	CURCULIN-LIKE LECTIN FAMILY PROTEIN
AT1G15000	scpl50	serine carboxypeptidase-like 50							AT1G79550	PGK3	PHOSPHOGLYCERATE KINASE 3
AT5G23870	PAE9	pectin acetylesterase 9							AT2G16060	HB1	HEMOGLOBIN 1
AT1G03680	TRX-M1	thioredoxin M-type 1							AT2G21130	CYP19-2	Peptidyl-prolyl cis-trans isomerase
AT3G12500	PR-3	PATHOGENESIS-RELATED 3, basic chitinase							AT2G32520		Alpha/beta-Hydrolases superfamily protein
AT5G58480		O-Glycosyl hydrolases family 17 protein							AT3G28940	AIG2B	Protein AIG2 B
AT1G21350		Thioredoxin superfamily protein							AT5G59880	ADF3	ACTIN DEPOLYMERIZING FACTOR 3
AT4G29680		Alkaline-phosphatase-like family protein							AT5G06860	PGIP1	POLYGALACTURONASE INHIBITING PROTEIN 1
AT2G38870		Predicted to encode a PR (pathogenesis-related) peptide that belongs to the PR-6 proteinase inhibitor family							AT5G44130	FLA13	FASCICLIN-LIKE ARABINOGALACTAN PROTEIN 13 PRECURSOR
AT2G34070	TBL37	TRICHOME BIREFRINGENCE-LIKE 37							AT1G74010		Calcium-dependent phosphotriesterase superfamily protein
AT4G08870	ARGAH2	arginine amidohydrolase 2							AT2G01820	TMK3	TRANSMEMBRANE KINASE 3
AT1G51805	SIF3	stress induced factor 3							AT2G17760	APF1	Aspartyl protease family protein 1
AT5G63800	BGAL6	beta-galactosidase 6							AT2G46880	PAP14	PURPLE ACID PHOSPHATASE 14
AT4G25000	AMY1	alpha-amylase-like							AT3G18280	TED4	TRACHEARY ELEMENT DIFFERENTIATION-RELATED 4
AT3G15360	TRX-M4	thioredoxin M-type 4							AT4G34480		Glucan endo-1,3-beta-glucosidase 7
AT3G13750									AT5G06720	PRX53	PEROXIDASE 53
AT2G37720	TBL15	TRICHOME BIREFRINGENCE-LIKE 15							AT5G67360	SBT1.7	SUBTILISIN-LIKE SERINE PROTEASE 1.7
AT5G56870	BGAL4	beta-galactosidase 4							AT4G25810	XTR6	XYLOGLUCAN ENDOTRANSGLYCOSYLASE 6
AT3G55330	PPL1	PsbP-like protein 1							AT3G54420	CHIV	CHITINASE CLASS IV
AT4G26140	BGAL12	beta-galactosidase 12							AT4G34180		CYCLASE1
AT3G57240	BG3	beta-1,3-glucanase 3
AT3G26380	APSE	ARAPASE
AT2G19760	PRF1	profilin 1
AT3G05900		neurofilament protein-like protein
AT2G05790		O-Glycosyl hydrolases family 17 protein
AT5G25460	DGR2	DUF642 L-GalL responsive gene 2
AT1G49750		Leucine-rich repeat (LRR) family protein
AT4G23670		Polyketide cyclase/dehydrase and lipid transport superfamily protein
AT1G55490	CPN60B	chaperonin-60beta1
AT1G22530	PATL2	PATELLIN 2
AT4G29260	VSP3	Vegetative Storage Protein 3
AT5G23820	ML3	MD2-related lipid recognition 3
AT3G28200		unknown
AT2G34790	AtBBE-like 15	Berberine Bridge Enzyme-Like 15
AT1G72150	PATL1	PATELLIN 1
AT1G13930		unknown
AT2G37660		NAD(P)-binding Rossmann-fold superfamily protein
AT1G12310		Calcium-binding EF-hand family protein
AT1G53920	GLIP5	GDSL-motif lipase 5
AT4G12880	ENODL19	early nodulin-like protein 19
AT3G56310	AGAL3	Alpha-GALACTOSIDASE 3
AT1G07890	MEE6	maternal effect embryo arrest 6
AT1G32060	PRK	phosphoribulokinase
AT4G01130		GDSL-motif lipase
AT1G65590	HEXO3	beta-hexosaminidase 3
AT1G20190	EXPA11	expansin 11
AT4G39330	CAD9	cinnamyl alcohol dehydrogenase 9
AT4G19410	PAE7	pectin acetylesterase 7
AT2G38010	AtNCER2	neutral ceramidase 2
AT4G23820	PGF13	Pectin lyase-like superfamily protein
AT2G14900	GASA7	Gibberellin-regulated family protein
AT1G20450	LTI45	LOW TEMPERATURE INDUCED 45
AT1G09310	SVBL	SVB-like
AT1G03230	SAP1	secreted aspartic protease 1
AT5G03350	SA-induced legume lectin-like protein 1
AT5G20950	BGLC1	Glycosyl hydrolase family protein
AT5G62360	PMEI13	pectin methyl-esterase inhibitor 13
AT3G16370	GGL19	GDSL-motif lipase
AT1G20440	COR47	cold-regulated 47
AT1G72610	GER1	germin-like protein 1
AT3G13790	CWI1	ARABIDOPSIS THALIANA CELL WALL INVERTASE 1
AT4G34980	SLP2	subtilisin-like serine protease 2
AT4G24780	PLL19	Encodes a pectate lyase involved in response to nematodes
AT3G14310	PME3	pectin methylesterase 3
AT4G39640	GGT1	gamma-glutamyl transpeptidase 1
AT5G06870	PGIP2	polygalacturonase inhibiting protein 2
AT5G44400	AtBBE26	FAD-binding Berberine family protein
AT2G44260		DUF946 family protein
AT1G76180	ERD14	EARLY RESPONSE TO DEHYDRATION 14
AT2G06850	XTH4	xyloglucan endotransglucosylase/hydrolase 4
AT1G10960	FD1	ferredoxin 1
AT5G40150		Peroxidase superfamily protein
AT4G15100	scpl30	serine carboxypeptidase-like 30
AT4G36360	BGAL3	beta-galactosidase 3
AT3G19710	BCAT4	branched-chain aminotransferase4
AT1G31180	IMDH3	isopropylmalate dehydrogenase 3
AT4G20430		unknown
AT2G23610	MES3	methyl esterase 3
AT3G61490	PGF9	Polygalacturonase Clade F 9
AT2G33150
AT1G76160	sks5	SKU5 similar 5
AT1G68560	TRG1	thermoinhibition resistant germination 1
AT2G38540	LTP1	lipid transfer protein 1
AT2G33530	scpl46	serine carboxypeptidase-like 46
AT4G21650	SBT3.13	subtilase 3.13
AT5G55050		GDSL-motif lipase
AT5G14920	GASA14	A-stimulated in Arabidopsis 14
AT5G12940		Leucine-rich repeat (LRR) family protein
AT2G45180	DRN1	Lipid Transfer Protein 1
AT5G07030		Eukaryotic aspartyl protease family protein
AT2G10940		lipid-transfer protein
AT3G23450	KRATOS
AT1G33811	GGL7	GDSL-motif lipase
AT1G05570	CALS1	callose synthase 1
AT2G41740	VLN2	villin 2
AT5G55480	GDPDL4	Glycerophosphodiester phosphodiesterase (GDPD) like 4
AT1G66180		putative aspartyl protease
AT2G24280		alpha/beta-Hydrolases superfamily protein
AT1G74000	SS3	strictosidine synthase 3
